# Supplementary material for: Genome sequencing of Mycobacterium pinnipedii strains: genetic characterization and evidence of superinfection in a South American sea lion (Otaria flavescens)
Source: BMC Genomics. 2019 Dec 30;20:1030. doi: 10.1186/s12864-019-6407-5 (PMC6937676; doi:10.1186/s12864-019-6407-5)
Supplement: Supplementary file 3 — Additional file 3: Table S2. Clusters of orthologous proteins between strains of Mycobacterium pinnipedii. [file 12864_2019_6407_MOESM3_ESM.xlsx]

## Sheet: Orthologous_Mpinnipedii
Silva-Pereira et al; 2019. Genome sequencing of Mycobacterium pinnipedii strains: genetic characterization and evidence of superinfection in a South American sea lion (Otaria flavescens)
Table S2. Clusters of orthologous proteins between strains of Mycobacterium pinnipedii.
	COGs	representative function	M. pinnipedii ATCC BAA-688	M. pinnipedii G01222	M. pinnipedii G01491	M. pinnipedii G01492	M. pinnipedii MP1	M. pinnipedii MP2	M. pinnipedii G01498
cluster3257	C	(2E,6E)-farnesyl diphosphate synthase (EC 2.5.1.10)	MP_ATCC.CDS.3735	MP36.CDS.3725	MP37.CDS.3755	MP38.CDS.3776	MP1.CDS.3774	MP2.CDS.3104	mp39.CDS.3744
cluster3273	C	(2E,6E)-farnesyl diphosphate synthase (EC 2.5.1.10)	MP_ATCC.CDS.3751	MP36.CDS.3708	MP37.CDS.3738	MP38.CDS.3760	MP1.CDS.3758	MP2.CDS.3121	mp39.CDS.3727
cluster1234	C	(2E,6Z)-farnesyl diphosphate synthase (EC 2.5.1.68)	MP_ATCC.CDS.1357	MP36.CDS.1171	MP37.CDS.1234	MP38.CDS.1291	MP1.CDS.1241	MP2.CDS.1239	mp39.CDS.1179
cluster1149	I	(3R)-hydroxyacyl-ACP dehydratase subunit HadA	MP_ATCC.CDS.1253	MP36.CDS.530	MP37.CDS.590	MP38.CDS.587	MP1.CDS.594	MP2.CDS.592	mp39.CDS.532
cluster824	I	(3R)-hydroxyacyl-ACP dehydratase subunit HadA	MP_ATCC.CDS.887	MP36.CDS.676	MP37.CDS.736	MP38.CDS.733	MP1.CDS.742	MP2.CDS.741	mp39.CDS.679
cluster826	I	(3R)-hydroxyacyl-ACP dehydratase subunit HadC	MP_ATCC.CDS.889	MP36.CDS.678	MP37.CDS.738	MP38.CDS.735	MP1.CDS.744	MP2.CDS.743	mp39.CDS.681
cluster3509	I	(MTCY180.06), len: 334. fadB5, Possible oxidoreductase, similar to hydroxyacyl-CoA dehydrogenase, quinone oxidoreductases (EC 1.6.5.5) and polyketide synthases.Contains quinone oxidoreductase / zeta-crystallin signature(PS01162). FASTA results: Q53927 HYDROXYACYL-COA DEHYDROGENASE. (329 aa) opt: 621; E(): 2e-30; 39.5\% identity in349 aa overlap. Similar to many hypothetical M. tuberculosisprotein…	MP_ATCC.CDS.4023	MP36.CDS.2088	MP37.CDS.2124	MP38.CDS.2205	MP1.CDS.2152	MP2.CDS.2152	mp39.CDS.2084
cluster2768	R	[Acyl-carrier-protein] acetyl transferase of FASI (EC 2.3.1.38) / Enoyl-[acyl-carrier-protein] reductase of FASI (EC 1.3.1.9) / 3-hydroxypalmitoyl-[acyl-carrier-protein] dehydratase of FASI (EC 4.2.1.61) / [Acyl-carrier-protein] malonyl transferase of FASI (EC 2.3.1.39) / [Acyl-carrier-protein] palmitoyl transferase of FASI (EC 2.3.1.-) / Acyl carrier protein of FASI / 3-oxoacyl-[acyl-carrier-pro…	MP_ATCC.CDS.3179	MP36.CDS.2764	MP37.CDS.2798	MP38.CDS.2875	MP1.CDS.2826	MP2.CDS.2820	mp39.CDS.2794
cluster1549	I, Q, R	[NiFe] hydrogenase nickel incorporation-associated protein HypB	MP_ATCC.CDS.1739	MP36.CDS.3131	MP37.CDS.3160	MP38.CDS.3187	MP1.CDS.3188	MP2.CDS.3696	mp39.CDS.3145
cluster1550	I, Q, R	[NiFe] hydrogenase nickel incorporation-associated protein HypB	MP_ATCC.CDS.1740	MP36.CDS.3130	MP37.CDS.3159	MP38.CDS.3186	MP1.CDS.3187	MP2.CDS.3697	mp39.CDS.3144
cluster1488	E	[Protein-PII] uridylyltransferase (EC 2.7.7.59)	MP_ATCC.CDS.1673	MP36.CDS.3198	MP37.CDS.3227	MP38.CDS.3254	MP1.CDS.3255	MP2.CDS.3629	mp39.CDS.3212
cluster2595	I	1-acyl-sn-glycerol-3-phosphate acyltransferase (EC 2.3.1.51)	MP_ATCC.CDS.2983	MP36.CDS.3314	MP37.CDS.3346	MP38.CDS.3373	MP1.CDS.3367	MP2.CDS.3513	mp39.CDS.3335
cluster3735	I	1-acyl-sn-glycerol-3-phosphate acyltransferase (EC 2.3.1.51)	MP_ATCC.CDS.4280	MP36.CDS.4171	MP37.CDS.4181	MP38.CDS.4202	MP1.CDS.4212	MP2.CDS.4223	mp39.CDS.4147
cluster3736	I	1-acyl-sn-glycerol-3-phosphate acyltransferase (EC 2.3.1.51)	MP_ATCC.CDS.4281	MP36.CDS.4172	MP37.CDS.4182	MP38.CDS.4203	MP1.CDS.4213	MP2.CDS.4224	mp39.CDS.4148
cluster3737	I	1-acyl-sn-glycerol-3-phosphate acyltransferase (EC 2.3.1.51)	MP_ATCC.CDS.4282	MP36.CDS.4173	MP37.CDS.4183	MP38.CDS.4204	MP1.CDS.4214	MP2.CDS.4225	mp39.CDS.4149
cluster417	I	1-acyl-sn-glycerol-3-phosphate acyltransferase (EC 2.3.1.51)	MP_ATCC.CDS.408	MP36.CDS.2382	MP37.CDS.2413	MP38.CDS.2492	MP1.CDS.2446	MP2.CDS.2443	mp39.CDS.2406
cluster1534	I,H	1-deoxy-D-xylulose 5-phosphate reductoisomerase (EC 1.1.1.267)	MP_ATCC.CDS.1723	MP36.CDS.3147	MP37.CDS.3176	MP38.CDS.3203	MP1.CDS.3204	MP2.CDS.3680	mp39.CDS.3162
cluster40	I,H	1-deoxy-D-xylulose 5-phosphate synthase (EC 2.2.1.7)	MP_ATCC.CDS.3753;MP_ATCC.CDS.606	MP36.CDS.2935;MP36.CDS.3706	MP37.CDS.2965;MP37.CDS.3736	MP38.CDS.2988;MP38.CDS.3758	MP1.CDS.2991;MP1.CDS.3756	MP2.CDS.3123;MP2.CDS.3894	mp39.CDS.2958;mp39.CDS.3725
cluster1536	I,H	1-hydroxy-2-methyl-2-(E)-butenyl 4-diphosphate synthase (EC 1.17.7.1)	MP_ATCC.CDS.1725	MP36.CDS.3145	MP37.CDS.3174	MP38.CDS.3201	MP1.CDS.3202	MP2.CDS.3682	mp39.CDS.3159
cluster3133	I,H	1-phosphofructokinase (EC 2.7.1.56)	MP_ATCC.CDS.3598	MP36.CDS.2215	MP37.CDS.2247	MP38.CDS.2329	MP1.CDS.2278	MP2.CDS.2277	mp39.CDS.2213
cluster3902	I,H	1-phosphofructokinase (EC 2.7.1.56)	MP_ATCC.CDS.3597	MP36.CDS.2216	MP37.CDS.2248		MP1.CDS.2279	MP2.CDS.2278
cluster1654	G	1,4-alpha-glucan (glycogen) branching enzyme, GH-13-type (EC 2.4.1.18)	MP_ATCC.CDS.1856	MP36.CDS.1442	MP37.CDS.1503	MP38.CDS.1563	MP1.CDS.1513	MP2.CDS.1505	mp39.CDS.1452
cluster722	G	1,4-dihydroxy-2-naphthoate polyprenyltransferase (EC 2.5.1.74)	MP_ATCC.CDS.775	MP36.CDS.564	MP37.CDS.623	MP38.CDS.620	MP1.CDS.629	MP2.CDS.626	mp39.CDS.566
cluster1301	S	10 kDa culture filtrate antigen CFP-10 (EsxB)	MP_ATCC.CDS.1440	MP36.CDS.4240	MP37.CDS.4251	MP38.CDS.4269	MP1.CDS.4280	MP2.CDS.4292	mp39.CDS.4217
cluster1659	S	13E12 repeat family protein	MP_ATCC.CDS.1866	MP36.CDS.4339	MP37.CDS.4279	MP38.CDS.4304	MP1.CDS.4295	MP2.CDS.4304	mp39.CDS.4289
cluster3607	S	13E12 repeat family protein	MP_ATCC.CDS.4135	MP36.CDS.408	MP37.CDS.465	MP38.CDS.465	MP1.CDS.472	MP2.CDS.469	mp39.CDS.409
cluster4019	S	13E12 repeat family protein		MP36.CDS.347;MP36.CDS.542
cluster45	S	13E12 repeat family protein	MP_ATCC.CDS.1220;MP_ATCC.CDS.3246	MP36.CDS.2296;MP36.CDS.4130	MP37.CDS.2327;MP37.CDS.4141	MP38.CDS.2406;MP38.CDS.4162	MP1.CDS.2359;MP1.CDS.4173	MP2.CDS.2357;MP2.CDS.4183	mp39.CDS.2318
cluster4947	S	13E12 repeat family protein			MP37.CDS.601
cluster5664	S	13E12 repeat family protein				MP38.CDS.404
cluster5838	S	13E12 repeat family protein			MP37.CDS.402
cluster2443	J	16S rRNA (cytosine(967)-C(5))-methyltransferase (EC 2.1.1.176)	MP_ATCC.CDS.2806	MP36.CDS.1528	MP37.CDS.1587	MP38.CDS.1657	MP1.CDS.1598	MP2.CDS.1590	mp39.CDS.1537
cluster216	J	16S rRNA (guanine(966)-N(2))-methyltransferase (EC 2.1.1.171)	MP_ATCC.CDS.174	MP36.CDS.3255	MP37.CDS.3284	MP38.CDS.3312	MP1.CDS.3308	MP2.CDS.3574	mp39.CDS.3272
cluster1499	J	16S rRNA processing protein RimM	MP_ATCC.CDS.1684	MP36.CDS.3187	MP37.CDS.3215	MP38.CDS.3243	MP1.CDS.3244	MP2.CDS.3640	mp39.CDS.3200
cluster1107	S	19 kDa lipoprotein antigen precursor	MP_ATCC.CDS.1205	MP36.CDS.4115	MP37.CDS.4126	MP38.CDS.4147	MP1.CDS.4158	MP2.CDS.4168	mp39.CDS.2303
cluster3667	M	1D-myo-inositol 2-acetamido-2-deoxy-alpha-D-glucopyranoside deacetylase (EC 3.5.1.103)	MP_ATCC.CDS.4202	MP36.CDS.1273	MP37.CDS.1333	MP38.CDS.1389	MP1.CDS.1341	MP2.CDS.1338	mp39.CDS.1279
cluster196	M	2-amino-4-hydroxy-6-hydroxymethyldihydropteridine pyrophosphokinase (EC 2.7.6.3)	MP_ATCC.CDS.151	MP36.CDS.3948	MP37.CDS.3965	MP38.CDS.3984	MP1.CDS.3992	MP2.CDS.4004	mp39.CDS.3953
cluster173	C	2-C-methyl-D-erythritol 2,4-cyclodiphosphate synthase (EC 4.6.1.12)	MP_ATCC.CDS.127	MP36.CDS.3922	MP37.CDS.3940	MP38.CDS.3958	MP1.CDS.3972	MP2.CDS.2907	mp39.CDS.3928
cluster174	C	2-C-methyl-D-erythritol 4-phosphate cytidylyltransferase (EC 2.7.7.60)	MP_ATCC.CDS.128	MP36.CDS.3923	MP37.CDS.3941	MP38.CDS.3959	MP1.CDS.3973	MP2.CDS.2906	mp39.CDS.3929
cluster2722	E	2-dehydropantoate 2-reductase (EC 1.1.1.169)	MP_ATCC.CDS.3126	MP36.CDS.2817	MP37.CDS.2851	MP38.CDS.1125	MP1.CDS.2881	MP2.CDS.2874	mp39.CDS.2843
cluster161	D	2-hydroxy-6-oxo-6-phenylhexa-2,4-dienoate hydrolase (EC 3.7.1.-)	MP_ATCC.CDS.112	MP36.CDS.3909	MP37.CDS.3926	MP38.CDS.3945	MP1.CDS.3958	MP2.CDS.2920	mp39.CDS.3915
cluster3380	I,H	2-hydroxyhepta-2,4-diene-1,7-dioate isomerase (EC 5.3.3.-) / 5-carboxymethyl-2-oxo-hex-3- ene-1,7-dioate decarboxylase (EC 4.1.1.68)	MP_ATCC.CDS.3883	MP36.CDS.3284	MP37.CDS.3312	MP38.CDS.3341	MP1.CDS.3336	MP2.CDS.3545	mp39.CDS.3303
cluster1059	I	2-isopropylmalate synthase (EC 2.3.3.13)	MP_ATCC.CDS.1150	MP36.CDS.4059	MP37.CDS.4071	MP38.CDS.4091	MP1.CDS.4102	MP2.CDS.4112	mp39.CDS.4061
cluster421	I	2-keto-3-deoxy-D-arabino-heptulosonate-7-phosphate synthase II (EC 2.5.1.54)	MP_ATCC.CDS.412	MP36.CDS.2378	MP37.CDS.2409	MP38.CDS.2488	MP1.CDS.2442	MP2.CDS.2439	mp39.CDS.2402
cluster126	I	2-keto-4-pentenoate hydratase (EC 4.2.1.80)	MP_ATCC.CDS.77	MP36.CDS.3874	MP37.CDS.3891	MP38.CDS.3910	MP1.CDS.3923	MP2.CDS.2955	mp39.CDS.3879
cluster1276	C	2-methylcitrate dehydratase (EC 4.2.1.79)	MP_ATCC.CDS.1409	MP36.CDS.1225	MP37.CDS.1287	MP38.CDS.1342	MP1.CDS.1294	MP2.CDS.1292	mp39.CDS.1233
cluster1277	C	2-methylcitrate synthase (EC 2.3.3.5)	MP_ATCC.CDS.1410	MP36.CDS.1226	MP37.CDS.1288	MP38.CDS.1343	MP1.CDS.1295	MP2.CDS.1293	mp39.CDS.1234
cluster107	S	2-nitropropane dioxygenase (EC 1.13.11.32)	MP_ATCC.CDS.43	MP36.CDS.1674	MP37.CDS.1717	MP38.CDS.1795	MP1.CDS.1739	MP2.CDS.1715	mp39.CDS.1676
cluster143	S	2-nitropropane dioxygenase (EC 1.13.11.32)	MP_ATCC.CDS.94	MP36.CDS.3891	MP37.CDS.3908	MP38.CDS.3927	MP1.CDS.3940	MP2.CDS.2938	mp39.CDS.3896
cluster3490	S	2-nitropropane dioxygenase (EC 1.13.11.32)	MP_ATCC.CDS.4002	MP36.CDS.2066	MP37.CDS.2102	MP38.CDS.2184	MP1.CDS.2131	MP2.CDS.2129	mp39.CDS.2061
cluster673	S	2-nitropropane dioxygenase (EC 1.13.11.32)	MP_ATCC.CDS.718	MP36.CDS.3043	MP37.CDS.3073	MP38.CDS.3097	MP1.CDS.3101	MP2.CDS.3784	mp39.CDS.3059
cluster1434	C	2-oxoglutarate oxidoreductase, alpha subunit (EC 1.2.7.3)	MP_ATCC.CDS.1612	MP36.CDS.2692	MP37.CDS.2723	MP38.CDS.2800	MP1.CDS.2751	MP2.CDS.2747	mp39.CDS.2717
cluster1433	C	2-oxoglutarate oxidoreductase, beta subunit (EC 1.2.7.3)	MP_ATCC.CDS.1611	MP36.CDS.2691	MP37.CDS.2722	MP38.CDS.2799	MP1.CDS.2750	MP2.CDS.2746	mp39.CDS.2716
cluster3390	H	2-phospho-L-lactate guanylyltransferase (EC 2.7.7.68)	MP_ATCC.CDS.3893	MP36.CDS.3274	MP37.CDS.3302	MP38.CDS.3331	MP1.CDS.3326	MP2.CDS.3555	mp39.CDS.3291
cluster1971	H	2-polyprenyl-6-methoxyphenol hydroxylase and related FAD-dependent oxidoreductases	MP_ATCC.CDS.2212	MP36.CDS.1900	MP37.CDS.1937	MP38.CDS.2018	MP1.CDS.1962	MP2.CDS.1941	mp39.CDS.1901
cluster744	H	2-succinyl-5-enolpyruvyl-6-hydroxy-3-cyclohexene-1-carboxylic-acid synthase (EC 2.2.1.9)	MP_ATCC.CDS.799	MP36.CDS.587	MP37.CDS.646	MP38.CDS.644	MP1.CDS.652	MP2.CDS.649	mp39.CDS.590
cluster743	H	2-succinyl-6-hydroxy-2,4-cyclohexadiene-1-carboxylate synthase (EC 4.2.99.20)	MP_ATCC.CDS.798	MP36.CDS.586	MP37.CDS.645	MP38.CDS.643	MP1.CDS.651	MP2.CDS.648	mp39.CDS.589
cluster1075	H	2,3-butanediol dehydrogenase, R-alcohol forming, (R)- and (S)-acetoin-specific (EC 1.1.1.4)	MP_ATCC.CDS.1167	MP36.CDS.4076	MP37.CDS.4088	MP38.CDS.4108	MP1.CDS.4119	MP2.CDS.4129	mp39.CDS.4078
cluster480	H	2,3-dihydroxybenzoate-AMP ligase (EC 2.7.7.58)	MP_ATCC.CDS.486	MP36.CDS.2605	MP37.CDS.2637	MP38.CDS.2712	MP1.CDS.2666	MP2.CDS.2661	mp39.CDS.2629
cluster160	H	2,3-dihydroxybiphenyl 1,2-dioxygenase (EC 1.13.11.39)	MP_ATCC.CDS.111	MP36.CDS.3908	MP37.CDS.3925	MP38.CDS.3944	MP1.CDS.3957	MP2.CDS.2921	mp39.CDS.3914
cluster3250	H	2,3,4,5-tetrahydropyridine-2,6-dicarboxylate N-succinyltransferase (EC 2.3.1.117)	MP_ATCC.CDS.3724	MP36.CDS.1302	MP37.CDS.1363	MP38.CDS.1422	MP1.CDS.1371	MP2.CDS.1367	mp39.CDS.1309
cluster3672	H	2,4-dienoyl-CoA reductase [NADPH] (EC 1.3.1.34)	MP_ATCC.CDS.4207	MP36.CDS.1279	MP37.CDS.1339	MP38.CDS.1395	MP1.CDS.1347	MP2.CDS.1344	mp39.CDS.1285
cluster211	H	2,5-diketo-D-gluconic acid reductase (EC 1.1.1.-)	MP_ATCC.CDS.167	MP36.CDS.3262	MP37.CDS.3290	MP38.CDS.3319	MP1.CDS.3314	MP2.CDS.3567	mp39.CDS.3279
cluster171	J	23S rRNA (guanosine(2251)-2'-O)-methyltransferase (EC 2.1.1.185)	MP_ATCC.CDS.125	MP36.CDS.3920	MP37.CDS.3938	MP38.CDS.3956	MP1.CDS.3970	MP2.CDS.2909	mp39.CDS.3926
cluster590	J	23S rRNA (Uracil-5-) -methyltransferase RumA (EC 2.1.1.-)	MP_ATCC.CDS.614	MP36.CDS.2943	MP37.CDS.2973	MP38.CDS.2996	MP1.CDS.2999	MP2.CDS.3886	mp39.CDS.2966
cluster767	S	27 kDa antigen Cfp30B	MP_ATCC.CDS.823	MP36.CDS.611	MP37.CDS.670	MP38.CDS.668	MP1.CDS.676	MP2.CDS.674	mp39.CDS.614
cluster2896	I, Q, R	3-alpha-(or 20-beta)-hydroxysteroid dehydrogenase (EC 1.1.1.53)	MP_ATCC.CDS.3332	MP36.CDS.2179	MP37.CDS.2210	MP38.CDS.2292	MP1.CDS.2242	MP2.CDS.2241	mp39.CDS.2171
cluster2753	E	3-dehydroquinate dehydratase II (EC 4.2.1.10)	MP_ATCC.CDS.3163	MP36.CDS.2780	MP37.CDS.2814	MP38.CDS.2892	MP1.CDS.2843	MP2.CDS.2836	mp39.CDS.2810
cluster2752	E	3-dehydroquinate synthase (EC 4.2.3.4)	MP_ATCC.CDS.3162	MP36.CDS.2781	MP37.CDS.2815	MP38.CDS.2893	MP1.CDS.2844	MP2.CDS.2837	mp39.CDS.2811
cluster2854	Q	3-demethylubiquinone-9 3-methyltransferase (EC 2.1.1.64)	MP_ATCC.CDS.3279	MP36.CDS.2261	MP37.CDS.2291	MP38.CDS.2375	MP1.CDS.2325	MP2.CDS.2322	mp39.CDS.2260
cluster1292	I	3-hydroxyacyl-CoA dehydrogenase	MP_ATCC.CDS.1426	MP36.CDS.1242	MP37.CDS.1304	MP38.CDS.1359	MP1.CDS.1311	MP2.CDS.1309	mp39.CDS.1250
cluster1932	I	3-hydroxybutyryl-CoA dehydrogenase (EC 1.1.1.157)	MP_ATCC.CDS.2171	MP36.CDS.1858	MP37.CDS.1895	MP38.CDS.1976	MP1.CDS.1920	MP2.CDS.1898	mp39.CDS.1859
cluster1933	I	3-hydroxybutyryl-CoA dehydrogenase (EC 1.1.1.157)	MP_ATCC.CDS.2172	MP36.CDS.1859	MP37.CDS.1896	MP38.CDS.1977	MP1.CDS.1921	MP2.CDS.1899	mp39.CDS.1860
cluster3537	I	3-hydroxybutyryl-CoA dehydrogenase (EC 1.1.1.157); 3-hydroxyacyl-CoA dehydrogenase (EC 1.1.1.35)	MP_ATCC.CDS.4053	MP36.CDS.489	MP37.CDS.549	MP38.CDS.545	MP1.CDS.552	MP2.CDS.549	mp39.CDS.490
cluster939	I	3-hydroxyisobutyrate dehydrogenase (EC 1.1.1.31)	MP_ATCC.CDS.1018	MP36.CDS.801	MP37.CDS.864	MP38.CDS.866	MP1.CDS.870	MP2.CDS.870	mp39.CDS.808
cluster959	I	3-hydroxyisobutyrate dehydrogenase (EC 1.1.1.31)	MP_ATCC.CDS.1039	MP36.CDS.822	MP37.CDS.885	MP38.CDS.888	MP1.CDS.891	MP2.CDS.891	mp39.CDS.829
cluster1219	I	3-hydroxyisobutyryl-CoA hydrolase (EC 3.1.2.4)	MP_ATCC.CDS.1342	MP36.CDS.1156	MP37.CDS.1218	MP38.CDS.1276	MP1.CDS.1225	MP2.CDS.1223	mp39.CDS.1164
cluster3385	I	3-isopropylmalate dehydratase large subunit (EC 4.2.1.33)	MP_ATCC.CDS.3888	MP36.CDS.3279	MP37.CDS.3307	MP38.CDS.3336	MP1.CDS.3331	MP2.CDS.3550	mp39.CDS.3297
cluster5692	I	3-isopropylmalate dehydratase large subunit (EC 4.2.1.33)							mp39.CDS.3298
cluster3386	I	3-isopropylmalate dehydratase small subunit (EC 4.2.1.33)	MP_ATCC.CDS.3889	MP36.CDS.3278	MP37.CDS.3306	MP38.CDS.3335	MP1.CDS.3330	MP2.CDS.3551	mp39.CDS.3296
cluster3379	I	3-isopropylmalate dehydrogenase (EC 1.1.1.85)	MP_ATCC.CDS.3882	MP36.CDS.3285	MP37.CDS.3314	MP38.CDS.3343	MP1.CDS.3337	MP2.CDS.3544	mp39.CDS.3304
cluster3052	S	3-ketoacyl-CoA thiolase (EC 2.3.1.16)	MP_ATCC.CDS.3508	MP36.CDS.979	MP37.CDS.1044	MP38.CDS.1044	MP1.CDS.1050	MP2.CDS.1051	mp39.CDS.984
cluster681	I	3-ketoacyl-CoA thiolase (EC 2.3.1.16)	MP_ATCC.CDS.727	MP36.CDS.3053	MP37.CDS.3082	MP38.CDS.3106	MP1.CDS.3110	MP2.CDS.3775	mp39.CDS.3068
cluster1222	S	3-ketoacyl-CoA thiolase (EC 2.3.1.16) @ Acetyl-CoA acetyltransferase (EC 2.3.1.9)	MP_ATCC.CDS.1345	MP36.CDS.1159	MP37.CDS.1221	MP38.CDS.1279	MP1.CDS.1228	MP2.CDS.1226	mp39.CDS.1167
cluster1282	S	3-ketoacyl-CoA thiolase (EC 2.3.1.16) @ Acetyl-CoA acetyltransferase (EC 2.3.1.9)	MP_ATCC.CDS.1416	MP36.CDS.1232	MP37.CDS.1294	MP38.CDS.1349	MP1.CDS.1301	MP2.CDS.1299	mp39.CDS.1240
cluster146	S	3-ketoacyl-CoA thiolase (EC 2.3.1.16) @ Acetyl-CoA acetyltransferase (EC 2.3.1.9)	MP_ATCC.CDS.97	MP36.CDS.3894	MP37.CDS.3911	MP38.CDS.3930	MP1.CDS.3943	MP2.CDS.2935	mp39.CDS.3899
cluster1656	I	3-ketoacyl-CoA thiolase (EC 2.3.1.16) @ Acetyl-CoA acetyltransferase (EC 2.3.1.9)	MP_ATCC.CDS.1859	MP36.CDS.1438	MP37.CDS.1499	MP38.CDS.1558	MP1.CDS.1509	MP2.CDS.1501	mp39.CDS.1448
cluster2344	H	3-ketoacyl-CoA thiolase (EC 2.3.1.16) @ Acetyl-CoA acetyltransferase (EC 2.3.1.9)	MP_ATCC.CDS.2667	MP36.CDS.252	MP37.CDS.305	MP38.CDS.307	MP1.CDS.313	MP2.CDS.313	mp39.CDS.248
cluster2996	H	3-ketoacyl-CoA thiolase [isoleucine degradation] (EC 2.3.1.16)	MP_ATCC.CDS.3445	MP36.CDS.916	MP37.CDS.980	MP38.CDS.982	MP1.CDS.985	MP2.CDS.987	mp39.CDS.921
cluster372	H	3-methyl-2-oxobutanoate hydroxymethyltransferase (EC 2.1.2.11)	MP_ATCC.CDS.361	MP36.CDS.2430	MP37.CDS.2460	MP38.CDS.2540	MP1.CDS.2494	MP2.CDS.2490	mp39.CDS.2455
cluster1630	I	3-oxoacyl-[acyl-carrier protein] reductase (EC 1.1.1.100)	MP_ATCC.CDS.1832	MP36.CDS.1467	MP37.CDS.1527	MP38.CDS.1587	MP1.CDS.1537	MP2.CDS.1529	mp39.CDS.1476
cluster2036	I	3-oxoacyl-[acyl-carrier protein] reductase (EC 1.1.1.100)	MP_ATCC.CDS.2288	MP36.CDS.1615	MP37.CDS.1661	MP38.CDS.1738	MP1.CDS.1682	MP2.CDS.1673	mp39.CDS.1625
cluster2343	I	3-oxoacyl-[acyl-carrier protein] reductase (EC 1.1.1.100)	MP_ATCC.CDS.2666	MP36.CDS.251	MP37.CDS.304	MP38.CDS.306	MP1.CDS.312	MP2.CDS.312	mp39.CDS.247
cluster658	I	3-oxoacyl-[acyl-carrier protein] reductase (EC 1.1.1.100)	MP_ATCC.CDS.700	MP36.CDS.3026	MP37.CDS.3056	MP38.CDS.3079	MP1.CDS.3083	MP2.CDS.3802	mp39.CDS.3041
cluster874	I	3-oxoacyl-[acyl-carrier protein] reductase (EC 1.1.1.100)	MP_ATCC.CDS.943	MP36.CDS.732	MP37.CDS.792	MP38.CDS.789	MP1.CDS.799	MP2.CDS.798	mp39.CDS.736
cluster958	I	3-oxoacyl-[acyl-carrier protein] reductase (EC 1.1.1.100)	MP_ATCC.CDS.1038	MP36.CDS.821	MP37.CDS.884	MP38.CDS.887	MP1.CDS.890	MP2.CDS.890	mp39.CDS.828
cluster37	I	3-oxoacyl-[acyl-carrier-protein] synthase, KASII (EC 2.3.1.179)	MP_ATCC.CDS.337;MP_ATCC.CDS.338	MP36.CDS.2453;MP36.CDS.2454	MP37.CDS.2483;MP37.CDS.2484	MP38.CDS.2563;MP38.CDS.2564	MP1.CDS.2517;MP1.CDS.2518	MP2.CDS.2513;MP2.CDS.2514	mp39.CDS.2478;mp39.CDS.2479
cluster721	I	3-oxoacyl-[acyl-carrier-protein] synthase, KASIII (EC 2.3.1.180)	MP_ATCC.CDS.774	MP36.CDS.563	MP37.CDS.622	MP38.CDS.619	MP1.CDS.628	MP2.CDS.625	mp39.CDS.565
cluster127	E	3-oxosteroid 1-dehydrogenase (EC 1.3.99.4)	MP_ATCC.CDS.78	MP36.CDS.3875	MP37.CDS.3892	MP38.CDS.3911	MP1.CDS.3924	MP2.CDS.2954	mp39.CDS.3880
cluster1976	E	3,4-dihydroxy-2-butanone 4-phosphate synthase (EC 4.1.99.12) / GTP cyclohydrolase II (EC 3.5.4.25)	MP_ATCC.CDS.2221	MP36.CDS.2120	MP37.CDS.2155	MP38.CDS.2236	MP1.CDS.2184	MP2.CDS.2183	mp39.CDS.2116
cluster2435	E	3,4-dihydroxy-2-butanone 4-phosphate synthase (EC 4.1.99.12) / GTP cyclohydrolase II (EC 3.5.4.25)	MP_ATCC.CDS.2798	MP36.CDS.1536	MP37.CDS.1595	MP38.CDS.1665	MP1.CDS.1606	MP2.CDS.1598	mp39.CDS.1545
cluster1485	J	3'-to-5' oligoribonuclease (orn)	MP_ATCC.CDS.1670	MP36.CDS.2750	MP37.CDS.2783	MP38.CDS.2860	MP1.CDS.2812	MP2.CDS.2806	mp39.CDS.2779
cluster1253	H	3beta-hydroxy-Delta5-steroid dehydrogenase (EC 1.1.1.145)	MP_ATCC.CDS.1381	MP36.CDS.1198	MP37.CDS.1260	MP38.CDS.1317	MP1.CDS.1268	MP2.CDS.1265	mp39.CDS.1206
cluster510	Q	4-alpha-glucanotransferase (amylomaltase) (EC 2.4.1.25)	MP_ATCC.CDS.520	MP36.CDS.1945	MP37.CDS.1980	MP38.CDS.2064	MP1.CDS.2006	MP2.CDS.1989	mp39.CDS.1941
cluster511	Q	4-alpha-glucanotransferase (amylomaltase) (EC 2.4.1.25)	MP_ATCC.CDS.521	MP36.CDS.1944	MP37.CDS.1979	MP38.CDS.2063	MP1.CDS.2005	MP2.CDS.1988	mp39.CDS.1940
cluster2513	R, H	4-diphosphocytidyl-2-C-methyl-D-erythritol kinase (EC 2.7.1.148)	MP_ATCC.CDS.2889	MP36.CDS.1084	MP37.CDS.1149	MP38.CDS.1205	MP1.CDS.1157	MP2.CDS.1155	mp39.CDS.1095
cluster124	S	4-hydroxy-2-oxovalerate aldolase (EC 4.1.3.39)	MP_ATCC.CDS.75	MP36.CDS.3872	MP37.CDS.3889	MP38.CDS.3908	MP1.CDS.3921	MP2.CDS.2957	mp39.CDS.3877
cluster3744	S	4-hydroxy-2-oxovalerate aldolase (EC 4.1.3.39)	MP_ATCC.CDS.4290	MP36.CDS.3807	MP37.CDS.3825	MP38.CDS.1608	MP1.CDS.3856	MP2.CDS.3024	mp39.CDS.3811
cluster1257	R	4-hydroxy-3-methylbut-2-enyl diphosphate reductase (EC 1.17.1.2)	MP_ATCC.CDS.1385	MP36.CDS.1202	MP37.CDS.1264	MP38.CDS.1321	MP1.CDS.1272	MP2.CDS.1269	mp39.CDS.1210
cluster3274	R	4-hydroxy-3-methylbut-2-enyl diphosphate reductase (EC 1.17.1.2)	MP_ATCC.CDS.3752	MP36.CDS.3707	MP37.CDS.3737	MP38.CDS.3759	MP1.CDS.3757	MP2.CDS.3122	mp39.CDS.3726
cluster665	R	4-hydroxy-tetrahydrodipicolinate reductase (EC 1.17.1.8)	MP_ATCC.CDS.709	MP36.CDS.3034	MP37.CDS.3064	MP38.CDS.3088	MP1.CDS.3092	MP2.CDS.3793	mp39.CDS.3050
cluster646	R	4-hydroxy-tetrahydrodipicolinate synthase (EC 4.3.3.7)	MP_ATCC.CDS.685	MP36.CDS.3011	MP37.CDS.3041	MP38.CDS.3064	MP1.CDS.3068	MP2.CDS.3817	mp39.CDS.3026
cluster2382	R	4-keto-6-deoxy-N-Acetyl-D-hexosaminyl-(Lipid carrier) aminotransferase	MP_ATCC.CDS.2714	MP36.CDS.1639	MP37.CDS.1684	MP38.CDS.1762	MP1.CDS.1706	MP2.CDS.1697	mp39.CDS.1648
cluster1907	E	4-nitrophenylphosphatase (EC 3.1.3.41)	MP_ATCC.CDS.2145	MP36.CDS.1831	MP37.CDS.1868	MP38.CDS.1949	MP1.CDS.1893	MP2.CDS.1870	mp39.CDS.1832
cluster684	E	4'-phosphopantetheinyl transferase entD (EC 2.7.8.-)	MP_ATCC.CDS.731	MP36.CDS.3057	MP37.CDS.3086	MP38.CDS.3110	MP1.CDS.3114	MP2.CDS.3771	mp39.CDS.3072
cluster2949	E	4Fe-4S ferredoxin, iron-sulfur binding	MP_ATCC.CDS.3389	MP36.CDS.2185	MP37.CDS.2216	MP38.CDS.2298	MP1.CDS.2248	MP2.CDS.2247	mp39.CDS.2177
cluster3674	E	4Fe-4S ferredoxin, iron-sulfur binding	MP_ATCC.CDS.4209	MP36.CDS.1281	MP37.CDS.1341	MP38.CDS.1397	MP1.CDS.1349	MP2.CDS.1346	mp39.CDS.1287
cluster574	F	5-amino-6-(5-phosphoribosylamino)uracil reductase (EC 1.1.1.193) homolog	MP_ATCC.CDS.595	MP36.CDS.2923	MP37.CDS.2954	MP38.CDS.2977	MP1.CDS.2980	MP2.CDS.3905	mp39.CDS.2947
cluster1711	F	5-Enolpyruvylshikimate-3-phosphate synthase (EC 2.5.1.19)	MP_ATCC.CDS.1926	MP36.CDS.3547	MP37.CDS.3578	MP38.CDS.3600	MP1.CDS.3598	MP2.CDS.3282	mp39.CDS.3566
cluster2534	F	5-formyltetrahydrofolate cyclo-ligase (EC 6.3.3.2)	MP_ATCC.CDS.2913	MP36.CDS.1061	MP37.CDS.1126	MP38.CDS.1182	MP1.CDS.1134	MP2.CDS.1133	mp39.CDS.1072
cluster2805	V	5-methyltetrahydrofolate--homocysteine methyltransferase (EC 2.1.1.13)	MP_ATCC.CDS.3221	MP36.CDS.2320	MP37.CDS.2350	MP38.CDS.2429	MP1.CDS.2384	MP2.CDS.2381	mp39.CDS.2342
cluster1279	E, Q	5-methyltetrahydropteroyltriglutamate--homocysteine methyltransferase (EC 2.1.1.14)	MP_ATCC.CDS.1412	MP36.CDS.1228	MP37.CDS.1290	MP38.CDS.1345	MP1.CDS.1297	MP2.CDS.1295	mp39.CDS.1236
cluster1198	E	5'-methylthioadenosine nucleosidase (EC 3.2.2.16) @ S-adenosylhomocysteine nucleosidase (EC 3.2.2.9)	MP_ATCC.CDS.1309	MP36.CDS.84	MP37.CDS.143	MP38.CDS.140	MP1.CDS.150	MP2.CDS.149	mp39.CDS.83
cluster723	E	5'-methylthioadenosine phosphorylase (EC 2.4.2.28)	MP_ATCC.CDS.776	MP36.CDS.565	MP37.CDS.624	MP38.CDS.621	MP1.CDS.630	MP2.CDS.627	mp39.CDS.567
cluster3783	S	6 kDa early secretory antigenic target ESAT-6 (EsxA)	MP_ATCC.CDS.1441	MP36.CDS.4241	MP37.CDS.4252	MP38.CDS.4270	MP1.CDS.4281	MP2.CDS.4293
cluster3363	C	6-phosphofructokinase (EC 2.7.1.11)	MP_ATCC.CDS.3863	MP36.CDS.3302	MP37.CDS.3333	MP38.CDS.3360	MP1.CDS.3354	MP2.CDS.3526	mp39.CDS.3322
cluster1269	C	6-phosphogluconate dehydrogenase, decarboxylating (EC 1.1.1.44)	MP_ATCC.CDS.1398	MP36.CDS.1215	MP37.CDS.1277	MP38.CDS.1333	MP1.CDS.1285	MP2.CDS.1282	mp39.CDS.1223
cluster3441	C	6-phosphogluconate dehydrogenase, decarboxylating (EC 1.1.1.44)	MP_ATCC.CDS.3949	MP36.CDS.2010	MP37.CDS.2047	MP38.CDS.2130	MP1.CDS.2075	MP2.CDS.2073	mp39.CDS.2008
cluster3824	C	6-phosphogluconolactonase (EC 3.1.1.31), eukaryotic type	MP_ATCC.CDS.2762	MP36.CDS.1570		MP38.CDS.1699	MP1.CDS.1641	MP2.CDS.1650	mp39.CDS.1581
cluster2434	C	6,7-dimethyl-8-ribityllumazine synthase (EC 2.5.1.78)	MP_ATCC.CDS.2797	MP36.CDS.1537	MP37.CDS.1596	MP38.CDS.1666	MP1.CDS.1607	MP2.CDS.1599	mp39.CDS.1546
cluster3670	C	7,8-didemethyl-8-hydroxy-5-deazariboflavin synthase subunit 1 / 7,8-didemethyl-8-hydroxy-5-deazariboflavin synthase subunit 2	MP_ATCC.CDS.4205	MP36.CDS.1277	MP37.CDS.1337	MP38.CDS.1393	MP1.CDS.1345	MP2.CDS.1342	mp39.CDS.1283
cluster72	C	8-amino-7-oxononanoate synthase (EC 2.3.1.47)	MP_ATCC.CDS.5	MP36.CDS.1712	MP37.CDS.1755	MP38.CDS.1833	MP1.CDS.1777	MP2.CDS.1753	mp39.CDS.1714
cluster181	C	A/G-specific adenine glycosylase (EC 3.2.2.-)	MP_ATCC.CDS.135	MP36.CDS.3930	MP37.CDS.3948	MP38.CDS.3966	MP1.CDS.3980	MP2.CDS.2899	mp39.CDS.3936
cluster5662	C	A/G-specific adenine glycosylase (EC 3.2.2.-)				MP38.CDS.3968
cluster2194	O	A3(2) glycogen metabolism clusterI	MP_ATCC.CDS.2489	MP36.CDS.2865	MP37.CDS.2898	MP38.CDS.2918	MP1.CDS.2926	MP2.CDS.3965	mp39.CDS.2890
cluster2948	O	AAA family ATPase	MP_ATCC.CDS.3387	MP36.CDS.2186	MP37.CDS.2217	MP38.CDS.2299	MP1.CDS.2249	MP2.CDS.2248	mp39.CDS.2178
cluster1456	V	ABC transporter ATP-binding protein	MP_ATCC.CDS.1637	MP36.CDS.2716	MP37.CDS.2747	MP38.CDS.2824	MP1.CDS.2775	MP2.CDS.2771	mp39.CDS.2743
cluster1631	V	ABC transporter ATP-binding protein	MP_ATCC.CDS.1833	MP36.CDS.1465	MP37.CDS.1526	MP38.CDS.1586	MP1.CDS.1536	MP2.CDS.1528	mp39.CDS.1475
cluster1632	V	ABC transporter ATP-binding protein	MP_ATCC.CDS.1834	MP36.CDS.1464	MP37.CDS.1525	MP38.CDS.1585	MP1.CDS.1535	MP2.CDS.1527	mp39.CDS.1474
cluster2046	V	ABC transporter ATP-binding protein	MP_ATCC.CDS.2298	MP36.CDS.1604	MP37.CDS.1650	MP38.CDS.1727	MP1.CDS.1671	MP2.CDS.1662	mp39.CDS.1614
cluster2611	V	ABC transporter ATP-binding protein	MP_ATCC.CDS.2999	MP36.CDS.3330	MP37.CDS.3362	MP38.CDS.3389	MP1.CDS.3383	MP2.CDS.3497	mp39.CDS.3351
cluster3291	V	ABC transporter ATP-binding protein	MP_ATCC.CDS.3772	MP36.CDS.3687	MP37.CDS.3717	MP38.CDS.3739	MP1.CDS.3736	MP2.CDS.3143	mp39.CDS.3706
cluster52	V	ABC transporter ATP-binding protein	MP_ATCC.CDS.415;MP_ATCC.CDS.416	MP36.CDS.4321	MP37.CDS.1434;MP37.CDS.1433	MP38.CDS.4284	MP1.CDS.4287	MP2.CDS.4300	mp39.CDS.1380;mp39.CDS.1379
cluster1178	V	ABC transporter permease protein	MP_ATCC.CDS.1287	MP36.CDS.61	MP37.CDS.119	MP38.CDS.117	MP1.CDS.127	MP2.CDS.127	mp39.CDS.62
cluster1901	V	ABC transporter permease protein	MP_ATCC.CDS.2138	MP36.CDS.1824	MP37.CDS.1861	MP38.CDS.1942	MP1.CDS.1886	MP2.CDS.1863	mp39.CDS.1825
cluster3838	V	ABC transporter permease protein	MP_ATCC.CDS.3136	MP36.CDS.2807	MP37.CDS.2841	MP38.CDS.1115	MP1.CDS.2871	MP2.CDS.2864
cluster1884	V	ABC transporter, ATP-binding protein	MP_ATCC.CDS.2120	MP36.CDS.1804	MP37.CDS.1842	MP38.CDS.1923	MP1.CDS.1866	MP2.CDS.1843	mp39.CDS.1805
cluster1967	V	ABC transporter, ATP-binding protein	MP_ATCC.CDS.2208	MP36.CDS.1896	MP37.CDS.1933	MP38.CDS.2014	MP1.CDS.1958	MP2.CDS.1937	mp39.CDS.1897
cluster2136	V	ABC transporter, ATP-binding protein	MP_ATCC.CDS.2415	MP36.CDS.3219	MP37.CDS.3248	MP38.CDS.3276	MP1.CDS.3274	MP2.CDS.3609	mp39.CDS.3234
cluster3417	V	ABC transporter, ATP-binding protein	MP_ATCC.CDS.3923	MP36.CDS.1982	MP37.CDS.2019	MP38.CDS.2104	MP1.CDS.2049	MP2.CDS.2046	mp39.CDS.1982
cluster4460	V	ABC transporter, ATP-binding protein							mp39.CDS.1804
cluster46	V	ABC transporter, ATP-binding protein	MP_ATCC.CDS.1288;MP_ATCC.CDS.3135	MP36.CDS.2808;MP36.CDS.62	MP37.CDS.120;MP37.CDS.2842	MP38.CDS.1116;MP38.CDS.118	MP1.CDS.128;MP1.CDS.2872	MP2.CDS.128;MP2.CDS.2865	mp39.CDS.63
cluster2363	V	ABC transporter, periplasmic iron-transport lipoprotein	MP_ATCC.CDS.2688	MP36.CDS.274	MP37.CDS.326	MP38.CDS.328	MP1.CDS.335	MP2.CDS.334	mp39.CDS.270
cluster1902	V	ABC-type multidrug transport system ATP-binding component yhiH	MP_ATCC.CDS.2139	MP36.CDS.1825	MP37.CDS.1862	MP38.CDS.1943	MP1.CDS.1887	MP2.CDS.1864	mp39.CDS.1826
cluster2059	V	ABC-type multidrug transport system, ATPase component	MP_ATCC.CDS.2313	MP36.CDS.1589	MP37.CDS.1635	MP38.CDS.1712	MP1.CDS.1655	MP2.CDS.1634	mp39.CDS.1599
cluster2060	V	ABC-type multidrug transport system, permease component	MP_ATCC.CDS.2314	MP36.CDS.1588	MP37.CDS.1634	MP38.CDS.1711	MP1.CDS.1654	MP2.CDS.1633	mp39.CDS.1598
cluster3779	C, E	Abortive infection protein AbiGI	MP_ATCC.CDS.1318	MP36.CDS.1133	MP37.CDS.1197		MP1.CDS.1204	MP2.CDS.1202	mp39.CDS.1142
cluster125	C, E	Acetaldehyde dehydrogenase, acetylating, (EC 1.2.1.10) in gene cluster for degradation of phenols, cresols, catechol	MP_ATCC.CDS.76	MP36.CDS.3873	MP37.CDS.3890	MP38.CDS.3909	MP1.CDS.3922	MP2.CDS.2956	mp39.CDS.3878
cluster3595	C, E	Acetate kinase (EC 2.7.2.1)	MP_ATCC.CDS.4117	MP36.CDS.425	MP37.CDS.482	MP38.CDS.481	MP1.CDS.488	MP2.CDS.485	mp39.CDS.426
cluster1479	C, E	Acetoacetyl-CoA synthetase (EC 6.2.1.16) / Long-chain-fatty-acid--CoA ligase (EC 6.2.1.3)	MP_ATCC.CDS.1664	MP36.CDS.2744	MP37.CDS.2777	MP38.CDS.2854	MP1.CDS.2806	MP2.CDS.2800	mp39.CDS.2773
cluster3745	C, E	Acetohydroxy acid synthase	MP_ATCC.CDS.4291	MP36.CDS.3808	MP37.CDS.3826	MP38.CDS.1607	MP1.CDS.3857	MP2.CDS.3023	mp39.CDS.3812
cluster3370	E, H	Acetolactate synthase large subunit (EC 2.2.1.6)	MP_ATCC.CDS.3871	MP36.CDS.3295	MP37.CDS.3326	MP38.CDS.3353	MP1.CDS.3347	MP2.CDS.3533	mp39.CDS.3315
cluster3371	E, H	Acetolactate synthase small subunit (EC 2.2.1.6)	MP_ATCC.CDS.3872	MP36.CDS.3294	MP37.CDS.3325	MP38.CDS.3352	MP1.CDS.3346	MP2.CDS.3534	mp39.CDS.3314
cluster5612	E, H	Acetolactate synthase small subunit (EC 2.2.1.6)							mp39.CDS.3313
cluster3462	I	Acetyl-CoA acetyltransferase	MP_ATCC.CDS.3972	MP36.CDS.2035	MP37.CDS.2070	MP38.CDS.2153	MP1.CDS.2100	MP2.CDS.2098	mp39.CDS.2031
cluster2959	I	Acetyl-CoA:Cys-GlcN-Ins acetyltransferase, mycothiol synthase MshD	MP_ATCC.CDS.3401	MP36.CDS.872	MP37.CDS.934	MP38.CDS.937	MP1.CDS.940	MP2.CDS.942	mp39.CDS.877
cluster3040	I	Acetyl-coenzyme A carboxyl transferase alpha chain (EC 6.4.1.2) / Acetyl-coenzyme A carboxyl transferase beta chain (EC 6.4.1.2)	MP_ATCC.CDS.3496	MP36.CDS.967	MP37.CDS.1032	MP38.CDS.1032	MP1.CDS.1038	MP2.CDS.1039	mp39.CDS.972
cluster1012	I	Acetyl-coenzyme A synthetase (EC 6.2.1.1)	MP_ATCC.CDS.1100	MP36.CDS.4008	MP37.CDS.4022	MP38.CDS.4041	MP1.CDS.4052	MP2.CDS.4061	mp39.CDS.4011
cluster1877	I	Acetylglutamate kinase (EC 2.7.2.8)	MP_ATCC.CDS.2107	MP36.CDS.1789	MP37.CDS.1829	MP38.CDS.1910	MP1.CDS.1853	MP2.CDS.1830	mp39.CDS.1789
cluster1878	I	Acetylornithine aminotransferase (EC 2.6.1.11)	MP_ATCC.CDS.2108	MP36.CDS.1790	MP37.CDS.1830	MP38.CDS.1911	MP1.CDS.1854	MP2.CDS.1831	mp39.CDS.1790
cluster3713	I	Acetyltransferase (EC 2.3.1.-)	MP_ATCC.CDS.4256	MP36.CDS.2370	MP37.CDS.2400	MP38.CDS.2479	MP1.CDS.2434	MP2.CDS.2431	mp39.CDS.2393
cluster666	I	Acetyltransferase, GNAT family	MP_ATCC.CDS.711	MP36.CDS.3036	MP37.CDS.3066	MP38.CDS.3090	MP1.CDS.3094	MP2.CDS.3791	mp39.CDS.3052
cluster2018	I	AclJ	MP_ATCC.CDS.2267	MP36.CDS.3482	MP37.CDS.3511	MP38.CDS.3537	MP1.CDS.3533	MP2.CDS.3348	mp39.CDS.3502
cluster3189	I	AclJ	MP_ATCC.CDS.3661	MP36.CDS.1366	MP37.CDS.1426	MP38.CDS.1487	MP1.CDS.1437	MP2.CDS.1432	mp39.CDS.1373
cluster83	I	AclJ	MP_ATCC.CDS.16	MP36.CDS.1701	MP37.CDS.1744	MP38.CDS.1822	MP1.CDS.1766	MP2.CDS.1742	mp39.CDS.1703
cluster2043	C, E	Aconitate hydratase (EC 4.2.1.3) @ 2-methylisocitrate dehydratase (EC 4.2.1.99)	MP_ATCC.CDS.2295	MP36.CDS.1607	MP37.CDS.1653	MP38.CDS.1730	MP1.CDS.1674	MP2.CDS.1665	mp39.CDS.1617
cluster1636	I	acyl carrier protein	MP_ATCC.CDS.1838	MP36.CDS.1460	MP37.CDS.1521	MP38.CDS.1581	MP1.CDS.1531	MP2.CDS.1523	mp39.CDS.1470
cluster352	I	Acyl carrier protein	MP_ATCC.CDS.339	MP36.CDS.2452	MP37.CDS.2482	MP38.CDS.2562	MP1.CDS.2516	MP2.CDS.2512	mp39.CDS.2477
cluster2235	I	Acyl dehydratase	MP_ATCC.CDS.2546	MP36.CDS.129	MP37.CDS.185	MP38.CDS.185	MP1.CDS.193	MP2.CDS.192	mp39.CDS.126
cluster2342	I	Acyl dehydratase	MP_ATCC.CDS.2665	MP36.CDS.250	MP37.CDS.303	MP38.CDS.305	MP1.CDS.311	MP2.CDS.311	mp39.CDS.246
cluster2897	I	Acyl-ACP thioesterase	MP_ATCC.CDS.3333	MP36.CDS.2178	MP37.CDS.2209	MP38.CDS.2291	MP1.CDS.2241	MP2.CDS.2240	mp39.CDS.2170
cluster3539	I	Acyl-ACP thioesterase	MP_ATCC.CDS.4055	MP36.CDS.487	MP37.CDS.547	MP38.CDS.543	MP1.CDS.550	MP2.CDS.547	mp39.CDS.488
cluster1105	I	Acyl-CoA dehydrogenase (EC 1.3.8.1), Mycobacterial subgroup FadE36	MP_ATCC.CDS.1203	MP36.CDS.4113	MP37.CDS.4124	MP38.CDS.4145	MP1.CDS.4156	MP2.CDS.4166	mp39.CDS.2301
cluster2332	I	Acyl-CoA dehydrogenase (EC 1.3.8.7)	MP_ATCC.CDS.2655	MP36.CDS.239	MP37.CDS.292	MP38.CDS.294	MP1.CDS.300	MP2.CDS.300	mp39.CDS.235
cluster26	I	Acyl-CoA dehydrogenase (EC 1.3.8.7)	MP_ATCC.CDS.2304;MP_ATCC.CDS.2668	MP36.CDS.1598;MP36.CDS.253	MP37.CDS.1644;MP37.CDS.306	MP38.CDS.1721;MP38.CDS.308	MP1.CDS.1664;MP1.CDS.314	MP2.CDS.1643;MP2.CDS.314	mp39.CDS.1608;mp39.CDS.249
cluster859	I	Acyl-CoA dehydrogenase (EC 1.3.8.7)	MP_ATCC.CDS.927	MP36.CDS.716	MP37.CDS.776	MP38.CDS.773	MP1.CDS.783	MP2.CDS.782	mp39.CDS.720
cluster165	I	Acyl-CoA dehydrogenase (EC 1.3.99.-)	MP_ATCC.CDS.117	MP36.CDS.3913	MP37.CDS.3930	MP38.CDS.3949	MP1.CDS.3962	MP2.CDS.2916	mp39.CDS.3919
cluster153	I	Acyl-CoA dehydrogenase, short-chain specific (EC 1.3.8.1)	MP_ATCC.CDS.104	MP36.CDS.3901	MP37.CDS.3918	MP38.CDS.3937	MP1.CDS.3950	MP2.CDS.2928	mp39.CDS.3906
cluster1593	I	Acyl-CoA dehydrogenase, short-chain specific (EC 1.3.8.1)	MP_ATCC.CDS.1790	MP36.CDS.3845	MP37.CDS.3862	MP38.CDS.3881	MP1.CDS.3892	MP2.CDS.2988	mp39.CDS.3847
cluster1894	I	Acyl-CoA dehydrogenase, short-chain specific (EC 1.3.8.1)	MP_ATCC.CDS.2131	MP36.CDS.1816	MP37.CDS.1853	MP38.CDS.1934	MP1.CDS.1878	MP2.CDS.1855	mp39.CDS.1817
cluster2236	I	Acyl-CoA dehydrogenase, short-chain specific (EC 1.3.8.1)	MP_ATCC.CDS.2547	MP36.CDS.130	MP37.CDS.186	MP38.CDS.186	MP1.CDS.194	MP2.CDS.193	mp39.CDS.127
cluster2316	I	Acyl-CoA dehydrogenase, short-chain specific (EC 1.3.8.1)	MP_ATCC.CDS.2639	MP36.CDS.223	MP37.CDS.276	MP38.CDS.278	MP1.CDS.284	MP2.CDS.284	mp39.CDS.219
cluster2369	I	Acyl-CoA dehydrogenase, short-chain specific (EC 1.3.8.1)	MP_ATCC.CDS.2695	MP36.CDS.281	MP37.CDS.333	MP38.CDS.335	MP1.CDS.342	MP2.CDS.341	mp39.CDS.277
cluster3010	I	Acyl-CoA dehydrogenase, short-chain specific (EC 1.3.8.1)	MP_ATCC.CDS.3460	MP36.CDS.932	MP37.CDS.998	MP38.CDS.998	MP1.CDS.1002	MP2.CDS.1003	mp39.CDS.938
cluster3110	I	Acyl-CoA dehydrogenase, short-chain specific (EC 1.3.8.1)	MP_ATCC.CDS.3571	MP36.CDS.1044	MP37.CDS.1106	MP38.CDS.1106	MP1.CDS.1114	MP2.CDS.1114	mp39.CDS.1051
cluster550	I	Acyl-CoA dehydrogenase, short-chain specific (EC 1.3.8.1)	MP_ATCC.CDS.566	MP36.CDS.3443	MP37.CDS.3471	MP38.CDS.3498	MP1.CDS.3493	MP2.CDS.3388	mp39.CDS.3463
cluster623	I	Acyl-CoA dehydrogenase, short-chain specific (EC 1.3.8.1)	MP_ATCC.CDS.650	MP36.CDS.2976	MP37.CDS.3007	MP38.CDS.3030	MP1.CDS.3032	MP2.CDS.3852	mp39.CDS.3000
cluster680	I	Acyl-CoA dehydrogenase, short-chain specific (EC 1.3.8.1)	MP_ATCC.CDS.726	MP36.CDS.3052	MP37.CDS.3081	MP38.CDS.3105	MP1.CDS.3109	MP2.CDS.3776	mp39.CDS.3067
cluster940	I	Acyl-CoA dehydrogenase, short-chain specific (EC 1.3.8.1)	MP_ATCC.CDS.1019	MP36.CDS.802	MP37.CDS.865	MP38.CDS.867	MP1.CDS.871	MP2.CDS.871	mp39.CDS.809
cluster1635	I	acyl-CoA synthetase	MP_ATCC.CDS.1837	MP36.CDS.1461	MP37.CDS.1522	MP38.CDS.1582	MP1.CDS.1532	MP2.CDS.1524	mp39.CDS.1471
cluster2	I	Acyl-CoA synthetases (AMP-forming)/AMP-acid ligases II	MP_ATCC.CDS.222;MP_ATCC.CDS.2409;MP_ATCC.CDS.2420;MP_ATCC.CDS.2430;MP_ATCC.CDS.4216;MP_ATCC.CDS.47;MP_ATCC.CDS.56	MP36.CDS.1288;MP36.CDS.1660;MP36.CDS.1670;MP36.CDS.3211;MP36.CDS.3224;MP36.CDS.3234;MP36.CDS.4183	MP37.CDS.1348;MP37.CDS.1704;MP37.CDS.1713;MP37.CDS.3240;MP37.CDS.3253;MP37.CDS.3263;MP37.CDS.4194	MP38.CDS.1782;MP38.CDS.1791;MP38.CDS.3268;MP38.CDS.3281;MP38.CDS.3291;MP38.CDS.4214;MP38.CDS.1405	MP1.CDS.1356;MP1.CDS.1726;MP1.CDS.1735;MP1.CDS.3268;MP1.CDS.3279;MP1.CDS.3289;MP1.CDS.4224	MP2.CDS.1353;MP2.CDS.1711;MP2.CDS.2030;MP2.CDS.3594;MP2.CDS.3604;MP2.CDS.3615;MP2.CDS.4235	mp39.CDS.1296;mp39.CDS.1661;mp39.CDS.1672;mp39.CDS.3225;mp39.CDS.3239;mp39.CDS.3250;mp39.CDS.4160
cluster4795	I	Acyl-CoA synthetases (AMP-forming)/AMP-acid ligases II				MP38.CDS.1404
cluster1841	I	Acyl-CoA thioesterase II (EC 3.1.2.-)	MP_ATCC.CDS.2065	MP36.CDS.1748	MP37.CDS.1790	MP38.CDS.1870	MP1.CDS.1812	MP2.CDS.1790	mp39.CDS.1750
cluster2691	I	Acyl-CoA thioesterase II (EC 3.1.2.-)	MP_ATCC.CDS.3092	MP36.CDS.2851	MP37.CDS.2885	MP38.CDS.1159	MP1.CDS.2915	MP2.CDS.3978	mp39.CDS.2878
cluster260	I	Acylphosphate phosphohydrolase (EC 3.6.1.7), putative	MP_ATCC.CDS.230	MP36.CDS.3203	MP37.CDS.3232	MP38.CDS.3260	MP1.CDS.3260	MP2.CDS.3623	mp39.CDS.3217
cluster2328	I	Acyltransferase (EC 2.3.1.-)	MP_ATCC.CDS.2651	MP36.CDS.235	MP37.CDS.288	MP38.CDS.290	MP1.CDS.296	MP2.CDS.296	mp39.CDS.231
cluster1997	I	Acyltransferase family protein	MP_ATCC.CDS.2243	MP36.CDS.2098	MP37.CDS.2133	MP38.CDS.2214	MP1.CDS.2162	MP2.CDS.2161	mp39.CDS.2094
cluster2422	I	acyltransferase family protein	MP_ATCC.CDS.2784	MP36.CDS.1549	MP37.CDS.1608	MP38.CDS.1678	MP1.CDS.1620	MP2.CDS.1612	mp39.CDS.1560
cluster2711	S	Adenine phosphoribosyltransferase (EC 2.4.2.7)	MP_ATCC.CDS.3114	MP36.CDS.2829	MP37.CDS.2863	MP38.CDS.1137	MP1.CDS.2892	MP2.CDS.2886	mp39.CDS.2855
cluster1795	F	Adenosine deaminase (EC 3.5.4.4)	MP_ATCC.CDS.2016	MP36.CDS.3637	MP37.CDS.3668	MP38.CDS.3689	MP1.CDS.3687	MP2.CDS.3192	mp39.CDS.3656
cluster396	F	Adenosine kinase (EC 2.7.1.20)	MP_ATCC.CDS.387	MP36.CDS.2403	MP37.CDS.2434	MP38.CDS.2513	MP1.CDS.2468	MP2.CDS.2464	mp39.CDS.2428
cluster2354	F	Adenosylcobinamide kinase (EC 2.7.1.156) / Adenosylcobinamide-phosphate guanylyltransferase (EC 2.7.7.62)	MP_ATCC.CDS.2678	MP36.CDS.263	MP37.CDS.316	MP38.CDS.318	MP1.CDS.325	MP2.CDS.324	mp39.CDS.259
cluster360	F	Adenosylcobinamide-phosphate synthase (EC 6.3.1.10)	MP_ATCC.CDS.348	MP36.CDS.2443	MP37.CDS.2473	MP38.CDS.2553	MP1.CDS.2507	MP2.CDS.2503	mp39.CDS.2468
cluster1730	F	Adenosylhomocysteinase (EC 3.3.1.1)	MP_ATCC.CDS.1947	MP36.CDS.3568	MP37.CDS.3599	MP38.CDS.3621	MP1.CDS.3619	MP2.CDS.3261	mp39.CDS.3587
cluster73	F	Adenosylmethionine-8-amino-7-oxononanoate aminotransferase (EC 2.6.1.62)	MP_ATCC.CDS.6	MP36.CDS.1711	MP37.CDS.1754	MP38.CDS.1832	MP1.CDS.1776	MP2.CDS.1752	mp39.CDS.1713
cluster11	T	Adenylate cyclase (EC 4.6.1.1)	MP_ATCC.CDS.1863;MP_ATCC.CDS.1864;MP_ATCC.CDS.3837	MP36.CDS.1431;MP36.CDS.1434;MP36.CDS.1435	MP37.CDS.1491;MP37.CDS.1495;MP37.CDS.1496	MP38.CDS.1551;MP38.CDS.1554;MP38.CDS.1553	MP1.CDS.1500;MP1.CDS.1503;MP1.CDS.1504	MP2.CDS.1494;MP2.CDS.1497;MP2.CDS.1498	mp39.CDS.1441;mp39.CDS.1444;mp39.CDS.1443
cluster1267	F	Adenylate cyclase (EC 4.6.1.1)	MP_ATCC.CDS.1395	MP36.CDS.1212	MP37.CDS.1274	MP38.CDS.1331	MP1.CDS.1282	MP2.CDS.1279	mp39.CDS.1220
cluster1416	T	Adenylate cyclase (EC 4.6.1.1)	MP_ATCC.CDS.1590	MP36.CDS.2669	MP37.CDS.2701	MP38.CDS.2777	MP1.CDS.2729	MP2.CDS.2724	mp39.CDS.2694
cluster386	T	Adenylate cyclase (EC 4.6.1.1)	MP_ATCC.CDS.377	MP36.CDS.2415	MP37.CDS.2445	MP38.CDS.2525	MP1.CDS.2479	MP2.CDS.2475	mp39.CDS.2439
cluster3988	F	Adenylate cyclase (EC 4.6.1.1)		MP36.CDS.1432			MP1.CDS.1501	MP2.CDS.1495
cluster4008	F	Adenylate cyclase (EC 4.6.1.1)			MP37.CDS.1492	MP38.CDS.1552			mp39.CDS.1442
cluster4580	F	Adenylate cyclase (EC 4.6.1.1)				MP38.CDS.4308
cluster4746	F	Adenylate cyclase (EC 4.6.1.1)							mp39.CDS.4272
cluster4747	T	Adenylate cyclase (EC 4.6.1.1)							mp39.CDS.4270
cluster5087	T	Adenylate cyclase (EC 4.6.1.1)			MP37.CDS.1493
cluster5247	T	Adenylate cyclase (EC 4.6.1.1)				MP38.CDS.4310
cluster529	T	Adenylate cyclase (EC 4.6.1.1)	MP_ATCC.CDS.544	MP36.CDS.1433	MP37.CDS.1494	MP38.CDS.4309	MP1.CDS.1502	MP2.CDS.1496	mp39.CDS.4271
cluster4126	X	Mobile element protein	MP_ATCC.CDS.2247
cluster4143	S	PPE family protein	MP_ATCC.CDS.1313
cluster991	F	Adenylate cyclase (EC 4.6.1.1)	MP_ATCC.CDS.1073	MP36.CDS.3980	MP37.CDS.3996	MP38.CDS.4015	MP1.CDS.4026	MP2.CDS.4036	mp39.CDS.3987
cluster921	T	Adenylate kinase (EC 2.7.4.3)	MP_ATCC.CDS.993	MP36.CDS.781	MP37.CDS.841	MP38.CDS.838	MP1.CDS.848	MP2.CDS.847	mp39.CDS.785
cluster966	F	Adenylosuccinate lyase (EC 4.3.2.2)	MP_ATCC.CDS.1046	MP36.CDS.829	MP37.CDS.892	MP38.CDS.895	MP1.CDS.898	MP2.CDS.898	mp39.CDS.836
cluster3642	E	Adenylosuccinate synthetase (EC 6.3.4.4)	MP_ATCC.CDS.4175	MP36.CDS.369	MP37.CDS.425	MP38.CDS.426	MP1.CDS.433	MP2.CDS.430	mp39.CDS.369
cluster1622	N, T	Adenylyl cyclase class-3/4/guanylyl cyclase	MP_ATCC.CDS.1822	MP36.CDS.1477	MP37.CDS.1537	MP38.CDS.1597	MP1.CDS.1547	MP2.CDS.1539	mp39.CDS.1486
cluster3026	N, T	Adenylyl cyclase class-3/4/guanylyl cyclase	MP_ATCC.CDS.3482	MP36.CDS.953	MP37.CDS.1018	MP38.CDS.1018	MP1.CDS.1024	MP2.CDS.1025	mp39.CDS.958
cluster5	N, T	Adenylyl cyclase class-3/4/guanylyl cyclase / Disease resistance domain-containing protein / Tetratricopeptide repeat-containing protein / Transcriptional regulator, LuxR family	MP_ATCC.CDS.1646;MP_ATCC.CDS.1823;MP_ATCC.CDS.3481;MP_ATCC.CDS.4144;MP_ATCC.CDS.4145	MP36.CDS.1476;MP36.CDS.2726;MP36.CDS.399;MP36.CDS.952	MP37.CDS.1017;MP37.CDS.1536;MP37.CDS.2758;MP37.CDS.456;MP37.CDS.455	MP38.CDS.1017;MP38.CDS.1596;MP38.CDS.2835;MP38.CDS.456	MP1.CDS.1023;MP1.CDS.1546;MP1.CDS.2787;MP1.CDS.463	MP2.CDS.1024;MP2.CDS.1538;MP2.CDS.2781;MP2.CDS.460	mp39.CDS.1485;mp39.CDS.2753;mp39.CDS.957;mp39.CDS.400;mp39.CDS.399
cluster1165	C	ADP-ribose 1"-phosphate phophatase related protein	MP_ATCC.CDS.1270	MP36.CDS.44	MP37.CDS.101	MP38.CDS.100	MP1.CDS.110	MP2.CDS.110	mp39.CDS.44
cluster1915	C	ADP-ribose pyrophosphatase (EC 3.6.1.13)	MP_ATCC.CDS.2153	MP36.CDS.1839	MP37.CDS.1876	MP38.CDS.1957	MP1.CDS.1901	MP2.CDS.1878	mp39.CDS.1840
cluster3627	C	Aerobic carbon monoxide dehydrogenase molybdenum cofactor insertion protein CoxF	MP_ATCC.CDS.4160	MP36.CDS.384	MP37.CDS.440	MP38.CDS.441	MP1.CDS.448	MP2.CDS.445	mp39.CDS.384
cluster3456	M	Alanine and proline-rich secreted protein Apa (45 kDa glycoprotein) (45/47 kDa antigen) (Antigen MPT-32) (FAP-B) (Fibronectin attachment protein) (Immunogenic protein MPT32)	MP_ATCC.CDS.3965	MP36.CDS.2026	MP37.CDS.2063	MP38.CDS.2146	MP1.CDS.2091	MP2.CDS.2089	mp39.CDS.2024
cluster671	M	Alanine dehydrogenase (EC 1.4.1.1)	MP_ATCC.CDS.716	MP36.CDS.3041	MP37.CDS.3071	MP38.CDS.3095	MP1.CDS.3099	MP2.CDS.3786	mp39.CDS.3057
cluster672	M	Alanine dehydrogenase (EC 1.4.1.1)	MP_ATCC.CDS.717	MP36.CDS.3042	MP37.CDS.3072	MP38.CDS.3096	MP1.CDS.3100	MP2.CDS.3785	mp39.CDS.3058
cluster2558	M	Alanine racemase (EC 5.1.1.1)	MP_ATCC.CDS.2940	MP36.CDS.3751	MP37.CDS.3781	MP38.CDS.3802	MP1.CDS.3801	MP2.CDS.3078	mp39.CDS.3771
cluster3769	M	Alanine-rich, phage-related, membrane protein	MP_ATCC.CDS.675	MP36.CDS.3001	MP37.CDS.3031	MP38.CDS.3054	MP1.CDS.3058	MP2.CDS.3827
cluster2735	M	Alanyl-tRNA synthetase (EC 6.1.1.7)	MP_ATCC.CDS.3144	MP36.CDS.2799	MP37.CDS.2833	MP38.CDS.2911	MP1.CDS.2863	MP2.CDS.2856	mp39.CDS.2829
cluster110	E, R	Alcohol dehydrogenase (EC 1.1.1.1)	MP_ATCC.CDS.46	MP36.CDS.1671	MP37.CDS.1714	MP38.CDS.1792	MP1.CDS.1736	MP2.CDS.1712	mp39.CDS.1673
cluster2268	E, R	Alcohol dehydrogenase (EC 1.1.1.1)	MP_ATCC.CDS.2582	MP36.CDS.167	MP37.CDS.221	MP38.CDS.221	MP1.CDS.229	MP2.CDS.228	mp39.CDS.163
cluster2655	E, R	Alcohol dehydrogenase (EC 1.1.1.1)	MP_ATCC.CDS.3048	MP36.CDS.3379	MP37.CDS.3410	MP38.CDS.3439	MP1.CDS.3432	MP2.CDS.3448	mp39.CDS.3402
cluster3458	E, R	Alcohol dehydrogenase (EC 1.1.1.1)	MP_ATCC.CDS.3968	MP36.CDS.2029	MP37.CDS.2066	MP38.CDS.2149	MP1.CDS.2094	MP2.CDS.2092	mp39.CDS.2027
cluster950	E, R	Alcohol dehydrogenase (EC 1.1.1.1)	MP_ATCC.CDS.1029	MP36.CDS.812	MP37.CDS.875	MP38.CDS.878	MP1.CDS.881	MP2.CDS.881	mp39.CDS.819
cluster1949	C	Aldehyde dehydrogenase (EC 1.2.1.3)	MP_ATCC.CDS.2190	MP36.CDS.1878	MP37.CDS.1915	MP38.CDS.1996	MP1.CDS.1940	MP2.CDS.1919	mp39.CDS.1879
cluster2252	C	Aldehyde dehydrogenase (EC 1.2.1.3)	MP_ATCC.CDS.2563	MP36.CDS.146	MP37.CDS.202	MP38.CDS.202	MP1.CDS.210	MP2.CDS.209	mp39.CDS.143
cluster2323	C	Aldehyde dehydrogenase (EC 1.2.1.3)	MP_ATCC.CDS.2646	MP36.CDS.230	MP37.CDS.283	MP38.CDS.285	MP1.CDS.291	MP2.CDS.291	mp39.CDS.226
cluster3547	C	Aldehyde dehydrogenase (EC 1.2.1.3)	MP_ATCC.CDS.4063	MP36.CDS.479	MP37.CDS.537	MP38.CDS.535	MP1.CDS.542	MP2.CDS.539	mp39.CDS.480
cluster957	C	Aldehyde dehydrogenase (EC 1.2.1.3)	MP_ATCC.CDS.1037	MP36.CDS.820	MP37.CDS.883	MP38.CDS.886	MP1.CDS.889	MP2.CDS.889	mp39.CDS.827
cluster1775	C	Aldehyde dehydrogenase B (EC 1.2.1.22)	MP_ATCC.CDS.1995	MP36.CDS.3616	MP37.CDS.3646	MP38.CDS.3668	MP1.CDS.3666	MP2.CDS.3213	mp39.CDS.3634
cluster1547	C	Aldehyde dehydrogenase in hypothetical Actinobacterial gene cluster	MP_ATCC.CDS.1737	MP36.CDS.3133	MP37.CDS.3162	MP38.CDS.3189	MP1.CDS.3190	MP2.CDS.3694	mp39.CDS.3147
cluster4046	C	Aldo-keto reductase		MP36.CDS.1805					mp39.CDS.1806
cluster308	C	aldo/keto reductase	MP_ATCC.CDS.288	MP36.CDS.2505	MP37.CDS.2535	MP38.CDS.2611	MP1.CDS.2566	MP2.CDS.2562	mp39.CDS.2528
cluster3524	C	Aliphatic amidase AmiE (EC 3.5.1.4)	MP_ATCC.CDS.4040	MP36.CDS.502	MP37.CDS.563	MP38.CDS.559	MP1.CDS.566	MP2.CDS.563	mp39.CDS.503
cluster856	I	Alkaline ceramidase	MP_ATCC.CDS.924	MP36.CDS.713	MP37.CDS.773	MP38.CDS.770	MP1.CDS.780	MP2.CDS.779	mp39.CDS.717
cluster1734	I	Alkane-1 monooxygenase (EC 1.14.15.3)	MP_ATCC.CDS.1951	MP36.CDS.3572	MP37.CDS.3603	MP38.CDS.3625	MP1.CDS.3623	MP2.CDS.3257	mp39.CDS.3591
cluster1950	S	Alkyl hydroperoxide reductase and/or thiol-specific antioxidant family (AhpC/TSA) protein	MP_ATCC.CDS.2191	MP36.CDS.1879	MP37.CDS.1916	MP38.CDS.1997	MP1.CDS.1941	MP2.CDS.1920	mp39.CDS.1880
cluster1410	S	Alkyl hydroperoxide reductase protein C (EC 1.6.4.-)	MP_ATCC.CDS.1582	MP36.CDS.2662	MP37.CDS.2693	MP38.CDS.2770	MP1.CDS.2722	MP2.CDS.2717	mp39.CDS.2687
cluster3925	S	Alkyl hydroperoxide reductase protein C (EC 1.6.4.-)	MP_ATCC.CDS.1583		MP37.CDS.2694	MP38.CDS.2771			mp39.CDS.2688
cluster1830	I	Alkyl hydroperoxide reductase subunit C-like protein	MP_ATCC.CDS.2054	MP36.CDS.1737	MP37.CDS.1779	MP38.CDS.1859	MP1.CDS.1801	MP2.CDS.1778	mp39.CDS.1739
cluster358	I	Alkyl hydroperoxide reductase subunit C-like protein	MP_ATCC.CDS.345	MP36.CDS.2446	MP37.CDS.2476	MP38.CDS.2556	MP1.CDS.2510	MP2.CDS.2506	mp39.CDS.2471
cluster1106	I	Alkyl sulfatase (EC 3.1.6.-)	MP_ATCC.CDS.1204	MP36.CDS.4114	MP37.CDS.4125	MP38.CDS.4146	MP1.CDS.4157	MP2.CDS.4167	mp39.CDS.2302
cluster2524	L	Alkylated DNA repair protein	MP_ATCC.CDS.2902	MP36.CDS.1072	MP37.CDS.1137	MP38.CDS.1193	MP1.CDS.1145	MP2.CDS.1143	mp39.CDS.1083
cluster2677	L	Alkyldihydroxyacetonephosphate synthase (EC 2.5.1.26)	MP_ATCC.CDS.3073	MP36.CDS.3404	MP37.CDS.3433	MP38.CDS.3462	MP1.CDS.3455	MP2.CDS.3424	mp39.CDS.3426
cluster1411	L	Alkylhydroperoxidase protein D	MP_ATCC.CDS.1584	MP36.CDS.2663	MP37.CDS.2695	MP38.CDS.2772	MP1.CDS.2723	MP2.CDS.2718	mp39.CDS.2689
cluster2362	L	Allophanate hydrolase 2 subunit 1 (EC 3.5.1.54)	MP_ATCC.CDS.2687	MP36.CDS.273	MP37.CDS.325	MP38.CDS.327	MP1.CDS.334	MP2.CDS.333	mp39.CDS.269
cluster2361	L	Allophanate hydrolase 2 subunit 2 (EC 3.5.1.54)	MP_ATCC.CDS.2686	MP36.CDS.272	MP37.CDS.324	MP38.CDS.326	MP1.CDS.333	MP2.CDS.332	mp39.CDS.268
cluster774	S	Alpha-1,2-mannosidase	MP_ATCC.CDS.830	MP36.CDS.618	MP37.CDS.678	MP38.CDS.676	MP1.CDS.684	MP2.CDS.682	mp39.CDS.622
cluster1451	G	Alpha-glucosidase (EC 3.2.1.20)	MP_ATCC.CDS.1631	MP36.CDS.2710	MP37.CDS.2741	MP38.CDS.2818	MP1.CDS.2769	MP2.CDS.2765	mp39.CDS.2736
cluster5195	G	Alpha-glucosidase (EC 3.2.1.20)							mp39.CDS.2737
cluster2542	G	Alpha-ketoglutarate-dependent taurine dioxygenase (EC 1.14.11.17)	MP_ATCC.CDS.2923	MP36.CDS.3734	MP37.CDS.3764	MP38.CDS.3785	MP1.CDS.3783	MP2.CDS.3095	mp39.CDS.3754
cluster837	G	Alpha-mannosidase (EC 3.2.1.24)	MP_ATCC.CDS.900	MP36.CDS.689	MP37.CDS.749	MP38.CDS.746	MP1.CDS.755	MP2.CDS.754	mp39.CDS.692
cluster1291	R	Alpha-methylacyl-CoA racemase (EC 5.1.99.4)	MP_ATCC.CDS.1425	MP36.CDS.1241	MP37.CDS.1303	MP38.CDS.1358	MP1.CDS.1310	MP2.CDS.1308	mp39.CDS.1249
cluster2992	R	Alpha-methylacyl-CoA racemase (EC 5.1.99.4)	MP_ATCC.CDS.3441	MP36.CDS.912	MP37.CDS.976	MP38.CDS.978	MP1.CDS.981	MP2.CDS.983	mp39.CDS.917
cluster1607	R	Alpha,alpha-trehalose-phosphate synthase [UDP-forming] (EC 2.4.1.15)	MP_ATCC.CDS.1805	MP36.CDS.3829	MP37.CDS.3846	MP38.CDS.3866	MP1.CDS.3877	MP2.CDS.3003	mp39.CDS.3831
cluster3307	R	Alpha/beta hydrolase family	MP_ATCC.CDS.3792	MP36.CDS.3666	MP37.CDS.3698	MP38.CDS.3719	MP1.CDS.3717	MP2.CDS.3162	mp39.CDS.3685
cluster3308	R	Alpha/beta hydrolase family	MP_ATCC.CDS.3793	MP36.CDS.3665	MP37.CDS.3697	MP38.CDS.3718	MP1.CDS.3716	MP2.CDS.3163	mp39.CDS.3684
cluster2015	J	Amidase	MP_ATCC.CDS.2264	MP36.CDS.3479	MP37.CDS.3508	MP38.CDS.3534	MP1.CDS.3529	MP2.CDS.3351	mp39.CDS.3499
cluster5437	J	Amidase					MP1.CDS.3530
cluster3187	J	Amidase family protein MSMEG_4492	MP_ATCC.CDS.3659	MP36.CDS.1368	MP37.CDS.1428	MP38.CDS.1489	MP1.CDS.1439	MP2.CDS.1434	mp39.CDS.1375
cluster499	J	Amidase family protein MSMEG_4492	MP_ATCC.CDS.508	MP36.CDS.2583	MP37.CDS.2616	MP38.CDS.2690	MP1.CDS.2644	MP2.CDS.2639	mp39.CDS.2607
cluster3474	Q	Amidohydrolase	MP_ATCC.CDS.3984	MP36.CDS.2048	MP37.CDS.2084	MP38.CDS.2166	MP1.CDS.2113	MP2.CDS.2111	mp39.CDS.2043
cluster3252	Q	Amidohydrolase family protein	MP_ATCC.CDS.3727	MP36.CDS.4316	MP37.CDS.4271	MP38.CDS.4290	MP1.CDS.3897	MP2.CDS.2983	mp39.CDS.3852
cluster2882	E	Amidophosphoribosyltransferase (EC 2.4.2.14)	MP_ATCC.CDS.3314	MP36.CDS.860	MP37.CDS.923	MP38.CDS.926	MP1.CDS.929	MP2.CDS.931	mp39.CDS.866
cluster2010	E	Amine oxidase [flavin-containing] A (EC 1.4.3.4)	MP_ATCC.CDS.2259	MP36.CDS.3474	MP37.CDS.3503	MP38.CDS.3529	MP1.CDS.3524	MP2.CDS.3356	mp39.CDS.3494
cluster1735	E	Amino acid permease	MP_ATCC.CDS.1952	MP36.CDS.3573	MP37.CDS.3604	MP38.CDS.3626	MP1.CDS.3624	MP2.CDS.3256	mp39.CDS.3592
cluster282	E	Amino acid permease	MP_ATCC.CDS.256	MP36.CDS.2536	MP37.CDS.2567	MP38.CDS.2642	MP1.CDS.2596	MP2.CDS.2592	mp39.CDS.2558
cluster4047	E	Amino acid permease		MP36.CDS.2151			MP1.CDS.2214
cluster2878	E, R	Aminodeoxychorismate lyase (EC 4.1.3.38)	MP_ATCC.CDS.3310	MP36.CDS.864	MP37.CDS.927	MP38.CDS.930	MP1.CDS.933	MP2.CDS.935	mp39.CDS.870
cluster2360	E, R	Aminoglycoside 2'-N-acetyltransferase AAC (AAC(2')-IC)	MP_ATCC.CDS.2685	MP36.CDS.271	MP37.CDS.323	MP38.CDS.325	MP1.CDS.332	MP2.CDS.331	mp39.CDS.267
cluster3738	E, R	aminoglycoside 3'-phosphotransferase	MP_ATCC.CDS.4283	MP36.CDS.4174	MP37.CDS.4184	MP38.CDS.4205	MP1.CDS.4215	MP2.CDS.4226	mp39.CDS.4150
cluster387	E, R	Aminomethyltransferase (glycine cleavage system T protein) (EC 2.1.2.10)	MP_ATCC.CDS.378	MP36.CDS.2414	MP37.CDS.2444	MP38.CDS.2524	MP1.CDS.2478	MP2.CDS.2474	mp39.CDS.2438
cluster3585	E, R	Aminopeptidase Y (Arg, Lys, Leu preference) (EC 3.4.11.15)	MP_ATCC.CDS.4107	MP36.CDS.435	MP37.CDS.492	MP38.CDS.491	MP1.CDS.498	MP2.CDS.495	mp39.CDS.436
cluster2755	E, R	Aminopeptidase YpdF (MP-, MA-, MS-, AP-, NP- specific)	MP_ATCC.CDS.3165	MP36.CDS.2778	MP37.CDS.2812	MP38.CDS.2890	MP1.CDS.2841	MP2.CDS.2834	mp39.CDS.2808
cluster1486	P	Ammonium transporter	MP_ATCC.CDS.1671	MP36.CDS.3200	MP37.CDS.3229	MP38.CDS.3256	MP1.CDS.3257	MP2.CDS.3626	mp39.CDS.3214
cluster4471	P	Ammonium transporter						MP2.CDS.3627
cluster1979	E	anthranilate dioxygenase reductase	MP_ATCC.CDS.2224	MP36.CDS.2117	MP37.CDS.2152	MP38.CDS.2233	MP1.CDS.2181	MP2.CDS.2180	mp39.CDS.2113
cluster3796	E	Anthranilate synthase, amidotransferase component (EC 4.1.3.27) @ Para-aminobenzoate synthase, amidotransferase component (EC 2.6.1.85)	MP_ATCC.CDS.1508	MP36.CDS.4308	MP37.CDS.53	MP38.CDS.52	MP1.CDS.62	MP2.CDS.62
cluster1831	E	Anthranilate synthase, aminase component (EC 4.1.3.27)	MP_ATCC.CDS.2055	MP36.CDS.1738	MP37.CDS.1780	MP38.CDS.1860	MP1.CDS.1802	MP2.CDS.1779	mp39.CDS.1740
cluster1033	T	Anti-sigma F factor antagonist (spoIIAA-2); Anti-sigma B factor antagonist RsbV	MP_ATCC.CDS.1122	MP36.CDS.4030	MP37.CDS.4044	MP38.CDS.4063	MP1.CDS.4074	MP2.CDS.4083	mp39.CDS.4033
cluster2173	T	Anti-sigma F factor antagonist (spoIIAA-2); Anti-sigma B factor antagonist RsbV	MP_ATCC.CDS.2465	MP36.CDS.2889	MP37.CDS.2922	MP38.CDS.2942	MP1.CDS.2949	MP2.CDS.3939	mp39.CDS.2914
cluster2480	T	Anti-sigma F factor antagonist (spoIIAA-2); Anti-sigma B factor antagonist RsbV	MP_ATCC.CDS.2848	MP36.CDS.1486	MP37.CDS.1545	MP38.CDS.1615	MP1.CDS.1556	MP2.CDS.1548	mp39.CDS.1495
cluster3501	T	Anti-sigma F factor antagonist (spoIIAA-2); Anti-sigma B factor antagonist RsbV	MP_ATCC.CDS.4014	MP36.CDS.2079	MP37.CDS.2115	MP38.CDS.2196	MP1.CDS.2143	MP2.CDS.2143	mp39.CDS.2075
cluster704	T	Anti-sigma F factor antagonist (spoIIAA-2); Anti-sigma B factor antagonist RsbV	MP_ATCC.CDS.754	MP36.CDS.543	MP37.CDS.602	MP38.CDS.599	MP1.CDS.607	MP2.CDS.604	mp39.CDS.544
cluster1704	T	Anti-sigma factor	MP_ATCC.CDS.1919	MP36.CDS.3540	MP37.CDS.3571	MP38.CDS.3593	MP1.CDS.3591	MP2.CDS.3289	mp39.CDS.3559
cluster184	R	Antibiotic biosynthesis monooxygenase	MP_ATCC.CDS.138	MP36.CDS.3934	MP37.CDS.3952	MP38.CDS.3971	MP1.CDS.4291	MP2.CDS.2896	mp39.CDS.3939
cluster642	R	Antibiotic biosynthesis monooxygenase	MP_ATCC.CDS.681	MP36.CDS.3007	MP37.CDS.3037	MP38.CDS.3060	MP1.CDS.3064	MP2.CDS.3821	mp39.CDS.3022
cluster2234	R	Antigen 85-C precursor (85C) (Antigen 85 complex C) (Ag85C) (Mycolyl transferase 85C) (EC 2.3.1.-)	MP_ATCC.CDS.2544	MP36.CDS.127	MP37.CDS.183	MP38.CDS.183	MP1.CDS.191	MP2.CDS.190	mp39.CDS.124
cluster3723	R	Antigen 85-C precursor (85C) (Antigen 85 complex C) (Ag85C) (Mycolyl transferase 85C) (EC 2.3.1.-)	MP_ATCC.CDS.4267	MP36.CDS.4157	MP37.CDS.4168	MP38.CDS.4189	MP1.CDS.4199	MP2.CDS.4209	mp39.CDS.4134
cluster42	R	Antigen 85-C precursor (85C) (Antigen 85 complex C) (Ag85C) (Mycolyl transferase 85C) (EC 2.3.1.-)	MP_ATCC.CDS.3991;MP_ATCC.CDS.4268	MP36.CDS.2055;MP36.CDS.4158	MP37.CDS.2091;MP37.CDS.4169	MP38.CDS.2173;MP38.CDS.4190	MP1.CDS.2120;MP1.CDS.4200	MP2.CDS.2118;MP2.CDS.4210	mp39.CDS.2050;mp39.CDS.4135
cluster1171	S	Antitoxin 1	MP_ATCC.CDS.1277	MP36.CDS.51	MP37.CDS.108	MP38.CDS.107	MP1.CDS.117	MP2.CDS.117	mp39.CDS.52
cluster1467	S	Antitoxin 1	MP_ATCC.CDS.1651	MP36.CDS.2732	MP37.CDS.2764	MP38.CDS.2841	MP1.CDS.2793	MP2.CDS.2787	mp39.CDS.2760
cluster1939	S	Antitoxin 1	MP_ATCC.CDS.2179	MP36.CDS.1867	MP37.CDS.1904	MP38.CDS.1985	MP1.CDS.1929	MP2.CDS.1907	mp39.CDS.1868
cluster3098	S	Antitoxin 1	MP_ATCC.CDS.3558	MP36.CDS.1030	MP37.CDS.1093	MP38.CDS.1093	MP1.CDS.1101	MP2.CDS.1101	mp39.CDS.1037
cluster3841	S	Antitoxin 1	MP_ATCC.CDS.3171	MP36.CDS.2772	MP37.CDS.2806	MP38.CDS.2884		MP2.CDS.2828	mp39.CDS.2802
cluster738	S	Antitoxin 1a	MP_ATCC.CDS.792	MP36.CDS.581	MP37.CDS.639	MP38.CDS.637	MP1.CDS.646	MP2.CDS.643	mp39.CDS.583
cluster337	S	Apolipoprotein N-acyltransferase (EC 2.3.1.-)	MP_ATCC.CDS.322	MP36.CDS.2469	MP37.CDS.2500	MP38.CDS.2579	MP1.CDS.2533	MP2.CDS.2529	mp39.CDS.2494
cluster2871	S	Apolipoprotein N-acyltransferase (EC 2.3.1.-) in lipid-linked oligosaccharide synthesis cluster	MP_ATCC.CDS.3297	MP36.CDS.2243	MP37.CDS.2273	MP38.CDS.2357	MP1.CDS.2307	MP2.CDS.2304	mp39.CDS.2242
cluster2180	S	Archease	MP_ATCC.CDS.2474	MP36.CDS.2880	MP37.CDS.2913	MP38.CDS.2933	MP1.CDS.2941	MP2.CDS.3950	mp39.CDS.2905
cluster2523	Q	Arginine deiminase (EC 3.5.3.6)	MP_ATCC.CDS.2901	MP36.CDS.1073	MP37.CDS.1138	MP38.CDS.1194	MP1.CDS.1146	MP2.CDS.1144	mp39.CDS.1084
cluster1880	Q	Arginine pathway regulatory protein ArgR, repressor of arg regulon	MP_ATCC.CDS.2110	MP36.CDS.1792	MP37.CDS.1832	MP38.CDS.1913	MP1.CDS.1856	MP2.CDS.1833	mp39.CDS.1792
cluster1882	Q	Argininosuccinate lyase (EC 4.3.2.1)	MP_ATCC.CDS.2112	MP36.CDS.1794	MP37.CDS.1834	MP38.CDS.1915	MP1.CDS.1858	MP2.CDS.1835	mp39.CDS.1794
cluster1881	Q	Argininosuccinate synthase (EC 6.3.4.5)	MP_ATCC.CDS.2111	MP36.CDS.1793	MP37.CDS.1833	MP38.CDS.1914	MP1.CDS.1857	MP2.CDS.1834	mp39.CDS.1793
cluster3158	R	Arginyl-tRNA synthetase (EC 6.1.1.19)	MP_ATCC.CDS.3625	MP36.CDS.1401	MP37.CDS.1464	MP38.CDS.1523	MP1.CDS.1472	MP2.CDS.1467	mp39.CDS.1411
cluster1098	R	Arogenate dehydrogenase (EC 1.3.1.43)	MP_ATCC.CDS.1196	MP36.CDS.4106	MP37.CDS.4117	MP38.CDS.4138	MP1.CDS.4149	MP2.CDS.4159	mp39.CDS.4108
cluster170	E	Arsenic efflux pump protein	MP_ATCC.CDS.124	MP36.CDS.3919	MP37.CDS.3937	MP38.CDS.3955	MP1.CDS.3969	MP2.CDS.2910	mp39.CDS.3925
cluster1025	E	Arsenical pump-driving ATPase (EC 3.6.3.16)	MP_ATCC.CDS.1114	MP36.CDS.4021	MP37.CDS.4035	MP38.CDS.4054	MP1.CDS.4065	MP2.CDS.4074	mp39.CDS.4024
cluster1026	C	Arsenical pump-driving ATPase (EC 3.6.3.16)	MP_ATCC.CDS.1115	MP36.CDS.4022	MP37.CDS.4036	MP38.CDS.4055	MP1.CDS.4066	MP2.CDS.4075	mp39.CDS.4025
cluster415	C	Arsenical pump-driving ATPase (EC 3.6.3.16)	MP_ATCC.CDS.406	MP36.CDS.2384	MP37.CDS.2415	MP38.CDS.2494	MP1.CDS.2448	MP2.CDS.2445	mp39.CDS.2408
cluster2169	C	Arsenical resistance operon repressor	MP_ATCC.CDS.2461	MP36.CDS.2893	MP37.CDS.2926	MP38.CDS.2946	MP1.CDS.2953	MP2.CDS.3935	mp39.CDS.2918
cluster2168	C	Arsenical-resistance protein ACR3	MP_ATCC.CDS.2460	MP36.CDS.2894	MP37.CDS.2927	MP38.CDS.2947	MP1.CDS.2954	MP2.CDS.3934	mp39.CDS.2919
cluster22	P	Arylsulfatase (EC 3.1.6.1)	MP_ATCC.CDS.2001;MP_ATCC.CDS.917	MP36.CDS.3622;MP36.CDS.706	MP37.CDS.3652;MP37.CDS.766	MP38.CDS.3674;MP38.CDS.763	MP1.CDS.3672;MP1.CDS.772	MP2.CDS.3207;MP2.CDS.771	mp39.CDS.3640;mp39.CDS.709
cluster899	P	Arylsulfatase (EC 3.1.6.1)	MP_ATCC.CDS.970	MP36.CDS.758	MP37.CDS.818	MP38.CDS.815	MP1.CDS.825	MP2.CDS.824	mp39.CDS.762
cluster397	E	Asparagine synthetase [glutamine-hydrolyzing] (EC 6.3.5.4) AsnB	MP_ATCC.CDS.388	MP36.CDS.2402	MP37.CDS.2433	MP38.CDS.2512	MP1.CDS.2467	MP2.CDS.2463	mp39.CDS.2427
cluster191	E	Aspartate 1-decarboxylase (EC 4.1.1.11)	MP_ATCC.CDS.146	MP36.CDS.3943	MP37.CDS.3960	MP38.CDS.3979	MP1.CDS.3987	MP2.CDS.3999	mp39.CDS.3948
cluster2119	E	Aspartate aminotransferase (EC 2.6.1.1)	MP_ATCC.CDS.2388	MP36.CDS.348	MP37.CDS.403	MP38.CDS.405	MP1.CDS.412	MP2.CDS.409	mp39.CDS.347
cluster2469	E	Aspartate carbamoyltransferase (EC 2.1.3.2)	MP_ATCC.CDS.2835	MP36.CDS.1499	MP37.CDS.1558	MP38.CDS.1628	MP1.CDS.1569	MP2.CDS.1561	mp39.CDS.1508
cluster1071	E	Aspartate transaminase (EC 2.6.1.1)	MP_ATCC.CDS.1162	MP36.CDS.4071	MP37.CDS.4083	MP38.CDS.4103	MP1.CDS.4114	MP2.CDS.4124	mp39.CDS.4073
cluster1057	E	Aspartate-semialdehyde dehydrogenase (EC 1.2.1.11)	MP_ATCC.CDS.1148	MP36.CDS.4057	MP37.CDS.4069	MP38.CDS.4089	MP1.CDS.4100	MP2.CDS.4110	mp39.CDS.4059
cluster1058	E	Aspartokinase (EC 2.7.2.4)	MP_ATCC.CDS.1149	MP36.CDS.4058	MP37.CDS.4070	MP38.CDS.4090	MP1.CDS.4101	MP2.CDS.4111	mp39.CDS.4060
cluster2723	E	Aspartyl-tRNA synthetase (EC 6.1.1.12) @ Aspartyl-tRNA(Asn) synthetase (EC 6.1.1.23)	MP_ATCC.CDS.3127	MP36.CDS.2816	MP37.CDS.2850	MP38.CDS.1124	MP1.CDS.2880	MP2.CDS.2873	mp39.CDS.2842
cluster3362	E	Aspartyl-tRNA(Asn) amidotransferase subunit A (EC 6.3.5.6) @ Glutamyl-tRNA(Gln) amidotransferase subunit A (EC 6.3.5.7)	MP_ATCC.CDS.3862	MP36.CDS.3303	MP37.CDS.3334	MP38.CDS.3361	MP1.CDS.3355	MP2.CDS.3525	mp39.CDS.3323
cluster3364	E	Aspartyl-tRNA(Asn) amidotransferase subunit B (EC 6.3.5.6) @ Glutamyl-tRNA(Gln) amidotransferase subunit B (EC 6.3.5.7)	MP_ATCC.CDS.3864	MP36.CDS.3301	MP37.CDS.3332	MP38.CDS.3359	MP1.CDS.3353	MP2.CDS.3527	mp39.CDS.3321
cluster3361	E	Aspartyl-tRNA(Asn) amidotransferase subunit C (EC 6.3.5.6) @ Glutamyl-tRNA(Gln) amidotransferase subunit C (EC 6.3.5.7)	MP_ATCC.CDS.3861	MP36.CDS.3304	MP37.CDS.3335	MP38.CDS.3362	MP1.CDS.3356	MP2.CDS.3524	mp39.CDS.3324
cluster272	E	Assimilatory nitrate reductase large subunit (EC 1.7.99.4)	MP_ATCC.CDS.244	MP36.CDS.2548	MP37.CDS.2579	MP38.CDS.2654	MP1.CDS.2608	MP2.CDS.2604	mp39.CDS.2570
cluster66	D	ATP binding cassette (ABC) transporter homolog	MP_ATCC.CDS.2616	MP36.CDS.201;MP36.CDS.202	MP37.CDS.255	MP38.CDS.255	MP1.CDS.263	MP2.CDS.262	mp39.CDS.197
cluster2808	O	ATP phosphoribosyltransferase (EC 2.4.2.17)	MP_ATCC.CDS.3224	MP36.CDS.2317	MP37.CDS.2347	MP38.CDS.2426	MP1.CDS.2381	MP2.CDS.2378	mp39.CDS.2339
cluster3142	O	ATP synthase alpha chain (EC 3.6.3.14)	MP_ATCC.CDS.3609	MP36.CDS.1418	MP37.CDS.1480	MP38.CDS.1539	MP1.CDS.1488	MP2.CDS.1483	mp39.CDS.1427
cluster3140	O	ATP synthase beta chain (EC 3.6.3.14)	MP_ATCC.CDS.3607	MP36.CDS.1420	MP37.CDS.1482	MP38.CDS.1541	MP1.CDS.1490	MP2.CDS.1485	mp39.CDS.1429
cluster3139	O	ATP synthase epsilon chain (EC 3.6.3.14)	MP_ATCC.CDS.3606	MP36.CDS.1421	MP37.CDS.1483	MP38.CDS.1542	MP1.CDS.1491	MP2.CDS.1486	mp39.CDS.1430
cluster3146	D	ATP synthase F0 sector subunit a (EC 3.6.3.14)	MP_ATCC.CDS.3613	MP36.CDS.1414	MP37.CDS.1476	MP38.CDS.1535	MP1.CDS.1484	MP2.CDS.1479	mp39.CDS.1423
cluster3143	D	ATP synthase F0 sector subunit b (EC 3.6.3.14) / ATP synthase delta chain (EC 3.6.3.14)	MP_ATCC.CDS.3610	MP36.CDS.1417	MP37.CDS.1479	MP38.CDS.1538	MP1.CDS.1487	MP2.CDS.1482	mp39.CDS.1426
cluster3144	D	ATP synthase F0 sector subunit b' (EC 3.6.3.14)	MP_ATCC.CDS.3611	MP36.CDS.1416	MP37.CDS.1478	MP38.CDS.1537	MP1.CDS.1486	MP2.CDS.1481	mp39.CDS.1425
cluster3145	D	ATP synthase F0 sector subunit c (EC 3.6.3.14)	MP_ATCC.CDS.3612	MP36.CDS.1415	MP37.CDS.1477	MP38.CDS.1536	MP1.CDS.1485	MP2.CDS.1480	mp39.CDS.1424
cluster3141	D	ATP synthase gamma chain (EC 3.6.3.14)	MP_ATCC.CDS.3608	MP36.CDS.1419	MP37.CDS.1481	MP38.CDS.1540	MP1.CDS.1489	MP2.CDS.1484	mp39.CDS.1428
cluster3147	D	ATP synthase protein I	MP_ATCC.CDS.3614	MP36.CDS.1413	MP37.CDS.1475	MP38.CDS.1534	MP1.CDS.1483	MP2.CDS.1478	mp39.CDS.1422
cluster1649	D	ATP-dependent Clp protease adaptor protein ClpS	MP_ATCC.CDS.1851	MP36.CDS.1447	MP37.CDS.1508	MP38.CDS.1568	MP1.CDS.1518	MP2.CDS.1510	mp39.CDS.1457
cluster1436	O	ATP-dependent Clp protease ATP-binding subunit ClpX	MP_ATCC.CDS.1616	MP36.CDS.2695	MP37.CDS.2726	MP38.CDS.2803	MP1.CDS.2754	MP2.CDS.2750	mp39.CDS.2720
cluster1439	L	ATP-dependent Clp protease proteolytic subunit (EC 3.4.21.92)	MP_ATCC.CDS.1619	MP36.CDS.2698	MP37.CDS.2729	MP38.CDS.2806	MP1.CDS.2757	MP2.CDS.2753	mp39.CDS.2723
cluster1440	L	ATP-dependent Clp protease proteolytic subunit (EC 3.4.21.92)	MP_ATCC.CDS.1620	MP36.CDS.2699	MP37.CDS.2730	MP38.CDS.2807	MP1.CDS.2758	MP2.CDS.2754	mp39.CDS.2724
cluster20	L	ATP-dependent Clp protease, ATP-binding subunit ClpC / Negative regulator of genetic competence clcC/mecB	MP_ATCC.CDS.142;MP_ATCC.CDS.4147	MP36.CDS.3939;MP36.CDS.397	MP37.CDS.3956;MP37.CDS.453	MP38.CDS.3975;MP38.CDS.454	MP1.CDS.3983;MP1.CDS.461	MP2.CDS.3995;MP2.CDS.458	mp39.CDS.3944;mp39.CDS.397
cluster209	L	ATP-dependent DNA helicase RecG (EC 3.6.1.-)	MP_ATCC.CDS.165	MP36.CDS.3264	MP37.CDS.3292	MP38.CDS.3321	MP1.CDS.3316	MP2.CDS.3565	mp39.CDS.3281
cluster1681	O	ATP-dependent DNA helicase SCO5183	MP_ATCC.CDS.1895	MP36.CDS.3515	MP37.CDS.3545	MP38.CDS.3569	MP1.CDS.3567	MP2.CDS.3314	mp39.CDS.3534
cluster1680	O	ATP-dependent DNA helicase SCO5184	MP_ATCC.CDS.1894	MP36.CDS.3514	MP37.CDS.3544	MP38.CDS.3568	MP1.CDS.3566	MP2.CDS.3315	mp39.CDS.3533
cluster3087	O	ATP-dependent DNA helicase UvrD/PcrA	MP_ATCC.CDS.3545	MP36.CDS.1018	MP37.CDS.1082	MP38.CDS.1082	MP1.CDS.1088	MP2.CDS.1088	mp39.CDS.1024
cluster1676	L	ATP-dependent DNA helicase UvrD/PcrA, actinomycete paralog	MP_ATCC.CDS.1889	MP36.CDS.3510	MP37.CDS.3540	MP38.CDS.3564	MP1.CDS.3562	MP2.CDS.3319	mp39.CDS.3529
cluster1078	L	ATP-dependent DNA ligase (EC 6.5.1.1)	MP_ATCC.CDS.1172	MP36.CDS.4081	MP37.CDS.4093	MP38.CDS.4113	MP1.CDS.4124	MP2.CDS.4134	mp39.CDS.4083
cluster2367	D	ATP-dependent DNA ligase (EC 6.5.1.1)	MP_ATCC.CDS.2693	MP36.CDS.279	MP37.CDS.331	MP38.CDS.333	MP1.CDS.340	MP2.CDS.339	mp39.CDS.275
cluster2633	L	ATP-dependent DNA ligase (EC 6.5.1.1)	MP_ATCC.CDS.3024	MP36.CDS.3354	MP37.CDS.3385	MP38.CDS.3414	MP1.CDS.3407	MP2.CDS.3473	mp39.CDS.3376
cluster3077	D	ATP-dependent DNA ligase (EC 6.5.1.1) clustered with Ku protein, LigD	MP_ATCC.CDS.3534	MP36.CDS.1006	MP37.CDS.1070	MP38.CDS.1070	MP1.CDS.1076	MP2.CDS.1076	mp39.CDS.1012
cluster1079	D	ATP-dependent DNA ligase (EC 6.5.1.1) LigC	MP_ATCC.CDS.1173	MP36.CDS.4082	MP37.CDS.4094	MP38.CDS.4114	MP1.CDS.4125	MP2.CDS.4135	mp39.CDS.4084
cluster63	O	ATP-dependent helicase	MP_ATCC.CDS.1077;MP_ATCC.CDS.1078	MP36.CDS.3984	MP37.CDS.4000	MP38.CDS.4019	MP1.CDS.4030	MP2.CDS.4040	mp39.CDS.3991
cluster1693	L	ATP-dependent RNA helicase	MP_ATCC.CDS.1907	MP36.CDS.3527	MP37.CDS.3557	MP38.CDS.3581	MP1.CDS.3579	MP2.CDS.3302	mp39.CDS.3546
cluster202	L	ATP:Cob(I)alamin adenosyltransferase (EC 2.5.1.17)	MP_ATCC.CDS.157	MP36.CDS.1424	MP37.CDS.1486	MP38.CDS.1545	MP1.CDS.1493	MP2.CDS.1488	mp39.CDS.1434
cluster1484	D	ATPase	MP_ATCC.CDS.1669	MP36.CDS.2749	MP37.CDS.2782	MP38.CDS.2859	MP1.CDS.2811	MP2.CDS.2805	mp39.CDS.2778
cluster2020	D	ATPase	MP_ATCC.CDS.2270	MP36.CDS.3485	MP37.CDS.3514	MP38.CDS.3540	MP1.CDS.3536	MP2.CDS.3345	mp39.CDS.3505
cluster3247	D	ATPase	MP_ATCC.CDS.3721	MP36.CDS.1305	MP37.CDS.1366	MP38.CDS.1425	MP1.CDS.1374	MP2.CDS.1370	mp39.CDS.1312
cluster784	D	ATPase	MP_ATCC.CDS.843	MP36.CDS.632	MP37.CDS.691	MP38.CDS.689	MP1.CDS.698	MP2.CDS.696	mp39.CDS.635
cluster630	D	ATPase involved in DNA repair	MP_ATCC.CDS.657	MP36.CDS.2983	MP37.CDS.3014	MP38.CDS.3037	MP1.CDS.3040	MP2.CDS.3845	mp39.CDS.3007
cluster2731	D	ATPase, AAA family	MP_ATCC.CDS.3140	MP36.CDS.2803	MP37.CDS.2837	MP38.CDS.2915	MP1.CDS.2867	MP2.CDS.2860	mp39.CDS.2833
cluster678	D	ATPases involved in chromosome partitioning	MP_ATCC.CDS.724	MP36.CDS.3050	MP37.CDS.3079	MP38.CDS.3103	MP1.CDS.3107	MP2.CDS.3778	mp39.CDS.3065
cluster230	S	AttE component of AttEFGH ABC transport system	MP_ATCC.CDS.191	MP36.CDS.1055	MP37.CDS.1120	MP38.CDS.1176	MP1.CDS.1128	MP2.CDS.1127	mp39.CDS.1066
cluster231	S	AttF component of AttEFGH ABC transport system / AttG component of AttEFGH ABC transport system	MP_ATCC.CDS.192	MP36.CDS.1056	MP37.CDS.1121	MP38.CDS.1177	MP1.CDS.1129	MP2.CDS.1128	mp39.CDS.1067
cluster2067	S	AttH component of AttEFGH ABC transport system	MP_ATCC.CDS.2326	MP36.CDS.1057	MP37.CDS.1122	MP38.CDS.1178	MP1.CDS.1130	MP2.CDS.1129	mp39.CDS.1068
cluster2814	O	Bacterial proteasome-activating AAA-ATPase (PAN)	MP_ATCC.CDS.3230	MP36.CDS.2311	MP37.CDS.2341	MP38.CDS.2420	MP1.CDS.2375	MP2.CDS.2372	mp39.CDS.2333
cluster3471	P	Bacterioferritin (BFR)	MP_ATCC.CDS.3981	MP36.CDS.2045	MP37.CDS.2081	MP38.CDS.2163	MP1.CDS.2110	MP2.CDS.2108	mp39.CDS.2040
cluster3216	P	Basic proline-rich protein	MP_ATCC.CDS.3689	MP36.CDS.1336	MP37.CDS.1398	MP38.CDS.1457	MP1.CDS.1406	MP2.CDS.1402	mp39.CDS.1343
cluster718	P	Basic proline-rich protein	MP_ATCC.CDS.769	MP36.CDS.558	MP37.CDS.617	MP38.CDS.614	MP1.CDS.622	MP2.CDS.619	mp39.CDS.559
cluster3033	G	Beta-carotene ketolase	MP_ATCC.CDS.3489	MP36.CDS.960	MP37.CDS.1025	MP38.CDS.1025	MP1.CDS.1031	MP2.CDS.1032	mp39.CDS.965
cluster2289	G	Beta-glucosidase (EC 3.2.1.21)	MP_ATCC.CDS.2606	MP36.CDS.191	MP37.CDS.245	MP38.CDS.245	MP1.CDS.253	MP2.CDS.252	mp39.CDS.187
cluster2338	I	Beta-hexosaminidase (EC 3.2.1.52)	MP_ATCC.CDS.2661	MP36.CDS.246	MP37.CDS.299	MP38.CDS.301	MP1.CDS.307	MP2.CDS.307	mp39.CDS.242
cluster2017	I	Beta-ketoadipate enol-lactone hydrolase (EC 3.1.1.24)	MP_ATCC.CDS.2266	MP36.CDS.3481	MP37.CDS.3510	MP38.CDS.3536	MP1.CDS.3532	MP2.CDS.3349	mp39.CDS.3501
cluster1121	G	Beta-lactamase	MP_ATCC.CDS.1219	MP36.CDS.4129	MP37.CDS.4140	MP38.CDS.4161	MP1.CDS.4172	MP2.CDS.4182	mp39.CDS.2317
cluster185	G	Beta-lactamase (EC 3.5.2.6)	MP_ATCC.CDS.139	MP36.CDS.3935	MP37.CDS.3953	MP38.CDS.3972	MP1.CDS.4292	MP2.CDS.2895	mp39.CDS.3940
cluster1948	I	Beta-lactamase (EC 3.5.2.6)	MP_ATCC.CDS.2189	MP36.CDS.1877	MP37.CDS.1913	MP38.CDS.1995	MP1.CDS.1939	MP2.CDS.1917	mp39.CDS.1878
cluster3043	I	Beta-lactamase (EC 3.5.2.6)	MP_ATCC.CDS.3499	MP36.CDS.970	MP37.CDS.1035	MP38.CDS.1035	MP1.CDS.1041	MP2.CDS.1042	mp39.CDS.975
cluster2853	G	Beta-lactamase class A	MP_ATCC.CDS.3278	MP36.CDS.2262	MP37.CDS.2292	MP38.CDS.2376	MP1.CDS.2326	MP2.CDS.2323	mp39.CDS.2261
cluster1941	S	Beta-lactamase class C and other penicillin binding proteins	MP_ATCC.CDS.2182	MP36.CDS.1870	MP37.CDS.1906	MP38.CDS.1988	MP1.CDS.1932	MP2.CDS.1910	mp39.CDS.1871
cluster2477	S	Beta-lactamase class C and other penicillin binding proteins	MP_ATCC.CDS.2845	MP36.CDS.1489	MP37.CDS.1548	MP38.CDS.1618	MP1.CDS.1559	MP2.CDS.1551	mp39.CDS.1498
cluster341	S	Beta-lactamase class C and other penicillin binding proteins	MP_ATCC.CDS.326	MP36.CDS.2465	MP37.CDS.2496	MP38.CDS.2575	MP1.CDS.2529	MP2.CDS.2525	mp39.CDS.2490
cluster2091	S	Bile acid 7-alpha dehydratase BaiE (EC 4.2.1.106)	MP_ATCC.CDS.2355	MP36.CDS.322	MP37.CDS.377	MP38.CDS.378	MP1.CDS.385	MP2.CDS.383	mp39.CDS.321
cluster1118	C	Biosynthetic Aromatic amino acid aminotransferase beta (EC 2.6.1.57)	MP_ATCC.CDS.1216	MP36.CDS.4126	MP37.CDS.4137	MP38.CDS.4158	MP1.CDS.4169	MP2.CDS.4179	mp39.CDS.2314
cluster1703	E	Biotin carboxyl carrier protein	MP_ATCC.CDS.1918	MP36.CDS.3538	MP37.CDS.3570	MP38.CDS.3592	MP1.CDS.3590	MP2.CDS.3291	mp39.CDS.3557
cluster1766	E	Biotin carboxylase of acetyl-CoA carboxylase (EC 6.3.4.14) / Biotin carboxyl carrier protein of acetyl-CoA carboxylase	MP_ATCC.CDS.1986	MP36.CDS.3607	MP37.CDS.3637	MP38.CDS.3659	MP1.CDS.3657	MP2.CDS.3222	mp39.CDS.3625
cluster2408	E	Biotin sulfoxide reductase (EC 1.-.-.-) / Free methionine-(S)-sulfoxide reductase	MP_ATCC.CDS.2768	MP36.CDS.1565	MP37.CDS.1624	MP38.CDS.1694	MP1.CDS.1636	MP2.CDS.1645	mp39.CDS.1576
cluster1811	E	Biotin synthase (EC 2.8.1.6)	MP_ATCC.CDS.2035	MP36.CDS.1718	MP37.CDS.1760	MP38.CDS.1840	MP1.CDS.1782	MP2.CDS.1759	mp39.CDS.1720
cluster1761	E	Biotin--protein ligase (EC 6.3.4.9)(EC 6.3.4.10)(EC 6.3.4.11)(EC 6.3.4.15)	MP_ATCC.CDS.1979	MP36.CDS.3601	MP37.CDS.3631	MP38.CDS.3653	MP1.CDS.3651	MP2.CDS.3228	mp39.CDS.3619
cluster3188	E	Bis(5'-nucleosyl)-tetraphosphatase (asymmetrical) (EC 3.6.1.17)	MP_ATCC.CDS.3660	MP36.CDS.1367	MP37.CDS.1427	MP38.CDS.1488	MP1.CDS.1438	MP2.CDS.1433	mp39.CDS.1374
cluster3064	S	BRAMP	MP_ATCC.CDS.3521	MP36.CDS.993	MP37.CDS.1057	MP38.CDS.1057	MP1.CDS.1063	MP2.CDS.1063	mp39.CDS.998
cluster1471	C	Branched-chain alpha-keto acid dehydrogenase, E1 component, alpha subunit (EC 1.2.4.4)	MP_ATCC.CDS.1655	MP36.CDS.2736	MP37.CDS.2768	MP38.CDS.2845	MP1.CDS.2797	MP2.CDS.2791	mp39.CDS.2764
cluster1470	C	Branched-chain alpha-keto acid dehydrogenase, E1 component, beta subunit (EC 1.2.4.4)	MP_ATCC.CDS.1654	MP36.CDS.2735	MP37.CDS.2767	MP38.CDS.2844	MP1.CDS.2796	MP2.CDS.2790	mp39.CDS.2763
cluster388	C	Branched-chain amino acid aminotransferase (EC 2.6.1.42)	MP_ATCC.CDS.379	MP36.CDS.2413	MP37.CDS.2443	MP38.CDS.2523	MP1.CDS.2477	MP2.CDS.2473	mp39.CDS.2437
cluster152	I	Butyryl-CoA dehydrogenase (EC 1.3.8.1)	MP_ATCC.CDS.103	MP36.CDS.3900	MP37.CDS.3917	MP38.CDS.3936	MP1.CDS.3949	MP2.CDS.2929	mp39.CDS.3905
cluster154	I	Butyryl-CoA dehydrogenase (EC 1.3.8.1)	MP_ATCC.CDS.105	MP36.CDS.3902	MP37.CDS.3919	MP38.CDS.3938	MP1.CDS.3951	MP2.CDS.2927	mp39.CDS.3907
cluster2260	I	Butyryl-CoA dehydrogenase (EC 1.3.8.1)	MP_ATCC.CDS.2572	MP36.CDS.156	MP37.CDS.211	MP38.CDS.211	MP1.CDS.219	MP2.CDS.218	mp39.CDS.153
cluster1982	I	Butyryl-CoA dehydrogenase (EC 1.3.99.2)	MP_ATCC.CDS.2227	MP36.CDS.2114	MP37.CDS.2149	MP38.CDS.2230	MP1.CDS.2178	MP2.CDS.2177	mp39.CDS.2110
cluster1983	I	Butyryl-CoA dehydrogenase (EC 1.3.99.2)	MP_ATCC.CDS.2228	MP36.CDS.2113	MP37.CDS.2148	MP38.CDS.2229	MP1.CDS.2177	MP2.CDS.2176	mp39.CDS.2109
cluster2632	I	Butyryl-CoA dehydrogenase (EC 1.3.99.2)	MP_ATCC.CDS.3023	MP36.CDS.3353	MP37.CDS.3384	MP38.CDS.3413	MP1.CDS.3406	MP2.CDS.3474	mp39.CDS.3375
cluster3412	I	C-5 sterol desaturase (EC 1.3.-.-)	MP_ATCC.CDS.3918	MP36.CDS.1976	MP37.CDS.2013	MP38.CDS.2098	MP1.CDS.2043	MP2.CDS.2024	mp39.CDS.1976
cluster1953	E	C4-dicarboxylate transporter/malic acid transport protein	MP_ATCC.CDS.2194	MP36.CDS.1882	MP37.CDS.1919	MP38.CDS.2000	MP1.CDS.1944	MP2.CDS.1923	mp39.CDS.1883
cluster3945	E	CAIB/BAIF family protein		MP36.CDS.2033			MP1.CDS.2098	MP2.CDS.2096	mp39.CDS.2089
cluster1829	P	Calcium/proton antiporter	MP_ATCC.CDS.2053	MP36.CDS.1736	MP37.CDS.1778	MP38.CDS.1858	MP1.CDS.1800	MP2.CDS.1777	mp39.CDS.1738
cluster1021	T	cAMP-binding proteins - catabolite gene activator and regulatory subunit of cAMP-dependent protein kinases	MP_ATCC.CDS.1110	MP36.CDS.4017	MP37.CDS.4031	MP38.CDS.4050	MP1.CDS.4061	MP2.CDS.4070	mp39.CDS.4020
cluster276	I	Candidate substrate-specific domain of ECF transporters in Mycobacteria / Duplicated ATPase component of energizing module of predicted ECF transporter in Mycobacteria	MP_ATCC.CDS.250	MP36.CDS.2542	MP37.CDS.2573	MP38.CDS.2648	MP1.CDS.2602	MP2.CDS.2598	mp39.CDS.2564
cluster764	M	Capsule biosynthesis protein CapA	MP_ATCC.CDS.820	MP36.CDS.608	MP37.CDS.667	MP38.CDS.665	MP1.CDS.673	MP2.CDS.671	mp39.CDS.611
cluster2465	I	Carbamoyl-phosphate synthase large chain (EC 6.3.5.5)	MP_ATCC.CDS.2831	MP36.CDS.1504	MP37.CDS.1562	MP38.CDS.1632	MP1.CDS.1573	MP2.CDS.1565	mp39.CDS.1512
cluster4151	I	Carbamoyl-phosphate synthase large chain (EC 6.3.5.5)		MP36.CDS.1503
cluster2466	I	Carbamoyl-phosphate synthase small chain (EC 6.3.5.5)	MP_ATCC.CDS.2832	MP36.CDS.1502	MP37.CDS.1561	MP38.CDS.1631	MP1.CDS.1572	MP2.CDS.1564	mp39.CDS.1511
cluster3625	T	Carbon monoxide dehydrogenase form I, large chain (EC 1.2.99.2)	MP_ATCC.CDS.4158	MP36.CDS.386	MP37.CDS.442	MP38.CDS.443	MP1.CDS.450	MP2.CDS.447	mp39.CDS.386
cluster3626	T	Carbon monoxide dehydrogenase form I, large chain (EC 1.2.99.2)	MP_ATCC.CDS.4159	MP36.CDS.385	MP37.CDS.441	MP38.CDS.442	MP1.CDS.449	MP2.CDS.446	mp39.CDS.385
cluster3623	T	Carbon monoxide dehydrogenase medium chain (EC 1.2.99.2)	MP_ATCC.CDS.4156	MP36.CDS.388	MP37.CDS.444	MP38.CDS.445	MP1.CDS.452	MP2.CDS.449	mp39.CDS.388
cluster3624	T	Carbon monoxide dehydrogenase small chain (EC 1.2.99.2)	MP_ATCC.CDS.4157	MP36.CDS.387	MP37.CDS.443	MP38.CDS.444	MP1.CDS.451	MP2.CDS.448	mp39.CDS.387
cluster3629	T	Carbon monoxide oxidation accessory protein CoxD	MP_ATCC.CDS.4162	MP36.CDS.382	MP37.CDS.438	MP38.CDS.439	MP1.CDS.446	MP2.CDS.443	mp39.CDS.382
cluster3631	T	Carbon monoxide oxidation accessory protein CoxE	MP_ATCC.CDS.4164	MP36.CDS.380	MP37.CDS.436	MP38.CDS.437	MP1.CDS.444	MP2.CDS.441	mp39.CDS.380
cluster3630	T	Carbon monoxide oxidation accessory protein CoxG	MP_ATCC.CDS.4163	MP36.CDS.381	MP37.CDS.437	MP38.CDS.438	MP1.CDS.445	MP2.CDS.442	mp39.CDS.381
cluster2634	T	Carbon starvation protein A	MP_ATCC.CDS.3025	MP36.CDS.3355	MP37.CDS.3386	MP38.CDS.3415	MP1.CDS.3408	MP2.CDS.3472	mp39.CDS.3377
cluster1755	O	Carbonic anhydrase (EC 4.2.1.1)	MP_ATCC.CDS.1973	MP36.CDS.3595	MP37.CDS.3625	MP38.CDS.3647	MP1.CDS.3645	MP2.CDS.3234	mp39.CDS.3613
cluster180	O	Carbonic anhydrase (EC 4.2.1.1)	MP_ATCC.CDS.134	MP36.CDS.3929	MP37.CDS.3947	MP38.CDS.3965	MP1.CDS.3979	MP2.CDS.2900	mp39.CDS.3935
cluster3167	O	Carbonic anhydrase (EC 4.2.1.1)	MP_ATCC.CDS.3635	MP36.CDS.1391	MP37.CDS.1455	MP38.CDS.1514	MP1.CDS.1462	MP2.CDS.1457	mp39.CDS.1402
cluster424	O	carbonic anhydrase, family 3	MP_ATCC.CDS.421	MP36.CDS.3861	MP37.CDS.3878	MP38.CDS.3897	MP1.CDS.3910	MP2.CDS.2968	mp39.CDS.3866
cluster1251	I	Carboxylesterase, type B	MP_ATCC.CDS.1379	MP36.CDS.1196	MP37.CDS.1258	MP38.CDS.1315	MP1.CDS.1266	MP2.CDS.1263	mp39.CDS.1204
cluster1252	I	Carboxylesterase, type B	MP_ATCC.CDS.1380	MP36.CDS.1197	MP37.CDS.1259	MP38.CDS.1316	MP1.CDS.1267	MP2.CDS.1264	mp39.CDS.1205
cluster109	R	Carboxymuconolactone decarboxylase	MP_ATCC.CDS.45	MP36.CDS.1672	MP37.CDS.1715	MP38.CDS.1793	MP1.CDS.1737	MP2.CDS.1713	mp39.CDS.1674
cluster175	K	CarD-like transcriptional regulator	MP_ATCC.CDS.129	MP36.CDS.3924	MP37.CDS.3942	MP38.CDS.3960	MP1.CDS.3974	MP2.CDS.2905	mp39.CDS.3930
cluster4921	P	Catalase (EC 1.11.1.6)							mp39.CDS.4307
cluster3505	P	Catalase (EC 1.11.1.6) / Peroxidase (EC 1.11.1.7)	MP_ATCC.CDS.4019	MP36.CDS.2084	MP37.CDS.2120	MP38.CDS.2201	MP1.CDS.2148	MP2.CDS.2148	mp39.CDS.2080
cluster2901	P	Cation-transporting ATPase, E1-E2 family	MP_ATCC.CDS.3337	MP36.CDS.2174	MP37.CDS.2205	MP38.CDS.2287	MP1.CDS.2237	MP2.CDS.2236	mp39.CDS.2166
cluster3044	P	Cation-transporting ATPase, E1-E2 family	MP_ATCC.CDS.3500	MP36.CDS.971	MP37.CDS.1036	MP38.CDS.1036	MP1.CDS.1042	MP2.CDS.1043	mp39.CDS.976
cluster392	C	CblZ, a non-orthologous displasment for Alpha-ribazole-5'-phosphate phosphatase	MP_ATCC.CDS.383	MP36.CDS.2408	MP37.CDS.2439	MP38.CDS.2518	MP1.CDS.2472	MP2.CDS.2468	mp39.CDS.2432
cluster5031	C	CblZ, a non-orthologous displasment for Alpha-ribazole-5'-phosphate phosphatase				MP38.CDS.2519
cluster2184	C	CBS domain protein	MP_ATCC.CDS.2479	MP36.CDS.2875	MP37.CDS.2908	MP38.CDS.2928	MP1.CDS.2936	MP2.CDS.3955	mp39.CDS.2900
cluster455	S	CBS domain protein	MP_ATCC.CDS.460	MP36.CDS.2633	MP37.CDS.2664	MP38.CDS.2740	MP1.CDS.2693	MP2.CDS.2688	mp39.CDS.2657
cluster716	O	Ccs1/ResB-related putative cytochrome C-type biogenesis protein	MP_ATCC.CDS.767	MP36.CDS.556	MP37.CDS.615	MP38.CDS.612	MP1.CDS.620	MP2.CDS.617	mp39.CDS.557
cluster316	I	CDP-diacylglycerol pyrophosphatase (EC 3.6.1.26)	MP_ATCC.CDS.296	MP36.CDS.2496	MP37.CDS.2527	MP38.CDS.2603	MP1.CDS.2558	MP2.CDS.2554	mp39.CDS.2520
cluster2684	I	CDP-diacylglycerol--glycerol-3-phosphate 3-phosphatidyltransferase (EC 2.7.8.5)	MP_ATCC.CDS.3085	MP36.CDS.2858	MP37.CDS.2892	MP38.CDS.1166	MP1.CDS.2922	MP2.CDS.3971	mp39.CDS.2885
cluster3420	I	CDP-diacylglycerol--glycerol-3-phosphate 3-phosphatidyltransferase (EC 2.7.8.5)	MP_ATCC.CDS.3926	MP36.CDS.1986	MP37.CDS.2023	MP38.CDS.2108	MP1.CDS.2052	MP2.CDS.2050	mp39.CDS.1986
cluster3772	I	CDP-diacylglycerol--glycerol-3-phosphate 3-phosphatidyltransferase (EC 2.7.8.5)	MP_ATCC.CDS.678	MP36.CDS.3004	MP37.CDS.3034	MP38.CDS.3057	MP1.CDS.3061	MP2.CDS.3824
cluster3568	I	CDP-diacylglycerol--serine O-phosphatidyltransferase (EC 2.7.8.8)	MP_ATCC.CDS.4089	MP36.CDS.453	MP37.CDS.510	MP38.CDS.509	MP1.CDS.516	MP2.CDS.513	mp39.CDS.454
cluster382	D	Cell division inhibitor	MP_ATCC.CDS.373	MP36.CDS.2419	MP37.CDS.2449	MP38.CDS.2529	MP1.CDS.2483	MP2.CDS.2479	mp39.CDS.2443
cluster2064	D	Cell division initiation protein	MP_ATCC.CDS.2323	MP36.CDS.3208	MP37.CDS.3237	MP38.CDS.3265	MP1.CDS.3265	MP2.CDS.3618	mp39.CDS.3222
cluster2501	D	Cell division protein DivIC (FtsB), stabilizes FtsL against RasP cleavage	MP_ATCC.CDS.2875	MP36.CDS.1097	MP37.CDS.1163	MP38.CDS.1220	MP1.CDS.1171	MP2.CDS.1169	mp39.CDS.1109
cluster200	D	Cell division protein FtsH (EC 3.4.24.-)	MP_ATCC.CDS.155	MP36.CDS.3952	MP37.CDS.3969	MP38.CDS.3988	MP1.CDS.3996	MP2.CDS.4008	mp39.CDS.3957
cluster3569	D	Cell division protein FtsH (EC 3.4.24.-)	MP_ATCC.CDS.4090	MP36.CDS.452	MP37.CDS.509	MP38.CDS.508	MP1.CDS.515	MP2.CDS.512	mp39.CDS.453
cluster1540	D	Cell division protein FtsI [Peptidoglycan synthetase] (EC 2.4.1.129)	MP_ATCC.CDS.1730	MP36.CDS.3140	MP37.CDS.3169	MP38.CDS.3196	MP1.CDS.3197	MP2.CDS.3687	mp39.CDS.3154
cluster3708	D	Cell division protein FtsI [Peptidoglycan synthetase] (EC 2.4.1.129)	MP_ATCC.CDS.4251	MP36.CDS.2365	MP37.CDS.2395	MP38.CDS.2474	MP1.CDS.2429	MP2.CDS.2425	mp39.CDS.2387
cluster3799	D	Cell division protein FtsI [Peptidoglycan synthetase] (EC 2.4.1.129)	MP_ATCC.CDS.1511	MP36.CDS.4311	MP37.CDS.56	MP38.CDS.55	MP1.CDS.65	MP2.CDS.65
cluster3709	D	Cell division protein FtsL / proline rich membrane protein	MP_ATCC.CDS.4252	MP36.CDS.2366	MP37.CDS.2396	MP38.CDS.2475	MP1.CDS.2430	MP2.CDS.2426	mp39.CDS.2388
cluster3696	D	Cell division protein FtsQ	MP_ATCC.CDS.4238	MP36.CDS.2352	MP37.CDS.2382	MP38.CDS.2461	MP1.CDS.2416	MP2.CDS.2412	mp39.CDS.2374
cluster3699	D	Cell division protein FtsW	MP_ATCC.CDS.4241	MP36.CDS.2355	MP37.CDS.2385	MP38.CDS.2464	MP1.CDS.2419	MP2.CDS.2415	mp39.CDS.2377
cluster3800	D	Cell division protein FtsW	MP_ATCC.CDS.1512	MP36.CDS.4312	MP37.CDS.57	MP38.CDS.56	MP1.CDS.66	MP2.CDS.66
cluster2671	D	Cell division protein FtsX	MP_ATCC.CDS.3066	MP36.CDS.3398	MP37.CDS.3427	MP38.CDS.3456	MP1.CDS.3449	MP2.CDS.3430	mp39.CDS.3420
cluster3695	D	Cell division protein FtsZ (EC 3.4.24.-)	MP_ATCC.CDS.4237	MP36.CDS.2351	MP37.CDS.2381	MP38.CDS.2460	MP1.CDS.2415	MP2.CDS.2411	mp39.CDS.2373
cluster3711	D	Cell division protein MraZ	MP_ATCC.CDS.4254	MP36.CDS.2368	MP37.CDS.2398	MP38.CDS.2477	MP1.CDS.2432	MP2.CDS.2428	mp39.CDS.2390
cluster2672	D	Cell division transporter, ATP-binding protein FtsE (TC 3.A.5.1.1)	MP_ATCC.CDS.3067	MP36.CDS.3399	MP37.CDS.3428	MP38.CDS.3457	MP1.CDS.3450	MP2.CDS.3429	mp39.CDS.3421
cluster1441	D	Cell division trigger factor (EC 5.2.1.8)	MP_ATCC.CDS.1621	MP36.CDS.2700	MP37.CDS.2731	MP38.CDS.2808	MP1.CDS.2759	MP2.CDS.2755	mp39.CDS.2725
cluster1613	K	Cell envelope-associated transcriptional attenuator LytR-CpsA-Psr, subfamily A1 (as in PMID19099556)	MP_ATCC.CDS.1811	MP36.CDS.3822	MP37.CDS.3838	MP38.CDS.3859	MP1.CDS.3869	MP2.CDS.3011	mp39.CDS.3824
cluster1749	K	Cell envelope-associated transcriptional attenuator LytR-CpsA-Psr, subfamily A1 (as in PMID19099556)	MP_ATCC.CDS.1967	MP36.CDS.3589	MP37.CDS.3619	MP38.CDS.3641	MP1.CDS.3639	MP2.CDS.3240	mp39.CDS.3607
cluster245	K	Cell envelope-associated transcriptional attenuator LytR-CpsA-Psr, subfamily A1 (as in PMID19099556)	MP_ATCC.CDS.208	MP36.CDS.4197	MP37.CDS.4208	MP38.CDS.4228	MP1.CDS.4238	MP2.CDS.4249	mp39.CDS.4174
cluster2962	K	Cell envelope-associated transcriptional attenuator LytR-CpsA-Psr, subfamily A1 (as in PMID19099556)	MP_ATCC.CDS.3404	MP36.CDS.875	MP37.CDS.937	MP38.CDS.940	MP1.CDS.943	MP2.CDS.945	mp39.CDS.880
cluster1529	M	Cell surface lipoprotein MPT83 precursor	MP_ATCC.CDS.1716	MP36.CDS.3154	MP37.CDS.3183	MP38.CDS.3210	MP1.CDS.3211	MP2.CDS.3673	mp39.CDS.3168
cluster1531	M	Cell surface lipoprotein MPT83 precursor	MP_ATCC.CDS.1720	MP36.CDS.3150	MP37.CDS.3179	MP38.CDS.3206	MP1.CDS.3207	MP2.CDS.3677	mp39.CDS.3165
cluster371	S	CHAD domain containing protein	MP_ATCC.CDS.360	MP36.CDS.2431	MP37.CDS.2461	MP38.CDS.2541	MP1.CDS.2495	MP2.CDS.2491	mp39.CDS.2456
cluster23	G	Chalcone synthase (EC 2.3.1.74)	MP_ATCC.CDS.2113;MP_ATCC.CDS.2118	MP36.CDS.1795;MP36.CDS.1802	MP37.CDS.1835;MP37.CDS.1840	MP38.CDS.1916;MP38.CDS.1921	MP1.CDS.1859;MP1.CDS.1864	MP2.CDS.1836;MP2.CDS.1841	mp39.CDS.1795;mp39.CDS.1802
cluster2474	G	Chalcone synthase (EC 2.3.1.74)	MP_ATCC.CDS.2841	MP36.CDS.1493	MP37.CDS.1552	MP38.CDS.1622	MP1.CDS.1563	MP2.CDS.1555	mp39.CDS.1502
cluster2133	O	Chaperone protein DnaJ	MP_ATCC.CDS.2404	MP36.CDS.364	MP37.CDS.420	MP38.CDS.421	MP1.CDS.428	MP2.CDS.425	mp39.CDS.363
cluster491	O	Chaperone protein DnaJ	MP_ATCC.CDS.497	MP36.CDS.2594	MP37.CDS.2626	MP38.CDS.2701	MP1.CDS.2655	MP2.CDS.2650	mp39.CDS.2618
cluster2131	O	Chaperone protein DnaK	MP_ATCC.CDS.2402	MP36.CDS.362	MP37.CDS.418	MP38.CDS.419	MP1.CDS.426	MP2.CDS.423	mp39.CDS.361
cluster307	O	Chaperone protein HtpG	MP_ATCC.CDS.287	MP36.CDS.2506	MP37.CDS.2536	MP38.CDS.2612	MP1.CDS.2567	MP2.CDS.2563	mp39.CDS.2529
cluster4918	U	Chemotaxis protein methyltransferase CheR (EC 2.1.1.80)							mp39.CDS.4302
cluster5202	U	Chimeric AFGP/trypsinogen-like serine protease						MP2.CDS.1656
cluster1556	S	ChlI component of cobalt chelatase involved in B12 biosynthesis / ChlD component of cobalt chelatase involved in B12 biosynthesis	MP_ATCC.CDS.1747	MP36.CDS.3122	MP37.CDS.3152	MP38.CDS.3179	MP1.CDS.3180	MP2.CDS.3705	mp39.CDS.3137
cluster2248	E	Chloride channel protein	MP_ATCC.CDS.2559	MP36.CDS.142	MP37.CDS.198	MP38.CDS.198	MP1.CDS.206	MP2.CDS.205	mp39.CDS.139
cluster2545	E	Cholesterol oxidase (EC 1.1.3.6)	MP_ATCC.CDS.2926	MP36.CDS.3737	MP37.CDS.3767	MP38.CDS.3788	MP1.CDS.3786	MP2.CDS.3092	mp39.CDS.3757
cluster3172	E	Choline dehydrogenase (EC 1.1.99.1)	MP_ATCC.CDS.3641	MP36.CDS.1385	MP37.CDS.1449	MP38.CDS.1508	MP1.CDS.1456	MP2.CDS.1451	mp39.CDS.1396
cluster2646	U	Choline-sulfatase (EC 3.1.6.6)	MP_ATCC.CDS.3039	MP36.CDS.3370	MP37.CDS.3401	MP38.CDS.3430	MP1.CDS.3423	MP2.CDS.3457	mp39.CDS.3393
cluster5675	U	Choline-sulfatase (EC 3.1.6.6)							mp39.CDS.3392
cluster3086	H	Chorismate mutase I (EC 5.4.99.5)	MP_ATCC.CDS.3544	MP36.CDS.1017	MP37.CDS.1081	MP38.CDS.1081	MP1.CDS.1087	MP2.CDS.1087	mp39.CDS.1023
cluster2750	H	Chorismate synthase (EC 4.2.3.5)	MP_ATCC.CDS.3160	MP36.CDS.2783	MP37.CDS.2817	MP38.CDS.2895	MP1.CDS.2846	MP2.CDS.2839	mp39.CDS.2813
cluster2146	H	Chorismate--pyruvate lyase (EC 4.1.3.40)	MP_ATCC.CDS.2429	MP36.CDS.3233	MP37.CDS.3262	MP38.CDS.3290	MP1.CDS.3288	MP2.CDS.3595	mp39.CDS.3249
cluster1338	L	Chromosomal replication initiator protein DnaA	MP_ATCC.CDS.1492	MP36.CDS.4293	MP37.CDS.38	MP38.CDS.38	MP1.CDS.47	MP2.CDS.47	mp39.CDS.4259
cluster4244	H	partitioning protein ParA							mp39.CDS.4312
cluster1333	H	partitioning protein ParA / Sporulation initiation inhibitor protein Soj	MP_ATCC.CDS.1486	MP36.CDS.4287	MP37.CDS.32	MP38.CDS.32	MP1.CDS.41	MP2.CDS.41	mp39.CDS.4253
cluster1695	S	partitioning protein ParA / Sporulation initiation inhibitor protein Soj	MP_ATCC.CDS.1909	MP36.CDS.3529	MP37.CDS.3559	MP38.CDS.3583	MP1.CDS.3581	MP2.CDS.3300	mp39.CDS.3548
cluster1332	S	partitioning protein ParB / Stage 0 sporulation protein J	MP_ATCC.CDS.1485	MP36.CDS.4286	MP37.CDS.31	MP38.CDS.31	MP1.CDS.40	MP2.CDS.40	mp39.CDS.4252
cluster261	S	partition protein smc	MP_ATCC.CDS.231	MP36.CDS.3202	MP37.CDS.3231	MP38.CDS.3259	MP1.CDS.3259	MP2.CDS.3624	mp39.CDS.3216
cluster2615	I	Cinnamyl alcohol dehydrogenase/reductase (EC 1.1.1.195) @ Alcohol dehydrogenase (EC 1.1.1.1)	MP_ATCC.CDS.3005	MP36.CDS.3335	MP37.CDS.3367	MP38.CDS.3395	MP1.CDS.3388	MP2.CDS.3492	mp39.CDS.3356
cluster3025	C	Citrate synthase (si) (EC 2.3.3.1)	MP_ATCC.CDS.3480	MP36.CDS.951	MP37.CDS.1016	MP38.CDS.1016	MP1.CDS.1022	MP2.CDS.1023	mp39.CDS.956
cluster3032	G	Citrate synthase (si) (EC 2.3.3.1)	MP_ATCC.CDS.3488	MP36.CDS.959	MP37.CDS.1024	MP38.CDS.1024	MP1.CDS.1030	MP2.CDS.1031	mp39.CDS.964
cluster1557	H	Cob(I)alamin adenosyltransferase (EC 2.5.1.17) @ Cob(I)alamin adenosyltransferase (EC 2.5.1.17), clustered with cobalamin synthesis	MP_ATCC.CDS.1748	MP36.CDS.3121	MP37.CDS.3151	MP38.CDS.3178	MP1.CDS.3179	MP2.CDS.3706	mp39.CDS.3136
cluster2095	H	Cobalamin biosynthesis protein BluB @ 5,6-dimethylbenzimidazole synthase, flavin destructase family	MP_ATCC.CDS.2359	MP36.CDS.318	MP37.CDS.373	MP38.CDS.374	MP1.CDS.381	MP2.CDS.379	mp39.CDS.317
cluster2857	H	Cobalamin biosynthesis protein CobG	MP_ATCC.CDS.3282	MP36.CDS.2258	MP37.CDS.2288	MP38.CDS.2372	MP1.CDS.2322	MP2.CDS.2319	mp39.CDS.2257
cluster390	H	Cobalamin synthase (EC 2.7.8.26)	MP_ATCC.CDS.381	MP36.CDS.2411	MP37.CDS.2441	MP38.CDS.2521	MP1.CDS.2475	MP2.CDS.2471	mp39.CDS.2435
cluster2855	P	Cobalt-precorrin-2 C20-methyltransferase (EC 2.1.1.130) / Cobalt-precorrin-3b C17-methyltransferase (EC 2.1.1.131)	MP_ATCC.CDS.3280	MP36.CDS.2260	MP37.CDS.2290	MP38.CDS.2374	MP1.CDS.2324	MP2.CDS.2321	mp39.CDS.2259
cluster2850	P	Cobalt-precorrin-4 C11-methyltransferase (EC 2.1.1.133)	MP_ATCC.CDS.3275	MP36.CDS.2265	MP37.CDS.2295	MP38.CDS.2379	MP1.CDS.2329	MP2.CDS.2326	mp39.CDS.2264
cluster2851	P	Cobalt-precorrin-6A reductase (EC 1.3.1.54)	MP_ATCC.CDS.3276	MP36.CDS.2264	MP37.CDS.2294	MP38.CDS.2378	MP1.CDS.2328	MP2.CDS.2325	mp39.CDS.2263
cluster2848	P	Cobalt-precorrin-7 (C5)-methyltransferase (EC 2.1.1.289) / Cobalt-precorrin-6B C15-methyltransferase [decarboxylating] (EC 2.1.1.196)	MP_ATCC.CDS.3273	MP36.CDS.2267	MP37.CDS.2297	MP38.CDS.2381	MP1.CDS.2331	MP2.CDS.2328	mp39.CDS.2266
cluster2849	P	Cobalt-precorrin-7 (C5)-methyltransferase (EC 2.1.1.289) / Cobalt-precorrin-6B C15-methyltransferase [decarboxylating] (EC 2.1.1.196)	MP_ATCC.CDS.3274	MP36.CDS.2266	MP37.CDS.2296	MP38.CDS.2380	MP1.CDS.2330	MP2.CDS.2327	mp39.CDS.2265
cluster2856	P	Cobalt-precorrin-8x methylmutase (EC 5.4.1.2)	MP_ATCC.CDS.3281	MP36.CDS.2259	MP37.CDS.2289	MP38.CDS.2373	MP1.CDS.2323	MP2.CDS.2320	mp39.CDS.2258
cluster3136	P	Cobalt-zinc-cadmium resistance protein	MP_ATCC.CDS.3602	MP36.CDS.2211	MP37.CDS.2243	MP38.CDS.2325	MP1.CDS.2274	MP2.CDS.2273	mp39.CDS.2209
cluster1088	P	Cobalt(II) binding transcription repressor, nmtR	MP_ATCC.CDS.1186	MP36.CDS.4096	MP37.CDS.4107	MP38.CDS.4128	MP1.CDS.4139	MP2.CDS.4149	mp39.CDS.4098
cluster2860	S	CobN component of cobalt chelatase involved in B12 biosynthesis	MP_ATCC.CDS.3285	MP36.CDS.2255	MP37.CDS.2285	MP38.CDS.2369	MP1.CDS.2319	MP2.CDS.2316	mp39.CDS.2254
cluster2355	P	Cobyric acid synthase (EC 6.3.5.10)	MP_ATCC.CDS.2679	MP36.CDS.264	MP37.CDS.317	MP38.CDS.319	MP1.CDS.326	MP2.CDS.325	mp39.CDS.260
cluster1558	P	Cobyrinic acid a,c-diamide synthetase (EC 6.3.5.11)	MP_ATCC.CDS.1749	MP36.CDS.3120	MP37.CDS.3150	MP38.CDS.3177	MP1.CDS.3178	MP2.CDS.3707	mp39.CDS.3135
cluster3236	K	Cocaine esterase (EC 3.1.1.-)	MP_ATCC.CDS.3709	MP36.CDS.1316	MP37.CDS.1378	MP38.CDS.1436	MP1.CDS.1386	MP2.CDS.1382	mp39.CDS.1323
cluster1744	H	Coenzyme F420-0:L-glutamate ligase (EC 6.3.2.31) @ F420-1:L-glutamate ligase (EC 6.3.2.34) / Nitroreductase family protein Rcas_3978	MP_ATCC.CDS.1961	MP36.CDS.3583	MP37.CDS.3613	MP38.CDS.3635	MP1.CDS.3633	MP2.CDS.3246	mp39.CDS.3601
cluster2590	H	Coenzyme F420-dependent N5,N10-methylene tetrahydromethanopterin reductase and related flavin-dependent oxidoreductases	MP_ATCC.CDS.2977	MP36.CDS.3801	MP37.CDS.3819	MP38.CDS.3849	MP1.CDS.3850	MP2.CDS.3030	mp39.CDS.3805
cluster982	H	Coenzyme F420-dependent N5,N10-methylene tetrahydromethanopterin reductase and related flavin-dependent oxidoreductases	MP_ATCC.CDS.1063	MP36.CDS.846	MP37.CDS.909	MP38.CDS.912	MP1.CDS.914	MP2.CDS.916	mp39.CDS.852
cluster429	H	Coenzyme F420-dependent oxidoreductase	MP_ATCC.CDS.426	MP36.CDS.3856	MP37.CDS.3873	MP38.CDS.3892	MP1.CDS.3905	MP2.CDS.2973	mp39.CDS.3861
cluster3734	H	Cof family hydrolase	MP_ATCC.CDS.4279	MP36.CDS.4170	MP37.CDS.4180	MP38.CDS.4201	MP1.CDS.4211	MP2.CDS.4222	mp39.CDS.4146
cluster3253	H	COG0028: Thiamine pyrophosphate-requiring enzymes	MP_ATCC.CDS.3728	MP36.CDS.4315	MP37.CDS.4272	MP38.CDS.4291	MP1.CDS.3896	MP2.CDS.2984	mp39.CDS.3851
cluster3418	H	COG0028: Thiamine pyrophosphate-requiring enzymes	MP_ATCC.CDS.3924	MP36.CDS.1984	MP37.CDS.2021	MP38.CDS.2106	MP1.CDS.2050	MP2.CDS.2048	mp39.CDS.1984
cluster4026	H	COG0028: Thiamine pyrophosphate-requiring enzymes	MP_ATCC.CDS.997	MP36.CDS.785
cluster749	C	COG0500: SAM-dependent methyltransferases	MP_ATCC.CDS.804	MP36.CDS.592	MP37.CDS.651	MP38.CDS.649	MP1.CDS.657	MP2.CDS.654	mp39.CDS.595
cluster2039	S	COG0714: MoxR-like ATPases	MP_ATCC.CDS.2291	MP36.CDS.1611	MP37.CDS.1657	MP38.CDS.1734	MP1.CDS.1678	MP2.CDS.1669	mp39.CDS.1621
cluster551	C	COG1180: Radical SAM, Pyruvate-formate lyase-activating enzyme like	MP_ATCC.CDS.567	MP36.CDS.3442	MP37.CDS.3470	MP38.CDS.3497	MP1.CDS.3492	MP2.CDS.3389	mp39.CDS.3462
cluster2065	J	COG1399 protein, clustered with ribosomal protein L32p	MP_ATCC.CDS.2324	MP36.CDS.3207	MP37.CDS.3236	MP38.CDS.3264	MP1.CDS.3264	MP2.CDS.3619	mp39.CDS.3221
cluster3694	J	COG1496: Uncharacterized conserved protein	MP_ATCC.CDS.4236	MP36.CDS.2350	MP37.CDS.2380	MP38.CDS.2459	MP1.CDS.2414	MP2.CDS.2410	mp39.CDS.2372
cluster2916	S	COG1872: Conserved Protein Domain Family YggU	MP_ATCC.CDS.3352	MP36.CDS.2159	MP37.CDS.2190	MP38.CDS.2272	MP1.CDS.2222	MP2.CDS.2221	mp39.CDS.2151
cluster2759	Q	COG1982: Arginine/lysine/ornithine decarboxylases	MP_ATCC.CDS.3169	MP36.CDS.2774	MP37.CDS.2808	MP38.CDS.2886	MP1.CDS.2837	MP2.CDS.2830	mp39.CDS.2804
cluster2760	Q	COG1982: Arginine/lysine/ornithine decarboxylases	MP_ATCC.CDS.3170	MP36.CDS.2773	MP37.CDS.2807	MP38.CDS.2885	MP1.CDS.2836	MP2.CDS.2829	mp39.CDS.2803
cluster1546	E	COG2071: predicted glutamine amidotransferases in hypothetical Actinobacterial gene cluster	MP_ATCC.CDS.1736	MP36.CDS.3134	MP37.CDS.3163	MP38.CDS.3190	MP1.CDS.3191	MP2.CDS.3693	mp39.CDS.3148
cluster1566	K	COG2740: Predicted nucleic-acid-binding protein implicated in transcription termination	MP_ATCC.CDS.1757	MP36.CDS.3111	MP37.CDS.3141	MP38.CDS.3168	MP1.CDS.3169	MP2.CDS.3716	mp39.CDS.3126
cluster3556	S	COG2907: Amine oxidase, flavin-containing	MP_ATCC.CDS.4076	MP36.CDS.466	MP37.CDS.524	MP38.CDS.522	MP1.CDS.529	MP2.CDS.526	mp39.CDS.467
cluster2974	S	COG4861: Uncharacterized protein conserved in bacteria	MP_ATCC.CDS.3420	MP36.CDS.891	MP37.CDS.955	MP38.CDS.956	MP1.CDS.960	MP2.CDS.961	mp39.CDS.896
cluster1578	N	COG0840: Methyl-accepting chemotaxis protein	MP_ATCC.CDS.1771	MP36.CDS.3097	MP37.CDS.3127	MP38.CDS.3154	MP1.CDS.3155	MP2.CDS.3730	mp39.CDS.3112
cluster2245	S	COG2343: Uncharacterized conserved protein, DUF427 family	MP_ATCC.CDS.2556	MP36.CDS.139	MP37.CDS.195	MP38.CDS.195	MP1.CDS.203	MP2.CDS.202	mp39.CDS.136
cluster994	K	Cold shock protein CspA	MP_ATCC.CDS.1076	MP36.CDS.3983	MP37.CDS.3999	MP38.CDS.4018	MP1.CDS.4029	MP2.CDS.4039	mp39.CDS.3990
cluster3008	K	Cold shock protein CspC	MP_ATCC.CDS.3457	MP36.CDS.928	MP37.CDS.994	MP38.CDS.994	MP1.CDS.998	MP2.CDS.1000	mp39.CDS.934
cluster3197	K	Cold-shock DEAD-box protein A	MP_ATCC.CDS.3669	MP36.CDS.1358	MP37.CDS.1418	MP38.CDS.1479	MP1.CDS.1429	MP2.CDS.1424	mp39.CDS.1365
cluster311	K	Colicin E2 tolerance protein CbrC-like protein	MP_ATCC.CDS.291	MP36.CDS.2502	MP37.CDS.2532	MP38.CDS.2608	MP1.CDS.2563	MP2.CDS.2559	mp39.CDS.2525
cluster447	C	Competence protein	MP_ATCC.CDS.448	MP36.CDS.2646	MP37.CDS.2675	MP38.CDS.2752	MP1.CDS.2705	MP2.CDS.2700	mp39.CDS.2668
cluster1724	C	Competence protein F homolog, phosphoribosyltransferase domain; protein YhgH required for utilization of DNA as sole source of carbon and energy	MP_ATCC.CDS.1941	MP36.CDS.3562	MP37.CDS.3593	MP38.CDS.3615	MP1.CDS.3613	MP2.CDS.3267	mp39.CDS.3581
cluster35	S	CONSERVED 13E12 REPEAT FAMILY PROTEIN	MP_ATCC.CDS.2837;MP_ATCC.CDS.3037	MP36.CDS.1497;MP36.CDS.3367	MP37.CDS.1556;MP37.CDS.3398	MP38.CDS.1626;MP38.CDS.3427	MP1.CDS.1567;MP1.CDS.3420	MP2.CDS.1559;MP2.CDS.3460	mp39.CDS.1506;mp39.CDS.3389
cluster3608	S	CONSERVED 13E12 REPEAT FAMILY PROTEIN	MP_ATCC.CDS.4136	MP36.CDS.407	MP37.CDS.464	MP38.CDS.464	MP1.CDS.471	MP2.CDS.468	mp39.CDS.408
cluster1223	S	CONSERVED EXPORTED PROTEIN	MP_ATCC.CDS.1346	MP36.CDS.1160	MP37.CDS.1222	MP38.CDS.1280	MP1.CDS.1229	MP2.CDS.1227	mp39.CDS.1168
cluster3654	S	CONSERVED HYPOTHETICAL ALA-, PRO-RICH PROTEIN	MP_ATCC.CDS.4189	MP36.CDS.1260	MP37.CDS.1320	MP38.CDS.1376	MP1.CDS.1328	MP2.CDS.1325	mp39.CDS.1266
cluster636	S	CONSERVED HYPOTHETICAL CYSTEINE RICH PROTEIN (FRAGMENT)	MP_ATCC.CDS.664	MP36.CDS.2990	MP37.CDS.3021	MP38.CDS.3044	MP1.CDS.3047	MP2.CDS.3838	mp39.CDS.3015
cluster2273	M	Conserved hypothetical integral membrane protein YrbE1A	MP_ATCC.CDS.2587	MP36.CDS.172	MP37.CDS.226	MP38.CDS.226	MP1.CDS.234	MP2.CDS.233	mp39.CDS.168
cluster3806	M	Conserved hypothetical integral membrane protein YrbE1A	MP_ATCC.CDS.1794	MP36.CDS.3841		MP38.CDS.3877	MP1.CDS.3888	MP2.CDS.2992	mp39.CDS.3843
cluster5475	M	Conserved hypothetical integral membrane protein YrbE1A			MP37.CDS.3858
cluster5623	M	Conserved hypothetical integral membrane protein YrbE1A		MP36.CDS.3840
cluster777	M	Conserved hypothetical integral membrane protein YrbE1A	MP_ATCC.CDS.833	MP36.CDS.621	MP37.CDS.681	MP38.CDS.679	MP1.CDS.687	MP2.CDS.685	mp39.CDS.625
cluster1597	M	Conserved hypothetical integral membrane protein YrbE1B	MP_ATCC.CDS.1795	MP36.CDS.3839	MP37.CDS.3856	MP38.CDS.3876	MP1.CDS.3887	MP2.CDS.2993	mp39.CDS.3842
cluster2274	M	Conserved hypothetical integral membrane protein YrbE1B	MP_ATCC.CDS.2588	MP36.CDS.173	MP37.CDS.227	MP38.CDS.227	MP1.CDS.235	MP2.CDS.234	mp39.CDS.169
cluster778	M	Conserved hypothetical integral membrane protein YrbE1B	MP_ATCC.CDS.834	MP36.CDS.622	MP37.CDS.682	MP38.CDS.680	MP1.CDS.688	MP2.CDS.686	mp39.CDS.626
cluster179	M	conserved hypothetical membrane protein	MP_ATCC.CDS.133	MP36.CDS.3928	MP37.CDS.3946	MP38.CDS.3964	MP1.CDS.3978	MP2.CDS.2901	mp39.CDS.3934
cluster3718	M	Conserved hypothetical regulatory protein	MP_ATCC.CDS.4261	MP36.CDS.2375	MP37.CDS.2405	MP38.CDS.2484	MP1.CDS.2439	MP2.CDS.2436	mp39.CDS.2398
cluster2215	M	conserved integral membrane protein	MP_ATCC.CDS.2523	MP36.CDS.105	MP37.CDS.162	MP38.CDS.162	MP1.CDS.170	MP2.CDS.169	mp39.CDS.104
cluster2307	M	conserved integral membrane protein	MP_ATCC.CDS.2630	MP36.CDS.214	MP37.CDS.267	MP38.CDS.269	MP1.CDS.275	MP2.CDS.275	mp39.CDS.210
cluster67	M	conserved integral membrane protein	MP_ATCC.CDS.2625;MP_ATCC.CDS.2626	MP36.CDS.210	MP37.CDS.263	MP38.CDS.264	MP1.CDS.271	MP2.CDS.271	mp39.CDS.206
cluster1248	M	CONSERVED MEMBRANE PROTEIN	MP_ATCC.CDS.1376	MP36.CDS.1193	MP37.CDS.1255	MP38.CDS.1312	MP1.CDS.1263	MP2.CDS.1260	mp39.CDS.1201
cluster1638	M	CONSERVED MEMBRANE PROTEIN	MP_ATCC.CDS.1840	MP36.CDS.1458	MP37.CDS.1519	MP38.CDS.1579	MP1.CDS.1529	MP2.CDS.1521	mp39.CDS.1468
cluster1839	M	CONSERVED MEMBRANE PROTEIN	MP_ATCC.CDS.2063	MP36.CDS.1746	MP37.CDS.1788	MP38.CDS.1868	MP1.CDS.1810	MP2.CDS.1788	mp39.CDS.1748
cluster1856	M	conserved membrane protein	MP_ATCC.CDS.2084	MP36.CDS.1766	MP37.CDS.1807	MP38.CDS.1888	MP1.CDS.1830	MP2.CDS.1808	mp39.CDS.1767
cluster2107	M	conserved membrane protein	MP_ATCC.CDS.2374	MP36.CDS.303	MP37.CDS.358	MP38.CDS.359	MP1.CDS.366	MP2.CDS.364	mp39.CDS.301
cluster2109	M	conserved membrane protein	MP_ATCC.CDS.2376	MP36.CDS.301	MP37.CDS.356	MP38.CDS.357	MP1.CDS.364	MP2.CDS.362	mp39.CDS.299
cluster2115	M	conserved membrane protein	MP_ATCC.CDS.2383	MP36.CDS.294	MP37.CDS.349	MP38.CDS.350	MP1.CDS.357	MP2.CDS.355	mp39.CDS.292
cluster2301	M	conserved membrane protein	MP_ATCC.CDS.2622	MP36.CDS.207	MP37.CDS.260	MP38.CDS.261	MP1.CDS.268	MP2.CDS.268	mp39.CDS.203
cluster2326	M	conserved membrane protein	MP_ATCC.CDS.2649	MP36.CDS.233	MP37.CDS.286	MP38.CDS.288	MP1.CDS.294	MP2.CDS.294	mp39.CDS.229
cluster2419	M	CONSERVED MEMBRANE PROTEIN	MP_ATCC.CDS.2781	MP36.CDS.1552	MP37.CDS.1611	MP38.CDS.1681	MP1.CDS.1623	MP2.CDS.1615	mp39.CDS.1563
cluster2522	M	CONSERVED MEMBRANE PROTEIN	MP_ATCC.CDS.2900	MP36.CDS.1074	MP37.CDS.1139	MP38.CDS.1195	MP1.CDS.1147	MP2.CDS.1145	mp39.CDS.1085
cluster664	M	conserved membrane protein	MP_ATCC.CDS.708	MP36.CDS.3033	MP37.CDS.3063	MP38.CDS.3087	MP1.CDS.3091	MP2.CDS.3794	mp39.CDS.3049
cluster132	M	Conserved protein IgrD	MP_ATCC.CDS.83	MP36.CDS.3880	MP37.CDS.3897	MP38.CDS.3916	MP1.CDS.3929	MP2.CDS.2949	mp39.CDS.3885
cluster2209	P	Copper resistance protein CopD / Cytochrome c oxidase caa3-type, assembly factor CtaG-related protein	MP_ATCC.CDS.2513	MP36.CDS.94	MP37.CDS.153	MP38.CDS.151	MP1.CDS.161	MP2.CDS.160	mp39.CDS.93
cluster523	P	Cosmid L247	MP_ATCC.CDS.534	MP36.CDS.1931	MP37.CDS.1966	MP38.CDS.2050	MP1.CDS.1992	MP2.CDS.1975	mp39.CDS.1927
cluster2641	K	CrcB protein	MP_ATCC.CDS.3033	MP36.CDS.3363	MP37.CDS.3393	MP38.CDS.3423	MP1.CDS.3416	MP2.CDS.3464	mp39.CDS.3385
cluster1582	L	CRISPR repeat RNA endoribonuclease Cas6	MP_ATCC.CDS.1776	MP36.CDS.3092	MP37.CDS.3121	MP38.CDS.3147	MP1.CDS.3150	MP2.CDS.3735	mp39.CDS.3106
cluster1588	L	CRISPR-associated protein Cas1	MP_ATCC.CDS.1783	MP36.CDS.3085	MP37.CDS.3114	MP38.CDS.3139	MP1.CDS.3143	MP2.CDS.3742	mp39.CDS.3098
cluster1589	L	CRISPR-associated protein Cas2	MP_ATCC.CDS.1784	MP36.CDS.3084	MP37.CDS.3113	MP38.CDS.3138	MP1.CDS.3142	MP2.CDS.3743	mp39.CDS.3097
cluster1587	L	CRISPR-associated protein Csm6	MP_ATCC.CDS.1782	MP36.CDS.3086	MP37.CDS.3115	MP38.CDS.3141	MP1.CDS.3144	MP2.CDS.3741	mp39.CDS.3099
cluster65	L	CRISPR-associated protein, Csm1 family	MP_ATCC.CDS.1777	MP36.CDS.3091	MP37.CDS.3120	MP38.CDS.3146	MP1.CDS.3149	MP2.CDS.3736	mp39.CDS.3105;mp39.CDS.3104
cluster1583	L	CRISPR-associated protein, Csm2 family	MP_ATCC.CDS.1778	MP36.CDS.3090	MP37.CDS.3119	MP38.CDS.3145	MP1.CDS.3148	MP2.CDS.3737	mp39.CDS.3103
cluster1586	L	CRISPR-associated protein, Csm5 family	MP_ATCC.CDS.1781	MP36.CDS.3087	MP37.CDS.3116	MP38.CDS.3142	MP1.CDS.3145	MP2.CDS.3740	mp39.CDS.3100
cluster1584	L	CRISPR-associated RAMP Csm3	MP_ATCC.CDS.1779	MP36.CDS.3089	MP37.CDS.3118	MP38.CDS.3144	MP1.CDS.3147	MP2.CDS.3738	mp39.CDS.3102
cluster1585	L	CRISPR-associated RAMP protein, Csm4 family	MP_ATCC.CDS.1780	MP36.CDS.3088	MP37.CDS.3117	MP38.CDS.3143	MP1.CDS.3146	MP2.CDS.3739	mp39.CDS.3101
cluster2703	L	Crossover junction endodeoxyribonuclease RuvC (EC 3.1.22.4)	MP_ATCC.CDS.3104	MP36.CDS.2839	MP37.CDS.2873	MP38.CDS.1147	MP1.CDS.2903	MP2.CDS.3990	mp39.CDS.2866
cluster1914	G	CTP synthase (EC 6.3.4.2)	MP_ATCC.CDS.2152	MP36.CDS.1838	MP37.CDS.1875	MP38.CDS.1956	MP1.CDS.1900	MP2.CDS.1877	mp39.CDS.1839
cluster2127	G	CTP:molybdopterin cytidylyltransferase	MP_ATCC.CDS.2396	MP36.CDS.356	MP37.CDS.412	MP38.CDS.413	MP1.CDS.420	MP2.CDS.417	mp39.CDS.356
cluster3628	G	CTP:molybdopterin cytidylyltransferase	MP_ATCC.CDS.4161	MP36.CDS.383	MP37.CDS.439	MP38.CDS.440	MP1.CDS.447	MP2.CDS.444	mp39.CDS.383
cluster98	T	Cyanoglobin; Hemoglobin-like protein HbN	MP_ATCC.CDS.34	MP36.CDS.1683	MP37.CDS.1726	MP38.CDS.1804	MP1.CDS.1748	MP2.CDS.1724	mp39.CDS.1685
cluster882	T	Cyclic amid hydrolase in mycofactocin cluster	MP_ATCC.CDS.952	MP36.CDS.741	MP37.CDS.801	MP38.CDS.798	MP1.CDS.808	MP2.CDS.807	mp39.CDS.745
cluster2526	T	cyclic nucleotide-binding protein	MP_ATCC.CDS.2904	MP36.CDS.1070	MP37.CDS.1135	MP38.CDS.1191	MP1.CDS.1143	MP2.CDS.1141	mp39.CDS.1081
cluster1808	T	Cyclic pyranopterin monophosphate synthase (EC 4.1.99.18)	MP_ATCC.CDS.2029	MP36.CDS.3650	MP37.CDS.3681	MP38.CDS.3702	MP1.CDS.3700	MP2.CDS.3179	mp39.CDS.3669
cluster3006	T	Cyclic pyranopterin monophosphate synthase (EC 4.1.99.18)	MP_ATCC.CDS.3455	MP36.CDS.926	MP37.CDS.992	MP38.CDS.992	MP1.CDS.996	MP2.CDS.998	mp39.CDS.932
cluster3687	T	Cyclic pyranopterin monophosphate synthase (EC 4.1.99.18)	MP_ATCC.CDS.4228	MP36.CDS.3406	MP37.CDS.3435	MP38.CDS.3464	MP1.CDS.3457	MP2.CDS.3422	mp39.CDS.3429
cluster2456	M	Cyclohexanone monooxygenase (EC 1.14.13.22)	MP_ATCC.CDS.2820	MP36.CDS.1514	MP37.CDS.1572	MP38.CDS.1642	MP1.CDS.1583	MP2.CDS.1575	mp39.CDS.1522
cluster3028	M	Cyclohexanone monooxygenase (EC 1.14.13.22)	MP_ATCC.CDS.3484	MP36.CDS.955	MP37.CDS.1020	MP38.CDS.1020	MP1.CDS.1026	MP2.CDS.1027	mp39.CDS.960
cluster3081	E	Cyclohexanone monooxygenase (EC 1.14.13.22)	MP_ATCC.CDS.3538	MP36.CDS.1010	MP37.CDS.1074	MP38.CDS.1074	MP1.CDS.1080	MP2.CDS.1080	mp39.CDS.1016
cluster1069	T	Cyclopropane-fatty-acyl-phospholipid synthase (EC 2.1.1.79)	MP_ATCC.CDS.1160	MP36.CDS.4069	MP37.CDS.4081	MP38.CDS.4101	MP1.CDS.4112	MP2.CDS.4122	mp39.CDS.4071
cluster1150	I	Cyclopropane-fatty-acyl-phospholipid synthase (EC 2.1.1.79)	MP_ATCC.CDS.1254	MP36.CDS.529	MP37.CDS.589	MP38.CDS.586	MP1.CDS.593	MP2.CDS.591	mp39.CDS.531
cluster3264	I	Cyclopropane-fatty-acyl-phospholipid synthase (EC 2.1.1.79)	MP_ATCC.CDS.3742	MP36.CDS.3718	MP37.CDS.3748	MP38.CDS.3769	MP1.CDS.3767	MP2.CDS.3111	mp39.CDS.3737
cluster3535	I	Cyclopropane-fatty-acyl-phospholipid synthase (EC 2.1.1.79)	MP_ATCC.CDS.4051	MP36.CDS.491	MP37.CDS.551	MP38.CDS.547	MP1.CDS.554	MP2.CDS.551	mp39.CDS.492
cluster3536	I	Cyclopropane-fatty-acyl-phospholipid synthase (EC 2.1.1.79)	MP_ATCC.CDS.4052	MP36.CDS.490	MP37.CDS.550	MP38.CDS.546	MP1.CDS.553	MP2.CDS.550	mp39.CDS.491
cluster831	I	Cyclopropane-fatty-acyl-phospholipid synthase (EC 2.1.1.79)	MP_ATCC.CDS.894	MP36.CDS.683	MP37.CDS.743	MP38.CDS.740	MP1.CDS.749	MP2.CDS.748	mp39.CDS.686
cluster832	I	Cyclopropane-fatty-acyl-phospholipid synthase (EC 2.1.1.79)	MP_ATCC.CDS.895	MP36.CDS.684	MP37.CDS.744	MP38.CDS.741	MP1.CDS.750	MP2.CDS.749	mp39.CDS.687
cluster833	I	Cyclopropane-fatty-acyl-phospholipid synthase (EC 2.1.1.79)	MP_ATCC.CDS.896	MP36.CDS.685	MP37.CDS.745	MP38.CDS.742	MP1.CDS.751	MP2.CDS.750	mp39.CDS.688
cluster834	I	Cyclopropane-fatty-acyl-phospholipid synthase (EC 2.1.1.79)	MP_ATCC.CDS.897	MP36.CDS.686	MP37.CDS.746	MP38.CDS.743	MP1.CDS.752	MP2.CDS.751	mp39.CDS.689
cluster1180	E	Cystathionine beta-lyase, type II (EC 4.4.1.8)	MP_ATCC.CDS.1290	MP36.CDS.64	MP37.CDS.123	MP38.CDS.120	MP1.CDS.130	MP2.CDS.130	mp39.CDS.65
cluster312	E	Cystathionine beta-lyase, type II (EC 4.4.1.8)	MP_ATCC.CDS.292	MP36.CDS.2501	MP37.CDS.2531	MP38.CDS.2607	MP1.CDS.2562	MP2.CDS.2558	mp39.CDS.2524
cluster1225	E	Cystathionine beta-synthase (EC 4.2.1.22)	MP_ATCC.CDS.1348	MP36.CDS.1162	MP37.CDS.1224	MP38.CDS.1282	MP1.CDS.1231	MP2.CDS.1229	mp39.CDS.1170
cluster1227	E	Cystathionine gamma-lyase (EC 4.4.1.1)	MP_ATCC.CDS.1350	MP36.CDS.1164	MP37.CDS.1227	MP38.CDS.1284	MP1.CDS.1233	MP2.CDS.1231	mp39.CDS.1172
cluster1048	E	Cysteine desulfurase (EC 2.8.1.7)	MP_ATCC.CDS.1138	MP36.CDS.4047	MP37.CDS.4059	MP38.CDS.4079	MP1.CDS.4090	MP2.CDS.4100	mp39.CDS.4049
cluster1123	E	Cysteine desulfurase (EC 2.8.1.7)	MP_ATCC.CDS.1222	MP36.CDS.4132	MP37.CDS.4143	MP38.CDS.4164	MP1.CDS.4175	MP2.CDS.4185	mp39.CDS.4110
cluster2594	E	Cysteine desulfurase (EC 2.8.1.7)	MP_ATCC.CDS.2982	MP36.CDS.3313	MP37.CDS.3345	MP38.CDS.3372	MP1.CDS.3366	MP2.CDS.3514	mp39.CDS.3334
cluster2053	E	Cysteine desulfurase (EC 2.8.1.7), SufS subfamily	MP_ATCC.CDS.2307	MP36.CDS.1595	MP37.CDS.1641	MP38.CDS.1718	MP1.CDS.1661	MP2.CDS.1640	mp39.CDS.1605
cluster1030	E	Cysteine synthase (EC 2.5.1.47)	MP_ATCC.CDS.1119	MP36.CDS.4026	MP37.CDS.4041	MP38.CDS.4059	MP1.CDS.4071	MP2.CDS.4080	mp39.CDS.4030
cluster268	E	Cysteine synthase (EC 2.5.1.47)	MP_ATCC.CDS.238	MP36.CDS.2554	MP37.CDS.2586	MP38.CDS.2660	MP1.CDS.2615	MP2.CDS.2610	mp39.CDS.2576
cluster2985	E	Cysteine synthase (EC 2.5.1.47)	MP_ATCC.CDS.3434	MP36.CDS.905	MP37.CDS.969	MP38.CDS.971	MP1.CDS.974	MP2.CDS.976	mp39.CDS.910
cluster1644	E	Cysteine synthase B (EC 2.5.1.47)	MP_ATCC.CDS.1846	MP36.CDS.1452	MP37.CDS.1513	MP38.CDS.1573	MP1.CDS.1523	MP2.CDS.1515	mp39.CDS.1462
cluster172	A	Cysteinyl-tRNA synthetase (EC 6.1.1.16)	MP_ATCC.CDS.126	MP36.CDS.3921	MP37.CDS.3939	MP38.CDS.3957	MP1.CDS.3971	MP2.CDS.2908	mp39.CDS.3927
cluster3691	E	Cytidine and deoxycytidylate deaminase family protein	MP_ATCC.CDS.4233	MP36.CDS.3411	MP37.CDS.3440	MP38.CDS.3469	MP1.CDS.3462	MP2.CDS.3417	mp39.CDS.3434
cluster1797	E	Cytidine deaminase (EC 3.5.4.5)	MP_ATCC.CDS.2018	MP36.CDS.3639	MP37.CDS.3670	MP38.CDS.3691	MP1.CDS.3689	MP2.CDS.3190	mp39.CDS.3658
cluster1930	C	Cytidylate kinase (EC 2.7.4.25)	MP_ATCC.CDS.2169	MP36.CDS.1856	MP37.CDS.1893	MP38.CDS.1974	MP1.CDS.1918	MP2.CDS.1896	mp39.CDS.1857
cluster2613	C	Cytochrome c oxidase polypeptide I (EC 1.9.3.1)	MP_ATCC.CDS.3001	MP36.CDS.3332	MP37.CDS.3364	MP38.CDS.3391	MP1.CDS.3385	MP2.CDS.3495	mp39.CDS.3353
cluster398	C	Cytochrome c oxidase polypeptide II (EC 1.9.3.1)	MP_ATCC.CDS.389	MP36.CDS.2401	MP37.CDS.2432	MP38.CDS.2511	MP1.CDS.2466	MP2.CDS.2462	mp39.CDS.2426
cluster405	C	Cytochrome c oxidase polypeptide III (EC 1.9.3.1)	MP_ATCC.CDS.396	MP36.CDS.2394	MP37.CDS.2425	MP38.CDS.2504	MP1.CDS.2459	MP2.CDS.2455	mp39.CDS.2418
cluster715	C	Cytochrome c-type biogenesis protein CcdA (DsbD analog)	MP_ATCC.CDS.766	MP36.CDS.555	MP37.CDS.614	MP38.CDS.611	MP1.CDS.619	MP2.CDS.616	mp39.CDS.556
cluster717	C	Cytochrome c-type biogenesis protein CcsA/ResC	MP_ATCC.CDS.768	MP36.CDS.557	MP37.CDS.616	MP38.CDS.613	MP1.CDS.621	MP2.CDS.618	mp39.CDS.558
cluster1844	C	Cytochrome d ubiquinol oxidase subunit I (EC 1.10.3.-)	MP_ATCC.CDS.2070	MP36.CDS.1753	MP37.CDS.1795	MP38.CDS.1875	MP1.CDS.1817	MP2.CDS.1795	mp39.CDS.1754
cluster1843	C	Cytochrome d ubiquinol oxidase subunit II (EC 1.10.3.-)	MP_ATCC.CDS.2069	MP36.CDS.1752	MP37.CDS.1794	MP38.CDS.1874	MP1.CDS.1816	MP2.CDS.1794	mp39.CDS.1753
cluster2061	C	Cytochrome oxidase assembly protein	MP_ATCC.CDS.2315	MP36.CDS.1587	MP37.CDS.1633	MP38.CDS.1710	MP1.CDS.1653	MP2.CDS.1632	mp39.CDS.1597
cluster361	C	Cytochrome oxidase biogenesis protein Surf1, facilitates heme A insertion	MP_ATCC.CDS.349	MP36.CDS.2442	MP37.CDS.2472	MP38.CDS.2552	MP1.CDS.2506	MP2.CDS.2502	mp39.CDS.2467
cluster1031	Q	Cytochrome P450	MP_ATCC.CDS.1120	MP36.CDS.4027	MP37.CDS.4042	MP38.CDS.4060	MP1.CDS.4072	MP2.CDS.4081	mp39.CDS.4031
cluster1883	Q	Cytochrome P450	MP_ATCC.CDS.2119	MP36.CDS.1803	MP37.CDS.1841	MP38.CDS.1922	MP1.CDS.1865	MP2.CDS.1842	mp39.CDS.1803
cluster4521	Q	Cytochrome P450		MP36.CDS.817
cluster4942	Q	Cytochrome P450				MP38.CDS.883
cluster5738	Q	Cytochrome P450			MP37.CDS.880
cluster955	Q	Cytochrome P450	MP_ATCC.CDS.1035	MP36.CDS.818	MP37.CDS.881	MP38.CDS.884	MP1.CDS.887	MP2.CDS.887	mp39.CDS.825
cluster2455	Q	Cytochrome P450 132	MP_ATCC.CDS.2819	MP36.CDS.1515	MP37.CDS.1573	MP38.CDS.1643	MP1.CDS.1584	MP2.CDS.1576	mp39.CDS.1523
cluster2869	C	Cytoplasmic membrane protein FsxA	MP_ATCC.CDS.3295	MP36.CDS.2245	MP37.CDS.2275	MP38.CDS.2359	MP1.CDS.2309	MP2.CDS.2306	mp39.CDS.2244
cluster385	C	Cytosol aminopeptidase PepA (EC 3.4.11.1)	MP_ATCC.CDS.376	MP36.CDS.2416	MP37.CDS.2446	MP38.CDS.2526	MP1.CDS.2480	MP2.CDS.2476	mp39.CDS.2440
cluster3378	H, R	D-3-phosphoglycerate dehydrogenase (EC 1.1.1.95)	MP_ATCC.CDS.3881	MP36.CDS.3286	MP37.CDS.3315	MP38.CDS.3344	MP1.CDS.3338	MP2.CDS.3543	mp39.CDS.3305
cluster916	H, R	D-3-phosphoglycerate dehydrogenase (EC 1.1.1.95)	MP_ATCC.CDS.988	MP36.CDS.776	MP37.CDS.836	MP38.CDS.833	MP1.CDS.843	MP2.CDS.842	mp39.CDS.780
cluster3392	M	D-alanine--D-alanine ligase (EC 6.3.2.4)	MP_ATCC.CDS.3895	MP36.CDS.3272	MP37.CDS.3300	MP38.CDS.3329	MP1.CDS.3324	MP2.CDS.3557	mp39.CDS.3289
cluster1393	M	D-alanyl-D-alanine carboxypeptidase (EC 3.4.16.4)	MP_ATCC.CDS.1562	MP36.CDS.3961	MP37.CDS.3977	MP38.CDS.3996	MP1.CDS.4005	MP2.CDS.4017	mp39.CDS.3967
cluster1495	M	D-alanyl-D-alanine carboxypeptidase (EC 3.4.16.4)	MP_ATCC.CDS.1680	MP36.CDS.3191	MP37.CDS.3219	MP38.CDS.3247	MP1.CDS.3248	MP2.CDS.3636	mp39.CDS.3204
cluster1995	M	D-alanyl-D-alanine carboxypeptidase (EC 3.4.16.4)	MP_ATCC.CDS.2241	MP36.CDS.2100	MP37.CDS.2135	MP38.CDS.2216	MP1.CDS.2164	MP2.CDS.2163	mp39.CDS.2096
cluster3317	M	D-alanyl-D-alanine carboxypeptidase (EC 3.4.16.4)	MP_ATCC.CDS.3802	MP36.CDS.3656	MP37.CDS.3688	MP38.CDS.3709	MP1.CDS.3707	MP2.CDS.3172	mp39.CDS.3675
cluster3602	M	D-alanyl-D-alanine carboxypeptidase (EC 3.4.16.4)	MP_ATCC.CDS.4127	MP36.CDS.415	MP37.CDS.472	MP38.CDS.472	MP1.CDS.478	MP2.CDS.475	mp39.CDS.416
cluster587	M	D-alanyl-D-alanine carboxypeptidase (EC 3.4.16.4)	MP_ATCC.CDS.611	MP36.CDS.2940	MP37.CDS.2970	MP38.CDS.2993	MP1.CDS.2996	MP2.CDS.3889	mp39.CDS.2963
cluster2976	M	D-alanyl-D-alanine dipeptidase (EC 3.4.13.22)	MP_ATCC.CDS.3423	MP36.CDS.894	MP37.CDS.958	MP38.CDS.959	MP1.CDS.963	MP2.CDS.964	mp39.CDS.898
cluster3502	M	D-amino-acid oxidase (EC 1.4.3.3)	MP_ATCC.CDS.4015	MP36.CDS.2080	MP37.CDS.2116	MP38.CDS.2197	MP1.CDS.2144	MP2.CDS.2144	mp39.CDS.2076
cluster1746	S	D-glycero-D-manno-heptose 1-phosphate guanosyltransferase	MP_ATCC.CDS.1964	MP36.CDS.3586	MP37.CDS.3616	MP38.CDS.3638	MP1.CDS.3636	MP2.CDS.3243	mp39.CDS.3604
cluster1919	U	D-serine/D-alanine/glycine transporter	MP_ATCC.CDS.2158	MP36.CDS.1845	MP37.CDS.1882	MP38.CDS.1963	MP1.CDS.1907	MP2.CDS.1884	mp39.CDS.1846
cluster1920	U	D-serine/D-alanine/glycine transporter	MP_ATCC.CDS.2159	MP36.CDS.1846	MP37.CDS.1883	MP38.CDS.1964	MP1.CDS.1908	MP2.CDS.1885	mp39.CDS.1847
cluster3494	U	D-tyrosyl-tRNA(Tyr) deacylase (EC 3.6.1.n1)	MP_ATCC.CDS.4006	MP36.CDS.2071	MP37.CDS.2106	MP38.CDS.2188	MP1.CDS.2135	MP2.CDS.2134	mp39.CDS.2065
cluster2219	U	D,D-heptose 7-phosphate kinase	MP_ATCC.CDS.2527	MP36.CDS.109	MP37.CDS.166	MP38.CDS.166	MP1.CDS.174	MP2.CDS.173	mp39.CDS.108
cluster1249	L	Death on curing protein, Doc toxin	MP_ATCC.CDS.1377	MP36.CDS.1194	MP37.CDS.1256	MP38.CDS.1313	MP1.CDS.1264	MP2.CDS.1261	mp39.CDS.1202
cluster1974	L	Death on curing protein, Doc toxin	MP_ATCC.CDS.2219	MP36.CDS.2123	MP37.CDS.2157	MP38.CDS.2238	MP1.CDS.2187	MP2.CDS.2186	mp39.CDS.2118
cluster849	L	Death on curing protein, Doc toxin	MP_ATCC.CDS.913	MP36.CDS.702	MP37.CDS.762	MP38.CDS.759	MP1.CDS.768	MP2.CDS.767	mp39.CDS.705
cluster2027	L	DedA family protein paralog	MP_ATCC.CDS.2279	MP36.CDS.1625	MP37.CDS.1671	MP38.CDS.1748	MP1.CDS.1692	MP2.CDS.1683	mp39.CDS.1635
cluster2174	L	DedA protein	MP_ATCC.CDS.2466	MP36.CDS.2888	MP37.CDS.2921	MP38.CDS.2941	MP1.CDS.2948	MP2.CDS.3940	mp39.CDS.2913
cluster3635	L	DedA protein	MP_ATCC.CDS.4168	MP36.CDS.376	MP37.CDS.432	MP38.CDS.433	MP1.CDS.440	MP2.CDS.437	mp39.CDS.376
cluster256	C	Dehydrogenase	MP_ATCC.CDS.219	MP36.CDS.4186	MP37.CDS.4197	MP38.CDS.4217	MP1.CDS.4227	MP2.CDS.4238	mp39.CDS.4163
cluster643	C	Dehydrogenase	MP_ATCC.CDS.682	MP36.CDS.3008	MP37.CDS.3038	MP38.CDS.3061	MP1.CDS.3065	MP2.CDS.3820	mp39.CDS.3023
cluster884	C	Dehydrogenase in mycofactocin cluster	MP_ATCC.CDS.954	MP36.CDS.743	MP37.CDS.803	MP38.CDS.800	MP1.CDS.810	MP2.CDS.809	mp39.CDS.747
cluster2988	C	Dehydrogenases with different specificities (related to short-chain alcohol dehydrogenases)	MP_ATCC.CDS.3437	MP36.CDS.908	MP37.CDS.972	MP38.CDS.974	MP1.CDS.977	MP2.CDS.979	mp39.CDS.913
cluster3066	C	Dehydrogenases with different specificities (related to short-chain alcohol dehydrogenases)	MP_ATCC.CDS.3523	MP36.CDS.995	MP37.CDS.1059	MP38.CDS.1059	MP1.CDS.1065	MP2.CDS.1065	mp39.CDS.1000
cluster3679	H, R	Delta-1-pyrroline-5-carboxylate dehydrogenase (EC 1.2.1.88)	MP_ATCC.CDS.4218	MP36.CDS.1290	MP37.CDS.1350	MP38.CDS.1407	MP1.CDS.1358	MP2.CDS.1355	mp39.CDS.1298
cluster747	H	Demethylmenaquinone methyltransferase (EC 2.1.1.163)	MP_ATCC.CDS.802	MP36.CDS.590	MP37.CDS.649	MP38.CDS.647	MP1.CDS.655	MP2.CDS.652	mp39.CDS.593
cluster2080	F	Deoxycytidine triphosphate deaminase (EC 3.5.4.30) (dUMP-forming)	MP_ATCC.CDS.2344	MP36.CDS.333	MP37.CDS.388	MP38.CDS.390	MP1.CDS.396	MP2.CDS.394	mp39.CDS.332
cluster3526	F	Deoxyribose-phosphate aldolase (EC 4.1.2.4)	MP_ATCC.CDS.4042	MP36.CDS.500	MP37.CDS.561	MP38.CDS.557	MP1.CDS.564	MP2.CDS.561	mp39.CDS.501
cluster598	F	Deoxyuridine 5'-triphosphate nucleotidohydrolase (EC 3.6.1.23)	MP_ATCC.CDS.622	MP36.CDS.2951	MP37.CDS.2981	MP38.CDS.3004	MP1.CDS.3007	MP2.CDS.3878	mp39.CDS.2974
cluster1852	R	Dephospho-CoA kinase (EC 2.7.1.24)	MP_ATCC.CDS.2079	MP36.CDS.1761	MP37.CDS.1803	MP38.CDS.1883	MP1.CDS.1825	MP2.CDS.1803	mp39.CDS.1762
cluster2475	T	desaturase-related protein	MP_ATCC.CDS.2842	MP36.CDS.1492	MP37.CDS.1551	MP38.CDS.1621	MP1.CDS.1562	MP2.CDS.1554	mp39.CDS.1501
cluster71	F	Dethiobiotin synthetase (EC 6.3.3.3)	MP_ATCC.CDS.4	MP36.CDS.1713	MP37.CDS.1756	MP38.CDS.1834	MP1.CDS.1778	MP2.CDS.1754	mp39.CDS.1715
cluster15	I	Diacyglycerol O-acyltransferase (EC 2.3.1.20)	MP_ATCC.CDS.1176;MP_ATCC.CDS.1182	MP36.CDS.4085;MP36.CDS.4092	MP37.CDS.4097;MP37.CDS.4103	MP38.CDS.4117;MP38.CDS.4124	MP1.CDS.4128;MP1.CDS.4135	MP2.CDS.4138;MP2.CDS.4145	mp39.CDS.4087;mp39.CDS.4094
cluster1717	I	Diacyglycerol O-acyltransferase (EC 2.3.1.20)	MP_ATCC.CDS.1932	MP36.CDS.3553	MP37.CDS.3584	MP38.CDS.3606	MP1.CDS.3604	MP2.CDS.3276	mp39.CDS.3572
cluster2425	I	Diacyglycerol O-acyltransferase (EC 2.3.1.20)	MP_ATCC.CDS.2787	MP36.CDS.1546	MP37.CDS.1605	MP38.CDS.1675	MP1.CDS.1617	MP2.CDS.1609	mp39.CDS.1557
cluster2656	I	Diacyglycerol O-acyltransferase (EC 2.3.1.20)	MP_ATCC.CDS.3049	MP36.CDS.3380	MP37.CDS.3411	MP38.CDS.3440	MP1.CDS.3433	MP2.CDS.3447	mp39.CDS.3403
cluster3031	I	Diacyglycerol O-acyltransferase (EC 2.3.1.20)	MP_ATCC.CDS.3487	MP36.CDS.958	MP37.CDS.1023	MP38.CDS.1023	MP1.CDS.1029	MP2.CDS.1030	mp39.CDS.963
cluster319	I	Diacyglycerol O-acyltransferase (EC 2.3.1.20)	MP_ATCC.CDS.300	MP36.CDS.2493	MP37.CDS.2523	MP38.CDS.2600	MP1.CDS.2555	MP2.CDS.2551	mp39.CDS.2517
cluster3281	I	Diacyglycerol O-acyltransferase (EC 2.3.1.20)	MP_ATCC.CDS.3761	MP36.CDS.3698	MP37.CDS.3728	MP38.CDS.3750	MP1.CDS.3748	MP2.CDS.3131	mp39.CDS.3717
cluster559	I	Diacyglycerol O-acyltransferase (EC 2.3.1.20)	MP_ATCC.CDS.576	MP36.CDS.3431	MP37.CDS.3460	MP38.CDS.3488	MP1.CDS.3482	MP2.CDS.3398	mp39.CDS.3452
cluster346	I	Diacylglycerol kinase-related protein	MP_ATCC.CDS.331	MP36.CDS.2460	MP37.CDS.2491	MP38.CDS.2570	MP1.CDS.2524	MP2.CDS.2520	mp39.CDS.2485
cluster2441	F	Diaminohydroxyphosphoribosylaminopyrimidine deaminase (EC 3.5.4.26) / 5-amino-6-(5-phosphoribosylamino)uracil reductase (EC 1.1.1.193)	MP_ATCC.CDS.2804	MP36.CDS.1530	MP37.CDS.1589	MP38.CDS.1659	MP1.CDS.1600	MP2.CDS.1592	mp39.CDS.1539
cluster3157	E	Diaminopimelate decarboxylase (EC 4.1.1.20)	MP_ATCC.CDS.3624	MP36.CDS.1402	MP37.CDS.1465	MP38.CDS.1524	MP1.CDS.1473	MP2.CDS.1468	mp39.CDS.1412
cluster625	E	Diaminopimelate epimerase (EC 5.1.1.7)	MP_ATCC.CDS.652	MP36.CDS.2978	MP37.CDS.3009	MP38.CDS.3032	MP1.CDS.3034	MP2.CDS.3850	mp39.CDS.3002
cluster3749	Q	dicarboxylic acid transporter PcaT	MP_ATCC.CDS.4295	MP36.CDS.3812	MP37.CDS.3830	MP38.CDS.1603	MP1.CDS.3861	MP2.CDS.3019	mp39.CDS.3816
cluster657	E	Dienelactone hydrolase family	MP_ATCC.CDS.699	MP36.CDS.3025	MP37.CDS.3055	MP38.CDS.3078	MP1.CDS.3082	MP2.CDS.3803	mp39.CDS.3040
cluster2868	E	Dienelactone hydrolase family protein	MP_ATCC.CDS.3294	MP36.CDS.2246	MP37.CDS.2276	MP38.CDS.2360	MP1.CDS.2310	MP2.CDS.2307	mp39.CDS.2245
cluster2244	H, R	Dihydroflavonol-4-reductase (EC 1.1.1.219)	MP_ATCC.CDS.2555	MP36.CDS.138	MP37.CDS.194	MP38.CDS.194	MP1.CDS.202	MP2.CDS.201	mp39.CDS.135
cluster655	R	Dihydrofolate reductase (EC 1.5.1.3)	MP_ATCC.CDS.696	MP36.CDS.3022	MP37.CDS.3052	MP38.CDS.3075	MP1.CDS.3079	MP2.CDS.3806	mp39.CDS.3037
cluster1429	R	Dihydrofolate synthase (EC 6.3.2.12) @ Folylpolyglutamate synthase (EC 6.3.2.17)	MP_ATCC.CDS.1605	MP36.CDS.2684	MP37.CDS.2715	MP38.CDS.2792	MP1.CDS.2744	MP2.CDS.2739	mp39.CDS.2709
cluster1469	R	Dihydrolipoamide acyltransferase component of branched-chain alpha-keto acid dehydrogenase complex (EC 2.3.1.168)	MP_ATCC.CDS.1653	MP36.CDS.2734	MP37.CDS.2766	MP38.CDS.2843	MP1.CDS.2795	MP2.CDS.2789	mp39.CDS.2762
cluster383	R	Dihydrolipoamide acyltransferase component of branched-chain alpha-keto acid dehydrogenase complex (EC 2.3.1.168)	MP_ATCC.CDS.374	MP36.CDS.2418	MP37.CDS.2448	MP38.CDS.2528	MP1.CDS.2482	MP2.CDS.2478	mp39.CDS.2442
cluster1784	R	Dihydrolipoamide dehydrogenase (EC 1.8.1.4)	MP_ATCC.CDS.2005	MP36.CDS.3626	MP37.CDS.3656	MP38.CDS.3678	MP1.CDS.3676	MP2.CDS.3203	mp39.CDS.3644
cluster3543	R	Dihydrolipoamide dehydrogenase (EC 1.8.1.4)	MP_ATCC.CDS.4059	MP36.CDS.483	MP37.CDS.542	MP38.CDS.539	MP1.CDS.546	MP2.CDS.543	mp39.CDS.484
cluster3201	R	Dihydrolipoamide succinyltransferase component (E2) of 2-oxoglutarate dehydrogenase complex (EC 2.3.1.61) / 2-oxoglutarate dehydrogenase E1 component (EC 1.2.4.2)	MP_ATCC.CDS.3674	MP36.CDS.1353	MP37.CDS.1413	MP38.CDS.1473	MP1.CDS.1423	MP2.CDS.1419	mp39.CDS.1360
cluster197	R	Dihydroneopterin aldolase (EC 4.1.2.25)	MP_ATCC.CDS.152	MP36.CDS.3949	MP37.CDS.3966	MP38.CDS.3985	MP1.CDS.3993	MP2.CDS.4005	mp39.CDS.3954
cluster2468	R	Dihydroorotase (EC 3.5.2.3)	MP_ATCC.CDS.2834	MP36.CDS.1500	MP37.CDS.1559	MP38.CDS.1629	MP1.CDS.1570	MP2.CDS.1562	mp39.CDS.1509
cluster2790	R	Dihydroorotate dehydrogenase (EC 1.3.3.1)	MP_ATCC.CDS.3203	MP36.CDS.2339	MP37.CDS.2369	MP38.CDS.2448	MP1.CDS.2403	MP2.CDS.2399	mp39.CDS.2361
cluster198	R	Dihydropteroate synthase (EC 2.5.1.15)	MP_ATCC.CDS.153	MP36.CDS.3950	MP37.CDS.3967	MP38.CDS.3986	MP1.CDS.3994	MP2.CDS.4006	mp39.CDS.3955
cluster2292	R	Dihydroxy-acid dehydratase (EC 4.2.1.9)	MP_ATCC.CDS.2610	MP36.CDS.195	MP37.CDS.249	MP38.CDS.249	MP1.CDS.257	MP2.CDS.256	mp39.CDS.191
cluster208	R	Dihydroxyacetone kinase family protein	MP_ATCC.CDS.164	MP36.CDS.3265	MP37.CDS.3293	MP38.CDS.3322	MP1.CDS.3317	MP2.CDS.3564	mp39.CDS.3282
cluster1049	S	Dimethylhistidine N-methyltransferase (EC 2.1.1.44)	MP_ATCC.CDS.1139	MP36.CDS.4048	MP37.CDS.4060	MP38.CDS.4080	MP1.CDS.4091	MP2.CDS.4101	mp39.CDS.4050
cluster1651	S	DinG family ATP-dependent helicase YoaA	MP_ATCC.CDS.1853	MP36.CDS.1445	MP37.CDS.1506	MP38.CDS.1566	MP1.CDS.1516	MP2.CDS.1508	mp39.CDS.1455
cluster558	E	Dinucleotide-utilizing enzymes involved in molybdopterin and thiamine biosynthesis family 2	MP_ATCC.CDS.575	MP36.CDS.3432	MP37.CDS.3461	MP38.CDS.3489	MP1.CDS.3483	MP2.CDS.3397	mp39.CDS.3453
cluster1008	E	Dipeptide transport ATP-binding protein DppD (TC 3.A.1.5.2)	MP_ATCC.CDS.1095	MP36.CDS.4003	MP37.CDS.4016	MP38.CDS.4036	MP1.CDS.4047	MP2.CDS.4057	mp39.CDS.4007
cluster1010	C	Dipeptide transport system permease protein DppB (TC 3.A.1.5.2)	MP_ATCC.CDS.1097	MP36.CDS.4005	MP37.CDS.4018	MP38.CDS.4038	MP1.CDS.4049	MP2.CDS.4059	mp39.CDS.4009
cluster1009	C	Dipeptide transport system permease protein DppC (TC 3.A.1.5.2)	MP_ATCC.CDS.1096	MP36.CDS.4004	MP37.CDS.4017	MP38.CDS.4037	MP1.CDS.4048	MP2.CDS.4058	mp39.CDS.4008
cluster1011	C	Dipeptide-binding ABC transporter, periplasmic substrate-binding component (TC 3.A.1.5.2)	MP_ATCC.CDS.1098	MP36.CDS.4006	MP37.CDS.4019	MP38.CDS.4039	MP1.CDS.4050	MP2.CDS.4060	mp39.CDS.4010
cluster1530	C	DipZ protein	MP_ATCC.CDS.1717	MP36.CDS.3153	MP37.CDS.3182	MP38.CDS.3209	MP1.CDS.3210	MP2.CDS.3674	mp39.CDS.3167
cluster3030	S	Disease resistance domain-containing protein	MP_ATCC.CDS.3486	MP36.CDS.957	MP37.CDS.1022	MP38.CDS.1022	MP1.CDS.1028	MP2.CDS.1029	mp39.CDS.962
cluster3423	K	Division initiation protein	MP_ATCC.CDS.3929	MP36.CDS.1989	MP37.CDS.2026	MP38.CDS.2111	MP1.CDS.2055	MP2.CDS.2053	mp39.CDS.1989
cluster292	L	DNA binding domain, excisionase family	MP_ATCC.CDS.266	MP36.CDS.2526	MP37.CDS.2557	MP38.CDS.2632	MP1.CDS.2586	MP2.CDS.2582	mp39.CDS.2548
cluster3174	L	DNA double-strand break repair protein Mre11	MP_ATCC.CDS.3643	MP36.CDS.1383	MP37.CDS.1447	MP38.CDS.1506	MP1.CDS.1454	MP2.CDS.1449	mp39.CDS.1394
cluster3173	L	DNA double-strand break repair Rad50 ATPase	MP_ATCC.CDS.3642	MP36.CDS.1384	MP37.CDS.1448	MP38.CDS.1507	MP1.CDS.1455	MP2.CDS.1450	mp39.CDS.1395
cluster1343	L	DNA gyrase subunit A (EC 5.99.1.3)	MP_ATCC.CDS.1497	MP36.CDS.4298	MP37.CDS.43	MP38.CDS.43	MP1.CDS.52	MP2.CDS.52	mp39.CDS.4264
cluster1342	L	DNA gyrase subunit B (EC 5.99.1.3)	MP_ATCC.CDS.1496	MP36.CDS.4297	MP37.CDS.42	MP38.CDS.42	MP1.CDS.51	MP2.CDS.51	mp39.CDS.4263
cluster178	L	DNA integrity scanning protein disA	MP_ATCC.CDS.132	MP36.CDS.3927	MP37.CDS.3945	MP38.CDS.3963	MP1.CDS.3977	MP2.CDS.2902	mp39.CDS.3933
cluster448	L	DNA internalization-related competence protein ComEC/Rec2	MP_ATCC.CDS.449	MP36.CDS.2644	MP37.CDS.2674	MP38.CDS.2751	MP1.CDS.2704	MP2.CDS.2699	mp39.CDS.2667
cluster5387	L	DNA internalization-related competence protein ComEC/Rec2		MP36.CDS.2645
cluster3359	L	DNA ligase (EC 6.5.1.2)	MP_ATCC.CDS.3859	MP36.CDS.3306	MP37.CDS.3337	MP38.CDS.3364	MP1.CDS.3358	MP2.CDS.3522	mp39.CDS.3326
cluster1745	L	DNA methylase	MP_ATCC.CDS.1963	MP36.CDS.3585	MP37.CDS.3615	MP38.CDS.3637	MP1.CDS.3635	MP2.CDS.3244	mp39.CDS.3603
cluster1489	L	DNA or RNA helicases of superfamily II	MP_ATCC.CDS.1674	MP36.CDS.3197	MP37.CDS.3226	MP38.CDS.3253	MP1.CDS.3254	MP2.CDS.3630	mp39.CDS.3211
cluster3676	L	DNA or RNA helicases of superfamily II	MP_ATCC.CDS.4211	MP36.CDS.1283	MP37.CDS.1343	MP38.CDS.1399	MP1.CDS.1351	MP2.CDS.1348	mp39.CDS.1289
cluster1850	L	DNA polymerase I (EC 2.7.7.7)	MP_ATCC.CDS.2076	MP36.CDS.1759	MP37.CDS.1801	MP38.CDS.1881	MP1.CDS.1823	MP2.CDS.1801	mp39.CDS.1760
cluster3282	L	DNA polymerase III alpha subunit (EC 2.7.7.7)	MP_ATCC.CDS.3762	MP36.CDS.3697	MP37.CDS.3727	MP38.CDS.3749	MP1.CDS.3747	MP2.CDS.3132	mp39.CDS.3716
cluster94	L	DNA polymerase III alpha subunit (EC 2.7.7.7)	MP_ATCC.CDS.29	MP36.CDS.1689	MP37.CDS.1732	MP38.CDS.1810	MP1.CDS.1754	MP2.CDS.1730	mp39.CDS.1691
cluster1339	L	DNA polymerase III beta subunit (EC 2.7.7.7)	MP_ATCC.CDS.1493	MP36.CDS.4294	MP37.CDS.39	MP38.CDS.39	MP1.CDS.48	MP2.CDS.48	mp39.CDS.4260
cluster990	L	DNA polymerase III delta prime subunit (EC 2.7.7.7)	MP_ATCC.CDS.1072	MP36.CDS.3979	MP37.CDS.3995	MP38.CDS.4014	MP1.CDS.4025	MP2.CDS.4035	mp39.CDS.3986
cluster449	L	DNA polymerase III delta subunit (EC 2.7.7.7)	MP_ATCC.CDS.450	MP36.CDS.2643	MP37.CDS.2673	MP38.CDS.2750	MP1.CDS.2703	MP2.CDS.2698	mp39.CDS.2666
cluster1060	L	DNA polymerase III epsilon subunit (EC 2.7.7.7)	MP_ATCC.CDS.1151	MP36.CDS.4060	MP37.CDS.4072	MP38.CDS.4092	MP1.CDS.4103	MP2.CDS.4113	mp39.CDS.4062
cluster406	L	DNA polymerase III epsilon subunit-related protein MSMEG4261	MP_ATCC.CDS.397	MP36.CDS.2393	MP37.CDS.2424	MP38.CDS.2503	MP1.CDS.2457	MP2.CDS.2454	mp39.CDS.2417
cluster1070	L	DNA polymerase III subunits gamma and tau (EC 2.7.7.7)	MP_ATCC.CDS.1161	MP36.CDS.4070	MP37.CDS.4082	MP38.CDS.4102	MP1.CDS.4113	MP2.CDS.4123	mp39.CDS.4072
cluster103	L	DNA polymerase IV (EC 2.7.7.7)	MP_ATCC.CDS.39	MP36.CDS.1678	MP37.CDS.1721	MP38.CDS.1799	MP1.CDS.1743	MP2.CDS.1719	mp39.CDS.1680
cluster3262	L	DNA polymerase IV-like protein ImuB	MP_ATCC.CDS.3740	MP36.CDS.3720	MP37.CDS.3750	MP38.CDS.3771	MP1.CDS.3769	MP2.CDS.3109	mp39.CDS.3739
cluster2627	L	DNA polymerase-like protein MT3142	MP_ATCC.CDS.3017	MP36.CDS.3347	MP37.CDS.3379	MP38.CDS.3407	MP1.CDS.3400	MP2.CDS.3480	mp39.CDS.3369
cluster2158	L	DNA primase (EC 2.7.7.-)	MP_ATCC.CDS.2447	MP36.CDS.2908	MP37.CDS.2940	MP38.CDS.2962	MP1.CDS.2967	MP2.CDS.3919	mp39.CDS.2934
cluster238	L	DNA primase (EC 2.7.7.-)	MP_ATCC.CDS.200	MP36.CDS.2564	MP37.CDS.2596	MP38.CDS.2670	MP1.CDS.2625	MP2.CDS.2620	mp39.CDS.2586
cluster1340	L	DNA recombination and repair protein RecF	MP_ATCC.CDS.1494	MP36.CDS.4295	MP37.CDS.40	MP38.CDS.40	MP1.CDS.49	MP2.CDS.49	mp39.CDS.4261
cluster500	L	DNA recombination and repair protein RecO	MP_ATCC.CDS.509	MP36.CDS.2582	MP37.CDS.2615	MP38.CDS.2689	MP1.CDS.2643	MP2.CDS.2638	mp39.CDS.2606
cluster2998	L	DNA repair helicase	MP_ATCC.CDS.3447	MP36.CDS.918	MP37.CDS.982	MP38.CDS.984	MP1.CDS.987	MP2.CDS.989	mp39.CDS.923
cluster177	L	DNA repair protein RadA	MP_ATCC.CDS.131	MP36.CDS.3926	MP37.CDS.3944	MP38.CDS.3962	MP1.CDS.3976	MP2.CDS.2903	mp39.CDS.3932
cluster1911	L	DNA repair protein RecN	MP_ATCC.CDS.2149	MP36.CDS.1835	MP37.CDS.1872	MP38.CDS.1953	MP1.CDS.1897	MP2.CDS.1874	mp39.CDS.1836
cluster992	L	DNA topoisomerase I (EC 5.99.1.2)	MP_ATCC.CDS.1074	MP36.CDS.3981	MP37.CDS.3997	MP38.CDS.4016	MP1.CDS.4027	MP2.CDS.4037	mp39.CDS.3988
cluster641	L	DNA translocase FtsK	MP_ATCC.CDS.680	MP36.CDS.3006	MP37.CDS.3036	MP38.CDS.3059	MP1.CDS.3063	MP2.CDS.3822	mp39.CDS.3021
cluster3241	L	DNA-3-methyladenine glycosylase (EC 3.2.2.20)	MP_ATCC.CDS.3714	MP36.CDS.1311	MP37.CDS.1373	MP38.CDS.1431	MP1.CDS.1381	MP2.CDS.1377	mp39.CDS.1318
cluster1903	L	DNA-3-methyladenine glycosylase II (EC 3.2.2.21)	MP_ATCC.CDS.2140	MP36.CDS.1826	MP37.CDS.1863	MP38.CDS.1944	MP1.CDS.1888	MP2.CDS.1865	mp39.CDS.1827
cluster2778	L	DNA-binding protein	MP_ATCC.CDS.3189	MP36.CDS.2754	MP37.CDS.2788	MP38.CDS.2865	MP1.CDS.2816	MP2.CDS.2810	mp39.CDS.2784
cluster3387	L	DNA-binding protein HU / low-complexity, AKP-rich domain	MP_ATCC.CDS.3890	MP36.CDS.3277	MP37.CDS.3305	MP38.CDS.3334	MP1.CDS.3329	MP2.CDS.3552	mp39.CDS.3295
cluster2740	L	DNA-binding protein, CopG family	MP_ATCC.CDS.3149	MP36.CDS.2794	MP37.CDS.2828	MP38.CDS.2906	MP1.CDS.2858	MP2.CDS.2851	mp39.CDS.2824
cluster2744	L	DNA-binding protein, CopG family	MP_ATCC.CDS.3153	MP36.CDS.2790	MP37.CDS.2824	MP38.CDS.2902	MP1.CDS.2854	MP2.CDS.2847	mp39.CDS.2820
cluster2799	L	DNA-binding protein, CopG family	MP_ATCC.CDS.3212	MP36.CDS.2330	MP37.CDS.2360	MP38.CDS.2439	MP1.CDS.2394	MP2.CDS.2390	mp39.CDS.2352
cluster3039	L	DNA-binding response regulator	MP_ATCC.CDS.3495	MP36.CDS.966	MP37.CDS.1031	MP38.CDS.1031	MP1.CDS.1037	MP2.CDS.1038	mp39.CDS.971
cluster946	L	DNA-binding response regulator	MP_ATCC.CDS.1025	MP36.CDS.808	MP37.CDS.871	MP38.CDS.874	MP1.CDS.877	MP2.CDS.877	mp39.CDS.815
cluster2497	L	DNA-binding response regulator KdpE	MP_ATCC.CDS.2870	MP36.CDS.1102	MP37.CDS.1168	MP38.CDS.1225	MP1.CDS.1176	MP2.CDS.1174	mp39.CDS.1114
cluster1728	L	DNA-binding response regulator mtrA	MP_ATCC.CDS.1945	MP36.CDS.3566	MP37.CDS.3597	MP38.CDS.3619	MP1.CDS.3617	MP2.CDS.3263	mp39.CDS.3585
cluster2981	L	DNA-binding response regulator, LuxR family	MP_ATCC.CDS.3429	MP36.CDS.900	MP37.CDS.964	MP38.CDS.966	MP1.CDS.969	MP2.CDS.971	mp39.CDS.905
cluster3329	L	DNA-dependent DNA polymerase beta chain	MP_ATCC.CDS.3818	MP36.CDS.4220	MP37.CDS.4232	MP38.CDS.4252	MP1.CDS.4261	MP2.CDS.4273	mp39.CDS.4197
cluster2585	K	DNA-directed RNA polymerase alpha subunit (EC 2.7.7.6)	MP_ATCC.CDS.2972	MP36.CDS.3796	MP37.CDS.3814	MP38.CDS.3844	MP1.CDS.3845	MP2.CDS.3035	mp39.CDS.3800
cluster854	K	DNA-directed RNA polymerase beta subunit (EC 2.7.7.6)	MP_ATCC.CDS.921	MP36.CDS.710	MP37.CDS.770	MP38.CDS.767	MP1.CDS.777	MP2.CDS.776	mp39.CDS.714
cluster855	K	DNA-directed RNA polymerase beta' subunit (EC 2.7.7.6)	MP_ATCC.CDS.922	MP36.CDS.711	MP37.CDS.771	MP38.CDS.768	MP1.CDS.778	MP2.CDS.777	mp39.CDS.715
cluster2459	K	DNA-directed RNA polymerase omega subunit (EC 2.7.7.6)	MP_ATCC.CDS.2824	MP36.CDS.1511	MP37.CDS.1569	MP38.CDS.1639	MP1.CDS.1580	MP2.CDS.1572	mp39.CDS.1519
cluster237	K	dNTP triphosphohydrolase, broad substrate specificity	MP_ATCC.CDS.199	MP36.CDS.2565	MP37.CDS.2597	MP38.CDS.2671	MP1.CDS.2626	MP2.CDS.2621	mp39.CDS.2587
cluster1611	S	DoxX family protein	MP_ATCC.CDS.1809	MP36.CDS.3825	MP37.CDS.3841	MP38.CDS.3861	MP1.CDS.3872	MP2.CDS.3008	mp39.CDS.3827
cluster270	V	Drug resistance transporter, EmrB/QacA subfamily	MP_ATCC.CDS.240	MP36.CDS.2552	MP37.CDS.2583	MP38.CDS.2658	MP1.CDS.2612	MP2.CDS.2608	mp39.CDS.2574
cluster2592	M	dTDP-4-dehydrorhamnose 3,5-epimerase (EC 5.1.3.13)	MP_ATCC.CDS.2979	MP36.CDS.3803	MP37.CDS.3821	MP38.CDS.3851	MP1.CDS.3852	MP2.CDS.3028	mp39.CDS.3807
cluster1748	M	dTDP-4-dehydrorhamnose reductase (EC 1.1.1.133)	MP_ATCC.CDS.1966	MP36.CDS.3588	MP37.CDS.3618	MP38.CDS.3640	MP1.CDS.3638	MP2.CDS.3241	mp39.CDS.3606
cluster1129	M	dTDP-glucose 4,6-dehydratase (EC 4.2.1.46)	MP_ATCC.CDS.1228	MP36.CDS.4138	MP37.CDS.4149	MP38.CDS.4170	MP1.CDS.4181	MP2.CDS.4191	mp39.CDS.4116
cluster1130	M	dTDP-glucose 4,6-dehydratase (EC 4.2.1.46)	MP_ATCC.CDS.1229	MP36.CDS.4139	MP37.CDS.4150	MP38.CDS.4171	MP1.CDS.4182	MP2.CDS.4192	mp39.CDS.4117
cluster2591	M	dTDP-glucose 4,6-dehydratase (EC 4.2.1.46)	MP_ATCC.CDS.2978	MP36.CDS.3802	MP37.CDS.3820	MP38.CDS.3850	MP1.CDS.3851	MP2.CDS.3029	mp39.CDS.3806
cluster1747	M	dTDP-Rha:A-D-GlcNAc-diphosphoryl polyprenol, A-3-L-rhamnosyl transferase WbbL	MP_ATCC.CDS.1965	MP36.CDS.3587	MP37.CDS.3617	MP38.CDS.3639	MP1.CDS.3637	MP2.CDS.3242	mp39.CDS.3605
cluster2877	S	DUF1794	MP_ATCC.CDS.3309	MP36.CDS.865	MP37.CDS.928	MP38.CDS.931	MP1.CDS.934	MP2.CDS.936	mp39.CDS.871
cluster617	S	DUF1794	MP_ATCC.CDS.644	MP36.CDS.2970	MP37.CDS.3001	MP38.CDS.3024	MP1.CDS.3026	MP2.CDS.3858	mp39.CDS.2994
cluster1648	S	DUF2017 domain-containing protein	MP_ATCC.CDS.1850	MP36.CDS.1448	MP37.CDS.1509	MP38.CDS.1569	MP1.CDS.1519	MP2.CDS.1511	mp39.CDS.1458
cluster1555	S	ElaA protein	MP_ATCC.CDS.1746	MP36.CDS.3123	MP37.CDS.3153	MP38.CDS.3180	MP1.CDS.3181	MP2.CDS.3704	mp39.CDS.3138
cluster2520	V	elastin	MP_ATCC.CDS.2898	MP36.CDS.1076	MP37.CDS.1141	MP38.CDS.1197	MP1.CDS.1149	MP2.CDS.1147	mp39.CDS.1087
cluster3830	K	elastin	MP_ATCC.CDS.2897	MP36.CDS.1077	MP37.CDS.1142	MP38.CDS.1198	MP1.CDS.1150	MP2.CDS.1148
cluster4673	S	elastin							mp39.CDS.1088
cluster2597	H	Electron transfer flavoprotein, alpha subunit	MP_ATCC.CDS.2985	MP36.CDS.3316	MP37.CDS.3348	MP38.CDS.3375	MP1.CDS.3369	MP2.CDS.3511	mp39.CDS.3337
cluster2598	H	Electron transfer flavoprotein, beta subunit	MP_ATCC.CDS.2986	MP36.CDS.3317	MP37.CDS.3349	MP38.CDS.3376	MP1.CDS.3370	MP2.CDS.3510	mp39.CDS.3338
cluster2225	H	Elongation factor G-like protein TM_1651	MP_ATCC.CDS.2533	MP36.CDS.115	MP37.CDS.172	MP38.CDS.172	MP1.CDS.180	MP2.CDS.179	mp39.CDS.114
cluster14	V	EmrB/QacA family drug resistance transporter	MP_ATCC.CDS.1170;MP_ATCC.CDS.1937	MP36.CDS.3558;MP36.CDS.4079	MP37.CDS.3589;MP37.CDS.4091	MP38.CDS.3611;MP38.CDS.4111	MP1.CDS.3609;MP1.CDS.4122	MP2.CDS.3271;MP2.CDS.4132	mp39.CDS.3577;mp39.CDS.4081
cluster1560	V	EmrB/QacA family drug resistance transporter	MP_ATCC.CDS.1751	MP36.CDS.3118	MP37.CDS.3148	MP38.CDS.3175	MP1.CDS.3176	MP2.CDS.3709	mp39.CDS.3133
cluster3472	V	EmrB/QacA family drug resistance transporter	MP_ATCC.CDS.3982	MP36.CDS.2046	MP37.CDS.2082	MP38.CDS.2164	MP1.CDS.2111	MP2.CDS.2109	mp39.CDS.2041
cluster2891	V	Encapsulating protein for a DyP-type peroxidase or ferritin-like protein oligomers	MP_ATCC.CDS.3323	MP36.CDS.851	MP37.CDS.914	MP38.CDS.917	MP1.CDS.920	MP2.CDS.922	mp39.CDS.857
cluster1168	G	Endoglucanase A precursor (EC 3.2.1.4)	MP_ATCC.CDS.1273	MP36.CDS.47	MP37.CDS.104	MP38.CDS.103	MP1.CDS.113	MP2.CDS.113	mp39.CDS.47
cluster1019	L	Endonuclease III (EC 4.2.99.18)	MP_ATCC.CDS.1107	MP36.CDS.4015	MP37.CDS.4029	MP38.CDS.4048	MP1.CDS.4059	MP2.CDS.4068	mp39.CDS.4018
cluster857	L	Endonuclease IV (EC 3.1.21.2)	MP_ATCC.CDS.925	MP36.CDS.714	MP37.CDS.774	MP38.CDS.771	MP1.CDS.781	MP2.CDS.780	mp39.CDS.718
cluster1443	L	Endonuclease VIII	MP_ATCC.CDS.1623	MP36.CDS.2702	MP37.CDS.2733	MP38.CDS.2810	MP1.CDS.2761	MP2.CDS.2757	mp39.CDS.2728
cluster1779	L	Endonuclease VIII	MP_ATCC.CDS.1999	MP36.CDS.3620	MP37.CDS.3650	MP38.CDS.3672	MP1.CDS.3670	MP2.CDS.3209	mp39.CDS.3638
cluster446	U	Enhanced intracellular survival protein	MP_ATCC.CDS.446	MP36.CDS.2648	MP37.CDS.2678	MP38.CDS.2755	MP1.CDS.2708	MP2.CDS.2703	mp39.CDS.2671
cluster2502	E	Enolase (EC 4.2.1.11)	MP_ATCC.CDS.2876	MP36.CDS.1096	MP37.CDS.1162	MP38.CDS.1219	MP1.CDS.1170	MP2.CDS.1168	mp39.CDS.1108
cluster131	I	Enoyl coenzyme A hydratase IgrE	MP_ATCC.CDS.82	MP36.CDS.3879	MP37.CDS.3896	MP38.CDS.3915	MP1.CDS.3928	MP2.CDS.2950	mp39.CDS.3884
cluster1350	I	Enoyl-[acyl-carrier-protein] reductase [FMN] (EC 1.3.1.9)	MP_ATCC.CDS.1516	MP36.CDS.5	MP37.CDS.61	MP38.CDS.61	MP1.CDS.71	MP2.CDS.70	mp39.CDS.4
cluster2035	I	Enoyl-[acyl-carrier-protein] reductase [NADH] (EC 1.3.1.9)	MP_ATCC.CDS.2287	MP36.CDS.1616	MP37.CDS.1662	MP38.CDS.1739	MP1.CDS.1683	MP2.CDS.1674	mp39.CDS.1626
cluster1120	I	Enoyl-CoA hydratase	MP_ATCC.CDS.1218	MP36.CDS.4128	MP37.CDS.4139	MP38.CDS.4160	MP1.CDS.4171	MP2.CDS.4181	mp39.CDS.2316
cluster3267	I	Enoyl-CoA hydratase	MP_ATCC.CDS.3745	MP36.CDS.3715	MP37.CDS.3745	MP38.CDS.3766	MP1.CDS.3764	MP2.CDS.3114	mp39.CDS.3734
cluster860	I	Enoyl-CoA hydratase	MP_ATCC.CDS.928	MP36.CDS.717	MP37.CDS.777	MP38.CDS.774	MP1.CDS.784	MP2.CDS.783	mp39.CDS.721
cluster1283	I	Enoyl-CoA hydratase (EC 4.2.1.17)	MP_ATCC.CDS.1417	MP36.CDS.1233	MP37.CDS.1295	MP38.CDS.1350	MP1.CDS.1302	MP2.CDS.1300	mp39.CDS.1241
cluster1289	I	Enoyl-CoA hydratase (EC 4.2.1.17)	MP_ATCC.CDS.1423	MP36.CDS.1239	MP37.CDS.1301	MP38.CDS.1356	MP1.CDS.1308	MP2.CDS.1306	mp39.CDS.1247
cluster1290	I	Enoyl-CoA hydratase (EC 4.2.1.17)	MP_ATCC.CDS.1424	MP36.CDS.1240	MP37.CDS.1302	MP38.CDS.1357	MP1.CDS.1309	MP2.CDS.1307	mp39.CDS.1248
cluster1462	I	Enoyl-CoA hydratase (EC 4.2.1.17)	MP_ATCC.CDS.1644	MP36.CDS.2723	MP37.CDS.2756	MP38.CDS.2833	MP1.CDS.2784	MP2.CDS.2779	mp39.CDS.2751
cluster1575	I	Enoyl-CoA hydratase (EC 4.2.1.17)	MP_ATCC.CDS.1768	MP36.CDS.3100	MP37.CDS.3130	MP38.CDS.3157	MP1.CDS.3158	MP2.CDS.3727	mp39.CDS.3115
cluster1981	I	Enoyl-CoA hydratase (EC 4.2.1.17)	MP_ATCC.CDS.2226	MP36.CDS.2115	MP37.CDS.2150	MP38.CDS.2231	MP1.CDS.2179	MP2.CDS.2178	mp39.CDS.2111
cluster2047	I	Enoyl-CoA hydratase (EC 4.2.1.17)	MP_ATCC.CDS.2299	MP36.CDS.1603	MP37.CDS.1649	MP38.CDS.1726	MP1.CDS.1670	MP2.CDS.1661	mp39.CDS.1613
cluster2609	I	Enoyl-CoA hydratase (EC 4.2.1.17)	MP_ATCC.CDS.2997	MP36.CDS.3328	MP37.CDS.3360	MP38.CDS.3387	MP1.CDS.3381	MP2.CDS.3499	mp39.CDS.3349
cluster3041	I	Enoyl-CoA hydratase (EC 4.2.1.17)	MP_ATCC.CDS.3497	MP36.CDS.968	MP37.CDS.1033	MP38.CDS.1033	MP1.CDS.1039	MP2.CDS.1040	mp39.CDS.973
cluster3279	I	Enoyl-CoA hydratase (EC 4.2.1.17)	MP_ATCC.CDS.3758	MP36.CDS.3701	MP37.CDS.3731	MP38.CDS.3753	MP1.CDS.3751	MP2.CDS.3128	mp39.CDS.3720
cluster3550	I	Enoyl-CoA hydratase (EC 4.2.1.17)	MP_ATCC.CDS.4067	MP36.CDS.475	MP37.CDS.533	MP38.CDS.531	MP1.CDS.538	MP2.CDS.535	mp39.CDS.476
cluster434	I	Enoyl-CoA hydratase (EC 4.2.1.17)	MP_ATCC.CDS.431	MP36.CDS.3851	MP37.CDS.3868	MP38.CDS.3887	MP1.CDS.3900	MP2.CDS.2978	mp39.CDS.3856
cluster582	I	Enoyl-CoA hydratase (EC 4.2.1.17)	MP_ATCC.CDS.603	MP36.CDS.2932	MP37.CDS.2962	MP38.CDS.2985	MP1.CDS.2988	MP2.CDS.3897	mp39.CDS.2955
cluster819	I	Enoyl-CoA hydratase (EC 4.2.1.17)	MP_ATCC.CDS.882	MP36.CDS.671	MP37.CDS.730	MP38.CDS.728	MP1.CDS.737	MP2.CDS.736	mp39.CDS.674
cluster862	I	Enoyl-CoA hydratase (EC 4.2.1.17)	MP_ATCC.CDS.930	MP36.CDS.719	MP37.CDS.779	MP38.CDS.776	MP1.CDS.786	MP2.CDS.785	mp39.CDS.723
cluster2997	I	Enoyl-CoA hydratase [isoleucine degradation] (EC 4.2.1.17) / 3-hydroxyacyl-CoA dehydrogenase (EC 1.1.1.35) / 3-hydroxybutyryl-CoA epimerase (EC 5.1.2.3)	MP_ATCC.CDS.3446	MP36.CDS.917	MP37.CDS.981	MP38.CDS.983	MP1.CDS.986	MP2.CDS.988	mp39.CDS.922
cluster1218	I	Enoyl-CoA hydratase [valine degradation] (EC 4.2.1.17)	MP_ATCC.CDS.1341	MP36.CDS.1155	MP37.CDS.1217	MP38.CDS.1275	MP1.CDS.1224	MP2.CDS.1222	mp39.CDS.1163
cluster30	R	Enterobactin synthetase component F (EC 2.7.7.-)	MP_ATCC.CDS.2512;MP_ATCC.CDS.3108	MP36.CDS.2835;MP36.CDS.93	MP37.CDS.152;MP37.CDS.2869	MP38.CDS.1143;MP38.CDS.150	MP1.CDS.160;MP1.CDS.2898	MP2.CDS.159;MP2.CDS.2892	mp39.CDS.2862;mp39.CDS.92
cluster484	R	Enterobactin synthetase component F (EC 2.7.7.-)	MP_ATCC.CDS.490	MP36.CDS.2601	MP37.CDS.2633	MP38.CDS.2708	MP1.CDS.2662	MP2.CDS.2657	mp39.CDS.2625
cluster485	R	Enterobactin synthetase component F (EC 2.7.7.-)	MP_ATCC.CDS.491	MP36.CDS.2600	MP37.CDS.2632	MP38.CDS.2707	MP1.CDS.2661	MP2.CDS.2656	mp39.CDS.2624
cluster2239	R	epoxide hydrolase	MP_ATCC.CDS.2550	MP36.CDS.133	MP37.CDS.189	MP38.CDS.189	MP1.CDS.197	MP2.CDS.196	mp39.CDS.130
cluster2016	R	Epoxide hydrolase (EC 3.3.2.9)	MP_ATCC.CDS.2265	MP36.CDS.3480	MP37.CDS.3509	MP38.CDS.3535	MP1.CDS.3531	MP2.CDS.3350	mp39.CDS.3500
cluster2762	R	ERCC4-type nuclease	MP_ATCC.CDS.3173	MP36.CDS.2770	MP37.CDS.2804	MP38.CDS.2882	MP1.CDS.2833	MP2.CDS.2826	mp39.CDS.2800
cluster3132	R	Erythromycin esterase homolog	MP_ATCC.CDS.3596	MP36.CDS.2217	MP37.CDS.2249	MP38.CDS.2330	MP1.CDS.2280	MP2.CDS.2279	mp39.CDS.2214
cluster1320	V	Esat-6 like protein EsxE	MP_ATCC.CDS.1473	MP36.CDS.4274	MP37.CDS.19	MP38.CDS.19	MP1.CDS.28	MP2.CDS.28	mp39.CDS.4240
cluster2111	S	ESAT-6-like protein EsxH, 10 kDa antigen CFP7	MP_ATCC.CDS.2378	MP36.CDS.299	MP37.CDS.354	MP38.CDS.355	MP1.CDS.362	MP2.CDS.360	mp39.CDS.297
cluster5482	S	ESAT-6-like protein EsxL				MP38.CDS.1419
cluster3356	S	ESAT-6-like protein EsxQ	MP_ATCC.CDS.3856	MP36.CDS.3309	MP37.CDS.3340	MP38.CDS.3367	MP1.CDS.3361	MP2.CDS.3519	mp39.CDS.3329
cluster1224	I	esterase	MP_ATCC.CDS.1347	MP36.CDS.1161	MP37.CDS.1223	MP38.CDS.1281	MP1.CDS.1230	MP2.CDS.1228	mp39.CDS.1169
cluster1442	I	Esterase A	MP_ATCC.CDS.1622	MP36.CDS.2701	MP37.CDS.2732	MP38.CDS.2809	MP1.CDS.2760	MP2.CDS.2756	mp39.CDS.2726
cluster1993	I	Esterase A	MP_ATCC.CDS.2239	MP36.CDS.2102	MP37.CDS.2137	MP38.CDS.2218	MP1.CDS.2166	MP2.CDS.2165	mp39.CDS.2098
cluster1994	I	Esterase A	MP_ATCC.CDS.2240	MP36.CDS.2101	MP37.CDS.2136	MP38.CDS.2217	MP1.CDS.2165	MP2.CDS.2164	mp39.CDS.2097
cluster2389	I	Esterase A	MP_ATCC.CDS.2722	MP36.CDS.1631	MP37.CDS.1677	MP38.CDS.1754	MP1.CDS.1698	MP2.CDS.1689	mp39.CDS.1641
cluster2318	I	Esterase LipW	MP_ATCC.CDS.2641	MP36.CDS.225	MP37.CDS.278	MP38.CDS.280	MP1.CDS.286	MP2.CDS.286	mp39.CDS.221
cluster3163	I	esterase, putative	MP_ATCC.CDS.3630	MP36.CDS.1395	MP37.CDS.1459	MP38.CDS.1518	MP1.CDS.1466	MP2.CDS.1461	mp39.CDS.1406
cluster1610	I	Esterase/lipase	MP_ATCC.CDS.1808	MP36.CDS.3826	MP37.CDS.3842	MP38.CDS.3862	MP1.CDS.3873	MP2.CDS.3007	mp39.CDS.3828
cluster2450	I	Esterase/lipase	MP_ATCC.CDS.2813	MP36.CDS.1521	MP37.CDS.1580	MP38.CDS.1650	MP1.CDS.1591	MP2.CDS.1583	mp39.CDS.1530
cluster2451	I	Esterase/lipase	MP_ATCC.CDS.2814	MP36.CDS.1520	MP37.CDS.1579	MP38.CDS.1649	MP1.CDS.1590	MP2.CDS.1582	mp39.CDS.1529
cluster2653	I	Esterase/lipase	MP_ATCC.CDS.3046	MP36.CDS.3377	MP37.CDS.3408	MP38.CDS.3437	MP1.CDS.3430	MP2.CDS.3450	mp39.CDS.3400
cluster3582	I	Esterase/lipase/thioesterase family active site	MP_ATCC.CDS.4104	MP36.CDS.438	MP37.CDS.495	MP38.CDS.494	MP1.CDS.501	MP2.CDS.498	mp39.CDS.439
cluster1860	L	Excinuclease ABC subunit A	MP_ATCC.CDS.2089	MP36.CDS.1771	MP37.CDS.1812	MP38.CDS.1893	MP1.CDS.1835	MP2.CDS.1813	mp39.CDS.1771
cluster1854	L	Excinuclease ABC subunit B	MP_ATCC.CDS.2082	MP36.CDS.1764	MP37.CDS.1805	MP38.CDS.1886	MP1.CDS.1828	MP2.CDS.1806	mp39.CDS.1765
cluster2430	L	Excinuclease ABC subunit C	MP_ATCC.CDS.2793	MP36.CDS.1541	MP37.CDS.1600	MP38.CDS.1670	MP1.CDS.1611	MP2.CDS.1603	mp39.CDS.1551
cluster1094	L	Excisionase	MP_ATCC.CDS.1192	MP36.CDS.4102	MP37.CDS.4113	MP38.CDS.4134	MP1.CDS.4145	MP2.CDS.4155	mp39.CDS.4104
cluster1153	L	excisionase, putative	MP_ATCC.CDS.1258	MP36.CDS.525	MP37.CDS.585	MP38.CDS.582	MP1.CDS.589	MP2.CDS.587	mp39.CDS.527
cluster3577	S	Exodeoxyribonuclease III (EC 3.1.11.2)	MP_ATCC.CDS.4098	MP36.CDS.444	MP37.CDS.501	MP38.CDS.500	MP1.CDS.507	MP2.CDS.504	mp39.CDS.445
cluster816	S	Exodeoxyribonuclease V alpha chain (EC 3.1.11.5)	MP_ATCC.CDS.879	MP36.CDS.668	MP37.CDS.727	MP38.CDS.725	MP1.CDS.734	MP2.CDS.733	mp39.CDS.671
cluster817	S	Exodeoxyribonuclease V beta chain (EC 3.1.11.5)	MP_ATCC.CDS.880	MP36.CDS.669	MP37.CDS.728	MP38.CDS.726	MP1.CDS.735	MP2.CDS.734	mp39.CDS.672
cluster818	S	Exodeoxyribonuclease V gamma chain (EC 3.1.11.5)	MP_ATCC.CDS.881	MP36.CDS.670	MP37.CDS.729	MP38.CDS.727	MP1.CDS.736	MP2.CDS.735	mp39.CDS.673
cluster1255	S	Exodeoxyribonuclease VII large subunit (EC 3.1.11.6)	MP_ATCC.CDS.1383	MP36.CDS.1200	MP37.CDS.1262	MP38.CDS.1319	MP1.CDS.1270	MP2.CDS.1267	mp39.CDS.1208
cluster1254	S	Exodeoxyribonuclease VII small subunit (EC 3.1.11.6)	MP_ATCC.CDS.1382	MP36.CDS.1199	MP37.CDS.1261	MP38.CDS.1318	MP1.CDS.1269	MP2.CDS.1266	mp39.CDS.1207
cluster2870	I	Exoenzymes regulatory protein AepA in lipid-linked oligosaccharide synthesis cluster	MP_ATCC.CDS.3296	MP36.CDS.2244	MP37.CDS.2274	MP38.CDS.2358	MP1.CDS.2308	MP2.CDS.2305	mp39.CDS.2243
cluster741	I	Exoenzymes regulatory protein AepA precursor	MP_ATCC.CDS.796	MP36.CDS.584	MP37.CDS.643	MP38.CDS.641	MP1.CDS.649	MP2.CDS.646	mp39.CDS.587
cluster1158	I	Exopolyphosphatase (EC 3.6.1.11)	MP_ATCC.CDS.1263	MP36.CDS.520	MP37.CDS.580	MP38.CDS.577	MP1.CDS.584	MP2.CDS.582	mp39.CDS.522
cluster4332	S	Exopolyphosphatase (EC 3.6.1.11)		MP36.CDS.1100
cluster3729	M	Exported repetitive protein (Cell surface protein PirG)	MP_ATCC.CDS.4274	MP36.CDS.4164	MP37.CDS.4175	MP38.CDS.4196	MP1.CDS.4206	MP2.CDS.4216	mp39.CDS.4141
cluster3114	S	expressed protein	MP_ATCC.CDS.3575	MP36.CDS.1048	MP37.CDS.1110	MP38.CDS.1110	MP1.CDS.1118	MP2.CDS.1118	mp39.CDS.1055
cluster3495	S	ExtraCellular Mutant; Ecm15p	MP_ATCC.CDS.4007	MP36.CDS.2072	MP37.CDS.2107	MP38.CDS.2189	MP1.CDS.2136	MP2.CDS.2135	mp39.CDS.2066
cluster3597	I	F420-dependent glucose-6-phosphate dehydrogenase	MP_ATCC.CDS.4119	MP36.CDS.423	MP37.CDS.480	MP38.CDS.479	MP1.CDS.486	MP2.CDS.483	mp39.CDS.424
cluster1068	C	FAD/FMN-containing dehydrogenases	MP_ATCC.CDS.1159	MP36.CDS.4068	MP37.CDS.4080	MP38.CDS.4100	MP1.CDS.4111	MP2.CDS.4121	mp39.CDS.4070
cluster2267	C	FAD/FMN-containing dehydrogenases	MP_ATCC.CDS.2581	MP36.CDS.165	MP37.CDS.220	MP38.CDS.220	MP1.CDS.228	MP2.CDS.227	mp39.CDS.162
cluster5832	C	FAD/FMN-containing dehydrogenases		MP36.CDS.166
cluster150	C	FadE30	MP_ATCC.CDS.101	MP36.CDS.3898	MP37.CDS.3915	MP38.CDS.3934	MP1.CDS.3947	MP2.CDS.2931	mp39.CDS.3903
cluster48	I	Fatty acid desaturase occurring in virulence cluster	MP_ATCC.CDS.3405	MP36.CDS.876;MP36.CDS.877	MP37.CDS.938;MP37.CDS.939	MP38.CDS.941;MP38.CDS.942	MP1.CDS.944;MP1.CDS.945	MP2.CDS.946;MP2.CDS.947	mp39.CDS.881;mp39.CDS.882
cluster2224	I	Fatty-acid-CoA ligase FadD7	MP_ATCC.CDS.2532	MP36.CDS.114	MP37.CDS.171	MP38.CDS.171	MP1.CDS.179	MP2.CDS.178	mp39.CDS.113
cluster2120	O	Fe-S oxidoreductase	MP_ATCC.CDS.2389	MP36.CDS.349	MP37.CDS.404	MP38.CDS.406	MP1.CDS.413	MP2.CDS.410	mp39.CDS.348
cluster1595	C	Ferredoxin	MP_ATCC.CDS.1792	MP36.CDS.3843	MP37.CDS.3860	MP38.CDS.3879	MP1.CDS.3890	MP2.CDS.2990	mp39.CDS.3845
cluster952	C	Ferredoxin	MP_ATCC.CDS.1031	MP36.CDS.814	MP37.CDS.877	MP38.CDS.880	MP1.CDS.883	MP2.CDS.883	mp39.CDS.821
cluster3022	C	Ferredoxin / Ferredoxin--NADP(+) reductase, actinobacterial (eukaryote-like) type (EC 1.18.1.2)	MP_ATCC.CDS.3475	MP36.CDS.946	MP37.CDS.1011	MP38.CDS.1011	MP1.CDS.1017	MP2.CDS.1018	mp39.CDS.951
cluster3464	C	Ferredoxin reductase	MP_ATCC.CDS.3974	MP36.CDS.2037	MP37.CDS.2072	MP38.CDS.2155	MP1.CDS.2102	MP2.CDS.2100	mp39.CDS.2033
cluster875	C	Ferredoxin reductase	MP_ATCC.CDS.944	MP36.CDS.733	MP37.CDS.793	MP38.CDS.790	MP1.CDS.800	MP2.CDS.799	mp39.CDS.737
cluster2676	C	Ferredoxin--NADP(+) reductase, actinobacterial (eukaryote-like) type (EC 1.18.1.2)	MP_ATCC.CDS.3072	MP36.CDS.3403	MP37.CDS.3432	MP38.CDS.3461	MP1.CDS.3454	MP2.CDS.3425	mp39.CDS.3425
cluster472	C	Ferredoxin--sulfite reductase, actinobacterial type (EC 1.8.7.1)	MP_ATCC.CDS.477	MP36.CDS.2614	MP37.CDS.2646	MP38.CDS.2721	MP1.CDS.2675	MP2.CDS.2670	mp39.CDS.2638
cluster244	P	Ferritin	MP_ATCC.CDS.207	MP36.CDS.4198	MP37.CDS.4209	MP38.CDS.4229	MP1.CDS.4239	MP2.CDS.4250	mp39.CDS.4175
cluster2034	S	Ferrochelatase, protoheme ferro-lyase (EC 4.99.1.1)	MP_ATCC.CDS.2286	MP36.CDS.1617	MP37.CDS.1663	MP38.CDS.1740	MP1.CDS.1684	MP2.CDS.1675	mp39.CDS.1627
cluster668	T	FF domain protein	MP_ATCC.CDS.713	MP36.CDS.3038	MP37.CDS.3068	MP38.CDS.3092	MP1.CDS.3096	MP2.CDS.3789	mp39.CDS.3054
cluster1348	T	FHA-domain-containing proteins	MP_ATCC.CDS.1514	MP36.CDS.2	MP37.CDS.59	MP38.CDS.58	MP1.CDS.68	MP2.CDS.68	mp39.CDS.2
cluster3425	T	FHA-domain-containing proteins	MP_ATCC.CDS.3931	MP36.CDS.1991	MP37.CDS.2028	MP38.CDS.2113	MP1.CDS.2057	MP2.CDS.2055	mp39.CDS.1991
cluster1564	C	FIG000325: clustered with transcription termination protein NusA	MP_ATCC.CDS.1755	MP36.CDS.3113	MP37.CDS.3143	MP38.CDS.3170	MP1.CDS.3171	MP2.CDS.3714	mp39.CDS.3128
cluster2429	C	FIG000506: Predicted P-loop-containing kinase	MP_ATCC.CDS.2792	MP36.CDS.1542	MP37.CDS.1601	MP38.CDS.1671	MP1.CDS.1612	MP2.CDS.1604	mp39.CDS.1552
cluster1065	S	FIG000557: hypothetical protein co-occurring with RecR	MP_ATCC.CDS.1156	MP36.CDS.4065	MP37.CDS.4077	MP38.CDS.4097	MP1.CDS.4108	MP2.CDS.4118	mp39.CDS.4067
cluster2412	S	FIG000557: hypothetical protein co-occurring with RecR	MP_ATCC.CDS.2774	MP36.CDS.1559	MP37.CDS.1618	MP38.CDS.1688	MP1.CDS.1630	MP2.CDS.1622	mp39.CDS.1570
cluster2693	S	FIG000859: hypothetical protein YebC	MP_ATCC.CDS.3094	MP36.CDS.2849	MP37.CDS.2883	MP38.CDS.1157	MP1.CDS.2913	MP2.CDS.3980	mp39.CDS.2876
cluster1655	C	FIG000875: Thioredoxin domain-containing protein EC-YbbN	MP_ATCC.CDS.1858	MP36.CDS.1439	MP37.CDS.1500	MP38.CDS.1559	MP1.CDS.1510	MP2.CDS.1502	mp39.CDS.1449
cluster3058	C	FIG001353: Acetyltransferase	MP_ATCC.CDS.3515	MP36.CDS.987	MP37.CDS.1051	MP38.CDS.1051	MP1.CDS.1057	MP2.CDS.1057	mp39.CDS.992
cluster3557	S	FIG001571: Hypothetical protein	MP_ATCC.CDS.4077	MP36.CDS.465	MP37.CDS.523	MP38.CDS.521	MP1.CDS.528	MP2.CDS.525	mp39.CDS.466
cluster2427	S	FIG001886: Cytoplasmic hypothetical protein	MP_ATCC.CDS.2790	MP36.CDS.1544	MP37.CDS.1603	MP38.CDS.1673	MP1.CDS.1614	MP2.CDS.1606	mp39.CDS.1554
cluster755	S	FIG001943: hypothetical protein YajQ	MP_ATCC.CDS.810	MP36.CDS.598	MP37.CDS.657	MP38.CDS.655	MP1.CDS.663	MP2.CDS.660	mp39.CDS.601
cluster1899	E	FIG002473: Protein YcaR in KDO2-Lipid A biosynthesis cluster	MP_ATCC.CDS.2136	MP36.CDS.1822	MP37.CDS.1859	MP38.CDS.1940	MP1.CDS.1884	MP2.CDS.1861	mp39.CDS.1823
cluster2428	E	FIG002813: LPPG:FO 2-phospho-L-lactate transferase like, CofD-like	MP_ATCC.CDS.2791	MP36.CDS.1543	MP37.CDS.1602	MP38.CDS.1672	MP1.CDS.1613	MP2.CDS.1605	mp39.CDS.1553
cluster2737	S	FIG004453: protein YceG like	MP_ATCC.CDS.3146	MP36.CDS.2797	MP37.CDS.2831	MP38.CDS.2909	MP1.CDS.2861	MP2.CDS.2854	mp39.CDS.2827
cluster2500	R	FIG004853: possible toxin to DivIC	MP_ATCC.CDS.2874	MP36.CDS.1098	MP37.CDS.1164	MP38.CDS.1221	MP1.CDS.1172	MP2.CDS.1170	mp39.CDS.1110
cluster3559	S	FIG005069: Hypothetical protein	MP_ATCC.CDS.4079	MP36.CDS.463	MP37.CDS.521	MP38.CDS.519	MP1.CDS.526	MP2.CDS.523	mp39.CDS.464
cluster2829	K	FIG005453: Putative DeoR-family transcriptional regulator	MP_ATCC.CDS.3249	MP36.CDS.2293	MP37.CDS.2324	MP38.CDS.2403	MP1.CDS.2355	MP2.CDS.2352	mp39.CDS.2289
cluster4520	S	FIG00545626: hypothetical protein		MP36.CDS.526
cluster2833	K	FIG005666: putative helicase	MP_ATCC.CDS.3253	MP36.CDS.2289	MP37.CDS.2318	MP38.CDS.2399	MP1.CDS.2351	MP2.CDS.2348	mp39.CDS.2285
cluster1912	K	FIG005773: conserved membrane protein ML1361	MP_ATCC.CDS.2150	MP36.CDS.1836	MP37.CDS.1873	MP38.CDS.1954	MP1.CDS.1898	MP2.CDS.1875	mp39.CDS.1837
cluster1376	S	FIG00659286: hypothetical protein	MP_ATCC.CDS.1544	MP36.CDS.33	MP37.CDS.90	MP38.CDS.89	MP1.CDS.99	MP2.CDS.99	mp39.CDS.33
cluster369	K	FIG006762: Phosphoglycerate mutase family	MP_ATCC.CDS.358	MP36.CDS.2433	MP37.CDS.2463	MP38.CDS.2543	MP1.CDS.2497	MP2.CDS.2493	mp39.CDS.2458
cluster1913	S	FIG007481: hypothetical protein	MP_ATCC.CDS.2151	MP36.CDS.1837	MP37.CDS.1874	MP38.CDS.1955	MP1.CDS.1899	MP2.CDS.1876	mp39.CDS.1838
cluster674	R	FIG007959: peptidase, M16 family	MP_ATCC.CDS.719	MP36.CDS.3044	MP37.CDS.3074	MP38.CDS.3098	MP1.CDS.3102	MP2.CDS.3783	mp39.CDS.3060
cluster2287	S	FIG00819976: hypothetical protein	MP_ATCC.CDS.2604	MP36.CDS.189	MP37.CDS.243	MP38.CDS.243	MP1.CDS.251	MP2.CDS.250	mp39.CDS.185
cluster1690	S	FIG00819977: hypothetical protein	MP_ATCC.CDS.1904	MP36.CDS.3524	MP37.CDS.3554	MP38.CDS.3578	MP1.CDS.3576	MP2.CDS.3305	mp39.CDS.3543
cluster3915	S	FIG00819989: hypothetical protein			MP37.CDS.1988	MP38.CDS.2072	MP1.CDS.2015	MP2.CDS.1998	mp39.CDS.1949
cluster357	S	FIG00819990: hypothetical protein	MP_ATCC.CDS.344	MP36.CDS.2447	MP37.CDS.2477	MP38.CDS.2557	MP1.CDS.2511	MP2.CDS.2507	mp39.CDS.2472
cluster194	M	FIG00819990: Possible membrane protein	MP_ATCC.CDS.149	MP36.CDS.3946	MP37.CDS.3963	MP38.CDS.3982	MP1.CDS.3990	MP2.CDS.4002	mp39.CDS.3951
cluster3403	S	FIG00819992: hypothetical protein	MP_ATCC.CDS.3908	MP36.CDS.1967	MP37.CDS.2004	MP38.CDS.2089	MP1.CDS.2033	MP2.CDS.2014	mp39.CDS.1966
cluster3408	S	FIG00819992: hypothetical protein	MP_ATCC.CDS.3914	MP36.CDS.1972	MP37.CDS.2009	MP38.CDS.2094	MP1.CDS.2039	MP2.CDS.2020	mp39.CDS.1972
cluster1215	S	FIG00820003: hypothetical protein	MP_ATCC.CDS.1334	MP36.CDS.1148	MP37.CDS.1212	MP38.CDS.1268	MP1.CDS.1219	MP2.CDS.1217	mp39.CDS.1158
cluster1357	S	FIG00820005: hypothetical protein	MP_ATCC.CDS.1523	MP36.CDS.12	MP37.CDS.68	MP38.CDS.68	MP1.CDS.78	MP2.CDS.77	mp39.CDS.11
cluster1908	S	FIG00820006: hypothetical protein	MP_ATCC.CDS.2146	MP36.CDS.1832	MP37.CDS.1869	MP38.CDS.1950	MP1.CDS.1894	MP2.CDS.1871	mp39.CDS.1833
cluster945	S	FIG00820010: hypothetical protein	MP_ATCC.CDS.1024	MP36.CDS.807	MP37.CDS.870	MP38.CDS.873	MP1.CDS.876	MP2.CDS.876	mp39.CDS.814
cluster3645	S	FIG00820011: hypothetical protein	MP_ATCC.CDS.4179	MP36.CDS.3863	MP37.CDS.3880	MP38.CDS.3899	MP1.CDS.3912	MP2.CDS.2966	mp39.CDS.3868
cluster1447	S	FIG00820014: hypothetical protein	MP_ATCC.CDS.1627	MP36.CDS.2706	MP37.CDS.2737	MP38.CDS.2814	MP1.CDS.2765	MP2.CDS.2761	mp39.CDS.2732
cluster629	S	FIG00820016: hypothetical protein	MP_ATCC.CDS.656	MP36.CDS.2982	MP37.CDS.3013	MP38.CDS.3036	MP1.CDS.3039	MP2.CDS.3846	mp39.CDS.3006
cluster1321	S	FIG00820024: hypothetical protein	MP_ATCC.CDS.1474	MP36.CDS.4275	MP37.CDS.20	MP38.CDS.20	MP1.CDS.29	MP2.CDS.29	mp39.CDS.4241
cluster4236	A	Methionyl-tRNA synthetase (EC 6.1.1.10)	MP_ATCC.CDS.2894
cluster70	S	FIG00820026: hypothetical protein	MP_ATCC.CDS.3	MP36.CDS.1714	MP37.CDS.1757	MP38.CDS.1835	MP1.CDS.1779	MP2.CDS.1755	mp39.CDS.1716
cluster345	S	FIG00820044: hypothetical protein	MP_ATCC.CDS.330	MP36.CDS.2461	MP37.CDS.2492	MP38.CDS.2571	MP1.CDS.2525	MP2.CDS.2521	mp39.CDS.2486
cluster1322	S	FIG00820046: hypothetical protein	MP_ATCC.CDS.1475	MP36.CDS.4276	MP37.CDS.21	MP38.CDS.21	MP1.CDS.30	MP2.CDS.30	mp39.CDS.4242
cluster334	S	FIG00820050: hypothetical protein	MP_ATCC.CDS.318	MP36.CDS.2473	MP37.CDS.2504	MP38.CDS.2583	MP1.CDS.2537	MP2.CDS.2533	mp39.CDS.2498
cluster2472	S	FIG00820054: hypothetical protein	MP_ATCC.CDS.2839	MP36.CDS.1495	MP37.CDS.1554	MP38.CDS.1624	MP1.CDS.1565	MP2.CDS.1557	mp39.CDS.1504
cluster1604	S	FIG00820055: hypothetical protein	MP_ATCC.CDS.1802	MP36.CDS.3832	MP37.CDS.3849	MP38.CDS.3869	MP1.CDS.3880	MP2.CDS.3000	mp39.CDS.3834
cluster2780	S	FIG00820058: hypothetical protein	MP_ATCC.CDS.3192	MP36.CDS.2130	MP37.CDS.2163	MP38.CDS.2245	MP1.CDS.2193	MP2.CDS.2193	mp39.CDS.2124
cluster1409	S	FIG00820063: hypothetical protein	MP_ATCC.CDS.1581	MP36.CDS.2661	MP37.CDS.2692	MP38.CDS.2769	MP1.CDS.2721	MP2.CDS.2716	mp39.CDS.2686
cluster2403	S	FIG00820067: hypothetical protein	MP_ATCC.CDS.2745	MP36.CDS.1918	MP37.CDS.1954	MP38.CDS.2035	MP1.CDS.1980	MP2.CDS.1961	mp39.CDS.1919
cluster3085	S	FIG00820067: hypothetical protein	MP_ATCC.CDS.3542	MP36.CDS.1014	MP37.CDS.1078	MP38.CDS.1078	MP1.CDS.1084	MP2.CDS.1084	mp39.CDS.1020
cluster3365	S	FIG00820079: hypothetical protein	MP_ATCC.CDS.3865	MP36.CDS.3300	MP37.CDS.3331	MP38.CDS.3358	MP1.CDS.3352	MP2.CDS.3528	mp39.CDS.3320
cluster3466	S	FIG00820081: hypothetical protein	MP_ATCC.CDS.3976	MP36.CDS.2039	MP37.CDS.2074	MP38.CDS.2157	MP1.CDS.2104	MP2.CDS.2102	mp39.CDS.2035
cluster627	S	FIG00820085: hypothetical protein	MP_ATCC.CDS.654	MP36.CDS.2980	MP37.CDS.3011	MP38.CDS.3034	MP1.CDS.3036	MP2.CDS.3848	mp39.CDS.3004
cluster3275	S	FIG00820088: hypothetical protein	MP_ATCC.CDS.3754	MP36.CDS.3705	MP37.CDS.3735	MP38.CDS.3757	MP1.CDS.3755	MP2.CDS.3124	mp39.CDS.3724
cluster265	S	FIG00820089: hypothetical protein	MP_ATCC.CDS.235	MP36.CDS.1125	MP37.CDS.1189	MP38.CDS.1245	MP1.CDS.1197	MP2.CDS.1195	mp39.CDS.1134
cluster1868	S	FIG00820092: hypothetical protein	MP_ATCC.CDS.2097	MP36.CDS.1779	MP37.CDS.1820	MP38.CDS.1901	MP1.CDS.1843	MP2.CDS.1821	mp39.CDS.1779
cluster2964	S	FIG00820092: hypothetical protein	MP_ATCC.CDS.3407	MP36.CDS.879	MP37.CDS.941	MP38.CDS.944	MP1.CDS.947	MP2.CDS.949	mp39.CDS.884
cluster2246	S	FIG00820093: hypothetical protein	MP_ATCC.CDS.2557	MP36.CDS.140	MP37.CDS.196	MP38.CDS.196	MP1.CDS.204	MP2.CDS.203	mp39.CDS.137
cluster2288	S	FIG00820103: hypothetical protein	MP_ATCC.CDS.2605	MP36.CDS.190	MP37.CDS.244	MP38.CDS.244	MP1.CDS.252	MP2.CDS.251	mp39.CDS.186
cluster2603	S	FIG00820106: hypothetical protein	MP_ATCC.CDS.2991	MP36.CDS.3322	MP37.CDS.3354	MP38.CDS.3381	MP1.CDS.3375	MP2.CDS.3505	mp39.CDS.3343
cluster2605	S	FIG00820111: hypothetical protein	MP_ATCC.CDS.2993	MP36.CDS.3324	MP37.CDS.3356	MP38.CDS.3383	MP1.CDS.3377	MP2.CDS.3503	mp39.CDS.3345
cluster1606	S	FIG00820113: hypothetical protein	MP_ATCC.CDS.1804	MP36.CDS.3830	MP37.CDS.3847	MP38.CDS.3867	MP1.CDS.3878	MP2.CDS.3002	mp39.CDS.3832
cluster263	S	FIG00820116: hypothetical protein	MP_ATCC.CDS.233	MP36.CDS.1127	MP37.CDS.1191	MP38.CDS.1247	MP1.CDS.1199	MP2.CDS.1197	mp39.CDS.1136
cluster1294	S	FIG00820117: hypothetical protein	MP_ATCC.CDS.1430	MP36.CDS.1247	MP37.CDS.1308	MP38.CDS.1364	MP1.CDS.1315	MP2.CDS.1313	mp39.CDS.1254
cluster2903	S	FIG00820119: hypothetical protein	MP_ATCC.CDS.3339	MP36.CDS.2172	MP37.CDS.2203	MP38.CDS.2285	MP1.CDS.2235	MP2.CDS.2234	mp39.CDS.2164
cluster1853	S	FIG00820125: hypothetical protein	MP_ATCC.CDS.2080	MP36.CDS.1762	MP37.CDS.1804	MP38.CDS.1884	MP1.CDS.1826	MP2.CDS.1804	mp39.CDS.1763
cluster1861	S	FIG00820127: hypothetical protein	MP_ATCC.CDS.2090	MP36.CDS.1772	MP37.CDS.1813	MP38.CDS.1894	MP1.CDS.1836	MP2.CDS.1814	mp39.CDS.1772
cluster1114	S	FIG00820132: hypothetical protein	MP_ATCC.CDS.1212	MP36.CDS.4122	MP37.CDS.4133	MP38.CDS.4154	MP1.CDS.4165	MP2.CDS.4175	mp39.CDS.2310
cluster3993	S	FIG00820137: hypothetical protein		MP36.CDS.1901		MP38.CDS.2019	MP1.CDS.1963
cluster565	S	FIG00820138: hypothetical protein	MP_ATCC.CDS.586	MP36.CDS.3419	MP37.CDS.3448	MP38.CDS.3476	MP1.CDS.3470	MP2.CDS.3409	mp39.CDS.3442
cluster3875	S	FIG00820143: hypothetical protein		MP36.CDS.3603	MP37.CDS.3633	MP38.CDS.3655	MP1.CDS.3653	MP2.CDS.3226	mp39.CDS.3621
cluster4270	I	Lipoprotein LppB	MP_ATCC.CDS.3156
cluster95	S	FIG00820144: hypothetical protein	MP_ATCC.CDS.30	MP36.CDS.1688	MP37.CDS.1731	MP38.CDS.1809	MP1.CDS.1753	MP2.CDS.1729	mp39.CDS.1690
cluster1715	S	FIG00820146: hypothetical protein	MP_ATCC.CDS.1930	MP36.CDS.3551	MP37.CDS.3582	MP38.CDS.3604	MP1.CDS.3602	MP2.CDS.3278	mp39.CDS.3570
cluster846	S	FIG00820147: hypothetical protein	MP_ATCC.CDS.910	MP36.CDS.699	MP37.CDS.759	MP38.CDS.756	MP1.CDS.765	MP2.CDS.764	mp39.CDS.702
cluster547	S	FIG00820149: hypothetical protein	MP_ATCC.CDS.563	MP36.CDS.3446	MP37.CDS.3474	MP38.CDS.3501	MP1.CDS.3496	MP2.CDS.3385	mp39.CDS.3466
cluster3382	S	FIG00820161: hypothetical protein	MP_ATCC.CDS.3885	MP36.CDS.3282	MP37.CDS.3310	MP38.CDS.3339	MP1.CDS.3334	MP2.CDS.3547	mp39.CDS.3301
cluster295	S	FIG00820166: hypothetical protein	MP_ATCC.CDS.273	MP36.CDS.2520	MP37.CDS.2551	MP38.CDS.2626	MP1.CDS.2580	MP2.CDS.2576	mp39.CDS.2542
cluster3533	S	FIG00820166: hypothetical protein	MP_ATCC.CDS.4049	MP36.CDS.493	MP37.CDS.553	MP38.CDS.549	MP1.CDS.556	MP2.CDS.553	mp39.CDS.494
cluster1959	S	FIG00820182: hypothetical protein	MP_ATCC.CDS.2200	MP36.CDS.1888	MP37.CDS.1925	MP38.CDS.2006	MP1.CDS.1950	MP2.CDS.1929	mp39.CDS.1889
cluster517	S	FIG00820194: hypothetical protein	MP_ATCC.CDS.528	MP36.CDS.1937	MP37.CDS.1972	MP38.CDS.2056	MP1.CDS.1998	MP2.CDS.1981	mp39.CDS.1933
cluster518	S	FIG00820194: hypothetical protein	MP_ATCC.CDS.529	MP36.CDS.1936	MP37.CDS.1971	MP38.CDS.2055	MP1.CDS.1997	MP2.CDS.1980	mp39.CDS.1932
cluster3825	S	FIG00820198: hypothetical protein	MP_ATCC.CDS.2763	MP36.CDS.1569		MP38.CDS.1698	MP1.CDS.1640	MP2.CDS.1649	mp39.CDS.1580
cluster1660	S	FIG00820201: hypothetical protein	MP_ATCC.CDS.1868	MP36.CDS.2208	MP37.CDS.2240	MP38.CDS.2322	MP1.CDS.2271	MP2.CDS.2270	mp39.CDS.2206
cluster711	S	FIG00820204: hypothetical protein	MP_ATCC.CDS.762	MP36.CDS.551	MP37.CDS.610	MP38.CDS.607	MP1.CDS.615	MP2.CDS.612	mp39.CDS.552
cluster3248	S	FIG00820207: hypothetical protein	MP_ATCC.CDS.3722	MP36.CDS.1304	MP37.CDS.1365	MP38.CDS.1424	MP1.CDS.1373	MP2.CDS.1369	mp39.CDS.1311
cluster805	S	FIG00820212: hypothetical protein	MP_ATCC.CDS.866	MP36.CDS.655	MP37.CDS.714	MP38.CDS.712	MP1.CDS.721	MP2.CDS.720	mp39.CDS.658
cluster1750	S	FIG00820217: hypothetical protein	MP_ATCC.CDS.1968	MP36.CDS.3590	MP37.CDS.3620	MP38.CDS.3642	MP1.CDS.3640	MP2.CDS.3239	mp39.CDS.3608
cluster3552	S	FIG00820218: hypothetical protein	MP_ATCC.CDS.4070	MP36.CDS.472	MP37.CDS.530	MP38.CDS.528	MP1.CDS.535	MP2.CDS.532	mp39.CDS.473
cluster3649	S	FIG00820224: hypothetical protein	MP_ATCC.CDS.4183	MP36.CDS.1254	MP37.CDS.1314	MP38.CDS.1370	MP1.CDS.1321	MP2.CDS.1319	mp39.CDS.1260
cluster239	S	FIG00820230: hypothetical protein	MP_ATCC.CDS.201	MP36.CDS.2563	MP37.CDS.2595	MP38.CDS.2669	MP1.CDS.2624	MP2.CDS.2619	mp39.CDS.2585
cluster3283	S	FIG00820233: hypothetical protein	MP_ATCC.CDS.3763	MP36.CDS.3696	MP37.CDS.3726	MP38.CDS.3748	MP1.CDS.3746	MP2.CDS.3133	mp39.CDS.3715
cluster3919	S	FIG00820235: hypothetical protein	MP_ATCC.CDS.54		MP37.CDS.1706	MP38.CDS.1784			mp39.CDS.1663
cluster2776	S	FIG00820249: hypothetical protein	MP_ATCC.CDS.3187	MP36.CDS.2756	MP37.CDS.2790	MP38.CDS.2867	MP1.CDS.2818	MP2.CDS.2812	mp39.CDS.2786
cluster3947	S	FIG00820250: hypothetical protein		MP36.CDS.2886		MP38.CDS.2939		MP2.CDS.3942	mp39.CDS.2911
cluster702	S	FIG00820260: hypothetical protein	MP_ATCC.CDS.752	MP36.CDS.3078	MP37.CDS.3108	MP38.CDS.3132	MP1.CDS.3136	MP2.CDS.3749	mp39.CDS.3094
cluster965	S	FIG00820278: hypothetical protein	MP_ATCC.CDS.1045	MP36.CDS.828	MP37.CDS.891	MP38.CDS.894	MP1.CDS.897	MP2.CDS.897	mp39.CDS.835
cluster3161	S	FIG00820284: hypothetical protein	MP_ATCC.CDS.3628	MP36.CDS.1398	MP37.CDS.1461	MP38.CDS.1520	MP1.CDS.1469	MP2.CDS.1464	mp39.CDS.1408
cluster3987	S	FIG00820284: hypothetical protein		MP36.CDS.1397			MP1.CDS.1468	MP2.CDS.1463
cluster2086	S	FIG00820302: hypothetical protein	MP_ATCC.CDS.2350	MP36.CDS.327	MP37.CDS.382	MP38.CDS.383	MP1.CDS.390	MP2.CDS.388	mp39.CDS.326
cluster2375	S	FIG00820304: hypothetical protein	MP_ATCC.CDS.2702	MP36.CDS.287	MP37.CDS.339	MP38.CDS.342	MP1.CDS.349	MP2.CDS.347	mp39.CDS.284
cluster1053	S	FIG00820305: hypothetical protein	MP_ATCC.CDS.1143	MP36.CDS.4052	MP37.CDS.4064	MP38.CDS.4084	MP1.CDS.4095	MP2.CDS.4105	mp39.CDS.4054
cluster5391	S	FIG00820306: hypothetical protein						MP2.CDS.3944
cluster3511	S	FIG00820307: hypothetical protein	MP_ATCC.CDS.4025	MP36.CDS.2090	MP37.CDS.2126	MP38.CDS.2207	MP1.CDS.2154	MP2.CDS.2154	mp39.CDS.2086
cluster3320	S	FIG00820308: hypothetical protein	MP_ATCC.CDS.3805	MP36.CDS.2751	MP37.CDS.2785	MP38.CDS.2862	MP1.CDS.2813	MP2.CDS.2807	mp39.CDS.2781
cluster1209	S	FIG00820309: hypothetical protein	MP_ATCC.CDS.1328	MP36.CDS.1142	MP37.CDS.1206	MP38.CDS.1262	MP1.CDS.1213	MP2.CDS.1211	mp39.CDS.1152
cluster1885	S	FIG00820311: hypothetical protein	MP_ATCC.CDS.2121	MP36.CDS.1806	MP37.CDS.1843	MP38.CDS.1924	MP1.CDS.1868	MP2.CDS.1845	mp39.CDS.1807
cluster356	S	FIG00820323: hypothetical protein	MP_ATCC.CDS.343	MP36.CDS.2448	MP37.CDS.2478	MP38.CDS.2558	MP1.CDS.2512	MP2.CDS.2508	mp39.CDS.2473
cluster2872	S	FIG00820327: hypothetical protein	MP_ATCC.CDS.3298	MP36.CDS.2242	MP37.CDS.2272	MP38.CDS.2356	MP1.CDS.2306	MP2.CDS.2303	mp39.CDS.2241
cluster3684	S	FIG00820332: hypothetical protein	MP_ATCC.CDS.4223	MP36.CDS.1295	MP37.CDS.1355	MP38.CDS.1412	MP1.CDS.1363	MP2.CDS.1360	mp39.CDS.1303
cluster2094	S	FIG00820335: hypothetical protein	MP_ATCC.CDS.2358	MP36.CDS.319	MP37.CDS.374	MP38.CDS.375	MP1.CDS.382	MP2.CDS.380	mp39.CDS.318
cluster2373	S	FIG00820338: hypothetical protein	MP_ATCC.CDS.2700	MP36.CDS.285	MP37.CDS.337	MP38.CDS.340	MP1.CDS.347	MP2.CDS.345	mp39.CDS.282
cluster731	S	FIG00820339: hypothetical protein	MP_ATCC.CDS.785	MP36.CDS.574	MP37.CDS.632	MP38.CDS.630	MP1.CDS.639	MP2.CDS.636	mp39.CDS.576
cluster2650	S	FIG00820344: hypothetical protein	MP_ATCC.CDS.3043	MP36.CDS.3374	MP37.CDS.3405	MP38.CDS.3434	MP1.CDS.3427	MP2.CDS.3453	mp39.CDS.3397
cluster3465	S	FIG00820353: hypothetical protein	MP_ATCC.CDS.3975	MP36.CDS.2038	MP37.CDS.2073	MP38.CDS.2156	MP1.CDS.2103	MP2.CDS.2101	mp39.CDS.2034
cluster1493	S	FIG00820356: hypothetical protein	MP_ATCC.CDS.1678	MP36.CDS.3193	MP37.CDS.3221	MP38.CDS.3249	MP1.CDS.3250	MP2.CDS.3634	mp39.CDS.3206
cluster980	S	FIG00820357: hypothetical protein	MP_ATCC.CDS.1060	MP36.CDS.843	MP37.CDS.906	MP38.CDS.909	MP1.CDS.912	MP2.CDS.913	mp39.CDS.850
cluster3019	S	FIG00820359: hypothetical protein	MP_ATCC.CDS.3472	MP36.CDS.943	MP37.CDS.1008	MP38.CDS.1008	MP1.CDS.1014	MP2.CDS.1015	mp39.CDS.948
cluster1562	S	FIG00820361: hypothetical protein	MP_ATCC.CDS.1753	MP36.CDS.3116	MP37.CDS.3146	MP38.CDS.3173	MP1.CDS.3174	MP2.CDS.3711	mp39.CDS.3131
cluster3183	S	FIG00820366: hypothetical protein	MP_ATCC.CDS.3652	MP36.CDS.1374	MP37.CDS.1438	MP38.CDS.1497	MP1.CDS.1445	MP2.CDS.1440	mp39.CDS.1385
cluster771	S	FIG00820371: hypothetical protein	MP_ATCC.CDS.827	MP36.CDS.615	MP37.CDS.675	MP38.CDS.673	MP1.CDS.681	MP2.CDS.679	mp39.CDS.619
cluster787	S	FIG00820380: hypothetical protein	MP_ATCC.CDS.846	MP36.CDS.635	MP37.CDS.694	MP38.CDS.692	MP1.CDS.701	MP2.CDS.699	mp39.CDS.638
cluster2426	S	FIG00820381: hypothetical protein	MP_ATCC.CDS.2789	MP36.CDS.1545	MP37.CDS.1604	MP38.CDS.1674	MP1.CDS.1615	MP2.CDS.1607	mp39.CDS.1555
cluster318	S	FIG00820384: hypothetical protein	MP_ATCC.CDS.299	MP36.CDS.2494	MP37.CDS.2524	MP38.CDS.2601	MP1.CDS.2556	MP2.CDS.2552	mp39.CDS.2518
cluster489	S	FIG00820394: hypothetical protein	MP_ATCC.CDS.495	MP36.CDS.2596	MP37.CDS.2628	MP38.CDS.2703	MP1.CDS.2657	MP2.CDS.2652	mp39.CDS.2620
cluster428	S	FIG00820397: hypothetical protein	MP_ATCC.CDS.425	MP36.CDS.3857	MP37.CDS.3874	MP38.CDS.3893	MP1.CDS.3906	MP2.CDS.2972	mp39.CDS.3862
cluster3747	S	FIG00820398: hypothetical protein	MP_ATCC.CDS.4293	MP36.CDS.3810	MP37.CDS.3828	MP38.CDS.1605	MP1.CDS.3859	MP2.CDS.3021	mp39.CDS.3814
cluster1942	S	FIG00820406: hypothetical protein	MP_ATCC.CDS.2183	MP36.CDS.1871	MP37.CDS.1907	MP38.CDS.1989	MP1.CDS.1933	MP2.CDS.1911	mp39.CDS.1872
cluster1963	S	FIG00820409: hypothetical protein	MP_ATCC.CDS.2204	MP36.CDS.1892	MP37.CDS.1929	MP38.CDS.2010	MP1.CDS.1954	MP2.CDS.1933	mp39.CDS.1893
cluster1067	S	FIG00820410: hypothetical protein	MP_ATCC.CDS.1158	MP36.CDS.4067	MP37.CDS.4079	MP38.CDS.4099	MP1.CDS.4110	MP2.CDS.4120	mp39.CDS.4069
cluster3850	S	FIG00820414: hypothetical protein	MP_ATCC.CDS.3670	MP36.CDS.1357	MP37.CDS.1417	MP38.CDS.1478	MP1.CDS.1428		mp39.CDS.1364
cluster1418	S	FIG00820419: hypothetical protein	MP_ATCC.CDS.1594	MP36.CDS.2673	MP37.CDS.2704	MP38.CDS.2781	MP1.CDS.2733	MP2.CDS.2728	mp39.CDS.2698
cluster3185	S	FIG00820425: hypothetical protein	MP_ATCC.CDS.3656	MP36.CDS.1370	MP37.CDS.1431	MP38.CDS.1492	MP1.CDS.1441	MP2.CDS.1436	mp39.CDS.1377
cluster3162	S	FIG00820436: hypothetical protein	MP_ATCC.CDS.3629	MP36.CDS.1396	MP37.CDS.1460	MP38.CDS.1519	MP1.CDS.1467	MP2.CDS.1462	mp39.CDS.1407
cluster2182	S	FIG00820447: hypothetical protein	MP_ATCC.CDS.2476	MP36.CDS.2878	MP37.CDS.2911	MP38.CDS.2931	MP1.CDS.2939	MP2.CDS.3952	mp39.CDS.2903
cluster3562	S	FIG00820451: hypothetical protein	MP_ATCC.CDS.4082	MP36.CDS.460	MP37.CDS.518	MP38.CDS.516	MP1.CDS.523	MP2.CDS.520	mp39.CDS.461
cluster3103	S	FIG00820456: hypothetical protein	MP_ATCC.CDS.3564	MP36.CDS.1037	MP37.CDS.1099	MP38.CDS.1099	MP1.CDS.1107	MP2.CDS.1107	mp39.CDS.1044
cluster3352	S	FIG00820460: hypothetical protein	MP_ATCC.CDS.3850	MP36.CDS.3865	MP37.CDS.3882	MP38.CDS.3901	MP1.CDS.3914	MP2.CDS.2964	mp39.CDS.3870
cluster3413	S	FIG00820470: hypothetical protein	MP_ATCC.CDS.3919	MP36.CDS.1977	MP37.CDS.2014	MP38.CDS.2099	MP1.CDS.2044	MP2.CDS.2025	mp39.CDS.1977
cluster413	S	FIG00820472: hypothetical protein	MP_ATCC.CDS.404	MP36.CDS.2386	MP37.CDS.2417	MP38.CDS.2496	MP1.CDS.2450	MP2.CDS.2447	mp39.CDS.2410
cluster976	S	FIG00820473: hypothetical protein	MP_ATCC.CDS.1056	MP36.CDS.839	MP37.CDS.902	MP38.CDS.905	MP1.CDS.908	MP2.CDS.909	mp39.CDS.846
cluster3641	S	FIG00820475: hypothetical protein	MP_ATCC.CDS.4174	MP36.CDS.370	MP37.CDS.426	MP38.CDS.427	MP1.CDS.434	MP2.CDS.431	mp39.CDS.370
cluster1205	S	FIG00820480: hypothetical protein	MP_ATCC.CDS.1323	MP36.CDS.1137	MP37.CDS.1201	MP38.CDS.1257	MP1.CDS.1208	MP2.CDS.1206	mp39.CDS.1147
cluster302	S	FIG00820486: hypothetical protein	MP_ATCC.CDS.282	MP36.CDS.2511	MP37.CDS.2541	MP38.CDS.2617	MP1.CDS.2572	MP2.CDS.2568	mp39.CDS.2534
cluster1093	S	FIG00820497: hypothetical protein	MP_ATCC.CDS.1191	MP36.CDS.4101	MP37.CDS.4112	MP38.CDS.4133	MP1.CDS.4144	MP2.CDS.4154	mp39.CDS.4103
cluster1453	S	FIG00820499: hypothetical protein	MP_ATCC.CDS.1634	MP36.CDS.2713	MP37.CDS.2744	MP38.CDS.2821	MP1.CDS.2772	MP2.CDS.2768	mp39.CDS.2740
cluster866	S	FIG00820507: hypothetical protein	MP_ATCC.CDS.935	MP36.CDS.724	MP37.CDS.784	MP38.CDS.781	MP1.CDS.791	MP2.CDS.790	mp39.CDS.728
cluster4009	S	FIG00820520: hypothetical protein			MP37.CDS.1620	MP38.CDS.1690			mp39.CDS.1572
cluster4274	S	PE-PGRS FAMILY PROTEIN	MP_ATCC.CDS.670
cluster1318	S	FIG00820525: hypothetical protein	MP_ATCC.CDS.1471	MP36.CDS.4272	MP37.CDS.17	MP38.CDS.17	MP1.CDS.26	MP2.CDS.26	mp39.CDS.4238
cluster1159	S	FIG00820527: hypothetical protein	MP_ATCC.CDS.1264	MP36.CDS.519	MP37.CDS.579	MP38.CDS.576	MP1.CDS.583	MP2.CDS.581	mp39.CDS.521
cluster1260	S	FIG00820531: hypothetical protein	MP_ATCC.CDS.1388	MP36.CDS.1205	MP37.CDS.1267	MP38.CDS.1324	MP1.CDS.1275	MP2.CDS.1272	mp39.CDS.1213
cluster951	S	FIG00820532: hypothetical protein	MP_ATCC.CDS.1030	MP36.CDS.813	MP37.CDS.876	MP38.CDS.879	MP1.CDS.882	MP2.CDS.882	mp39.CDS.820
cluster2571	S	FIG00820542: hypothetical protein	MP_ATCC.CDS.2955	MP36.CDS.3778	MP37.CDS.3797	MP38.CDS.3828	MP1.CDS.3828	MP2.CDS.3051	mp39.CDS.3785
cluster1200	S	FIG00820551: hypothetical protein	MP_ATCC.CDS.1315	MP36.CDS.1130	MP37.CDS.1194	MP38.CDS.1250	MP1.CDS.1201	MP2.CDS.1199	mp39.CDS.1139
cluster512	S	FIG00820556: hypothetical protein	MP_ATCC.CDS.522	MP36.CDS.1943	MP37.CDS.1978	MP38.CDS.2062	MP1.CDS.2004	MP2.CDS.1987	mp39.CDS.1939
cluster3360	S	FIG00820558: hypothetical protein	MP_ATCC.CDS.3860	MP36.CDS.3305	MP37.CDS.3336	MP38.CDS.3363	MP1.CDS.3357	MP2.CDS.3523	mp39.CDS.3325
cluster553	S	FIG00820561: hypothetical protein	MP_ATCC.CDS.569	MP36.CDS.3440	MP37.CDS.3468	MP38.CDS.3495	MP1.CDS.3490	MP2.CDS.3391	mp39.CDS.3460
cluster2883	S	FIG00820565: hypothetical protein	MP_ATCC.CDS.3315	MP36.CDS.859	MP37.CDS.922	MP38.CDS.925	MP1.CDS.928	MP2.CDS.930	mp39.CDS.865
cluster2518	S	FIG00820568: hypothetical protein	MP_ATCC.CDS.2895	MP36.CDS.1079	MP37.CDS.1144	MP38.CDS.1200	MP1.CDS.1152	MP2.CDS.1150	mp39.CDS.1090
cluster3129	S	FIG00820570: hypothetical protein	MP_ATCC.CDS.3593	MP36.CDS.2221	MP37.CDS.2252	MP38.CDS.2334	MP1.CDS.2283	MP2.CDS.2282	mp39.CDS.2218
cluster3375	S	FIG00820572: hypothetical protein	MP_ATCC.CDS.3878	MP36.CDS.3289	MP37.CDS.3318	MP38.CDS.3347	MP1.CDS.3341	MP2.CDS.3539	mp39.CDS.3308
cluster1167	S	FIG00820573: hypothetical protein	MP_ATCC.CDS.1272	MP36.CDS.46	MP37.CDS.103	MP38.CDS.102	MP1.CDS.112	MP2.CDS.112	mp39.CDS.46
cluster600	S	FIG00820574: hypothetical protein	MP_ATCC.CDS.624	MP36.CDS.2953	MP37.CDS.2983	MP38.CDS.3006	MP1.CDS.3009	MP2.CDS.3876	mp39.CDS.2976
cluster3045	S	FIG00820576: hypothetical protein	MP_ATCC.CDS.3501	MP36.CDS.972	MP37.CDS.1037	MP38.CDS.1037	MP1.CDS.1043	MP2.CDS.1044	mp39.CDS.977
cluster1313	S	FIG00820584: hypothetical protein	MP_ATCC.CDS.1466	MP36.CDS.4267	MP37.CDS.12	MP38.CDS.12	MP1.CDS.21	MP2.CDS.21	mp39.CDS.4232
cluster2840	S	FIG00820584: hypothetical protein	MP_ATCC.CDS.3261	MP36.CDS.2281	MP37.CDS.2310	MP38.CDS.2391	MP1.CDS.2343	MP2.CDS.2340	mp39.CDS.2276
cluster1055	S	FIG00820599: hypothetical protein	MP_ATCC.CDS.1145	MP36.CDS.4054	MP37.CDS.4066	MP38.CDS.4086	MP1.CDS.4097	MP2.CDS.4107	mp39.CDS.4056
cluster3826	S	FIG00820605: hypothetical protein	MP_ATCC.CDS.2765	MP36.CDS.1567		MP38.CDS.1696	MP1.CDS.1638	MP2.CDS.1647	mp39.CDS.1578
cluster477	S	FIG00820609: hypothetical protein	MP_ATCC.CDS.483	MP36.CDS.2608	MP37.CDS.2640	MP38.CDS.2715	MP1.CDS.2669	MP2.CDS.2664	mp39.CDS.2632
cluster232	S	FIG00820622: hypothetical protein	MP_ATCC.CDS.194	MP36.CDS.2198	MP37.CDS.2230	MP38.CDS.2312	MP1.CDS.2261	MP2.CDS.2260	mp39.CDS.2196
cluster342	S	FIG00820627: hypothetical protein	MP_ATCC.CDS.327	MP36.CDS.2464	MP37.CDS.2495	MP38.CDS.2574	MP1.CDS.2528	MP2.CDS.2524	mp39.CDS.2489
cluster606	S	FIG00820633: hypothetical protein	MP_ATCC.CDS.632	MP36.CDS.2959	MP37.CDS.2989	MP38.CDS.3012	MP1.CDS.3015	MP2.CDS.3870	mp39.CDS.2982
cluster1473	I	FIG00820637:: Acyl dehydratase	MP_ATCC.CDS.1658	MP36.CDS.2738	MP37.CDS.2771	MP38.CDS.2848	MP1.CDS.2800	MP2.CDS.2794	mp39.CDS.2767
cluster298	S	FIG00820639: hypothetical protein	MP_ATCC.CDS.277	MP36.CDS.2517	MP37.CDS.2548	MP38.CDS.2623	MP1.CDS.2577	MP2.CDS.2573	mp39.CDS.2539
cluster3338	S	FIG00820641: hypothetical protein	MP_ATCC.CDS.3828	MP36.CDS.4211	MP37.CDS.4222	MP38.CDS.4242	MP1.CDS.4252	MP2.CDS.4263	mp39.CDS.4188
cluster2370	S	FIG00820646: hypothetical protein	MP_ATCC.CDS.2696	MP36.CDS.282	MP37.CDS.334	MP38.CDS.336	MP1.CDS.343	MP2.CDS.342	mp39.CDS.278
cluster3478	S	FIG00820653: hypothetical protein	MP_ATCC.CDS.3988	MP36.CDS.2052	MP37.CDS.2088	MP38.CDS.2170	MP1.CDS.2117	MP2.CDS.2115	mp39.CDS.2047
cluster1820	S	FIG00820654: hypothetical protein	MP_ATCC.CDS.2044	MP36.CDS.1727	MP37.CDS.1769	MP38.CDS.1849	MP1.CDS.1791	MP2.CDS.1768	mp39.CDS.1729
cluster2122	S	FIG00820657: hypothetical protein	MP_ATCC.CDS.2391	MP36.CDS.351	MP37.CDS.406	MP38.CDS.408	MP1.CDS.415	MP2.CDS.412	mp39.CDS.350
cluster1725	S	FIG00820662: hypothetical protein	MP_ATCC.CDS.1942	MP36.CDS.3563	MP37.CDS.3594	MP38.CDS.3616	MP1.CDS.3614	MP2.CDS.3266	mp39.CDS.3582
cluster253	S	FIG00820669: hypothetical protein	MP_ATCC.CDS.216	MP36.CDS.4189	MP37.CDS.4200	MP38.CDS.4220	MP1.CDS.4230	MP2.CDS.4241	mp39.CDS.4166
cluster762	S	FIG00820669: hypothetical protein	MP_ATCC.CDS.818	MP36.CDS.606	MP37.CDS.665	MP38.CDS.663	MP1.CDS.671	MP2.CDS.669	mp39.CDS.609
cluster2721	S	FIG00820672: hypothetical protein	MP_ATCC.CDS.3125	MP36.CDS.2818	MP37.CDS.2852	MP38.CDS.1126	MP1.CDS.2882	MP2.CDS.2875	mp39.CDS.2844
cluster3047	S	FIG00820677: hypothetical protein	MP_ATCC.CDS.3503	MP36.CDS.974	MP37.CDS.1039	MP38.CDS.1039	MP1.CDS.1045	MP2.CDS.1046	mp39.CDS.979
cluster2645	S	FIG00820680: hypothetical protein	MP_ATCC.CDS.3038	MP36.CDS.3369	MP37.CDS.3400	MP38.CDS.3429	MP1.CDS.3422	MP2.CDS.3458	mp39.CDS.3391
cluster3874	S	FIG00820682: hypothetical protein		MP36.CDS.3484	MP37.CDS.3513	MP38.CDS.3539	MP1.CDS.3535	MP2.CDS.3346	mp39.CDS.3504
cluster1203	S	FIG00820684: hypothetical protein	MP_ATCC.CDS.1320	MP36.CDS.1135	MP37.CDS.1199	MP38.CDS.1255	MP1.CDS.1206	MP2.CDS.1204	mp39.CDS.1144
cluster2602	S	FIG00820699: hypothetical protein	MP_ATCC.CDS.2990	MP36.CDS.3321	MP37.CDS.3353	MP38.CDS.3380	MP1.CDS.3374	MP2.CDS.3506	mp39.CDS.3342
cluster2387	S	FIG00820700: hypothetical protein	MP_ATCC.CDS.2720	MP36.CDS.1633	MP37.CDS.1679	MP38.CDS.1756	MP1.CDS.1700	MP2.CDS.1691	mp39.CDS.1643
cluster1936	S	FIG00820704: hypothetical protein	MP_ATCC.CDS.2175	MP36.CDS.1862	MP37.CDS.1899	MP38.CDS.1980	MP1.CDS.1924	MP2.CDS.1902	mp39.CDS.1863
cluster1579	S	FIG00820705: hypothetical protein	MP_ATCC.CDS.1772	MP36.CDS.3096	MP37.CDS.3126	MP38.CDS.3153	MP1.CDS.3154	MP2.CDS.3731	mp39.CDS.3111
cluster3805	S	FIG00820705: hypothetical protein	MP_ATCC.CDS.1775	MP36.CDS.3093	MP37.CDS.3122		MP1.CDS.3151	MP2.CDS.3734	mp39.CDS.3107
cluster5061	S	FIG00820705: hypothetical protein				MP38.CDS.3150
cluster5772	S	FIG00820705: hypothetical protein				MP38.CDS.3148
cluster2781	S	FIG00820712: hypothetical protein	MP_ATCC.CDS.3193	MP36.CDS.2129	MP37.CDS.2162	MP38.CDS.2244	MP1.CDS.2192	MP2.CDS.2192	mp39.CDS.2123
cluster466	S	FIG00820713: hypothetical protein	MP_ATCC.CDS.471	MP36.CDS.2620	MP37.CDS.2652	MP38.CDS.2727	MP1.CDS.2681	MP2.CDS.2676	mp39.CDS.2644
cluster3814	S	FIG00820720: hypothetical protein	MP_ATCC.CDS.2431	MP36.CDS.3235	MP37.CDS.3264	MP38.CDS.3292		MP2.CDS.3593	mp39.CDS.3251
cluster2935	S	FIG00820722: hypothetical protein	MP_ATCC.CDS.3373	MP36.CDS.2136	MP37.CDS.2169	MP38.CDS.2251	MP1.CDS.2199	MP2.CDS.2199	mp39.CDS.2130
cluster637	S	FIG00820725: hypothetical protein	MP_ATCC.CDS.665	MP36.CDS.2991	MP37.CDS.3022	MP38.CDS.3045	MP1.CDS.3048	MP2.CDS.3837	mp39.CDS.3016
cluster2366	S	FIG00820728: hypothetical protein	MP_ATCC.CDS.2691	MP36.CDS.277	MP37.CDS.329	MP38.CDS.331	MP1.CDS.338	MP2.CDS.337	mp39.CDS.273
cluster977	S	FIG00820729: hypothetical protein	MP_ATCC.CDS.1057	MP36.CDS.840	MP37.CDS.903	MP38.CDS.906	MP1.CDS.909	MP2.CDS.910	mp39.CDS.847
cluster2308	S	FIG00820733: hypothetical protein, Rv0207c	MP_ATCC.CDS.2631	MP36.CDS.215	MP37.CDS.268	MP38.CDS.270	MP1.CDS.276	MP2.CDS.276	mp39.CDS.211
cluster652	S	FIG00820737: hypothetical protein	MP_ATCC.CDS.693	MP36.CDS.3019	MP37.CDS.3049	MP38.CDS.3072	MP1.CDS.3076	MP2.CDS.3809	mp39.CDS.3034
cluster937	S	FIG00820737: hypothetical protein	MP_ATCC.CDS.1014	MP36.CDS.4332	MP37.CDS.860	MP38.CDS.862	MP1.CDS.866	MP2.CDS.866	mp39.CDS.804
cluster1685	S	FIG00820743: hypothetical protein	MP_ATCC.CDS.1899	MP36.CDS.3519	MP37.CDS.3549	MP38.CDS.3573	MP1.CDS.3571	MP2.CDS.3310	mp39.CDS.3538
cluster1608	S	FIG00820754: hypothetical protein	MP_ATCC.CDS.1806	MP36.CDS.3828	MP37.CDS.3845	MP38.CDS.3865	MP1.CDS.3876	MP2.CDS.3004	mp39.CDS.3830
cluster2797	S	FIG00820755: hypothetical protein	MP_ATCC.CDS.3210	MP36.CDS.2332	MP37.CDS.2362	MP38.CDS.2441	MP1.CDS.2396	MP2.CDS.2392	mp39.CDS.2354
cluster694	S	FIG00820757: hypothetical protein	MP_ATCC.CDS.742	MP36.CDS.3068	MP37.CDS.3097	MP38.CDS.3121	MP1.CDS.3125	MP2.CDS.3760	mp39.CDS.3083
cluster993	S	FIG00820765: hypothetical protein	MP_ATCC.CDS.1075	MP36.CDS.3982	MP37.CDS.3998	MP38.CDS.4017	MP1.CDS.4028	MP2.CDS.4038	mp39.CDS.3989
cluster3528	M	FIG00820770: hypothetical membrane protein	MP_ATCC.CDS.4044	MP36.CDS.498	MP37.CDS.559	MP38.CDS.555	MP1.CDS.562	MP2.CDS.559	mp39.CDS.499
cluster659	S	FIG00820771: hypothetical protein	MP_ATCC.CDS.702	MP36.CDS.3027	MP37.CDS.3057	MP38.CDS.3081	MP1.CDS.3085	MP2.CDS.3800	mp39.CDS.3043
cluster572	S	FIG00820775: hypothetical protein	MP_ATCC.CDS.593	MP36.CDS.2921	MP37.CDS.2952	MP38.CDS.2975	MP1.CDS.2978	MP2.CDS.3907	mp39.CDS.2945
cluster2255	S	FIG00820781: hypothetical protein	MP_ATCC.CDS.2566	MP36.CDS.150	MP37.CDS.205	MP38.CDS.205	MP1.CDS.213	MP2.CDS.212	mp39.CDS.146
cluster3180	S	FIG00820785: hypothetical protein	MP_ATCC.CDS.3649	MP36.CDS.1377	MP37.CDS.1441	MP38.CDS.1500	MP1.CDS.1448	MP2.CDS.1443	mp39.CDS.1388
cluster4152	S	FIG00820786: hypothetical protein						MP2.CDS.4218
cluster3221	S	FIG00820789: hypothetical protein	MP_ATCC.CDS.3694	MP36.CDS.1331	MP37.CDS.1393	MP38.CDS.1452	MP1.CDS.1401	MP2.CDS.1397	mp39.CDS.1338
cluster3324	S	FIG00820791: hypothetical protein	MP_ATCC.CDS.3812	MP36.CDS.4226	MP37.CDS.4238	MP38.CDS.4258	MP1.CDS.4267	MP2.CDS.4279	mp39.CDS.4204
cluster2548	S	FIG00820793: hypothetical protein	MP_ATCC.CDS.2929	MP36.CDS.3740	MP37.CDS.3770	MP38.CDS.3791	MP1.CDS.3790	MP2.CDS.3089	mp39.CDS.3760
cluster1266	S	FIG00820811: hypothetical protein	MP_ATCC.CDS.1394	MP36.CDS.1211	MP37.CDS.1273	MP38.CDS.1330	MP1.CDS.1281	MP2.CDS.1278	mp39.CDS.1219
cluster1080	S	FIG00820818: hypothetical protein	MP_ATCC.CDS.1174	MP36.CDS.4083	MP37.CDS.4095	MP38.CDS.4115	MP1.CDS.4126	MP2.CDS.4136	mp39.CDS.4085
cluster2796	S	FIG00820819: hypothetical protein	MP_ATCC.CDS.3209	MP36.CDS.2333	MP37.CDS.2363	MP38.CDS.2442	MP1.CDS.2397	MP2.CDS.2393	mp39.CDS.2355
cluster669	S	FIG00820821: hypothetical protein	MP_ATCC.CDS.714	MP36.CDS.3039	MP37.CDS.3069	MP38.CDS.3093	MP1.CDS.3097	MP2.CDS.3788	mp39.CDS.3055
cluster1718	S	FIG00820824: hypothetical protein	MP_ATCC.CDS.1933	MP36.CDS.3554	MP37.CDS.3585	MP38.CDS.3607	MP1.CDS.3605	MP2.CDS.3275	mp39.CDS.3573
cluster2350	S	FIG00820825: hypothetical protein	MP_ATCC.CDS.2674	MP36.CDS.259	MP37.CDS.312	MP38.CDS.314	MP1.CDS.320	MP2.CDS.320	mp39.CDS.255
cluster1812	S	FIG00820826: hypothetical protein	MP_ATCC.CDS.2036	MP36.CDS.1719	MP37.CDS.1761	MP38.CDS.1841	MP1.CDS.1783	MP2.CDS.1760	mp39.CDS.1721
cluster3832	S	FIG00820835: hypothetical protein	MP_ATCC.CDS.2950	MP36.CDS.3773	MP37.CDS.3792	MP38.CDS.3823		MP2.CDS.3056	mp39.CDS.3780
cluster2824	S	FIG00820845: hypothetical protein	MP_ATCC.CDS.3242	MP36.CDS.2300	MP37.CDS.2331	MP38.CDS.2410	MP1.CDS.2363	MP2.CDS.2361	mp39.CDS.2322
cluster1891	S	FIG00820852: hypothetical protein	MP_ATCC.CDS.2128	MP36.CDS.1813	MP37.CDS.1850	MP38.CDS.1931	MP1.CDS.1875	MP2.CDS.1852	mp39.CDS.1814
cluster2525	S	FIG00820856: hypothetical protein	MP_ATCC.CDS.2903	MP36.CDS.1071	MP37.CDS.1136	MP38.CDS.1192	MP1.CDS.1144	MP2.CDS.1142	mp39.CDS.1082
cluster3486	S	FIG00820863: hypothetical protein	MP_ATCC.CDS.3998	MP36.CDS.2062	MP37.CDS.2098	MP38.CDS.2180	MP1.CDS.2127	MP2.CDS.2125	mp39.CDS.2057
cluster3815	S	FIG00820863: hypothetical protein	MP_ATCC.CDS.2441	MP36.CDS.2914	MP37.CDS.2946		MP1.CDS.2972	MP2.CDS.3913	mp39.CDS.2939
cluster5255	S	FIG00820867: hypothetical protein		MP36.CDS.3424
cluster3886	S	FIG00820868: hypothetical protein	MP_ATCC.CDS.1758	MP36.CDS.3110	MP37.CDS.3140	MP38.CDS.3167			mp39.CDS.3125
cluster249	S	FIG00820873: hypothetical protein	MP_ATCC.CDS.212	MP36.CDS.4193	MP37.CDS.4204	MP38.CDS.4224	MP1.CDS.4234	MP2.CDS.4245	mp39.CDS.4170
cluster2927	S	FIG00820878: hypothetical protein	MP_ATCC.CDS.3364	MP36.CDS.2146	MP37.CDS.2178	MP38.CDS.2260	MP1.CDS.2209	MP2.CDS.2209	mp39.CDS.2139
cluster1445	S	FIG00820885: hypothetical protein	MP_ATCC.CDS.1625	MP36.CDS.2704	MP37.CDS.2735	MP38.CDS.2812	MP1.CDS.2763	MP2.CDS.2759	mp39.CDS.2730
cluster1045	S	FIG00820887: hypothetical protein	MP_ATCC.CDS.1135	MP36.CDS.4044	MP37.CDS.4056	MP38.CDS.4076	MP1.CDS.4087	MP2.CDS.4097	mp39.CDS.4046
cluster1186	S	FIG00820894: hypothetical protein	MP_ATCC.CDS.1296	MP36.CDS.71	MP37.CDS.129	MP38.CDS.126	MP1.CDS.136	MP2.CDS.136	mp39.CDS.71
cluster1945	S	FIG00820895: hypothetical protein	MP_ATCC.CDS.2186	MP36.CDS.1874	MP37.CDS.1910	MP38.CDS.1992	MP1.CDS.1936	MP2.CDS.1914	mp39.CDS.1875
cluster1917	S	FIG00820900: hypothetical protein	MP_ATCC.CDS.2156	MP36.CDS.1843	MP37.CDS.1880	MP38.CDS.1961	MP1.CDS.1905	MP2.CDS.1882	mp39.CDS.1844
cluster3605	S	FIG00820904: hypothetical protein	MP_ATCC.CDS.4133	MP36.CDS.410	MP37.CDS.467	MP38.CDS.467	MP1.CDS.474	MP2.CDS.471	mp39.CDS.411
cluster2973	S	FIG00820906: hypothetical protein	MP_ATCC.CDS.3419	MP36.CDS.890	MP37.CDS.954	MP38.CDS.955	MP1.CDS.959	MP2.CDS.960	mp39.CDS.895
cluster1580	S	FIG00820907: hypothetical protein	MP_ATCC.CDS.1773	MP36.CDS.3095	MP37.CDS.3125	MP38.CDS.3152	MP1.CDS.3153	MP2.CDS.3732	mp39.CDS.3110
cluster1359	S	FIG00820917: hypothetical protein	MP_ATCC.CDS.1526	MP36.CDS.15	MP37.CDS.71	MP38.CDS.71	MP1.CDS.81	MP2.CDS.80	mp39.CDS.14
cluster801	S	FIG00820918: hypothetical protein	MP_ATCC.CDS.862	MP36.CDS.651	MP37.CDS.710	MP38.CDS.708	MP1.CDS.717	MP2.CDS.716	mp39.CDS.654
cluster918	S	FIG00820922: hypothetical protein	MP_ATCC.CDS.990	MP36.CDS.778	MP37.CDS.838	MP38.CDS.835	MP1.CDS.845	MP2.CDS.844	mp39.CDS.782
cluster1091	S	FIG00820925: hypothetical protein	MP_ATCC.CDS.1189	MP36.CDS.4099	MP37.CDS.4110	MP38.CDS.4131	MP1.CDS.4142	MP2.CDS.4152	mp39.CDS.4101
cluster3242	S	FIG00820928: hypothetical protein	MP_ATCC.CDS.3715	MP36.CDS.1310	MP37.CDS.1372	MP38.CDS.1430	MP1.CDS.1380	MP2.CDS.1376	mp39.CDS.1317
cluster2911	S	FIG00820930: hypothetical protein	MP_ATCC.CDS.3347	MP36.CDS.2164	MP37.CDS.2195	MP38.CDS.2277	MP1.CDS.2227	MP2.CDS.2226	mp39.CDS.2156
cluster2153	S	FIG00820935: hypothetical protein	MP_ATCC.CDS.2440	MP36.CDS.2915	MP37.CDS.2947	MP38.CDS.2969	MP1.CDS.2973	MP2.CDS.3912	mp39.CDS.2940
cluster3349	S	FIG00820937: hypothetical protein	MP_ATCC.CDS.3847	MP36.CDS.3868	MP37.CDS.3885	MP38.CDS.3904	MP1.CDS.3917	MP2.CDS.2961	mp39.CDS.3873
cluster3639	S	FIG00820939: hypothetical protein	MP_ATCC.CDS.4172	MP36.CDS.372	MP37.CDS.428	MP38.CDS.429	MP1.CDS.436	MP2.CDS.433	mp39.CDS.372
cluster5010	S	FIG00820940: hypothetical protein		MP36.CDS.931
cluster2270	S	FIG00820956: hypothetical protein	MP_ATCC.CDS.2584	MP36.CDS.169	MP37.CDS.223	MP38.CDS.223	MP1.CDS.231	MP2.CDS.230	mp39.CDS.165
cluster887	S	FIG00820963: hypothetical protein	MP_ATCC.CDS.958	MP36.CDS.746	MP37.CDS.806	MP38.CDS.803	MP1.CDS.813	MP2.CDS.812	mp39.CDS.750
cluster973	I	FIG00820963: Predicted deacetylase	MP_ATCC.CDS.1053	MP36.CDS.836	MP37.CDS.899	MP38.CDS.902	MP1.CDS.905	MP2.CDS.906	mp39.CDS.843
cluster3469	S	FIG00820973: hypothetical protein	MP_ATCC.CDS.3979	MP36.CDS.2042	MP37.CDS.2077	MP38.CDS.2160	MP1.CDS.2107	MP2.CDS.2105	mp39.CDS.2038
cluster218	S	FIG00820984: hypothetical protein	MP_ATCC.CDS.176	MP36.CDS.3253	MP37.CDS.3282	MP38.CDS.3310	MP1.CDS.3306	MP2.CDS.3576	mp39.CDS.3270
cluster116	S	FIG00820990: hypothetical protein	MP_ATCC.CDS.57	MP36.CDS.1659	MP37.CDS.1703	MP38.CDS.1781	MP1.CDS.1725	MP2.CDS.2031	mp39.CDS.1660
cluster2166	S	FIG00821032: hypothetical protein	MP_ATCC.CDS.2457	MP36.CDS.2898	MP37.CDS.2931	MP38.CDS.2951	MP1.CDS.2957	MP2.CDS.3930	mp39.CDS.2923
cluster2839	S	FIG00821033: hypothetical protein	MP_ATCC.CDS.3260	MP36.CDS.2282	MP37.CDS.2311	MP38.CDS.2392	MP1.CDS.2344	MP2.CDS.2341	mp39.CDS.2277
cluster1924	S	FIG00821036: hypothetical protein	MP_ATCC.CDS.2163	MP36.CDS.1850	MP37.CDS.1887	MP38.CDS.1968	MP1.CDS.1912	MP2.CDS.1890	mp39.CDS.1851
cluster3839	S	FIG00821041: hypothetical protein	MP_ATCC.CDS.3137	MP36.CDS.2806	MP37.CDS.2840	MP38.CDS.1114	MP1.CDS.2870	MP2.CDS.2863
cluster2303	S	FIG00821048: hypothetical protein	MP_ATCC.CDS.2624	MP36.CDS.209	MP37.CDS.262	MP38.CDS.263	MP1.CDS.270	MP2.CDS.270	mp39.CDS.205
cluster595	S	FIG00821051: hypothetical protein	MP_ATCC.CDS.619	MP36.CDS.2948	MP37.CDS.2978	MP38.CDS.3001	MP1.CDS.3004	MP2.CDS.3881	mp39.CDS.2971
cluster2779	S	FIG00821053: hypothetical protein	MP_ATCC.CDS.3190	MP36.CDS.2753	MP37.CDS.2787	MP38.CDS.2864	MP1.CDS.2815	MP2.CDS.2809	mp39.CDS.2783
cluster2742	S	FIG00821055: hypothetical protein	MP_ATCC.CDS.3151	MP36.CDS.2792	MP37.CDS.2826	MP38.CDS.2904	MP1.CDS.2856	MP2.CDS.2849	mp39.CDS.2822
cluster2033	S	FIG00821059: hypothetical protein	MP_ATCC.CDS.2285	MP36.CDS.1618	MP37.CDS.1664	MP38.CDS.1741	MP1.CDS.1685	MP2.CDS.1676	mp39.CDS.1628
cluster2791	S	FIG00821060: hypothetical protein	MP_ATCC.CDS.3204	MP36.CDS.2338	MP37.CDS.2368	MP38.CDS.2447	MP1.CDS.2402	MP2.CDS.2398	mp39.CDS.2360
cluster1199	S	FIG00821061: hypothetical protein	MP_ATCC.CDS.1314	MP36.CDS.1129	MP37.CDS.1193	MP38.CDS.1249	MP1.CDS.1200	MP2.CDS.1198	mp39.CDS.1138
cluster3845	S	FIG00821066: hypothetical protein	MP_ATCC.CDS.3382		MP37.CDS.2223	MP38.CDS.2305	MP1.CDS.2255	MP2.CDS.2254	mp39.CDS.2184
cluster2498	S	FIG00821068: hypothetical protein	MP_ATCC.CDS.2871	MP36.CDS.1101	MP37.CDS.1167	MP38.CDS.1224	MP1.CDS.1175	MP2.CDS.1173	mp39.CDS.1113
cluster1759	S	FIG00821069: hypothetical protein	MP_ATCC.CDS.1977	MP36.CDS.3599	MP37.CDS.3629	MP38.CDS.3651	MP1.CDS.3649	MP2.CDS.3230	mp39.CDS.3617
cluster3541	S	FIG00821074: hypothetical protein	MP_ATCC.CDS.4057	MP36.CDS.485	MP37.CDS.544	MP38.CDS.541	MP1.CDS.548	MP2.CDS.545	mp39.CDS.486
cluster3104	S	FIG00821093: hypothetical protein	MP_ATCC.CDS.3565	MP36.CDS.1038	MP37.CDS.1100	MP38.CDS.1100	MP1.CDS.1108	MP2.CDS.1108	mp39.CDS.1045
cluster1751	S	FIG00821109: hypothetical protein	MP_ATCC.CDS.1969	MP36.CDS.3591	MP37.CDS.3621	MP38.CDS.3643	MP1.CDS.3641	MP2.CDS.3238	mp39.CDS.3609
cluster264	S	FIG00821115: hypothetical protein	MP_ATCC.CDS.234	MP36.CDS.1126	MP37.CDS.1190	MP38.CDS.1246	MP1.CDS.1198	MP2.CDS.1196	mp39.CDS.1135
cluster444	S	FIG00821119: hypothetical protein	MP_ATCC.CDS.444	MP36.CDS.2650	MP37.CDS.2680	MP38.CDS.2757	MP1.CDS.2710	MP2.CDS.2705	mp39.CDS.2673
cluster5850	S	FIG00821119: hypothetical protein					MP1.CDS.3038
cluster1355	S	FIG00821131: hypothetical protein	MP_ATCC.CDS.1521	MP36.CDS.10	MP37.CDS.66	MP38.CDS.66	MP1.CDS.76	MP2.CDS.75	mp39.CDS.9
cluster409	S	FIG00821136: hypothetical protein	MP_ATCC.CDS.400	MP36.CDS.2390	MP37.CDS.2421	MP38.CDS.2500	MP1.CDS.2454	MP2.CDS.2451	mp39.CDS.2414
cluster164	S	FIG00821138: hypothetical protein	MP_ATCC.CDS.116	MP36.CDS.3912	MP37.CDS.3929	MP38.CDS.3948	MP1.CDS.3961	MP2.CDS.2917	mp39.CDS.3918
cluster1097	S	FIG00821151: hypothetical protein	MP_ATCC.CDS.1195	MP36.CDS.4105	MP37.CDS.4116	MP38.CDS.4137	MP1.CDS.4148	MP2.CDS.4158	mp39.CDS.4107
cluster3604	S	FIG00821159: hypothetical protein	MP_ATCC.CDS.4132	MP36.CDS.411	MP37.CDS.468	MP38.CDS.468	MP1.CDS.475	MP2.CDS.472	mp39.CDS.412
cluster2727	S	FIG00821164: hypothetical protein	MP_ATCC.CDS.3131	MP36.CDS.2812	MP37.CDS.2846	MP38.CDS.1120	MP1.CDS.2876	MP2.CDS.2869	mp39.CDS.2838
cluster2191	S	FIG00821167: hypothetical protein	MP_ATCC.CDS.2486	MP36.CDS.2868	MP37.CDS.2901	MP38.CDS.2921	MP1.CDS.2929	MP2.CDS.3962	mp39.CDS.2893
cluster3715	S	FIG00821173: hypothetical protein	MP_ATCC.CDS.4258	MP36.CDS.2372	MP37.CDS.2402	MP38.CDS.2481	MP1.CDS.2436	MP2.CDS.2433	mp39.CDS.2395
cluster3065	S	FIG00821176: hypothetical protein	MP_ATCC.CDS.3522	MP36.CDS.994	MP37.CDS.1058	MP38.CDS.1058	MP1.CDS.1064	MP2.CDS.1064	mp39.CDS.999
cluster2019	S	FIG00821191: hypothetical protein	MP_ATCC.CDS.2268	MP36.CDS.3483	MP37.CDS.3512	MP38.CDS.3538	MP1.CDS.3534	MP2.CDS.3347	mp39.CDS.3503
cluster2905	S	FIG00821195: hypothetical protein	MP_ATCC.CDS.3341	MP36.CDS.2170	MP37.CDS.2201	MP38.CDS.2283	MP1.CDS.2233	MP2.CDS.2232	mp39.CDS.2162
cluster1208	S	FIG00821199: hypothetical protein	MP_ATCC.CDS.1327	MP36.CDS.1141	MP37.CDS.1205	MP38.CDS.1261	MP1.CDS.1212	MP2.CDS.1210	mp39.CDS.1151
cluster989	S	FIG00821200: hypothetical protein	MP_ATCC.CDS.1071	MP36.CDS.3978	MP37.CDS.3994	MP38.CDS.4013	MP1.CDS.4024	MP2.CDS.4034	mp39.CDS.3985
cluster739	S	FIG00821203: hypothetical protein	MP_ATCC.CDS.793	MP36.CDS.582	MP37.CDS.640	MP38.CDS.638	MP1.CDS.647	MP2.CDS.644	mp39.CDS.584
cluster514	S	FIG00821218: hypothetical protein	MP_ATCC.CDS.525	MP36.CDS.1940	MP37.CDS.1975	MP38.CDS.2059	MP1.CDS.2001	MP2.CDS.1984	mp39.CDS.1936
cluster3059	S	FIG00821219: hypothetical protein	MP_ATCC.CDS.3516	MP36.CDS.988	MP37.CDS.1052	MP38.CDS.1052	MP1.CDS.1058	MP2.CDS.1058	mp39.CDS.993
cluster3499	S	FIG00821219: hypothetical protein	MP_ATCC.CDS.4012	MP36.CDS.2077	MP37.CDS.2113	MP38.CDS.2194	MP1.CDS.2141	MP2.CDS.2141	mp39.CDS.2073
cluster2163	S	FIG00821224: hypothetical protein	MP_ATCC.CDS.2454	MP36.CDS.2901	MP37.CDS.2934	MP38.CDS.2955	MP1.CDS.2960	MP2.CDS.3927	mp39.CDS.2927
cluster2383	S	FIG00821234: hypothetical protein	MP_ATCC.CDS.2716	MP36.CDS.1637	MP37.CDS.1683	MP38.CDS.1760	MP1.CDS.1704	MP2.CDS.1695	mp39.CDS.1647
cluster289	S	FIG00821236: hypothetical protein	MP_ATCC.CDS.263	MP36.CDS.2529	MP37.CDS.2560	MP38.CDS.2635	MP1.CDS.2589	MP2.CDS.2585	mp39.CDS.2551
cluster996	S	FIG00821239: hypothetical protein	MP_ATCC.CDS.1081	MP36.CDS.3987	MP37.CDS.4002	MP38.CDS.4021	MP1.CDS.4032	MP2.CDS.4042	mp39.CDS.3993
cluster1354	S	FIG00821242: hypothetical protein	MP_ATCC.CDS.1520	MP36.CDS.9	MP37.CDS.65	MP38.CDS.65	MP1.CDS.75	MP2.CDS.74	mp39.CDS.8
cluster90	S	FIG00821243: hypothetical protein	MP_ATCC.CDS.25	MP36.CDS.1693	MP37.CDS.1736	MP38.CDS.1814	MP1.CDS.1758	MP2.CDS.1734	mp39.CDS.1695
cluster1063	S	FIG00821247: hypothetical protein	MP_ATCC.CDS.1154	MP36.CDS.4063	MP37.CDS.4075	MP38.CDS.4095	MP1.CDS.4106	MP2.CDS.4116	mp39.CDS.4065
cluster4014	S	FIG00821256: hypothetical protein			MP37.CDS.2749	MP38.CDS.2826	MP1.CDS.2777
cluster2149	S	FIG00821261: hypothetical protein	MP_ATCC.CDS.2436	MP36.CDS.3241	MP37.CDS.3270	MP38.CDS.3298	MP1.CDS.3294	MP2.CDS.3588	mp39.CDS.3257
cluster2395	S	FIG00821263: hypothetical protein	MP_ATCC.CDS.2733	MP36.CDS.1905	MP37.CDS.1941	MP38.CDS.2023	MP1.CDS.1967	MP2.CDS.1948	mp39.CDS.1906
cluster3288	S	FIG00821266: hypothetical protein	MP_ATCC.CDS.3769	MP36.CDS.3690	MP37.CDS.3720	MP38.CDS.3742	MP1.CDS.3739	MP2.CDS.3140	mp39.CDS.3709
cluster2213	S	FIG00821282: hypothetical protein	MP_ATCC.CDS.2520	MP36.CDS.101	MP37.CDS.159	MP38.CDS.158	MP1.CDS.167	MP2.CDS.166	mp39.CDS.100
cluster988	S	FIG00821290: hypothetical protein	MP_ATCC.CDS.1069	MP36.CDS.3976	MP37.CDS.3992	MP38.CDS.4011	MP1.CDS.4022	MP2.CDS.4032	mp39.CDS.3983
cluster1952	S	FIG00821291: hypothetical protein	MP_ATCC.CDS.2193	MP36.CDS.1881	MP37.CDS.1918	MP38.CDS.1999	MP1.CDS.1943	MP2.CDS.1922	mp39.CDS.1882
cluster3818	S	FIG00821308: hypothetical protein	MP_ATCC.CDS.2607	MP36.CDS.192		MP38.CDS.246	MP1.CDS.254	MP2.CDS.253	mp39.CDS.188
cluster4162	S	FIG00821308: hypothetical protein			MP37.CDS.246
cluster3056	S	FIG00821313: hypothetical protein	MP_ATCC.CDS.3513	MP36.CDS.985	MP37.CDS.1049	MP38.CDS.1049	MP1.CDS.1055	MP2.CDS.1055	mp39.CDS.990
cluster3896	S	FIG00821326: hypothetical protein	MP_ATCC.CDS.3259	MP36.CDS.2283		MP38.CDS.2393		MP2.CDS.2342	mp39.CDS.2278
cluster3341	S	FIG00821329: hypothetical protein	MP_ATCC.CDS.3831	MP36.CDS.4208	MP37.CDS.4219	MP38.CDS.4239	MP1.CDS.4249	MP2.CDS.4260	mp39.CDS.4185
cluster313	S	FIG00821330: hypothetical protein	MP_ATCC.CDS.293	MP36.CDS.2500	MP37.CDS.2530	MP38.CDS.2606	MP1.CDS.2561	MP2.CDS.2557	mp39.CDS.2523
cluster4585	S	FIG00821330: hypothetical protein		MP36.CDS.2499
cluster2944	S	FIG00821333: hypothetical protein	MP_ATCC.CDS.3383	MP36.CDS.2191	MP37.CDS.2222	MP38.CDS.2304	MP1.CDS.2254	MP2.CDS.2253	mp39.CDS.2183
cluster797	S	FIG00821340: hypothetical protein	MP_ATCC.CDS.858	MP36.CDS.647	MP37.CDS.706	MP38.CDS.704	MP1.CDS.713	MP2.CDS.712	mp39.CDS.650
cluster4005	S	FIG00821345: hypothetical protein		MP36.CDS.4353			MP1.CDS.4303	MP2.CDS.4310
cluster118	S	FIG00821351: hypothetical protein	MP_ATCC.CDS.59	MP36.CDS.1657	MP37.CDS.1701	MP38.CDS.1779	MP1.CDS.1723	MP2.CDS.2033	mp39.CDS.1658
cluster2538	S	FIG00821351: hypothetical protein	MP_ATCC.CDS.2919	MP36.CDS.3730	MP37.CDS.3760	MP38.CDS.3781	MP1.CDS.3779	MP2.CDS.3099	mp39.CDS.3750
cluster3831	S	FIG00821351: hypothetical protein	MP_ATCC.CDS.2918	MP36.CDS.3729		MP38.CDS.3780	MP1.CDS.3778	MP2.CDS.3100	mp39.CDS.3749
cluster1581	S	FIG00821357: hypothetical protein	MP_ATCC.CDS.1774	MP36.CDS.3094	MP37.CDS.3124	MP38.CDS.3151	MP1.CDS.3152	MP2.CDS.3733	mp39.CDS.3109
cluster811	S	FIG00821357: hypothetical protein	MP_ATCC.CDS.873	MP36.CDS.662	MP37.CDS.721	MP38.CDS.719	MP1.CDS.728	MP2.CDS.727	mp39.CDS.665
cluster2863	S	FIG00821360: hypothetical protein	MP_ATCC.CDS.3288	MP36.CDS.2252	MP37.CDS.2282	MP38.CDS.2366	MP1.CDS.2316	MP2.CDS.2313	mp39.CDS.2251
cluster1448	S	FIG00821364: hypothetical protein	MP_ATCC.CDS.1628	MP36.CDS.2707	MP37.CDS.2738	MP38.CDS.2815	MP1.CDS.2766	MP2.CDS.2762	mp39.CDS.2733
cluster1988	S	FIG00821384: hypothetical protein	MP_ATCC.CDS.2233	MP36.CDS.2108	MP37.CDS.2143	MP38.CDS.2224	MP1.CDS.2172	MP2.CDS.2171	mp39.CDS.2104
cluster4359	S	PE-PGRS virulence associated protein	MP_ATCC.CDS.2705
cluster3651	S	FIG00821392: hypothetical protein	MP_ATCC.CDS.4185	MP36.CDS.1256	MP37.CDS.1316	MP38.CDS.1372	MP1.CDS.1323	MP2.CDS.1321	mp39.CDS.1262
cluster3046	S	FIG00821394: hypothetical protein	MP_ATCC.CDS.3502	MP36.CDS.973	MP37.CDS.1038	MP38.CDS.1038	MP1.CDS.1044	MP2.CDS.1045	mp39.CDS.978
cluster3803	S	FIG00821399: hypothetical protein	MP_ATCC.CDS.1632	MP36.CDS.2711		MP38.CDS.2819	MP1.CDS.2770	MP2.CDS.2766	mp39.CDS.2738
cluster3013	S	FIG00821400: hypothetical protein	MP_ATCC.CDS.3464	MP36.CDS.936	MP37.CDS.1002	MP38.CDS.1002	MP1.CDS.1006	MP2.CDS.1007	mp39.CDS.942
cluster728	S	FIG00821404: hypothetical protein	MP_ATCC.CDS.782	MP36.CDS.571	MP37.CDS.629	MP38.CDS.627	MP1.CDS.636	MP2.CDS.633	mp39.CDS.573
cluster2880	S	FIG00821405: hypothetical protein	MP_ATCC.CDS.3312	MP36.CDS.862	MP37.CDS.925	MP38.CDS.928	MP1.CDS.931	MP2.CDS.933	mp39.CDS.868
cluster3849	S	FIG00821408: hypothetical protein	MP_ATCC.CDS.3653	MP36.CDS.1373	MP37.CDS.1437		MP1.CDS.1444	MP2.CDS.1439	mp39.CDS.1384
cluster2932	S	FIG00821415: hypothetical protein	MP_ATCC.CDS.3370	MP36.CDS.2139	MP37.CDS.2172	MP38.CDS.2254	MP1.CDS.2202	MP2.CDS.2202	mp39.CDS.2133
cluster2296	S	FIG00821418: hypothetical protein	MP_ATCC.CDS.2614	MP36.CDS.199	MP37.CDS.253	MP38.CDS.253	MP1.CDS.261	MP2.CDS.260	mp39.CDS.195
cluster2069	S	FIG00821425: hypothetical protein	MP_ATCC.CDS.2333	MP36.CDS.344	MP37.CDS.399	MP38.CDS.401	MP1.CDS.407	MP2.CDS.405	mp39.CDS.343
cluster241	S	FIG00821429: hypothetical protein	MP_ATCC.CDS.203	MP36.CDS.2561	MP37.CDS.2593	MP38.CDS.2667	MP1.CDS.2622	MP2.CDS.2617	mp39.CDS.2583
cluster877	S	FIG00821437: hypothetical protein	MP_ATCC.CDS.946	MP36.CDS.735	MP37.CDS.795	MP38.CDS.792	MP1.CDS.802	MP2.CDS.801	mp39.CDS.739
cluster1692	S	FIG00821439: hypothetical protein	MP_ATCC.CDS.1906	MP36.CDS.3526	MP37.CDS.3556	MP38.CDS.3580	MP1.CDS.3578	MP2.CDS.3303	mp39.CDS.3545
cluster3546	S	FIG00821442: hypothetical protein	MP_ATCC.CDS.4062	MP36.CDS.480	MP37.CDS.538	MP38.CDS.536	MP1.CDS.543	MP2.CDS.540	mp39.CDS.481
cluster3929	S	FIG00821445: hypothetical protein	MP_ATCC.CDS.2400	MP36.CDS.360		MP38.CDS.417	MP1.CDS.424
cluster1113	S	FIG00821447: hypothetical protein	MP_ATCC.CDS.1211	MP36.CDS.4121	MP37.CDS.4132	MP38.CDS.4153	MP1.CDS.4164	MP2.CDS.4174	mp39.CDS.2309
cluster2330	S	FIG00821454: hypothetical protein	MP_ATCC.CDS.2653	MP36.CDS.237	MP37.CDS.290	MP38.CDS.292	MP1.CDS.298	MP2.CDS.298	mp39.CDS.233
cluster1496	S	FIG00821456: hypothetical protein	MP_ATCC.CDS.1681	MP36.CDS.3190	MP37.CDS.3218	MP38.CDS.3246	MP1.CDS.3247	MP2.CDS.3637	mp39.CDS.3203
cluster3271	S	FIG00821458: hypothetical protein	MP_ATCC.CDS.3749	MP36.CDS.3710	MP37.CDS.3740	MP38.CDS.3762	MP1.CDS.3760	MP2.CDS.3119	mp39.CDS.3729
cluster688	S	FIG00821480: hypothetical protein	MP_ATCC.CDS.735	MP36.CDS.3061	MP37.CDS.3090	MP38.CDS.3114	MP1.CDS.3118	MP2.CDS.3767	mp39.CDS.3076
cluster254	S	FIG00821485: hypothetical protein	MP_ATCC.CDS.217	MP36.CDS.4188	MP37.CDS.4199	MP38.CDS.4219	MP1.CDS.4229	MP2.CDS.4240	mp39.CDS.4165
cluster2887	S	FIG00821487: hypothetical protein	MP_ATCC.CDS.3319	MP36.CDS.855	MP37.CDS.918	MP38.CDS.921	MP1.CDS.924	MP2.CDS.926	mp39.CDS.861
cluster3342	S	FIG00821489: hypothetical protein	MP_ATCC.CDS.3832	MP36.CDS.4207	MP37.CDS.4218	MP38.CDS.4238	MP1.CDS.4248	MP2.CDS.4259	mp39.CDS.4184
cluster2528	S	FIG00821497: hypothetical protein	MP_ATCC.CDS.2907	MP36.CDS.1067	MP37.CDS.1132	MP38.CDS.1188	MP1.CDS.1140	MP2.CDS.1139	mp39.CDS.1079
cluster2155	S	FIG00821498: hypothetical protein	MP_ATCC.CDS.2444	MP36.CDS.2911	MP37.CDS.2943	MP38.CDS.2965	MP1.CDS.2970	MP2.CDS.3916	mp39.CDS.2937
cluster433	S	FIG00821502: hypothetical protein	MP_ATCC.CDS.430	MP36.CDS.3852	MP37.CDS.3869	MP38.CDS.3888	MP1.CDS.3901	MP2.CDS.2977	mp39.CDS.3857
cluster2220	S	FIG00821503: hypothetical protein	MP_ATCC.CDS.2528	MP36.CDS.110	MP37.CDS.167	MP38.CDS.167	MP1.CDS.175	MP2.CDS.174	mp39.CDS.109
cluster772	S	FIG00821513: hypothetical protein	MP_ATCC.CDS.828	MP36.CDS.616	MP37.CDS.676	MP38.CDS.674	MP1.CDS.682	MP2.CDS.680	mp39.CDS.620
cluster929	S	FIG00821514: hypothetical protein	MP_ATCC.CDS.1002	MP36.CDS.790	MP37.CDS.850	MP38.CDS.847	MP1.CDS.857	MP2.CDS.856	mp39.CDS.794
cluster1621	S	FIG00821517: hypothetical protein	MP_ATCC.CDS.1821	MP36.CDS.1478	MP37.CDS.1538	MP38.CDS.1598	MP1.CDS.1548	MP2.CDS.1540	mp39.CDS.1487
cluster2815	S	FIG00821521: hypothetical protein	MP_ATCC.CDS.3231	MP36.CDS.2310	MP37.CDS.2340	MP38.CDS.2419	MP1.CDS.2374	MP2.CDS.2371	mp39.CDS.2332
cluster332	S	FIG00821541: hypothetical protein	MP_ATCC.CDS.316	MP36.CDS.2475	MP37.CDS.2506	MP38.CDS.2585	MP1.CDS.2539	MP2.CDS.2535	mp39.CDS.2500
cluster2618	S	FIG00821545: hypothetical protein	MP_ATCC.CDS.3008	MP36.CDS.3338	MP37.CDS.3370	MP38.CDS.3398	MP1.CDS.3391	MP2.CDS.3489	mp39.CDS.3359
cluster414	S	FIG00821549: hypothetical protein	MP_ATCC.CDS.405	MP36.CDS.2385	MP37.CDS.2416	MP38.CDS.2495	MP1.CDS.2449	MP2.CDS.2446	mp39.CDS.2409
cluster4527	S	FIG00821552: hypothetical protein			MP37.CDS.1632
cluster4360	D	Cell division initiation protein	MP_ATCC.CDS.2707
cluster596	S	FIG00821557: hypothetical protein	MP_ATCC.CDS.620	MP36.CDS.2949	MP37.CDS.2979	MP38.CDS.3002	MP1.CDS.3005	MP2.CDS.3880	mp39.CDS.2972
cluster4022	S	FIG00821562: hypothetical protein							mp39.CDS.3428;mp39.CDS.3446
cluster301	S	FIG00821564: hypothetical protein	MP_ATCC.CDS.281	MP36.CDS.2512	MP37.CDS.2543	MP38.CDS.2618	MP1.CDS.2573	MP2.CDS.2569	mp39.CDS.2535
cluster2183	S	FIG00821576: hypothetical protein	MP_ATCC.CDS.2478	MP36.CDS.2876	MP37.CDS.2909	MP38.CDS.2929	MP1.CDS.2937	MP2.CDS.3954	mp39.CDS.2901
cluster246	S	FIG00821579: hypothetical protein	MP_ATCC.CDS.209	MP36.CDS.4196	MP37.CDS.4207	MP38.CDS.4227	MP1.CDS.4237	MP2.CDS.4248	mp39.CDS.4173
cluster1032	S	FIG00821580: hypothetical protein	MP_ATCC.CDS.1121	MP36.CDS.4028	MP37.CDS.4043	MP38.CDS.4061	MP1.CDS.4073	MP2.CDS.4082	mp39.CDS.4032
cluster416	S	FIG00821592: hypothetical protein	MP_ATCC.CDS.407	MP36.CDS.2383	MP37.CDS.2414	MP38.CDS.2493	MP1.CDS.2447	MP2.CDS.2444	mp39.CDS.2407
cluster2660	S	FIG00821598: hypothetical protein	MP_ATCC.CDS.3053	MP36.CDS.3384	MP37.CDS.3415	MP38.CDS.3444	MP1.CDS.3437	MP2.CDS.3443	mp39.CDS.3407
cluster3969	S	FIG00821602: hypothetical protein	MP_ATCC.CDS.1400	MP36.CDS.1217				MP2.CDS.1284
cluster2972	S	FIG00821610: hypothetical protein	MP_ATCC.CDS.3418	MP36.CDS.889	MP37.CDS.953	MP38.CDS.954	MP1.CDS.958	MP2.CDS.959	mp39.CDS.894
cluster2431	S	FIG00821636: hypothetical protein	MP_ATCC.CDS.2794	MP36.CDS.1540	MP37.CDS.1599	MP38.CDS.1669	MP1.CDS.1610	MP2.CDS.1602	mp39.CDS.1549
cluster513	S	FIG00821637: hypothetical protein	MP_ATCC.CDS.524	MP36.CDS.1941	MP37.CDS.1976	MP38.CDS.2060	MP1.CDS.2002	MP2.CDS.1985	mp39.CDS.1937
cluster2340	S	FIG00821638: hypothetical protein	MP_ATCC.CDS.2663	MP36.CDS.248	MP37.CDS.301	MP38.CDS.303	MP1.CDS.309	MP2.CDS.309	mp39.CDS.244
cluster796	S	FIG00821655: hypothetical protein	MP_ATCC.CDS.857	MP36.CDS.646	MP37.CDS.705	MP38.CDS.703	MP1.CDS.712	MP2.CDS.711	mp39.CDS.649
cluster696	S	FIG00821656: hypothetical protein	MP_ATCC.CDS.744	MP36.CDS.3071	MP37.CDS.3100	MP38.CDS.3124	MP1.CDS.3128	MP2.CDS.3757	mp39.CDS.3086
cluster698	S	FIG00821656: hypothetical protein	MP_ATCC.CDS.747	MP36.CDS.3074	MP37.CDS.3103	MP38.CDS.3127	MP1.CDS.3131	MP2.CDS.3754	mp39.CDS.3089
cluster2975	S	FIG00821659: hypothetical protein	MP_ATCC.CDS.3422	MP36.CDS.893	MP37.CDS.957	MP38.CDS.958	MP1.CDS.962	MP2.CDS.963	mp39.CDS.897
cluster932	S	FIG00821670: hypothetical protein	MP_ATCC.CDS.1005	MP36.CDS.793	MP37.CDS.853	MP38.CDS.850	MP1.CDS.860	MP2.CDS.859	mp39.CDS.797
cluster2876	S	FIG00821672: hypothetical protein	MP_ATCC.CDS.3305	MP36.CDS.43	MP37.CDS.100	MP38.CDS.99	MP1.CDS.109	MP2.CDS.109	mp39.CDS.43
cluster4361	C	Ferredoxin--NADP(+) reductase, actinobacterial (eukaryote-like) type (EC 1.18.1.2)	MP_ATCC.CDS.3071
cluster1256	S	FIG00821686: hypothetical protein	MP_ATCC.CDS.1384	MP36.CDS.1201	MP37.CDS.1263	MP38.CDS.1320	MP1.CDS.1271	MP2.CDS.1268	mp39.CDS.1209
cluster2243	S	FIG00821695: hypothetical protein	MP_ATCC.CDS.2554	MP36.CDS.137	MP37.CDS.193	MP38.CDS.193	MP1.CDS.201	MP2.CDS.200	mp39.CDS.134
cluster4042	S	FIG00821697: hypothetical protein		MP36.CDS.1036					mp39.CDS.1043
cluster2793	S	FIG00821698: hypothetical protein	MP_ATCC.CDS.3206	MP36.CDS.2336	MP37.CDS.2366	MP38.CDS.2445	MP1.CDS.2400	MP2.CDS.2396	mp39.CDS.2358
cluster1056	S	FIG00821722: hypothetical protein	MP_ATCC.CDS.1147	MP36.CDS.4056	MP37.CDS.4068	MP38.CDS.4088	MP1.CDS.4099	MP2.CDS.4109	mp39.CDS.4058
cluster3126	S	FIG00821723: hypothetical protein	MP_ATCC.CDS.3590	MP36.CDS.2225	MP37.CDS.2255	MP38.CDS.2338	MP1.CDS.2286	MP2.CDS.2285	mp39.CDS.2221
cluster2969	S	FIG00821728: hypothetical protein	MP_ATCC.CDS.3412	MP36.CDS.884	MP37.CDS.946	MP38.CDS.949	MP1.CDS.952	MP2.CDS.954	mp39.CDS.889
cluster700	S	FIG00821734: hypothetical protein	MP_ATCC.CDS.750	MP36.CDS.3076	MP37.CDS.3106	MP38.CDS.3130	MP1.CDS.3134	MP2.CDS.3751	mp39.CDS.3092
cluster234	S	FIG00821748: hypothetical protein	MP_ATCC.CDS.196	MP36.CDS.2200	MP37.CDS.2232	MP38.CDS.2314	MP1.CDS.2263	MP2.CDS.2262	mp39.CDS.2198
cluster74	S	FIG00821756: hypothetical protein	MP_ATCC.CDS.7	MP36.CDS.1710	MP37.CDS.1753	MP38.CDS.1831	MP1.CDS.1775	MP2.CDS.1751	mp39.CDS.1712
cluster309	S	FIG00821774: hypothetical protein	MP_ATCC.CDS.289	MP36.CDS.2504	MP37.CDS.2534	MP38.CDS.2610	MP1.CDS.2565	MP2.CDS.2561	mp39.CDS.2527
cluster2037	S	FIG00821775: hypothetical protein	MP_ATCC.CDS.2289	MP36.CDS.1614	MP37.CDS.1660	MP38.CDS.1737	MP1.CDS.1681	MP2.CDS.1672	mp39.CDS.1624
cluster1195	S	FIG00821781: hypothetical protein	MP_ATCC.CDS.1305	MP36.CDS.80	MP37.CDS.138	MP38.CDS.135	MP1.CDS.145	MP2.CDS.145	mp39.CDS.80
cluster2659	S	FIG00821784: hypothetical protein	MP_ATCC.CDS.3052	MP36.CDS.3383	MP37.CDS.3414	MP38.CDS.3443	MP1.CDS.3436	MP2.CDS.3444	mp39.CDS.3406
cluster1705	S	FIG00821786: hypothetical protein	MP_ATCC.CDS.1920	MP36.CDS.3541	MP37.CDS.3572	MP38.CDS.3594	MP1.CDS.3592	MP2.CDS.3288	mp39.CDS.3560
cluster2777	S	FIG00821793: hypothetical protein	MP_ATCC.CDS.3188	MP36.CDS.2755	MP37.CDS.2789	MP38.CDS.2866	MP1.CDS.2817	MP2.CDS.2811	mp39.CDS.2785
cluster290	S	FIG00821808: hypothetical protein	MP_ATCC.CDS.264	MP36.CDS.2528	MP37.CDS.2559	MP38.CDS.2634	MP1.CDS.2588	MP2.CDS.2584	mp39.CDS.2550
cluster3351	S	FIG00821812: hypothetical protein	MP_ATCC.CDS.3849	MP36.CDS.3866	MP37.CDS.3883	MP38.CDS.3902	MP1.CDS.3915	MP2.CDS.2963	mp39.CDS.3871
cluster2695	S	FIG00821819: hypothetical protein	MP_ATCC.CDS.3096	MP36.CDS.2847	MP37.CDS.2881	MP38.CDS.1155	MP1.CDS.2911	MP2.CDS.3982	mp39.CDS.2874
cluster5291	S	FIG00821835: hypothetical protein		MP36.CDS.3651
cluster971	S	FIG00821840: hypothetical protein	MP_ATCC.CDS.1051	MP36.CDS.834	MP37.CDS.897	MP38.CDS.900	MP1.CDS.903	MP2.CDS.904	mp39.CDS.841
cluster2028	S	FIG00821853: hypothetical protein	MP_ATCC.CDS.2280	MP36.CDS.1624	MP37.CDS.1670	MP38.CDS.1747	MP1.CDS.1691	MP2.CDS.1682	mp39.CDS.1634
cluster1629	S	FIG00821860: hypothetical protein	MP_ATCC.CDS.1831	MP36.CDS.1468	MP37.CDS.1528	MP38.CDS.1588	MP1.CDS.1538	MP2.CDS.1530	mp39.CDS.1477
cluster2152	S	FIG00821862: hypothetical protein	MP_ATCC.CDS.2439	MP36.CDS.2916	MP37.CDS.2948	MP38.CDS.2970	MP1.CDS.2974	MP2.CDS.3911	mp39.CDS.2941
cluster1837	S	FIG00821863: hypothetical protein	MP_ATCC.CDS.2061	MP36.CDS.1744	MP37.CDS.1786	MP38.CDS.1866	MP1.CDS.1808	MP2.CDS.1785	mp39.CDS.1746
cluster296	S	FIG00821864: hypothetical protein	MP_ATCC.CDS.274	MP36.CDS.2519	MP37.CDS.2550	MP38.CDS.2625	MP1.CDS.2579	MP2.CDS.2575	mp39.CDS.2541
cluster300	S	FIG00821865: hypothetical protein	MP_ATCC.CDS.280	MP36.CDS.2513	MP37.CDS.2544	MP38.CDS.2619	MP1.CDS.2574	MP2.CDS.2570	mp39.CDS.2536
cluster1092	S	FIG00821869: hypothetical protein	MP_ATCC.CDS.1190	MP36.CDS.4100	MP37.CDS.4111	MP38.CDS.4132	MP1.CDS.4143	MP2.CDS.4153	mp39.CDS.4102
cluster2569	S	FIG00821870: hypothetical protein	MP_ATCC.CDS.2953	MP36.CDS.3776	MP37.CDS.3795	MP38.CDS.3826	MP1.CDS.3826	MP2.CDS.3053	mp39.CDS.3783
cluster2952	S	FIG00821878: hypothetical protein	MP_ATCC.CDS.3393	MP36.CDS.2205	MP37.CDS.2237	MP38.CDS.2319	MP1.CDS.2268	MP2.CDS.2267	mp39.CDS.2203
cluster2106	S	FIG00821889: hypothetical protein	MP_ATCC.CDS.2373	MP36.CDS.304	MP37.CDS.359	MP38.CDS.360	MP1.CDS.367	MP2.CDS.365	mp39.CDS.302
cluster3034	S	FIG00821893: hypothetical protein	MP_ATCC.CDS.3490	MP36.CDS.961	MP37.CDS.1026	MP38.CDS.1026	MP1.CDS.1032	MP2.CDS.1033	mp39.CDS.966
cluster389	S	FIG00821894: hypothetical protein	MP_ATCC.CDS.380	MP36.CDS.2412	MP37.CDS.2442	MP38.CDS.2522	MP1.CDS.2476	MP2.CDS.2472	mp39.CDS.2436
cluster2379	S	FIG00821895: hypothetical protein	MP_ATCC.CDS.2711	MP36.CDS.1642	MP37.CDS.1687	MP38.CDS.1765	MP1.CDS.1709	MP2.CDS.1700	mp39.CDS.1651
cluster1961	S	FIG00821912: hypothetical protein	MP_ATCC.CDS.2202	MP36.CDS.1890	MP37.CDS.1927	MP38.CDS.2008	MP1.CDS.1952	MP2.CDS.1931	mp39.CDS.1891
cluster1110	S	FIG00821932: hypothetical protein	MP_ATCC.CDS.1208	MP36.CDS.4118	MP37.CDS.4129	MP38.CDS.4150	MP1.CDS.4161	MP2.CDS.4171	mp39.CDS.2306
cluster3768	S	FIG00821935: hypothetical protein	MP_ATCC.CDS.674	MP36.CDS.3000	MP37.CDS.3030	MP38.CDS.3053	MP1.CDS.3057	MP2.CDS.3828
cluster3579	S	FIG00821936: hypothetical protein	MP_ATCC.CDS.4101	MP36.CDS.441	MP37.CDS.498	MP38.CDS.497	MP1.CDS.504	MP2.CDS.501	mp39.CDS.442
cluster2909	S	FIG00821945: hypothetical protein	MP_ATCC.CDS.3345	MP36.CDS.2166	MP37.CDS.2197	MP38.CDS.2279	MP1.CDS.2229	MP2.CDS.2228	mp39.CDS.2158
cluster799	S	FIG00821968: hypothetical protein	MP_ATCC.CDS.860	MP36.CDS.649	MP37.CDS.708	MP38.CDS.706	MP1.CDS.715	MP2.CDS.714	mp39.CDS.652
cluster350	S	FIG00821976: hypothetical protein	MP_ATCC.CDS.335	MP36.CDS.2456	MP37.CDS.2487	MP38.CDS.2566	MP1.CDS.2520	MP2.CDS.2516	mp39.CDS.2481
cluster2089	S	FIG00821990: hypothetical protein	MP_ATCC.CDS.2353	MP36.CDS.324	MP37.CDS.379	MP38.CDS.380	MP1.CDS.387	MP2.CDS.385	mp39.CDS.323
cluster586	S	FIG00822000: hypothetical protein	MP_ATCC.CDS.608	MP36.CDS.2937	MP37.CDS.2967	MP38.CDS.2990	MP1.CDS.2993	MP2.CDS.3892	mp39.CDS.2960
cluster4062	S	FIG00822008: hypothetical protein			MP37.CDS.528	MP38.CDS.526
cluster699	S	FIG00822019: hypothetical protein	MP_ATCC.CDS.749	MP36.CDS.3075	MP37.CDS.3105	MP38.CDS.3129	MP1.CDS.3133	MP2.CDS.3752	mp39.CDS.3091
cluster3754	S	FIG00822023: hypothetical protein	MP_ATCC.CDS.64	MP36.CDS.1652	MP37.CDS.1696	MP38.CDS.1774	MP1.CDS.1718	MP2.CDS.2038
cluster3489	S	FIG00822024: hypothetical protein	MP_ATCC.CDS.4001	MP36.CDS.2065	MP37.CDS.2101	MP38.CDS.2183	MP1.CDS.2130	MP2.CDS.2128	mp39.CDS.2060
cluster2873	S	FIG00822025: hypothetical protein	MP_ATCC.CDS.3299	MP36.CDS.2241	MP37.CDS.2271	MP38.CDS.2355	MP1.CDS.2305	MP2.CDS.2302	mp39.CDS.2240
cluster1384	S	FIG00822036: hypothetical protein	MP_ATCC.CDS.1552	MP36.CDS.41	MP37.CDS.98	MP38.CDS.97	MP1.CDS.107	MP2.CDS.107	mp39.CDS.41
cluster2642	S	FIG00822056: hypothetical protein	MP_ATCC.CDS.3034	MP36.CDS.3364	MP37.CDS.3394	MP38.CDS.3424	MP1.CDS.3417	MP2.CDS.3463	mp39.CDS.3386
cluster1214	S	FIG00822063: hypothetical protein	MP_ATCC.CDS.1333	MP36.CDS.1147	MP37.CDS.1211	MP38.CDS.1267	MP1.CDS.1218	MP2.CDS.1216	mp39.CDS.1157
cluster3643	S	FIG00822066: hypothetical protein	MP_ATCC.CDS.4176	MP36.CDS.368	MP37.CDS.424	MP38.CDS.425	MP1.CDS.432	MP2.CDS.429	mp39.CDS.368
cluster2164	S	FIG00822089: hypothetical protein	MP_ATCC.CDS.2455	MP36.CDS.2900	MP37.CDS.2933	MP38.CDS.2953	MP1.CDS.2959	MP2.CDS.3928	mp39.CDS.2925
cluster4077	S	FIG00822089: hypothetical protein				MP38.CDS.2954			mp39.CDS.2926
cluster1184	S	FIG00822098: hypothetical protein	MP_ATCC.CDS.1294	MP36.CDS.69	MP37.CDS.127	MP38.CDS.124	MP1.CDS.134	MP2.CDS.134	mp39.CDS.69
cluster2560	S	FIG00822099: hypothetical protein	MP_ATCC.CDS.2943	MP36.CDS.3766	MP37.CDS.3785	MP38.CDS.3816	MP1.CDS.3816	MP2.CDS.3064	mp39.CDS.3773
cluster2151	S	FIG00822109: hypothetical protein	MP_ATCC.CDS.2438	MP36.CDS.2917	MP37.CDS.2949	MP38.CDS.2971	MP1.CDS.2975	MP2.CDS.3910	mp39.CDS.2942
cluster3208	S	FIG00822111: hypothetical protein	MP_ATCC.CDS.3681	MP36.CDS.1344	MP37.CDS.1406	MP38.CDS.1465	MP1.CDS.1414	MP2.CDS.1410	mp39.CDS.1351
cluster2175	S	FIG00822113: hypothetical protein	MP_ATCC.CDS.2467	MP36.CDS.2887	MP37.CDS.2920	MP38.CDS.2940	MP1.CDS.2947	MP2.CDS.3941	mp39.CDS.2912
cluster3350	S	FIG00822113: hypothetical protein	MP_ATCC.CDS.3848	MP36.CDS.3867	MP37.CDS.3884	MP38.CDS.3903	MP1.CDS.3916	MP2.CDS.2962	mp39.CDS.3872
cluster2782	S	FIG00822138: hypothetical protein	MP_ATCC.CDS.3194	MP36.CDS.2128	MP37.CDS.2161	MP38.CDS.2243	MP1.CDS.2191	MP2.CDS.2191	mp39.CDS.2122
cluster2411	S	FIG00822160: hypothetical protein	MP_ATCC.CDS.2773	MP36.CDS.1560	MP37.CDS.1619	MP38.CDS.1689	MP1.CDS.1631	MP2.CDS.1623	mp39.CDS.1571
cluster3855	S	FIG00822167: hypothetical protein	MP_ATCC.CDS.4226	MP36.CDS.1298	MP37.CDS.1358	MP38.CDS.1415	MP1.CDS.1366	MP2.CDS.1363
cluster329	S	FIG00822175: hypothetical protein	MP_ATCC.CDS.313	MP36.CDS.2479	MP37.CDS.2510	MP38.CDS.2588	MP1.CDS.2543	MP2.CDS.2539	mp39.CDS.2504
cluster3345	S	FIG00822175: hypothetical protein	MP_ATCC.CDS.3841	MP36.CDS.4203	MP37.CDS.4214	MP38.CDS.4234	MP1.CDS.4244	MP2.CDS.4255	mp39.CDS.4180
cluster3507	S	FIG00822184: hypothetical protein	MP_ATCC.CDS.4021	MP36.CDS.2086	MP37.CDS.2122	MP38.CDS.2203	MP1.CDS.2150	MP2.CDS.2150	mp39.CDS.2082
cluster3508	S	FIG00822184: hypothetical protein	MP_ATCC.CDS.4022	MP36.CDS.2087	MP37.CDS.2123	MP38.CDS.2204	MP1.CDS.2151	MP2.CDS.2151	mp39.CDS.2083
cluster3272	S	FIG00822190: hypothetical protein	MP_ATCC.CDS.3750	MP36.CDS.3709	MP37.CDS.3739	MP38.CDS.3761	MP1.CDS.3759	MP2.CDS.3120	mp39.CDS.3728
cluster1672	S	FIG00822196: hypothetical protein	MP_ATCC.CDS.1884	MP36.CDS.3505	MP37.CDS.3535	MP38.CDS.3559	MP1.CDS.3556	MP2.CDS.3325	mp39.CDS.3524
cluster2616	S	FIG00822200: hypothetical protein	MP_ATCC.CDS.3006	MP36.CDS.3336	MP37.CDS.3368	MP38.CDS.3396	MP1.CDS.3389	MP2.CDS.3491	mp39.CDS.3357
cluster794	S	FIG00822227: hypothetical protein	MP_ATCC.CDS.855	MP36.CDS.644	MP37.CDS.703	MP38.CDS.701	MP1.CDS.710	MP2.CDS.709	mp39.CDS.647
cluster2226	S	FIG00822237: hypothetical protein	MP_ATCC.CDS.2534	MP36.CDS.116	MP37.CDS.173	MP38.CDS.173	MP1.CDS.181	MP2.CDS.180	mp39.CDS.115
cluster3523	S	FIG00822248: hypothetical protein	MP_ATCC.CDS.4039	MP36.CDS.503	MP37.CDS.564	MP38.CDS.560	MP1.CDS.567	MP2.CDS.564	mp39.CDS.504
cluster1264	S	FIG00822251: hypothetical protein	MP_ATCC.CDS.1392	MP36.CDS.1209	MP37.CDS.1271	MP38.CDS.1328	MP1.CDS.1279	MP2.CDS.1276	mp39.CDS.1217
cluster3801	S	FIG00822256: hypothetical protein	MP_ATCC.CDS.1531	MP36.CDS.20	MP37.CDS.77	MP38.CDS.76	MP1.CDS.86		mp39.CDS.20
cluster2247	S	FIG00822261: hypothetical protein	MP_ATCC.CDS.2558	MP36.CDS.141	MP37.CDS.197	MP38.CDS.197	MP1.CDS.205	MP2.CDS.204	mp39.CDS.138
cluster822	S	FIG00822280: hypothetical protein	MP_ATCC.CDS.885	MP36.CDS.674	MP37.CDS.733	MP38.CDS.731	MP1.CDS.740	MP2.CDS.739	mp39.CDS.677
cluster3612	S	FIG00822289: hypothetical protein	MP_ATCC.CDS.4141	MP36.CDS.402	MP37.CDS.459	MP38.CDS.459	MP1.CDS.466	MP2.CDS.463	mp39.CDS.403
cluster3917	S	FIG00822297: hypothetical protein			MP37.CDS.2753	MP38.CDS.2830	MP1.CDS.2781	MP2.CDS.2776	mp39.CDS.2748
cluster3296	S	FIG00822302: hypothetical protein	MP_ATCC.CDS.3777	MP36.CDS.3682	MP37.CDS.3712	MP38.CDS.3734	MP1.CDS.3731	MP2.CDS.3148	mp39.CDS.3701
cluster5625	S	FIG00822320: hypothetical protein		MP36.CDS.2821
cluster1356	S	FIG00822329: hypothetical protein	MP_ATCC.CDS.1522	MP36.CDS.11	MP37.CDS.67	MP38.CDS.67	MP1.CDS.77	MP2.CDS.76	mp39.CDS.10
cluster1741	S	FIG00822333: hypothetical protein	MP_ATCC.CDS.1958	MP36.CDS.3579	MP37.CDS.3610	MP38.CDS.3632	MP1.CDS.3630	MP2.CDS.3250	mp39.CDS.3598
cluster2177	S	FIG00822335: hypothetical protein	MP_ATCC.CDS.2471	MP36.CDS.2883	MP37.CDS.2916	MP38.CDS.2936	MP1.CDS.2944	MP2.CDS.3947	mp39.CDS.2908
cluster4083	S	FIG00822338: hypothetical protein					MP1.CDS.2696	MP2.CDS.2691
cluster876	S	FIG00822343: hypothetical protein	MP_ATCC.CDS.945	MP36.CDS.734	MP37.CDS.794	MP38.CDS.791	MP1.CDS.801	MP2.CDS.800	mp39.CDS.738
cluster3106	S	FIG00822349: hypothetical protein	MP_ATCC.CDS.3567	MP36.CDS.1040	MP37.CDS.1102	MP38.CDS.1102	MP1.CDS.1110	MP2.CDS.1110	mp39.CDS.1047
cluster2617	S	FIG00822353: hypothetical protein	MP_ATCC.CDS.3007	MP36.CDS.3337	MP37.CDS.3369	MP38.CDS.3397	MP1.CDS.3390	MP2.CDS.3490	mp39.CDS.3358
cluster2176	S	FIG00822363: hypothetical protein	MP_ATCC.CDS.2470	MP36.CDS.2884	MP37.CDS.2917	MP38.CDS.2937	MP1.CDS.2945	MP2.CDS.3946	mp39.CDS.2909
cluster2843	S	FIG00822376: hypothetical protein	MP_ATCC.CDS.3267	MP36.CDS.2273	MP37.CDS.2303	MP38.CDS.2387	MP1.CDS.2337	MP2.CDS.2334	mp39.CDS.2272
cluster3574	S	FIG00822394: hypothetical protein	MP_ATCC.CDS.4095	MP36.CDS.447	MP37.CDS.504	MP38.CDS.503	MP1.CDS.510	MP2.CDS.507	mp39.CDS.448
cluster821	S	FIG00822416: hypothetical protein	MP_ATCC.CDS.884	MP36.CDS.673	MP37.CDS.732	MP38.CDS.730	MP1.CDS.739	MP2.CDS.738	mp39.CDS.676
cluster719	S	FIG00822430: hypothetical protein	MP_ATCC.CDS.770	MP36.CDS.559	MP37.CDS.618	MP38.CDS.615	MP1.CDS.623	MP2.CDS.620	mp39.CDS.560
cluster4061	S	FIG00822441: hypothetical protein			MP37.CDS.1	MP38.CDS.1
cluster2141	S	FIG00822453: hypothetical protein	MP_ATCC.CDS.2422	MP36.CDS.3226	MP37.CDS.3255	MP38.CDS.3283	MP1.CDS.3281	MP2.CDS.3602	mp39.CDS.3241
cluster2485	S	FIG00822458: hypothetical protein	MP_ATCC.CDS.2853	MP36.CDS.1120	MP37.CDS.1186	MP38.CDS.1242	MP1.CDS.1193	MP2.CDS.1191	mp39.CDS.1131
cluster1125	S	FIG00822472: hypothetical protein	MP_ATCC.CDS.1224	MP36.CDS.4134	MP37.CDS.4145	MP38.CDS.4166	MP1.CDS.4177	MP2.CDS.4187	mp39.CDS.4112
cluster2088	S	FIG00822480: hypothetical protein	MP_ATCC.CDS.2352	MP36.CDS.325	MP37.CDS.380	MP38.CDS.381	MP1.CDS.388	MP2.CDS.386	mp39.CDS.324
cluster1661	S	FIG00822481: hypothetical protein	MP_ATCC.CDS.1869	MP36.CDS.2207	MP37.CDS.2239	MP38.CDS.2321	MP1.CDS.2270	MP2.CDS.2269	mp39.CDS.2205
cluster2669	S	FIG00822482: hypothetical protein	MP_ATCC.CDS.3064	MP36.CDS.3396	MP37.CDS.3425	MP38.CDS.3454	MP1.CDS.3447	MP2.CDS.3432	mp39.CDS.3418
cluster928	S	FIG00822485: hypothetical protein	MP_ATCC.CDS.1001	MP36.CDS.789	MP37.CDS.849	MP38.CDS.846	MP1.CDS.856	MP2.CDS.855	mp39.CDS.793
cluster225	S	FIG00822491: hypothetical protein	MP_ATCC.CDS.184	MP36.CDS.3245	MP37.CDS.3275	MP38.CDS.3302	MP1.CDS.3298	MP2.CDS.3584	mp39.CDS.3262
cluster3926	S	FIG00822496: hypothetical protein	MP_ATCC.CDS.1719	MP36.CDS.3151		MP38.CDS.3207		MP2.CDS.3676
cluster2934	S	FIG00822499: hypothetical protein	MP_ATCC.CDS.3372	MP36.CDS.2137	MP37.CDS.2170	MP38.CDS.2252	MP1.CDS.2200	MP2.CDS.2200	mp39.CDS.2131
cluster4404	S	FIG00828045: hypothetical protein	MP_ATCC.CDS.1442
cluster3775	S	FIG00822506: hypothetical protein	MP_ATCC.CDS.746	MP36.CDS.3073	MP37.CDS.3102		MP1.CDS.3130	MP2.CDS.3755	mp39.CDS.3088
cluster521	S	FIG00822513: hypothetical protein	MP_ATCC.CDS.532	MP36.CDS.1933	MP37.CDS.1968	MP38.CDS.2052	MP1.CDS.1994	MP2.CDS.1977	mp39.CDS.1929
cluster4198	S	FIG00822515: hypothetical protein		MP36.CDS.1811
cluster3316	S	FIG00822519: hypothetical protein	MP_ATCC.CDS.3801	MP36.CDS.3657	MP37.CDS.3689	MP38.CDS.3710	MP1.CDS.3708	MP2.CDS.3171	mp39.CDS.3676
cluster1633	S	FIG00822523: hypothetical protein	MP_ATCC.CDS.1835	MP36.CDS.1463	MP37.CDS.1524	MP38.CDS.1584	MP1.CDS.1534	MP2.CDS.1526	mp39.CDS.1473
cluster3652	S	FIG00822543: hypothetical protein	MP_ATCC.CDS.4186	MP36.CDS.1257	MP37.CDS.1317	MP38.CDS.1373	MP1.CDS.1324	MP2.CDS.1322	mp39.CDS.1263
cluster561	S	FIG00822544: hypothetical protein	MP_ATCC.CDS.579	MP36.CDS.3427	MP37.CDS.3456	MP38.CDS.3484	MP1.CDS.3478	MP2.CDS.3402	mp39.CDS.3448
cluster5487	S	FIG00822552: hypothetical protein						MP2.CDS.2356
cluster2206	S	FIG00822555: hypothetical protein	MP_ATCC.CDS.2509	MP36.CDS.90	MP37.CDS.149	MP38.CDS.147	MP1.CDS.157	MP2.CDS.156	mp39.CDS.89
cluster608	S	FIG00822570: hypothetical protein	MP_ATCC.CDS.634	MP36.CDS.2961	MP37.CDS.2991	MP38.CDS.3014	MP1.CDS.3017	MP2.CDS.3868	mp39.CDS.2984
cluster927	S	FIG00822571: hypothetical protein	MP_ATCC.CDS.1000	MP36.CDS.788	MP37.CDS.848	MP38.CDS.845	MP1.CDS.855	MP2.CDS.854	mp39.CDS.792
cluster2993	S	FIG00822577: hypothetical protein	MP_ATCC.CDS.3442	MP36.CDS.913	MP37.CDS.977	MP38.CDS.979	MP1.CDS.982	MP2.CDS.984	mp39.CDS.918
cluster2994	S	FIG00822577: hypothetical protein	MP_ATCC.CDS.3443	MP36.CDS.914	MP37.CDS.978	MP38.CDS.980	MP1.CDS.983	MP2.CDS.985	mp39.CDS.919
cluster1317	S	FIG00822578: hypothetical protein	MP_ATCC.CDS.1470	MP36.CDS.4271	MP37.CDS.16	MP38.CDS.16	MP1.CDS.25	MP2.CDS.25	mp39.CDS.4237
cluster1838	S	FIG00822583: hypothetical protein	MP_ATCC.CDS.2062	MP36.CDS.1745	MP37.CDS.1787	MP38.CDS.1867	MP1.CDS.1809	MP2.CDS.1787	mp39.CDS.1747
cluster169	S	FIG00822594: hypothetical protein	MP_ATCC.CDS.123	MP36.CDS.3918	MP37.CDS.3936	MP38.CDS.3954	MP1.CDS.3968	MP2.CDS.2911	mp39.CDS.3924
cluster158	S	FIG00822596: hypothetical protein	MP_ATCC.CDS.109	MP36.CDS.3906	MP37.CDS.3923	MP38.CDS.3942	MP1.CDS.3955	MP2.CDS.2923	mp39.CDS.3912
cluster761	S	FIG00822603: hypothetical protein	MP_ATCC.CDS.817	MP36.CDS.605	MP37.CDS.664	MP38.CDS.662	MP1.CDS.670	MP2.CDS.668	mp39.CDS.608
cluster2661	S	FIG00822615: hypothetical protein	MP_ATCC.CDS.3054	MP36.CDS.3385	MP37.CDS.3416	MP38.CDS.3445	MP1.CDS.3438	MP2.CDS.3442	mp39.CDS.3408
cluster430	S	FIG00822636: hypothetical protein	MP_ATCC.CDS.427	MP36.CDS.3855	MP37.CDS.3872	MP38.CDS.3891	MP1.CDS.3904	MP2.CDS.2974	mp39.CDS.3860
cluster1099	S	FIG00822637: hypothetical protein	MP_ATCC.CDS.1197	MP36.CDS.4107	MP37.CDS.4118	MP38.CDS.4139	MP1.CDS.4150	MP2.CDS.4160	mp39.CDS.2295
cluster4024	S	FIG00822662: hypothetical protein	MP_ATCC.CDS.298		MP37.CDS.2525
cluster597	S	FIG00822685: hypothetical protein	MP_ATCC.CDS.621	MP36.CDS.2950	MP37.CDS.2980	MP38.CDS.3003	MP1.CDS.3006	MP2.CDS.3879	mp39.CDS.2973
cluster2544	S	FIG00822687: hypothetical protein	MP_ATCC.CDS.2925	MP36.CDS.3736	MP37.CDS.3766	MP38.CDS.3787	MP1.CDS.3785	MP2.CDS.3093	mp39.CDS.3756
cluster1624	S	FIG00822688: hypothetical protein	MP_ATCC.CDS.1826	MP36.CDS.1473	MP37.CDS.1533	MP38.CDS.1593	MP1.CDS.1543	MP2.CDS.1535	mp39.CDS.1482
cluster2401	S	FIG00822708: hypothetical protein	MP_ATCC.CDS.2743	MP36.CDS.1916	MP37.CDS.1952	MP38.CDS.2033	MP1.CDS.1978	MP2.CDS.1959	mp39.CDS.1917
cluster3321	S	FIG00822709: hypothetical protein	MP_ATCC.CDS.3806	MP36.CDS.2752	MP37.CDS.2786	MP38.CDS.2863	MP1.CDS.2814	MP2.CDS.2808	mp39.CDS.2782
cluster4845	S	FIG00822712: hypothetical protein				MP38.CDS.3885
cluster1166	S	FIG00822718: hypothetical protein	MP_ATCC.CDS.1271	MP36.CDS.45	MP37.CDS.102	MP38.CDS.101	MP1.CDS.111	MP2.CDS.111	mp39.CDS.45
cluster798	S	FIG00822720: hypothetical protein	MP_ATCC.CDS.859	MP36.CDS.648	MP37.CDS.707	MP38.CDS.705	MP1.CDS.714	MP2.CDS.713	mp39.CDS.651
cluster1344	S	FIG00822768: hypothetical protein	MP_ATCC.CDS.1498	MP36.CDS.4299	MP37.CDS.44	MP38.CDS.44	MP1.CDS.53	MP2.CDS.53	mp39.CDS.4265
cluster2201	S	FIG00822803: hypothetical protein	MP_ATCC.CDS.2500	MP36.CDS.2574	MP37.CDS.2606	MP38.CDS.2679	MP1.CDS.2634	MP2.CDS.2629	mp39.CDS.2597
cluster687	S	FIG00822807: hypothetical protein	MP_ATCC.CDS.734	MP36.CDS.3060	MP37.CDS.3089	MP38.CDS.3113	MP1.CDS.3117	MP2.CDS.3768	mp39.CDS.3075
cluster1464	S	FIG00822820: hypothetical protein	MP_ATCC.CDS.1648	MP36.CDS.2729	MP37.CDS.2761	MP38.CDS.2838	MP1.CDS.2790	MP2.CDS.2784	mp39.CDS.2757
cluster4067	S	FIG00822825: hypothetical protein			MP37.CDS.2897				mp39.CDS.2889
cluster293	S	FIG00822831: hypothetical protein	MP_ATCC.CDS.269	MP36.CDS.2524	MP37.CDS.2555	MP38.CDS.2630	MP1.CDS.2584	MP2.CDS.2580	mp39.CDS.2546
cluster2070	S	FIG00822836: hypothetical protein	MP_ATCC.CDS.2334	MP36.CDS.343	MP37.CDS.398	MP38.CDS.400	MP1.CDS.406	MP2.CDS.404	mp39.CDS.342
cluster2725	S	FIG00822845: hypothetical protein	MP_ATCC.CDS.3129	MP36.CDS.2814	MP37.CDS.2848	MP38.CDS.1122	MP1.CDS.2878	MP2.CDS.2871	mp39.CDS.2840
cluster1673	S	FIG00822846: hypothetical protein	MP_ATCC.CDS.1885	MP36.CDS.3506	MP37.CDS.3536	MP38.CDS.3560	MP1.CDS.3557	MP2.CDS.3324	mp39.CDS.3525
cluster3866	S	FIG00822853: hypothetical protein		MP36.CDS.1684	MP37.CDS.1727	MP38.CDS.1805	MP1.CDS.1749	MP2.CDS.1725	mp39.CDS.1686
cluster654	S	FIG00822893: hypothetical protein	MP_ATCC.CDS.695	MP36.CDS.3021	MP37.CDS.3051	MP38.CDS.3074	MP1.CDS.3078	MP2.CDS.3807	mp39.CDS.3036
cluster2030	S	FIG00822897: hypothetical protein	MP_ATCC.CDS.2282	MP36.CDS.1621	MP37.CDS.1667	MP38.CDS.1744	MP1.CDS.1688	MP2.CDS.1679	mp39.CDS.1631
cluster1425	S	FIG00822907: hypothetical protein	MP_ATCC.CDS.1601	MP36.CDS.2680	MP37.CDS.2711	MP38.CDS.2788	MP1.CDS.2740	MP2.CDS.2735	mp39.CDS.2705
cluster2529	S	FIG00822908: hypothetical protein	MP_ATCC.CDS.2908	MP36.CDS.1066	MP37.CDS.1131	MP38.CDS.1187	MP1.CDS.1139	MP2.CDS.1138	mp39.CDS.1078
cluster1089	S	FIG00822941: hypothetical protein	MP_ATCC.CDS.1187	MP36.CDS.4097	MP37.CDS.4108	MP38.CDS.4129	MP1.CDS.4140	MP2.CDS.4150	mp39.CDS.4099
cluster38	S	FIG00822946: hypothetical protein	MP_ATCC.CDS.3461;MP_ATCC.CDS.878	MP36.CDS.667;MP36.CDS.933	MP37.CDS.726;MP37.CDS.999	MP38.CDS.724;MP38.CDS.999	MP1.CDS.1003;MP1.CDS.733	MP2.CDS.1004;MP2.CDS.732	mp39.CDS.670;mp39.CDS.939
cluster785	S	FIG00822992: hypothetical protein	MP_ATCC.CDS.844	MP36.CDS.633	MP37.CDS.692	MP38.CDS.690	MP1.CDS.699	MP2.CDS.697	mp39.CDS.636
cluster2668	S	FIG00822995: hypothetical protein	MP_ATCC.CDS.3062	MP36.CDS.3394	MP37.CDS.3423	MP38.CDS.3452	MP1.CDS.3445	MP2.CDS.3434	mp39.CDS.3416
cluster2940	S	FIG00823025: hypothetical protein	MP_ATCC.CDS.3378	MP36.CDS.2131	MP37.CDS.2164	MP38.CDS.2246	MP1.CDS.2194	MP2.CDS.2194	mp39.CDS.2125
cluster2844	S	FIG00823030: hypothetical protein	MP_ATCC.CDS.3269	MP36.CDS.2271
cluster2090	S	FIG00823053: hypothetical protein	MP_ATCC.CDS.2354	MP36.CDS.323	MP37.CDS.378	MP38.CDS.379	MP1.CDS.386	MP2.CDS.384	mp39.CDS.322
cluster3962	S	FIG00823081: hypothetical protein			MP37.CDS.2997	MP38.CDS.3020		MP2.CDS.3862	mp39.CDS.2990
cluster1849	S	FIG00823085: hypothetical protein	MP_ATCC.CDS.2075	MP36.CDS.1758	MP37.CDS.1800	MP38.CDS.1880	MP1.CDS.1822	MP2.CDS.1800	mp39.CDS.1759
cluster1162	S	FIG00823091: hypothetical protein	MP_ATCC.CDS.1267	MP36.CDS.516	MP37.CDS.576	MP38.CDS.573	MP1.CDS.580	MP2.CDS.578	mp39.CDS.517
cluster2167	S	FIG00823111: hypothetical protein	MP_ATCC.CDS.2459	MP36.CDS.2895	MP37.CDS.2928	MP38.CDS.2948	MP1.CDS.2955	MP2.CDS.3933	mp39.CDS.2920
cluster2702	S	FIG00823117: hypothetical protein	MP_ATCC.CDS.3103	MP36.CDS.2840	MP37.CDS.2874	MP38.CDS.1148	MP1.CDS.2904	MP2.CDS.3989	mp39.CDS.2867
cluster3062	S	FIG00823130: hypothetical protein	MP_ATCC.CDS.3519	MP36.CDS.991	MP37.CDS.1055	MP38.CDS.1055	MP1.CDS.1061	MP2.CDS.1061	mp39.CDS.996
cluster3991	S	FIG00823142: hypothetical protein		MP36.CDS.1687			MP1.CDS.1752		mp39.CDS.1689
cluster4000	S	FIG00823154: hypothetical protein		MP36.CDS.3499			MP1.CDS.3550		mp39.CDS.3518
cluster4408	F	Adenylate cyclase (EC 4.6.1.1)	MP_ATCC.CDS.2490
cluster1454	S	FIG00823160: hypothetical protein	MP_ATCC.CDS.1635	MP36.CDS.2714	MP37.CDS.2745	MP38.CDS.2822	MP1.CDS.2773	MP2.CDS.2769	mp39.CDS.2741
cluster3765	S	FIG00823168: hypothetical protein	MP_ATCC.CDS.581	MP36.CDS.3425	MP37.CDS.3454	MP38.CDS.3482	MP1.CDS.3476	MP2.CDS.3404
cluster3909	S	FIG00823201: hypothetical protein		MP36.CDS.1983	MP37.CDS.2020	MP38.CDS.2105		MP2.CDS.2047	mp39.CDS.1983
cluster5863	S	FIG00823203: hypothetical protein					MP1.CDS.2726
cluster1221	S	FIG00823211: hypothetical protein	MP_ATCC.CDS.1344	MP36.CDS.1158	MP37.CDS.1220	MP38.CDS.1278	MP1.CDS.1227	MP2.CDS.1225	mp39.CDS.1166
cluster2823	S	FIG00823214: hypothetical protein	MP_ATCC.CDS.3241	MP36.CDS.2301	MP37.CDS.2332	MP38.CDS.2411	MP1.CDS.2364	MP2.CDS.2362	mp39.CDS.2323
cluster3807	S	FIG00823236: hypothetical protein	MP_ATCC.CDS.1871	MP36.CDS.3492	MP37.CDS.3521	MP38.CDS.3547	MP1.CDS.3543	MP2.CDS.3338
cluster306	S	FIG00823255: hypothetical protein	MP_ATCC.CDS.286	MP36.CDS.2507	MP37.CDS.2537	MP38.CDS.2613	MP1.CDS.2568	MP2.CDS.2564	mp39.CDS.2530
cluster269	S	FIG00823263: hypothetical protein	MP_ATCC.CDS.239	MP36.CDS.2553	MP37.CDS.2584	MP38.CDS.2659	MP1.CDS.2613	MP2.CDS.2609	mp39.CDS.2575
cluster3777	S	FIG00823272: hypothetical protein	MP_ATCC.CDS.1017	MP36.CDS.4329		MP38.CDS.865	MP1.CDS.869	MP2.CDS.869	mp39.CDS.807
cluster5181	S	FIG00823272: hypothetical protein			MP37.CDS.863
cluster1998	S	FIG00823285: hypothetical protein	MP_ATCC.CDS.2244	MP36.CDS.2097	MP37.CDS.2132	MP38.CDS.2213	MP1.CDS.2161	MP2.CDS.2160	mp39.CDS.2093
cluster1170	S	FIG00823318: hypothetical protein	MP_ATCC.CDS.1275	MP36.CDS.49	MP37.CDS.106	MP38.CDS.105	MP1.CDS.115	MP2.CDS.115	mp39.CDS.49
cluster1533	S	FIG00823326: hypothetical protein	MP_ATCC.CDS.1722	MP36.CDS.3148	MP37.CDS.3177	MP38.CDS.3204	MP1.CDS.3205	MP2.CDS.3679	mp39.CDS.3163
cluster2210	S	FIG00823331: hypothetical protein	MP_ATCC.CDS.2515	MP36.CDS.96	MP37.CDS.155	MP38.CDS.153	MP1.CDS.163	MP2.CDS.162	mp39.CDS.95
cluster2638	S	FIG00823332: hypothetical protein	MP_ATCC.CDS.3030	MP36.CDS.3360	MP37.CDS.3390	MP38.CDS.3420	MP1.CDS.3413	MP2.CDS.3467	mp39.CDS.3382
cluster1682	S	FIG00823358: hypothetical protein	MP_ATCC.CDS.1896	MP36.CDS.3516	MP37.CDS.3546	MP38.CDS.3570	MP1.CDS.3568	MP2.CDS.3313	mp39.CDS.3535
cluster3835	S	FIG00823369: hypothetical protein	MP_ATCC.CDS.3026	MP36.CDS.3356		MP38.CDS.3416	MP1.CDS.3409	MP2.CDS.3471	mp39.CDS.3378
cluster3080	S	FIG00823384: hypothetical protein	MP_ATCC.CDS.3537	MP36.CDS.1009	MP37.CDS.1073	MP38.CDS.1073	MP1.CDS.1079	MP2.CDS.1079	mp39.CDS.1015
cluster3491	S	FIG00823385: hypothetical protein	MP_ATCC.CDS.4003	MP36.CDS.2067	MP37.CDS.2103	MP38.CDS.2185	MP1.CDS.2132	MP2.CDS.2130	mp39.CDS.2062
cluster5532	S	FIG00823395: hypothetical protein							mp39.CDS.2294
cluster1414	S	FIG00823410: hypothetical protein	MP_ATCC.CDS.1588	MP36.CDS.2667	MP37.CDS.2699	MP38.CDS.2775	MP1.CDS.2727	MP2.CDS.2722	mp39.CDS.2692
cluster3804	S	FIG00823410: hypothetical protein	MP_ATCC.CDS.1718	MP36.CDS.3152	MP37.CDS.3181	MP38.CDS.3208	MP1.CDS.3209	MP2.CDS.3675
cluster2991	S	FIG00823411: hypothetical protein	MP_ATCC.CDS.3440	MP36.CDS.911	MP37.CDS.975	MP38.CDS.977	MP1.CDS.980	MP2.CDS.982	mp39.CDS.916
cluster235	S	FIG00823439: hypothetical protein	MP_ATCC.CDS.197	MP36.CDS.2201	MP37.CDS.2233	MP38.CDS.2315	MP1.CDS.2264	MP2.CDS.2263	mp39.CDS.2199
cluster2926	S	FIG00823469: hypothetical protein	MP_ATCC.CDS.3363	MP36.CDS.2147	MP37.CDS.2179	MP38.CDS.2261	MP1.CDS.2210	MP2.CDS.2210	mp39.CDS.2140
cluster3159	S	FIG00823516: hypothetical protein	MP_ATCC.CDS.3626	MP36.CDS.1400	MP37.CDS.1463	MP38.CDS.1522	MP1.CDS.1471	MP2.CDS.1466	mp39.CDS.1410
cluster2846	S	FIG00823547: hypothetical protein	MP_ATCC.CDS.3271	MP36.CDS.2269	MP37.CDS.2299	MP38.CDS.2383	MP1.CDS.2333	MP2.CDS.2330	mp39.CDS.2268
cluster2913	S	FIG00823549: hypothetical protein	MP_ATCC.CDS.3349	MP36.CDS.2162	MP37.CDS.2193	MP38.CDS.2275	MP1.CDS.2225	MP2.CDS.2224	mp39.CDS.2154
cluster4409	S	Serine acetyltransferase (EC 2.3.1.30)	MP_ATCC.CDS.2491
cluster693	S	FIG00823567: hypothetical protein	MP_ATCC.CDS.741	MP36.CDS.3067	MP37.CDS.3096	MP38.CDS.3120	MP1.CDS.3124	MP2.CDS.3761	mp39.CDS.3082
cluster3881	S	FIG00823598: hypothetical protein	MP_ATCC.CDS.920	MP36.CDS.709		MP38.CDS.766	MP1.CDS.775		mp39.CDS.712
cluster1708	S	FIG00823618: hypothetical protein	MP_ATCC.CDS.1923	MP36.CDS.3544	MP37.CDS.3575	MP38.CDS.3597	MP1.CDS.3595	MP2.CDS.3285	mp39.CDS.3563
cluster3869	S	FIG00823619: hypothetical protein		MP36.CDS.2193	MP37.CDS.2225	MP38.CDS.2307	MP1.CDS.2257	MP2.CDS.2256	mp39.CDS.2186
cluster1286	S	FIG00823635: hypothetical protein	MP_ATCC.CDS.1420	MP36.CDS.1236	MP37.CDS.1298	MP38.CDS.1353	MP1.CDS.1305	MP2.CDS.1303	mp39.CDS.1244
cluster2228	S	FIG00823664: hypothetical protein	MP_ATCC.CDS.2536	MP36.CDS.118	MP37.CDS.175	MP38.CDS.175	MP1.CDS.183	MP2.CDS.182	mp39.CDS.117
cluster4058	S	FIG00823676: hypothetical protein		MP36.CDS.3989	MP37.CDS.4004
cluster4419	S	PE family protein	MP_ATCC.CDS.204
cluster3534	S	FIG00823681: hypothetical protein	MP_ATCC.CDS.4050	MP36.CDS.492	MP37.CDS.552	MP38.CDS.548	MP1.CDS.555	MP2.CDS.552	mp39.CDS.493
cluster440	S	FIG00823750: hypothetical protein	MP_ATCC.CDS.439	MP36.CDS.2654	MP37.CDS.2684	MP38.CDS.2761	MP1.CDS.2714	MP2.CDS.2709	mp39.CDS.2677
cluster5143	S	FIG00823768: hypothetical protein			MP37.CDS.983
cluster2543	S	FIG00823785: hypothetical protein	MP_ATCC.CDS.2924	MP36.CDS.3735	MP37.CDS.3765	MP38.CDS.3786	MP1.CDS.3784	MP2.CDS.3094	mp39.CDS.3755
cluster758	S	FIG00823799: hypothetical protein	MP_ATCC.CDS.813	MP36.CDS.601	MP37.CDS.660	MP38.CDS.658	MP1.CDS.666	MP2.CDS.664	mp39.CDS.604
cluster3880	S	FIG00823823: hypothetical protein	MP_ATCC.CDS.710		MP37.CDS.3065	MP38.CDS.3089	MP1.CDS.3093	MP2.CDS.3792
cluster1810	S	FIG00823839: hypothetical protein	MP_ATCC.CDS.2033	MP36.CDS.3653	MP37.CDS.3685	MP38.CDS.3706	MP1.CDS.3704	MP2.CDS.3175	mp39.CDS.3672
cluster3427	S	FIG00823852: hypothetical protein	MP_ATCC.CDS.3933	MP36.CDS.1993	MP37.CDS.2030	MP38.CDS.2115	MP1.CDS.2059	MP2.CDS.2057	mp39.CDS.1993
cluster3939	S	FIG00823878: hypothetical protein	MP_ATCC.CDS.3414		MP37.CDS.949	MP38.CDS.4302			mp39.CDS.4283
cluster4051	S	FIG00823890: hypothetical protein		MP36.CDS.2525				MP2.CDS.2581
cluster1273	S	FIG00823918: hypothetical protein	MP_ATCC.CDS.1403	MP36.CDS.1220	MP37.CDS.1281	MP38.CDS.1337	MP1.CDS.1289	MP2.CDS.1287	mp39.CDS.1227
cluster3812	S	FIG00823939: hypothetical protein	MP_ATCC.CDS.2213	MP36.CDS.1902		MP38.CDS.2020	MP1.CDS.1964	MP2.CDS.1942	mp39.CDS.1902
cluster3767	S	FIG00823950: hypothetical protein	MP_ATCC.CDS.673	MP36.CDS.2999	MP37.CDS.3029	MP38.CDS.3052	MP1.CDS.3056	MP2.CDS.3829
cluster2178	S	FIG00823991: hypothetical protein	MP_ATCC.CDS.2472	MP36.CDS.2882	MP37.CDS.2915	MP38.CDS.2935	MP1.CDS.2943	MP2.CDS.3948	mp39.CDS.2907
cluster1857	S	FIG00824005: hypothetical protein	MP_ATCC.CDS.2085	MP36.CDS.1767	MP37.CDS.1808	MP38.CDS.1889	MP1.CDS.1831	MP2.CDS.1809	mp39.CDS.1768
cluster3914	S	FIG00824120: hypothetical protein			MP37.CDS.1502	MP38.CDS.1562	MP1.CDS.1512	MP2.CDS.1504	mp39.CDS.1451
cluster1161	S	FIG00824158: hypothetical protein	MP_ATCC.CDS.1266	MP36.CDS.517	MP37.CDS.577	MP38.CDS.574	MP1.CDS.581	MP2.CDS.579	mp39.CDS.518
cluster5852	S	FIG00824158: hypothetical protein							mp39.CDS.519
cluster997	S	FIG00824171: hypothetical protein	MP_ATCC.CDS.1082	MP36.CDS.3988	MP37.CDS.4003	MP38.CDS.4022	MP1.CDS.4033	MP2.CDS.4043	mp39.CDS.3994
cluster3949	S	FIG00824201: hypothetical protein		MP36.CDS.3333	MP37.CDS.3365	MP38.CDS.3392			mp39.CDS.3354
cluster3653	S	FIG00824206: hypothetical protein	MP_ATCC.CDS.4188	MP36.CDS.1259	MP37.CDS.1319	MP38.CDS.1375	MP1.CDS.1326	MP2.CDS.1324	mp39.CDS.1265
cluster5193	S	FIG00824206: hypothetical protein					MP1.CDS.1327
cluster407	S	FIG00824215: hypothetical protein	MP_ATCC.CDS.398	MP36.CDS.2392	MP37.CDS.2423	MP38.CDS.2502	MP1.CDS.2456	MP2.CDS.2453	mp39.CDS.2416
cluster3632	S	FIG00824223: hypothetical protein	MP_ATCC.CDS.4165	MP36.CDS.379	MP37.CDS.435	MP38.CDS.436	MP1.CDS.443	MP2.CDS.440	mp39.CDS.379
cluster1466	S	FIG00824247: hypothetical protein	MP_ATCC.CDS.1650	MP36.CDS.2731	MP37.CDS.2763	MP38.CDS.2840	MP1.CDS.2792	MP2.CDS.2786	mp39.CDS.2759
cluster2919	S	FIG00824259: hypothetical protein	MP_ATCC.CDS.3355	MP36.CDS.2156	MP37.CDS.2187	MP38.CDS.2269	MP1.CDS.2219	MP2.CDS.2218	mp39.CDS.2148
cluster3972	S	FIG00824260: hypothetical protein	MP_ATCC.CDS.2538				MP1.CDS.185	MP2.CDS.184
cluster3936	S	FIG00824274: hypothetical protein	MP_ATCC.CDS.2963	MP36.CDS.3787	MP37.CDS.3805		MP1.CDS.3836
cluster4838	S	FIG00824276: hypothetical protein						MP2.CDS.4265
cluster4940	S	FIG00824276: hypothetical protein				MP38.CDS.4244
cluster2478	S	FIG00824301: hypothetical protein	MP_ATCC.CDS.2846	MP36.CDS.1488	MP37.CDS.1547	MP38.CDS.1617	MP1.CDS.1558	MP2.CDS.1550	mp39.CDS.1497
cluster2749	S	FIG00824306: hypothetical protein	MP_ATCC.CDS.3159	MP36.CDS.2784	MP37.CDS.2818	MP38.CDS.2896	MP1.CDS.2847	MP2.CDS.2840	mp39.CDS.2814
cluster364	S	FIG00824339: hypothetical protein	MP_ATCC.CDS.352	MP36.CDS.2439	MP37.CDS.2469	MP38.CDS.2549	MP1.CDS.2503	MP2.CDS.2499	mp39.CDS.2464
cluster914	S	FIG00824343: hypothetical protein	MP_ATCC.CDS.986	MP36.CDS.774	MP37.CDS.834	MP38.CDS.831	MP1.CDS.841	MP2.CDS.840	mp39.CDS.778
cluster3965	S	FIG00824482: hypothetical protein	MP_ATCC.CDS.302		MP37.CDS.2521				mp39.CDS.2515
cluster4878	S	FIG00824586: hypothetical protein		MP36.CDS.3534
cluster2484	S	FIG00824608: hypothetical protein	MP_ATCC.CDS.2852	MP36.CDS.1121	MP37.CDS.1187	MP38.CDS.1243	MP1.CDS.1194	MP2.CDS.1192	mp39.CDS.1132
cluster2407	S	FIG00824621: hypothetical protein	MP_ATCC.CDS.2766	MP36.CDS.1566	MP37.CDS.1625	MP38.CDS.1695	MP1.CDS.1637	MP2.CDS.1646	mp39.CDS.1577
cluster1893	S	FIG00824646: hypothetical protein	MP_ATCC.CDS.2130	MP36.CDS.1815	MP37.CDS.1852	MP38.CDS.1933	MP1.CDS.1877	MP2.CDS.1854	mp39.CDS.1816
cluster3980	S	FIG00824650: hypothetical protein	MP_ATCC.CDS.3468				MP1.CDS.1010	MP2.CDS.1011
cluster1112	S	FIG00824660: hypothetical protein	MP_ATCC.CDS.1210	MP36.CDS.4120	MP37.CDS.4131	MP38.CDS.4152	MP1.CDS.4163	MP2.CDS.4173	mp39.CDS.2308
cluster3907	S	FIG00824664: hypothetical protein		MP36.CDS.1348		MP38.CDS.1468	MP1.CDS.1418	MP2.CDS.1414	mp39.CDS.1355
cluster1117	S	FIG00824690: hypothetical protein	MP_ATCC.CDS.1215	MP36.CDS.4125	MP37.CDS.4136	MP38.CDS.4157	MP1.CDS.4168	MP2.CDS.4178	mp39.CDS.2313
cluster3791	S	FIG00824716: hypothetical protein	MP_ATCC.CDS.1463	MP36.CDS.4264	MP37.CDS.9	MP38.CDS.9	MP1.CDS.18	MP2.CDS.18
cluster157	S	FIG00824752: hypothetical protein	MP_ATCC.CDS.108	MP36.CDS.3905	MP37.CDS.3922	MP38.CDS.3941	MP1.CDS.3954	MP2.CDS.2924	mp39.CDS.3911
cluster4424	S	FIG00824772: hypothetical protein			MP37.CDS.3449
cluster4075	S	FIG00824777: hypothetical protein				MP38.CDS.962			mp39.CDS.901
cluster3910	S	FIG00824784: hypothetical protein		MP36.CDS.2671		MP38.CDS.2779	MP1.CDS.2731	MP2.CDS.2726	mp39.CDS.2696
cluster3810	S	FIG00824830: hypothetical protein	MP_ATCC.CDS.2066	MP36.CDS.1749	MP37.CDS.1791	MP38.CDS.1871	MP1.CDS.1813	MP2.CDS.1791
cluster3276	S	FIG00824965: hypothetical protein	MP_ATCC.CDS.3755	MP36.CDS.3704	MP37.CDS.3734	MP38.CDS.3756	MP1.CDS.3754	MP2.CDS.3125	mp39.CDS.3723
cluster795	S	FIG00825015: hypothetical protein	MP_ATCC.CDS.856	MP36.CDS.645	MP37.CDS.704	MP38.CDS.702	MP1.CDS.711	MP2.CDS.710	mp39.CDS.648
cluster1284	S	FIG00825033: hypothetical protein	MP_ATCC.CDS.1418	MP36.CDS.1234	MP37.CDS.1296	MP38.CDS.1351	MP1.CDS.1303	MP2.CDS.1301	mp39.CDS.1242
cluster3893	S	FIG00825039: hypothetical protein	MP_ATCC.CDS.2757	MP36.CDS.1575		MP38.CDS.1704	MP1.CDS.1647		mp39.CDS.1587
cluster3829	S	FIG00825050: hypothetical protein	MP_ATCC.CDS.2884		MP37.CDS.1154	MP38.CDS.1211	MP1.CDS.1162	MP2.CDS.1160	mp39.CDS.1100
cluster2012	S	FIG00825058: hypothetical protein	MP_ATCC.CDS.2261	MP36.CDS.3476	MP37.CDS.3505	MP38.CDS.3531	MP1.CDS.3526	MP2.CDS.3354	mp39.CDS.3496
cluster2561	S	FIG00825126: hypothetical protein	MP_ATCC.CDS.2944	MP36.CDS.3767	MP37.CDS.3786	MP38.CDS.3817	MP1.CDS.3817	MP2.CDS.3063	mp39.CDS.3774
cluster2680	S	FIG00825170: hypothetical protein	MP_ATCC.CDS.3077	MP36.CDS.3081	MP37.CDS.3111	MP38.CDS.3134	MP1.CDS.3139	MP2.CDS.3746	mp39.CDS.3096
cluster3911	S	FIG00825170: hypothetical protein		MP36.CDS.3083	MP37.CDS.3112	MP38.CDS.3137	MP1.CDS.3141	MP2.CDS.3744
cluster3948	S	FIG00825170: hypothetical protein		MP36.CDS.3082		MP38.CDS.3135	MP1.CDS.3140	MP2.CDS.3745
cluster4621	S	FIG00825170: hypothetical protein				MP38.CDS.3136
cluster769	S	FIG00825218: hypothetical protein	MP_ATCC.CDS.825	MP36.CDS.613	MP37.CDS.673	MP38.CDS.671	MP1.CDS.679	MP2.CDS.677	mp39.CDS.617
cluster3935	S	FIG00825223: hypothetical protein	MP_ATCC.CDS.2881		MP37.CDS.1157		MP1.CDS.1165	MP2.CDS.1163
cluster4168	S	FIG00825223: hypothetical protein				MP38.CDS.1214
cluster5325	S	FIG00825223: hypothetical protein							mp39.CDS.1103
cluster4432	S	PE-PGRS virulence associated protein	MP_ATCC.CDS.3731
cluster3978	S	FIG00825530: hypothetical protein	MP_ATCC.CDS.3138	MP36.CDS.2805	MP37.CDS.2839
cluster3564	S	FIG00825576: hypothetical protein	MP_ATCC.CDS.4084	MP36.CDS.458	MP37.CDS.516	MP38.CDS.514	MP1.CDS.521	MP2.CDS.518	mp39.CDS.459
cluster3921	S	FIG00825588: hypothetical protein	MP_ATCC.CDS.413	MP36.CDS.2377			MP1.CDS.2441	MP2.CDS.2438
cluster2404	S	FIG00825647: hypothetical protein	MP_ATCC.CDS.2746	MP36.CDS.1919	MP37.CDS.1955	MP38.CDS.2036	MP1.CDS.1981	MP2.CDS.1962	mp39.CDS.1920
cluster3325	S	FIG00825706: hypothetical protein	MP_ATCC.CDS.3813	MP36.CDS.4225	MP37.CDS.4237	MP38.CDS.4257	MP1.CDS.4266	MP2.CDS.4278	mp39.CDS.4203
cluster2357	S	FIG00825710: hypothetical protein	MP_ATCC.CDS.2681	MP36.CDS.267	MP37.CDS.319	MP38.CDS.321	MP1.CDS.328	MP2.CDS.327	mp39.CDS.263
cluster812	S	FIG00825799: hypothetical protein	MP_ATCC.CDS.874	MP36.CDS.663	MP37.CDS.722	MP38.CDS.720	MP1.CDS.729	MP2.CDS.728	mp39.CDS.666
cluster2763	S	FIG00825978: hypothetical protein	MP_ATCC.CDS.3174	MP36.CDS.2769	MP37.CDS.2803	MP38.CDS.2881	MP1.CDS.2832	MP2.CDS.2825	mp39.CDS.2799
cluster3955	S	FIG00826069: hypothetical protein		MP36.CDS.3759		MP38.CDS.3810	MP1.CDS.3810	MP2.CDS.3070
cluster3895	S	FIG00826141: hypothetical protein	MP_ATCC.CDS.3082	MP36.CDS.2861	MP37.CDS.2895	MP38.CDS.1169		MP2.CDS.3968
cluster373	S	FIG00826184: hypothetical protein	MP_ATCC.CDS.362	MP36.CDS.2429	MP37.CDS.2459	MP38.CDS.2539	MP1.CDS.2493	MP2.CDS.2489	mp39.CDS.2454
cluster3916	S	FIG00826238: hypothetical protein			MP37.CDS.2676	MP38.CDS.2753	MP1.CDS.2706	MP2.CDS.2701	mp39.CDS.2669
cluster4847	S	FIG00826238: hypothetical protein				MP38.CDS.2754
cluster5388	S	FIG00826238: hypothetical protein		MP36.CDS.2647
cluster5742	S	FIG00826238: hypothetical protein							mp39.CDS.2670
cluster3827	S	FIG00826553: hypothetical protein	MP_ATCC.CDS.2770		MP37.CDS.1622	MP38.CDS.1692	MP1.CDS.1634	MP2.CDS.1626	mp39.CDS.1574
cluster1287	S	FIG00826554: hypothetical protein	MP_ATCC.CDS.1421	MP36.CDS.1237	MP37.CDS.1299	MP38.CDS.1354	MP1.CDS.1306	MP2.CDS.1304	mp39.CDS.1245
cluster3229	S	FIG00826611: hypothetical protein	MP_ATCC.CDS.3702	MP36.CDS.1323	MP37.CDS.1385	MP38.CDS.1443	MP1.CDS.1393	MP2.CDS.1389	mp39.CDS.1330
cluster3050	S	FIG00826613: hypothetical protein	MP_ATCC.CDS.3506	MP36.CDS.977	MP37.CDS.1042	MP38.CDS.1042	MP1.CDS.1048	MP2.CDS.1049	mp39.CDS.982
cluster3808	S	FIG00826712: hypothetical protein	MP_ATCC.CDS.1880	MP36.CDS.3501	MP37.CDS.3531		MP1.CDS.3552	MP2.CDS.3329	mp39.CDS.3520
cluster4017	S	FIG00826886: hypothetical protein				MP38.CDS.2162	MP1.CDS.2109	MP2.CDS.2107
cluster1992	S	FIG00827133: hypothetical protein	MP_ATCC.CDS.2238	MP36.CDS.2103	MP37.CDS.2138	MP38.CDS.2219	MP1.CDS.2167	MP2.CDS.2166	mp39.CDS.2099
cluster4036	S	FIG00827380: hypothetical protein	MP_ATCC.CDS.3003			MP38.CDS.3393
cluster2917	S	FIG00827381: hypothetical protein	MP_ATCC.CDS.3353	MP36.CDS.2158	MP37.CDS.2189	MP38.CDS.2271	MP1.CDS.2221	MP2.CDS.2220	mp39.CDS.2150
cluster5243	S	FIG00827589: hypothetical protein							mp39.CDS.3245
cluster2322	S	FIG00827605: hypothetical protein	MP_ATCC.CDS.2645	MP36.CDS.229	MP37.CDS.282	MP38.CDS.284	MP1.CDS.290	MP2.CDS.290	mp39.CDS.225
cluster4446	K	Methylated-DNA--protein-cysteine methyltransferase (EC 2.1.1.63)	MP_ATCC.CDS.1108
cluster3856	S	FIG00828285: hypothetical protein	MP_ATCC.CDS.4231		MP37.CDS.3438	MP38.CDS.3467	MP1.CDS.3460	MP2.CDS.3419	mp39.CDS.3432
cluster926	S	FIG00828360: hypothetical protein	MP_ATCC.CDS.999	MP36.CDS.787	MP37.CDS.847	MP38.CDS.844	MP1.CDS.854	MP2.CDS.853	mp39.CDS.791
cluster3809	S	FIG00828439: hypothetical protein	MP_ATCC.CDS.2031		MP37.CDS.3683	MP38.CDS.3704	MP1.CDS.3702	MP2.CDS.3177	mp39.CDS.3670
cluster3976	S	FIG00828468: hypothetical protein	MP_ATCC.CDS.3002				MP1.CDS.3386	MP2.CDS.3494
cluster3904	S	FIG00828492: hypothetical protein	MP_ATCC.CDS.4129	MP36.CDS.413	MP37.CDS.470	MP38.CDS.470			mp39.CDS.414
cluster5677	S	FIG00828509: hypothetical protein							mp39.CDS.15
cluster3894	S	FIG00828683: hypothetical protein	MP_ATCC.CDS.2827		MP37.CDS.1566	MP38.CDS.1636		MP2.CDS.1569	mp39.CDS.1516
cluster3305	S	FIG00828696: hypothetical protein	MP_ATCC.CDS.3790	MP36.CDS.3668	MP37.CDS.3700	MP38.CDS.3721	MP1.CDS.3719	MP2.CDS.3160	mp39.CDS.3687
cluster1662	S	FIG00828812: hypothetical protein	MP_ATCC.CDS.1870	MP36.CDS.2206	MP37.CDS.2238	MP38.CDS.2320	MP1.CDS.2269	MP2.CDS.2268	mp39.CDS.2204
cluster10	S	FIG00829478: hypothetical protein	MP_ATCC.CDS.1242;MP_ATCC.CDS.1406;MP_ATCC.CDS.2155	MP36.CDS.1223;MP36.CDS.1841;MP36.CDS.2126	MP37.CDS.2160;MP37.CDS.1284;MP37.CDS.1878	MP38.CDS.1340;MP38.CDS.1959;MP38.CDS.2241	MP1.CDS.1292;MP1.CDS.1903;MP1.CDS.4300	MP2.CDS.1290;MP2.CDS.1880;MP2.CDS.2189	mp39.CDS.4294;mp39.CDS.1230;mp39.CDS.1842
cluster5215	S	FIG00829549: hypothetical protein			MP37.CDS.2542
cluster585	S	FIG00829758: hypothetical protein	MP_ATCC.CDS.607	MP36.CDS.2936	MP37.CDS.2966	MP38.CDS.2989	MP1.CDS.2992	MP2.CDS.3893	mp39.CDS.2959
cluster3982	S	FIG00830002: hypothetical protein		MP36.CDS.4		MP38.CDS.60	MP1.CDS.70
cluster2227	S	FIG00830361: hypothetical protein	MP_ATCC.CDS.2535	MP36.CDS.117	MP37.CDS.174	MP38.CDS.174	MP1.CDS.182	MP2.CDS.181	mp39.CDS.116
cluster1964	S	FIG00830366: hypothetical protein	MP_ATCC.CDS.2205	MP36.CDS.1893	MP37.CDS.1930	MP38.CDS.2011	MP1.CDS.1955	MP2.CDS.1934	mp39.CDS.1894
cluster2938	S	FIG00830660: hypothetical protein	MP_ATCC.CDS.3376	MP36.CDS.2133	MP37.CDS.2166	MP38.CDS.2248	MP1.CDS.2196	MP2.CDS.2196	mp39.CDS.2127
cluster3995	S	FIG00831360: hypothetical protein		MP36.CDS.2141			MP1.CDS.2204	MP2.CDS.2204
cluster1628	S	FIG00831546: hypothetical protein	MP_ATCC.CDS.1830	MP36.CDS.1469	MP37.CDS.1529	MP38.CDS.1589	MP1.CDS.1539	MP2.CDS.1531	mp39.CDS.1478
cluster4293	S	FIG00831612: hypothetical protein				MP38.CDS.1839
cluster5451	S	FIG00831633: hypothetical protein							mp39.CDS.1717
cluster4809	S	FIG00831710: hypothetical protein							mp39.CDS.3010
cluster566	S	FIG00832125: hypothetical protein	MP_ATCC.CDS.587	MP36.CDS.3418	MP37.CDS.3447	MP38.CDS.3475	MP1.CDS.3469	MP2.CDS.3410	mp39.CDS.3441
cluster1319	S	FIG00832379: hypothetical protein	MP_ATCC.CDS.1472	MP36.CDS.4273	MP37.CDS.18	MP38.CDS.18	MP1.CDS.27	MP2.CDS.27	mp39.CDS.4239
cluster2405	S	FIG00832781: hypothetical protein	MP_ATCC.CDS.2747	MP36.CDS.1920	MP37.CDS.1956	MP38.CDS.2037	MP1.CDS.1982	MP2.CDS.1963	mp39.CDS.1921
cluster3968	S	FIG00833008: hypothetical protein	MP_ATCC.CDS.918			MP38.CDS.764			mp39.CDS.710
cluster4050	S	FIG00833049: hypothetical protein		MP36.CDS.2515	MP37.CDS.2546
cluster3726	M	FIG008913: Membrane-associated phospholipid phosphatase	MP_ATCC.CDS.4271	MP36.CDS.4161	MP37.CDS.4172	MP38.CDS.4193	MP1.CDS.4203	MP2.CDS.4213	mp39.CDS.4138
cluster2699	S	FIG00993990: hypothetical protein	MP_ATCC.CDS.3100	MP36.CDS.2843	MP37.CDS.2877	MP38.CDS.1151	MP1.CDS.2907	MP2.CDS.3986	mp39.CDS.2870
cluster614	S	FIG00994994: hypothetical protein	MP_ATCC.CDS.641	MP36.CDS.2967	MP37.CDS.2998	MP38.CDS.3021	MP1.CDS.3023	MP2.CDS.3861	mp39.CDS.2991
cluster2861	S	FIG00995176: hypothetical protein	MP_ATCC.CDS.3286	MP36.CDS.2254	MP37.CDS.2284	MP38.CDS.2368	MP1.CDS.2318	MP2.CDS.2315	mp39.CDS.2253
cluster999	S	FIG00995606: hypothetical protein	MP_ATCC.CDS.1085	MP36.CDS.3992	MP37.CDS.4006	MP38.CDS.4026	MP1.CDS.4037	MP2.CDS.4047	mp39.CDS.3997
cluster1760	S	FIG00995613: hypothetical protein	MP_ATCC.CDS.1978	MP36.CDS.3600	MP37.CDS.3630	MP38.CDS.3652	MP1.CDS.3650	MP2.CDS.3229	mp39.CDS.3618
cluster2006	S	FIG00995849: hypothetical protein	MP_ATCC.CDS.2255	MP36.CDS.3470	MP37.CDS.3499	MP38.CDS.3525	MP1.CDS.3520	MP2.CDS.3360	mp39.CDS.3490
cluster2551	S	FIG00996157: hypothetical protein	MP_ATCC.CDS.2932	MP36.CDS.3743	MP37.CDS.3773	MP38.CDS.3794	MP1.CDS.3793	MP2.CDS.3086	mp39.CDS.3763
cluster69	S	FIG00996932: hypothetical protein	MP_ATCC.CDS.3941	MP36.CDS.2002	MP37.CDS.2038;MP37.CDS.2039	MP38.CDS.2122	MP1.CDS.2066	MP2.CDS.2065	mp39.CDS.2000
cluster2005	S	FIG00997183: hypothetical protein	MP_ATCC.CDS.2254	MP36.CDS.3469	MP37.CDS.3498	MP38.CDS.3524	MP1.CDS.3519	MP2.CDS.3361	mp39.CDS.3489
cluster2549	S	FIG00997706: hypothetical protein	MP_ATCC.CDS.2930	MP36.CDS.3741	MP37.CDS.3771	MP38.CDS.3792	MP1.CDS.3791	MP2.CDS.3088	mp39.CDS.3761
cluster259	S	FIG00997866: hypothetical protein	MP_ATCC.CDS.229	MP36.CDS.3204	MP37.CDS.3233	MP38.CDS.3261	MP1.CDS.3261	MP2.CDS.3622	mp39.CDS.3218
cluster4459	G	Glucose/sorbosone dehydrogenase, lipoprotein LppZ	MP_ATCC.CDS.3868
cluster612	S	FIG00999418: hypothetical protein	MP_ATCC.CDS.638	MP36.CDS.2965	MP37.CDS.2995	MP38.CDS.3018	MP1.CDS.3021	MP2.CDS.3864	mp39.CDS.2988
cluster1000	S	FIG00999563: hypothetical protein	MP_ATCC.CDS.1086	MP36.CDS.3993	MP37.CDS.4007	MP38.CDS.4027	MP1.CDS.4038	MP2.CDS.4048	mp39.CDS.3998
cluster128	I	FIG00999917: Enoyl-CoA hydratase	MP_ATCC.CDS.79	MP36.CDS.3876	MP37.CDS.3893	MP38.CDS.3912	MP1.CDS.3925	MP2.CDS.2953	mp39.CDS.3881
cluster1328	S	FIG00999975: hypothetical protein	MP_ATCC.CDS.1481	MP36.CDS.4282	MP37.CDS.27	MP38.CDS.27	MP1.CDS.36	MP2.CDS.36	mp39.CDS.4248
cluster1024	S	FIG011121: hypothetical protein	MP_ATCC.CDS.1113	MP36.CDS.4020	MP37.CDS.4034	MP38.CDS.4053	MP1.CDS.4064	MP2.CDS.4073	mp39.CDS.4023
cluster3287	S	FIG01121836: hypothetical protein	MP_ATCC.CDS.3768	MP36.CDS.3691	MP37.CDS.3721	MP38.CDS.3743	MP1.CDS.3740	MP2.CDS.3139	mp39.CDS.3710
cluster1375	M	FIG01121868: Possible membrane protein	MP_ATCC.CDS.1543	MP36.CDS.32	MP37.CDS.89	MP38.CDS.88	MP1.CDS.98	MP2.CDS.98	mp39.CDS.32
cluster21	M	FIG01121868: Possible membrane protein	MP_ATCC.CDS.1607;MP_ATCC.CDS.2435	MP36.CDS.2686;MP36.CDS.3240	MP37.CDS.2717;MP37.CDS.3269	MP38.CDS.2794;MP38.CDS.3297	MP1.CDS.2746;MP1.CDS.3293	MP2.CDS.2741;MP2.CDS.3589	mp39.CDS.2711;mp39.CDS.3256
cluster2302	M	FIG01121868: Possible membrane protein, Rv0200	MP_ATCC.CDS.2623	MP36.CDS.208	MP37.CDS.261	MP38.CDS.262	MP1.CDS.269	MP2.CDS.269	mp39.CDS.204
cluster2306	M	FIG01121868: Possible membrane protein, Rv0205	MP_ATCC.CDS.2629	MP36.CDS.213	MP37.CDS.266	MP38.CDS.268	MP1.CDS.274	MP2.CDS.274	mp39.CDS.209
cluster2922	S	FIG01121868: secreted protein	MP_ATCC.CDS.3359	MP36.CDS.2152	MP37.CDS.2183	MP38.CDS.2265	MP1.CDS.2215	MP2.CDS.2214	mp39.CDS.2144
cluster2673	S	FIG01258542: hypothetical protein	MP_ATCC.CDS.3068	MP36.CDS.3400	MP37.CDS.3429	MP38.CDS.3458	MP1.CDS.3451	MP2.CDS.3428	mp39.CDS.3422
cluster13	S	FIG013075: PPE family protein	MP_ATCC.CDS.1818;MP_ATCC.CDS.2216;MP_ATCC.CDS.4297	MP36.CDS.1481;MP36.CDS.4349	MP37.CDS.1360;MP37.CDS.1541;MP37.CDS.3832	MP38.CDS.1417;MP38.CDS.1601;MP38.CDS.1611	MP1.CDS.3863;MP1.CDS.1368	MP2.CDS.1543;MP2.CDS.3017;MP2.CDS.1365	mp39.CDS.1490;mp39.CDS.3818
cluster3399	S	FIG013075: PPE family protein	MP_ATCC.CDS.3903	MP36.CDS.1963	MP37.CDS.2000	MP38.CDS.2085	MP1.CDS.2029	MP2.CDS.2010	mp39.CDS.1962
cluster3400	S	FIG013075: PPE family protein	MP_ATCC.CDS.3905	MP36.CDS.1964	MP37.CDS.2001	MP38.CDS.2086	MP1.CDS.2030	MP2.CDS.2011	mp39.CDS.1963
cluster3405	S	FIG013075: PPE family protein	MP_ATCC.CDS.3910	MP36.CDS.1969	MP37.CDS.2006	MP38.CDS.2091	MP1.CDS.2035	MP2.CDS.2016	mp39.CDS.1968
cluster3406	S	FIG013075: PPE family protein	MP_ATCC.CDS.3912	MP36.CDS.1970	MP37.CDS.2007	MP38.CDS.2092	MP1.CDS.2037	MP2.CDS.2018	mp39.CDS.1970
cluster3407	S	FIG013075: PPE family protein	MP_ATCC.CDS.3913	MP36.CDS.1971	MP37.CDS.2008	MP38.CDS.2093	MP1.CDS.2038	MP2.CDS.2019	mp39.CDS.1971
cluster4299	S	FIG013075: PPE family protein							mp39.CDS.1491
cluster4344	S	FIG013075: PPE family protein							mp39.CDS.1307
cluster4666	S	FIG013075: PPE family protein		MP36.CDS.1482
cluster4693	S	FIG013075: PPE family protein		MP36.CDS.3814
cluster4955	S	FIG013075: PPE family protein		MP36.CDS.1300
cluster5153	S	FIG013075: PPE family protein					MP1.CDS.1551
cluster3617	S	FIG01349032: hypothetical protein	MP_ATCC.CDS.4150	MP36.CDS.394	MP37.CDS.450	MP38.CDS.451	MP1.CDS.458	MP2.CDS.455	mp39.CDS.394
cluster571	M	FIG01368946: Putative alanine and valine rich exported protein	MP_ATCC.CDS.592	MP36.CDS.2920	MP37.CDS.2951	MP38.CDS.2974	MP1.CDS.2977	MP2.CDS.3908	mp39.CDS.2944
cluster705	I	FIG01532326: acyltransferase, putative	MP_ATCC.CDS.755	MP36.CDS.544	MP37.CDS.603	MP38.CDS.600	MP1.CDS.608	MP2.CDS.605	mp39.CDS.545
cluster2644	S	FIG016027: protein of unknown function YeaO	MP_ATCC.CDS.3036	MP36.CDS.3366	MP37.CDS.3397	MP38.CDS.3426	MP1.CDS.3419	MP2.CDS.3461	mp39.CDS.3388
cluster1003	M	FIG016317: Probable conserved transmembrane protein	MP_ATCC.CDS.1089	MP36.CDS.3996	MP37.CDS.4010	MP38.CDS.4030	MP1.CDS.4041	MP2.CDS.4051	mp39.CDS.4001
cluster2788	R	FIG016551: Putative peptidase	MP_ATCC.CDS.3201	MP36.CDS.2341	MP37.CDS.2371	MP38.CDS.2450	MP1.CDS.2405	MP2.CDS.2401	mp39.CDS.2363
cluster3712	M	FIG017342: transmembrane protein	MP_ATCC.CDS.4255	MP36.CDS.2369	MP37.CDS.2399	MP38.CDS.2478	MP1.CDS.2433	MP2.CDS.2430	mp39.CDS.2392
cluster3339	S	FIG017534: hypothetical protein	MP_ATCC.CDS.3829	MP36.CDS.4210	MP37.CDS.4221	MP38.CDS.4241	MP1.CDS.4251	MP2.CDS.4262	mp39.CDS.4187
cluster437	S	FIG018298: PE family protein	MP_ATCC.CDS.434	MP36.CDS.1951	MP37.CDS.1986	MP38.CDS.2070	MP1.CDS.2013	MP2.CDS.1996	mp39.CDS.1947
cluster3794	R	FIG018426: putative septation inhibitor protein	MP_ATCC.CDS.1505	MP36.CDS.4306	MP37.CDS.51	MP38.CDS.50	MP1.CDS.60	MP2.CDS.60
cluster3097	S	FIG019045: long form Mg-chelase associated protein with vWA domain	MP_ATCC.CDS.3557	MP36.CDS.1029	MP37.CDS.1092	MP38.CDS.1092	MP1.CDS.1100	MP2.CDS.1100	mp39.CDS.1036
cluster2687	M	FIG019327: Probable conserved membrane protein	MP_ATCC.CDS.3088	MP36.CDS.2855	MP37.CDS.2889	MP38.CDS.1163	MP1.CDS.2919	MP2.CDS.3974	mp39.CDS.2882
cluster1233	M	FIG01964566: Predicted membrane protein, hemolysin III homolog	MP_ATCC.CDS.1356	MP36.CDS.1170	MP37.CDS.1233	MP38.CDS.1290	MP1.CDS.1240	MP2.CDS.1238	mp39.CDS.1178
cluster2830	J	FIG019733: possible DNA-binding protein	MP_ATCC.CDS.3250	MP36.CDS.2292	MP37.CDS.2323	MP38.CDS.2402	MP1.CDS.2354	MP2.CDS.2351	mp39.CDS.2288
cluster1543	S	FIG020268: hypothetical protein	MP_ATCC.CDS.1733	MP36.CDS.3137	MP37.CDS.3166	MP38.CDS.3193	MP1.CDS.3194	MP2.CDS.3690	mp39.CDS.3151
cluster3793	M	FIG020554: membrane protein	MP_ATCC.CDS.1504	MP36.CDS.4305	MP37.CDS.50	MP38.CDS.49	MP1.CDS.59	MP2.CDS.59
cluster1392	R	FIG021250: possible hydrolase	MP_ATCC.CDS.1561	MP36.CDS.3960	MP37.CDS.3976	MP38.CDS.3995	MP1.CDS.4004	MP2.CDS.4016	mp39.CDS.3966
cluster3692	S	FIG021292: hypothetical protein	MP_ATCC.CDS.4234	MP36.CDS.2348	MP37.CDS.2378	MP38.CDS.2457	MP1.CDS.2412	MP2.CDS.2408	mp39.CDS.2370
cluster3093	M	FIG021574: Possible membrane protein related to de Novo purine biosynthesis	MP_ATCC.CDS.3553	MP36.CDS.1025	MP37.CDS.1088	MP38.CDS.1088	MP1.CDS.1096	MP2.CDS.1096	mp39.CDS.1032
cluster2875	M	FIG021764: Possible membrane protein	MP_ATCC.CDS.3304	MP36.CDS.2347	MP37.CDS.2377	MP38.CDS.2456	MP1.CDS.2411	MP2.CDS.2407	mp39.CDS.2369
cluster1363	I	FIG022758: Long-chain-fatty-acid--CoA ligase (EC 6.2.1.3)	MP_ATCC.CDS.1530	MP36.CDS.19	MP37.CDS.76	MP38.CDS.75	MP1.CDS.85	MP2.CDS.84	mp39.CDS.19
cluster3335	S	FIG022958: hypothetical protein	MP_ATCC.CDS.3824	MP36.CDS.4214	MP37.CDS.4226	MP38.CDS.4246	MP1.CDS.4255	MP2.CDS.4267	mp39.CDS.4191
cluster1038	S	FIG022979: MoxR-like ATPases	MP_ATCC.CDS.1128	MP36.CDS.4036	MP37.CDS.4049	MP38.CDS.4069	MP1.CDS.4080	MP2.CDS.4089	mp39.CDS.4039
cluster2004	S	FIG022979: MoxR-like ATPases	MP_ATCC.CDS.2253	MP36.CDS.3468	MP37.CDS.3497	MP38.CDS.3523	MP1.CDS.3518	MP2.CDS.3362	mp39.CDS.3488
cluster3393	S	FIG023076: hypothetical protein in PPE gene cluster	MP_ATCC.CDS.3896	MP36.CDS.1957	MP37.CDS.1994	MP38.CDS.2079	MP1.CDS.2023	MP2.CDS.2004	mp39.CDS.1956
cluster1346	S	FIG024317: hypothetical protein	MP_ATCC.CDS.1502	MP36.CDS.4303	MP37.CDS.48	MP38.CDS.47	MP1.CDS.57	MP2.CDS.57	mp39.CDS.4269
cluster2467	M	FIG024784: Integral membrane protein related to pyrimidine synthesis	MP_ATCC.CDS.2833	MP36.CDS.1501	MP37.CDS.1560	MP38.CDS.1630	MP1.CDS.1571	MP2.CDS.1563	mp39.CDS.1510
cluster497	S	FIG024795: hypothetical protein	MP_ATCC.CDS.506	MP36.CDS.2585	MP37.CDS.2618	MP38.CDS.2692	MP1.CDS.2646	MP2.CDS.2641	mp39.CDS.2609
cluster873	M	FIG025093: Probable membrane protein	MP_ATCC.CDS.942	MP36.CDS.731	MP37.CDS.791	MP38.CDS.788	MP1.CDS.798	MP2.CDS.797	mp39.CDS.735
cluster3422	S	FIG025307: hypothetical protein	MP_ATCC.CDS.3928	MP36.CDS.1988	MP37.CDS.2025	MP38.CDS.2110	MP1.CDS.2054	MP2.CDS.2052	mp39.CDS.1988
cluster502	S	FIG025412: hypothetical protein	MP_ATCC.CDS.511	MP36.CDS.2580	MP37.CDS.2613	MP38.CDS.2687	MP1.CDS.2641	MP2.CDS.2636	mp39.CDS.2604
cluster2384	S	FIG027348: hypothetical protein	MP_ATCC.CDS.2717	MP36.CDS.1636	MP37.CDS.1682	MP38.CDS.1759	MP1.CDS.1703	MP2.CDS.1694	mp39.CDS.1646
cluster2734	S	FIG027887: hypothetical protein	MP_ATCC.CDS.3143	MP36.CDS.2800	MP37.CDS.2834	MP38.CDS.2912	MP1.CDS.2864	MP2.CDS.2857	mp39.CDS.2830
cluster195	U	FIG027937: secreted protein	MP_ATCC.CDS.150	MP36.CDS.3947	MP37.CDS.3964	MP38.CDS.3983	MP1.CDS.3991	MP2.CDS.4003	mp39.CDS.3952
cluster3633	S	FIG027960: hypothetical protein	MP_ATCC.CDS.4166	MP36.CDS.378	MP37.CDS.434	MP38.CDS.435	MP1.CDS.442	MP2.CDS.439	mp39.CDS.378
cluster1272	S	FIG028963: hypothetical protein	MP_ATCC.CDS.1402	MP36.CDS.1219	MP37.CDS.1280	MP38.CDS.1336	MP1.CDS.1288	MP2.CDS.1286	mp39.CDS.1226
cluster2898	S	FIG029313: hypothetical protein Rv2000/MT2056	MP_ATCC.CDS.3334	MP36.CDS.2177	MP37.CDS.2208	MP38.CDS.2290	MP1.CDS.2240	MP2.CDS.2239	mp39.CDS.2169
cluster2471	S	FIG029924: hypothetical protein	MP_ATCC.CDS.2838	MP36.CDS.1496	MP37.CDS.1555	MP38.CDS.1625	MP1.CDS.1566	MP2.CDS.1558	mp39.CDS.1505
cluster2732	S	FIG030001: hypothetical protein	MP_ATCC.CDS.3141	MP36.CDS.2802	MP37.CDS.2836	MP38.CDS.2914	MP1.CDS.2866	MP2.CDS.2859	mp39.CDS.2832
cluster3421	S	FIG030330: hypothetical protein	MP_ATCC.CDS.3927	MP36.CDS.1987	MP37.CDS.2024	MP38.CDS.2109	MP1.CDS.2053	MP2.CDS.2051	mp39.CDS.1987
cluster770	S	FIG030357: hypothetical protein	MP_ATCC.CDS.826	MP36.CDS.614	MP37.CDS.674	MP38.CDS.672	MP1.CDS.680	MP2.CDS.678	mp39.CDS.618
cluster2281	M	FIG030769: Probable conserved MCE associated membrane protein	MP_ATCC.CDS.2598	MP36.CDS.183	MP37.CDS.237	MP38.CDS.237	MP1.CDS.245	MP2.CDS.244	mp39.CDS.179
cluster1665	S	FIG030803: Hypothetical protein	MP_ATCC.CDS.1874	MP36.CDS.3495	MP37.CDS.3524	MP38.CDS.3550	MP1.CDS.3546	MP2.CDS.3335	mp39.CDS.3514
cluster2022	S	FIG031049: Hypothetical protein	MP_ATCC.CDS.2273	MP36.CDS.3488	MP37.CDS.3517	MP38.CDS.3543	MP1.CDS.3539	MP2.CDS.3342	mp39.CDS.3508
cluster2310	S	FIG032248: hypothetical protein	MP_ATCC.CDS.2633	MP36.CDS.217	MP37.CDS.270	MP38.CDS.272	MP1.CDS.278	MP2.CDS.278	mp39.CDS.213
cluster633	S	FIG032330: hypothetical protein	MP_ATCC.CDS.661	MP36.CDS.2987	MP37.CDS.3018	MP38.CDS.3041	MP1.CDS.3044	MP2.CDS.3841	mp39.CDS.3012
cluster2023	S	FIG032362: Hypothetical protein	MP_ATCC.CDS.2275	MP36.CDS.3490	MP37.CDS.3519	MP38.CDS.3545	MP1.CDS.3541	MP2.CDS.3340	mp39.CDS.3510
cluster326	S	FIG032699: hypothetical protein	MP_ATCC.CDS.308	MP36.CDS.2484	MP37.CDS.2514	MP38.CDS.2591	MP1.CDS.2547	MP2.CDS.2543	mp39.CDS.2509
cluster3057	S	FIG032766: hypothetical protein	MP_ATCC.CDS.3514	MP36.CDS.986	MP37.CDS.1050	MP38.CDS.1050	MP1.CDS.1056	MP2.CDS.1056	mp39.CDS.991
cluster2279	M	FIG033285: Conserved MCE associated transmembrane protein	MP_ATCC.CDS.2596	MP36.CDS.181	MP37.CDS.235	MP38.CDS.235	MP1.CDS.243	MP2.CDS.242	mp39.CDS.177
cluster1972	S	FIG033348: hypothetical protein	MP_ATCC.CDS.2217	MP36.CDS.2125	MP37.CDS.2159	MP38.CDS.2240	MP1.CDS.2189	MP2.CDS.2188	mp39.CDS.2120
cluster2278	M	FIG033430: Probable conserved MCE associated membrane protein	MP_ATCC.CDS.2595	MP36.CDS.180	MP37.CDS.234	MP38.CDS.234	MP1.CDS.242	MP2.CDS.241	mp39.CDS.176
cluster2842	S	FIG033455: hypothetical protein	MP_ATCC.CDS.3266	MP36.CDS.2274	MP37.CDS.2304	MP38.CDS.2388	MP1.CDS.2338	MP2.CDS.2335	mp39.CDS.2273
cluster2311	S	FIG033897: hypothetical protein	MP_ATCC.CDS.2634	MP36.CDS.218	MP37.CDS.271	MP38.CDS.273	MP1.CDS.279	MP2.CDS.279	mp39.CDS.214
cluster2280	M	FIG034772: Probable conserved MCE associated protein	MP_ATCC.CDS.2597	MP36.CDS.182	MP37.CDS.236	MP38.CDS.236	MP1.CDS.244	MP2.CDS.243	mp39.CDS.178
cluster2021	S	FIG035400: Hypothetical protein	MP_ATCC.CDS.2272	MP36.CDS.3487	MP37.CDS.3516	MP38.CDS.3542	MP1.CDS.3538	MP2.CDS.3343	mp39.CDS.3507
cluster802	S	FIG036071: hypothetical protein	MP_ATCC.CDS.863	MP36.CDS.652	MP37.CDS.711	MP38.CDS.709	MP1.CDS.718	MP2.CDS.717	mp39.CDS.655
cluster2024	K	FIG036183: Transcriptional regulator, XRE family	MP_ATCC.CDS.2276	MP36.CDS.3491	MP37.CDS.3520	MP38.CDS.3546	MP1.CDS.3542	MP2.CDS.3339	mp39.CDS.3511
cluster2910	S	FIG036251: Hypothetical protein	MP_ATCC.CDS.3346	MP36.CDS.2165	MP37.CDS.2196	MP38.CDS.2278	MP1.CDS.2228	MP2.CDS.2227	mp39.CDS.2157
cluster2530	M	FIG037137: Putative conserved transmembrane protein	MP_ATCC.CDS.2909	MP36.CDS.1065	MP37.CDS.1130	MP38.CDS.1186	MP1.CDS.1138	MP2.CDS.1137	mp39.CDS.1077
cluster5493	M	FIG037137: Putative conserved transmembrane protein							mp39.CDS.1076
cluster3704	S	FIG038012: hypothetical protein	MP_ATCC.CDS.4246	MP36.CDS.2360	MP37.CDS.2390	MP38.CDS.2469	MP1.CDS.2424	MP2.CDS.2420	mp39.CDS.2382
cluster1645	H	FIG038648: MoaD and/or ThiS families	MP_ATCC.CDS.1847	MP36.CDS.1451	MP37.CDS.1512	MP38.CDS.1572	MP1.CDS.1522	MP2.CDS.1514	mp39.CDS.1461
cluster3504	S	FIG042201: hypothetical protein	MP_ATCC.CDS.4018	MP36.CDS.2083	MP37.CDS.2119	MP38.CDS.2200	MP1.CDS.2147	MP2.CDS.2147	mp39.CDS.2079
cluster367	S	FIG042796: Hypothetical protein	MP_ATCC.CDS.356	MP36.CDS.2435	MP37.CDS.2465	MP38.CDS.2545	MP1.CDS.2499	MP2.CDS.2495	mp39.CDS.2460
cluster1664	S	FIG043360: Hypothetical protein	MP_ATCC.CDS.1873	MP36.CDS.3494	MP37.CDS.3523	MP38.CDS.3549	MP1.CDS.3545	MP2.CDS.3336	mp39.CDS.3513
cluster1001	S	FIG043778: hypothetical protein	MP_ATCC.CDS.1087	MP36.CDS.3994	MP37.CDS.4008	MP38.CDS.4028	MP1.CDS.4039	MP2.CDS.4049	mp39.CDS.3999
cluster1663	S	FIG046480: Hypothetical protein	MP_ATCC.CDS.1872	MP36.CDS.3493	MP37.CDS.3522	MP38.CDS.3548	MP1.CDS.3544	MP2.CDS.3337	mp39.CDS.3512
cluster2683	F, G	FIG049476: HIT family protein	MP_ATCC.CDS.3084	MP36.CDS.2859	MP37.CDS.2893	MP38.CDS.1167	MP1.CDS.2923	MP2.CDS.3970	mp39.CDS.2886
cluster1002	M	FIG054221: Possible conserved alanine rich membrane protein	MP_ATCC.CDS.1088	MP36.CDS.3995	MP37.CDS.4009	MP38.CDS.4029	MP1.CDS.4040	MP2.CDS.4050	mp39.CDS.4000
cluster2783	D	FIG055075: Possibly a cell division protein, antigen 84 in Mycobacteria	MP_ATCC.CDS.3196	MP36.CDS.2346	MP37.CDS.2376	MP38.CDS.2455	MP1.CDS.2410	MP2.CDS.2406	mp39.CDS.2368
cluster886	S	FIG055611: hypothetical protein	MP_ATCC.CDS.957	MP36.CDS.745	MP37.CDS.805	MP38.CDS.802	MP1.CDS.812	MP2.CDS.811	mp39.CDS.749
cluster2214	D	FIG056164: rhomboid family serine protease	MP_ATCC.CDS.2522	MP36.CDS.104	MP37.CDS.161	MP38.CDS.161	MP1.CDS.169	MP2.CDS.168	mp39.CDS.103
cluster3000	S	FIG057355: hypothetical protein	MP_ATCC.CDS.3449	MP36.CDS.920	MP37.CDS.985	MP38.CDS.986	MP1.CDS.989	MP2.CDS.991	mp39.CDS.925
cluster1667	S	FIG064496: Hypothetical protein	MP_ATCC.CDS.1876	MP36.CDS.3497	MP37.CDS.3526	MP38.CDS.3552	MP1.CDS.3548	MP2.CDS.3333	mp39.CDS.3516
cluster1666	S	FIG069748: Hypothetical protein	MP_ATCC.CDS.1875	MP36.CDS.3496	MP37.CDS.3525	MP38.CDS.3551	MP1.CDS.3547	MP2.CDS.3334	mp39.CDS.3515
cluster3343	S	FIG091491: hypothetical protein	MP_ATCC.CDS.3833	MP36.CDS.4206	MP37.CDS.4217	MP38.CDS.4237	MP1.CDS.4247	MP2.CDS.4258	mp39.CDS.4183
cluster3561	S	FIG111991: hypothetical protein	MP_ATCC.CDS.4081	MP36.CDS.461	MP37.CDS.519	MP38.CDS.517	MP1.CDS.524	MP2.CDS.521	mp39.CDS.462
cluster368	S	FIG137478: Hypothetical protein	MP_ATCC.CDS.357	MP36.CDS.2434	MP37.CDS.2464	MP38.CDS.2544	MP1.CDS.2498	MP2.CDS.2494	mp39.CDS.2459
cluster3196	C	FIG143263: Glycosyl transferase / Lysophospholipid acyltransferase	MP_ATCC.CDS.3668	MP36.CDS.1359	MP37.CDS.1419	MP38.CDS.1480	MP1.CDS.1430	MP2.CDS.1425	mp39.CDS.1366
cluster1569	A	FIG146085: 3'-to-5' oligoribonuclease A,	MP_ATCC.CDS.1761	MP36.CDS.3107	MP37.CDS.3137	MP38.CDS.3164	MP1.CDS.3165	MP2.CDS.3720	mp39.CDS.3122
cluster1022	R	FIG146518: Zn-dependent hydrolases, including glyoxylases	MP_ATCC.CDS.1111	MP36.CDS.4018	MP37.CDS.4032	MP38.CDS.4051	MP1.CDS.4062	MP2.CDS.4071	mp39.CDS.4021
cluster1345	S	FIG187021: hypothetical protein	MP_ATCC.CDS.1499	MP36.CDS.4300	MP37.CDS.45	MP38.CDS.45	MP1.CDS.54	MP2.CDS.54	mp39.CDS.4266
cluster3795	M	FIG215594: Membrane spanning protein	MP_ATCC.CDS.1506	MP36.CDS.4307	MP37.CDS.52	MP38.CDS.51	MP1.CDS.61	MP2.CDS.61
cluster3376	S	FIG305449: hypothetical protein	MP_ATCC.CDS.3879	MP36.CDS.3288	MP37.CDS.3317	MP38.CDS.3346	MP1.CDS.3340	MP2.CDS.3540	mp39.CDS.3307
cluster1714	S	Flavodoxin reductases (ferredoxin-NADPH reductases) family 1	MP_ATCC.CDS.1929	MP36.CDS.3550	MP37.CDS.3581	MP38.CDS.3603	MP1.CDS.3601	MP2.CDS.3279	mp39.CDS.3569
cluster3614	S	Flavohemoprotein (Hemoglobin-like protein) (Flavohemoglobin) (Nitric oxide dioxygenase) (EC 1.14.12.17)	MP_ATCC.CDS.4146	MP36.CDS.398	MP37.CDS.454	MP38.CDS.455	MP1.CDS.462	MP2.CDS.459	mp39.CDS.398
cluster347	S	Flavoprotein	MP_ATCC.CDS.332	MP36.CDS.2459	MP37.CDS.2490	MP38.CDS.2569	MP1.CDS.2523	MP2.CDS.2519	mp39.CDS.2484
cluster1004	C	Flp pilus assembly protein, ATPase CpaF	MP_ATCC.CDS.1090	MP36.CDS.3997	MP37.CDS.4011	MP38.CDS.4031	MP1.CDS.4042	MP2.CDS.4052	mp39.CDS.4002
cluster2879	C	Folate-dependent protein for Fe/S cluster synthesis/repair in oxidative stress	MP_ATCC.CDS.3311	MP36.CDS.863	MP37.CDS.926	MP38.CDS.929	MP1.CDS.932	MP2.CDS.934	mp39.CDS.869
cluster339	S	Formaldehyde dehydrogenase MscR, NAD/mycothiol-dependent (EC 1.2.1.66) / S-nitrosomycothiol reductase MscR	MP_ATCC.CDS.324	MP36.CDS.2467	MP37.CDS.2498	MP38.CDS.2577	MP1.CDS.2531	MP2.CDS.2527	mp39.CDS.2492
cluster258	L	Formamidopyrimidine-DNA glycosylase (EC 3.2.2.23)	MP_ATCC.CDS.228	MP36.CDS.3205	MP37.CDS.3234	MP38.CDS.3262	MP1.CDS.3262	MP2.CDS.3621	mp39.CDS.3219
cluster3082	D	Formamidopyrimidine-DNA glycosylase (EC 3.2.2.23)	MP_ATCC.CDS.3539	MP36.CDS.1011	MP37.CDS.1075	MP38.CDS.1075	MP1.CDS.1081	MP2.CDS.1081	mp39.CDS.1017
cluster1507	C	Formate dehydrogenase chain D (EC 1.2.1.2)	MP_ATCC.CDS.1692	MP36.CDS.3179	MP37.CDS.3207	MP38.CDS.3235	MP1.CDS.3236	MP2.CDS.3648	mp39.CDS.3192
cluster2299	C	Formate dehydrogenase-O, major subunit (EC 1.2.1.2)	MP_ATCC.CDS.2620	MP36.CDS.205	MP37.CDS.258	MP38.CDS.259	MP1.CDS.266	MP2.CDS.265	mp39.CDS.201
cluster5229	C	Formate dehydrogenase-O, major subunit (EC 1.2.1.2)						MP2.CDS.266
cluster1191	C	Formate hydrogenlyase subunit 4	MP_ATCC.CDS.1301	MP36.CDS.76	MP37.CDS.134	MP38.CDS.131	MP1.CDS.141	MP2.CDS.141	mp39.CDS.76
cluster1194	C	Formate hydrogenlyase subunit 5	MP_ATCC.CDS.1304	MP36.CDS.79	MP37.CDS.137	MP38.CDS.134	MP1.CDS.144	MP2.CDS.144	mp39.CDS.79
cluster1189	C	Formate hydrogenlyase subunit 7	MP_ATCC.CDS.1299	MP36.CDS.74	MP37.CDS.132	MP38.CDS.129	MP1.CDS.139	MP2.CDS.139	mp39.CDS.74
cluster219	S	Formyltetrahydrofolate deformylase (EC 3.5.1.10)	MP_ATCC.CDS.177	MP36.CDS.3252	MP37.CDS.3281	MP38.CDS.3309	MP1.CDS.3305	MP2.CDS.3577	mp39.CDS.3269
cluster2540	S	formyltransferase	MP_ATCC.CDS.2921	MP36.CDS.3732	MP37.CDS.3762	MP38.CDS.3783	MP1.CDS.3781	MP2.CDS.3097	mp39.CDS.3752
cluster1246	L	Fructose-1,6-bisphosphatase, GlpX type (EC 3.1.3.11)	MP_ATCC.CDS.1374	MP36.CDS.1191	MP37.CDS.1253	MP38.CDS.1310	MP1.CDS.1261	MP2.CDS.1258	mp39.CDS.1199
cluster3636	G	Fructose-bisphosphate aldolase class II (EC 4.1.2.13)	MP_ATCC.CDS.4169	MP36.CDS.375	MP37.CDS.431	MP38.CDS.432	MP1.CDS.439	MP2.CDS.436	mp39.CDS.375
cluster3634	G	fructose-bisphosphate aldolase family protein	MP_ATCC.CDS.4167	MP36.CDS.377	MP37.CDS.433	MP38.CDS.434	MP1.CDS.441	MP2.CDS.438	mp39.CDS.377
cluster1300	D	FtsK/SpoIIIE family protein	MP_ATCC.CDS.1436	MP36.CDS.4235	MP37.CDS.4246	MP38.CDS.4266	MP1.CDS.4275	MP2.CDS.4287	mp39.CDS.4212
cluster1311	D	FtsK/SpoIIIE family protein	MP_ATCC.CDS.1464	MP36.CDS.4265	MP37.CDS.10	MP38.CDS.10	MP1.CDS.19	MP2.CDS.19	mp39.CDS.4230
cluster27	D, J	FtsK/SpoIIIE family protein	MP_ATCC.CDS.2382;MP_ATCC.CDS.2962	MP36.CDS.295;MP36.CDS.3786	MP37.CDS.350;MP37.CDS.3804	MP38.CDS.351;MP38.CDS.3835	MP1.CDS.358;MP1.CDS.3835	MP2.CDS.3044;MP2.CDS.356	mp39.CDS.293;mp39.CDS.3791
cluster3780	D, J	FtsK/SpoIIIE family protein EccCb1, component of Type VII secretion system ESX-1	MP_ATCC.CDS.1437	MP36.CDS.4237	MP37.CDS.4248		MP1.CDS.4277	MP2.CDS.4289	mp39.CDS.4214
cluster4480	D, J	FtsK/SpoIIIE family protein EccCb1, component of Type VII secretion system ESX-1				MP38.CDS.4267
cluster1245	C	Fumarate hydratase class II (EC 4.2.1.2)	MP_ATCC.CDS.1373	MP36.CDS.1190	MP37.CDS.1252	MP38.CDS.1309	MP1.CDS.1260	MP2.CDS.1257	mp39.CDS.1198
cluster87	C	Fumarate reductase subunit C	MP_ATCC.CDS.22	MP36.CDS.1696	MP37.CDS.1739	MP38.CDS.1817	MP1.CDS.1761	MP2.CDS.1737	mp39.CDS.1698
cluster86	C	Fumarate reductase subunit D	MP_ATCC.CDS.21	MP36.CDS.1697	MP37.CDS.1740	MP38.CDS.1818	MP1.CDS.1762	MP2.CDS.1738	mp39.CDS.1699
cluster3415	C	fumarate reductase/succinate dehydrogenase flavoprotein, N-terminal:FAD dependent oxidoreductase	MP_ATCC.CDS.3921	MP36.CDS.1979	MP37.CDS.2016	MP38.CDS.2101	MP1.CDS.2046	MP2.CDS.2027	mp39.CDS.1979
cluster974	C	Fumarate/succinate/L-aspartate dehydrogenases	MP_ATCC.CDS.1054	MP36.CDS.837	MP37.CDS.900	MP38.CDS.903	MP1.CDS.906	MP2.CDS.907	mp39.CDS.844
cluster975	C	Fumarate/succinate/L-aspartate dehydrogenases	MP_ATCC.CDS.1055	MP36.CDS.838	MP37.CDS.901	MP38.CDS.904	MP1.CDS.907	MP2.CDS.908	mp39.CDS.845
cluster3078	C	Fumarylacetoacetase (EC 3.7.1.2)	MP_ATCC.CDS.3535	MP36.CDS.1007	MP37.CDS.1071	MP38.CDS.1071	MP1.CDS.1077	MP2.CDS.1077	mp39.CDS.1013
cluster3727	G	Galactofuranosyl transferase (EC 2.-.-.-)	MP_ATCC.CDS.4272	MP36.CDS.4162	MP37.CDS.4173	MP38.CDS.4194	MP1.CDS.4204	MP2.CDS.4214	mp39.CDS.4139
cluster808	G	Galactokinase (EC 2.7.1.6)	MP_ATCC.CDS.869	MP36.CDS.658	MP37.CDS.717	MP38.CDS.715	MP1.CDS.724	MP2.CDS.723	mp39.CDS.661
cluster807	G	Galactose-1-phosphate uridylyltransferase (EC 2.7.7.10)	MP_ATCC.CDS.868	MP36.CDS.657	MP37.CDS.716	MP38.CDS.714	MP1.CDS.723	MP2.CDS.722	mp39.CDS.660
cluster2604	G	Galactoside O-acetyltransferase (EC 2.3.1.18)	MP_ATCC.CDS.2992	MP36.CDS.3323	MP37.CDS.3355	MP38.CDS.3382	MP1.CDS.3376	MP2.CDS.3504	mp39.CDS.3344
cluster710	E	gamma-aminobutyrate (GABA) permease @ L-arginine permease	MP_ATCC.CDS.761	MP36.CDS.550	MP37.CDS.609	MP38.CDS.606	MP1.CDS.614	MP2.CDS.611	mp39.CDS.551
cluster2706	R	Gamma-aminobutyrate:alpha-ketoglutarate aminotransferase (EC 2.6.1.19)	MP_ATCC.CDS.3109	MP36.CDS.2834	MP37.CDS.2868	MP38.CDS.1142	MP1.CDS.2897	MP2.CDS.2891	mp39.CDS.2861
cluster4720	R	Gamma-aminobutyrate:alpha-ketoglutarate aminotransferase (EC 2.6.1.19)							mp39.CDS.2860
cluster1407	R	Gamma-glutamyl phosphate reductase (EC 1.2.1.41)	MP_ATCC.CDS.1579	MP36.CDS.2659	MP37.CDS.2690	MP38.CDS.2767	MP1.CDS.2719	MP2.CDS.2714	mp39.CDS.2684
cluster469	E	Gamma-glutamyltranspeptidase (EC 2.3.2.2)	MP_ATCC.CDS.474	MP36.CDS.2617	MP37.CDS.2649	MP38.CDS.2724	MP1.CDS.2678	MP2.CDS.2673	mp39.CDS.2641
cluster962	E	Gamma-glutamyltranspeptidase (EC 2.3.2.2)	MP_ATCC.CDS.1042	MP36.CDS.825	MP37.CDS.888	MP38.CDS.891	MP1.CDS.894	MP2.CDS.894	mp39.CDS.832
cluster963	E	Gamma-glutamyltranspeptidase (EC 2.3.2.2)	MP_ATCC.CDS.1043	MP36.CDS.826	MP37.CDS.889	MP38.CDS.892	MP1.CDS.895	MP2.CDS.895	mp39.CDS.833
cluster1698	M	GCN5-related N-acetyltransferase	MP_ATCC.CDS.1913	MP36.CDS.3532	MP37.CDS.3563	MP38.CDS.3586	MP1.CDS.3584	MP2.CDS.3297	mp39.CDS.3551
cluster1537	M	GCN5-related N-acetyltransferase, FIGfam019367	MP_ATCC.CDS.1726	MP36.CDS.3144	MP37.CDS.3173	MP38.CDS.3200	MP1.CDS.3201	MP2.CDS.3683	mp39.CDS.3158
cluster3871	M	GCN5-related N-acetyltransferase; Histone acetyltransferase HPA2 and related acetyltransferases		MP36.CDS.3070	MP37.CDS.3099	MP38.CDS.3123	MP1.CDS.3127	MP2.CDS.3758	mp39.CDS.3085
cluster3757	M	GDP-L-fucose synthetase (EC 1.1.1.271)	MP_ATCC.CDS.67	MP36.CDS.1649	MP37.CDS.1693	MP38.CDS.1771	MP1.CDS.1715	MP2.CDS.2041
cluster2216	M	GDP-mannose 4,6-dehydratase (EC 4.2.1.47)	MP_ATCC.CDS.2524	MP36.CDS.106	MP37.CDS.163	MP38.CDS.163	MP1.CDS.171	MP2.CDS.170	mp39.CDS.105
cluster2377	M	GDP-mannose 4,6-dehydratase (EC 4.2.1.47)	MP_ATCC.CDS.2709	MP36.CDS.1644	MP37.CDS.1689	MP38.CDS.1767	MP1.CDS.1711	MP2.CDS.1702	mp39.CDS.1653
cluster3758	M	GDP-mannose 4,6-dehydratase (EC 4.2.1.47)	MP_ATCC.CDS.68	MP36.CDS.1648	MP37.CDS.1692	MP38.CDS.1770	MP1.CDS.1714	MP2.CDS.2042
cluster2156	S	gene 36 protein, putative	MP_ATCC.CDS.2445	MP36.CDS.2910	MP37.CDS.2942	MP38.CDS.2964	MP1.CDS.2969	MP2.CDS.3917	mp39.CDS.2936
cluster3716	C	Geranylgeranyl diphosphate synthase (EC 2.5.1.29)	MP_ATCC.CDS.4259	MP36.CDS.2373	MP37.CDS.2403	MP38.CDS.2482	MP1.CDS.2437	MP2.CDS.2434	mp39.CDS.2396
cluster2958	C	GlnR-family transcriptional regulator	MP_ATCC.CDS.3400	MP36.CDS.871	MP37.CDS.933	MP38.CDS.936	MP1.CDS.939	MP2.CDS.941	mp39.CDS.876
cluster459	C	Glucoamylase (EC 3.2.1.3)	MP_ATCC.CDS.464	MP36.CDS.2629	MP37.CDS.2660	MP38.CDS.2736	MP1.CDS.2689	MP2.CDS.2684	mp39.CDS.2653
cluster2567	G	Glucosamine--fructose-6-phosphate aminotransferase [isomerizing] (EC 2.6.1.16)	MP_ATCC.CDS.2951	MP36.CDS.3774	MP37.CDS.3793	MP38.CDS.3824	MP1.CDS.3824	MP2.CDS.3055	mp39.CDS.3781
cluster3238	G	Glucose-1-phosphate adenylyltransferase (EC 2.7.7.27)	MP_ATCC.CDS.3711	MP36.CDS.1314	MP37.CDS.1376	MP38.CDS.1434	MP1.CDS.1384	MP2.CDS.1380	mp39.CDS.1321
cluster2068	G	Glucose-1-phosphate thymidylyltransferase (EC 2.7.7.24)	MP_ATCC.CDS.2332	MP36.CDS.345	MP37.CDS.400	MP38.CDS.402	MP1.CDS.408	MP2.CDS.406	mp39.CDS.344
cluster1268	G	Glucose-6-phosphate 1-dehydrogenase (EC 1.1.1.49)	MP_ATCC.CDS.1397	MP36.CDS.1214	MP37.CDS.1276	MP38.CDS.1332	MP1.CDS.1284	MP2.CDS.1281	mp39.CDS.1222
cluster3822	G	Glucose-6-phosphate 1-dehydrogenase (EC 1.1.1.49)	MP_ATCC.CDS.2760	MP36.CDS.1572		MP38.CDS.1701	MP1.CDS.1643	MP2.CDS.1652	mp39.CDS.1583
cluster3084	G	Glucose-6-phosphate isomerase (EC 5.3.1.9)	MP_ATCC.CDS.3541	MP36.CDS.1013	MP37.CDS.1077	MP38.CDS.1077	MP1.CDS.1083	MP2.CDS.1083	mp39.CDS.1019
cluster3367	G	Glucose/sorbosone dehydrogenase, lipoprotein LppZ	MP_ATCC.CDS.3867	MP36.CDS.3298	MP37.CDS.3329	MP38.CDS.3356	MP1.CDS.3350	MP2.CDS.3530	mp39.CDS.3318
cluster1421	M	Glutamate 5-kinase (EC 2.7.2.11) / RNA-binding C-terminal domain PUA	MP_ATCC.CDS.1597	MP36.CDS.2676	MP37.CDS.2707	MP38.CDS.2784	MP1.CDS.2736	MP2.CDS.2731	mp39.CDS.2701
cluster2563	M	Glutamate decarboxylase (EC 4.1.1.15)	MP_ATCC.CDS.2946	MP36.CDS.3769	MP37.CDS.3788	MP38.CDS.3819	MP1.CDS.3819	MP2.CDS.3061	mp39.CDS.3776
cluster1876	M	Glutamate N-acetyltransferase (EC 2.3.1.35) / N-acetylglutamate synthase (EC 2.3.1.1)	MP_ATCC.CDS.2106	MP36.CDS.1788	MP37.CDS.1828	MP38.CDS.1909	MP1.CDS.1852	MP2.CDS.1829	mp39.CDS.1788
cluster1642	M	Glutamate racemase (EC 5.1.1.3)	MP_ATCC.CDS.1844	MP36.CDS.1454	MP37.CDS.1515	MP38.CDS.1575	MP1.CDS.1525	MP2.CDS.1517	mp39.CDS.1464
cluster3326	M	Glutamate synthase [NADPH] large chain (EC 1.4.1.13)	MP_ATCC.CDS.3814	MP36.CDS.4224	MP37.CDS.4236	MP38.CDS.4256	MP1.CDS.4265	MP2.CDS.4277	mp39.CDS.4201
cluster3327	E	Glutamate synthase [NADPH] small chain (EC 1.4.1.13)	MP_ATCC.CDS.3815	MP36.CDS.4223	MP37.CDS.4235	MP38.CDS.4255	MP1.CDS.4264	MP2.CDS.4276	mp39.CDS.4200
cluster712	E	Glutamate-1-semialdehyde aminotransferase (EC 5.4.3.8)	MP_ATCC.CDS.763	MP36.CDS.552	MP37.CDS.611	MP38.CDS.608	MP1.CDS.616	MP2.CDS.613	mp39.CDS.553
cluster61	M	Glutamate-ammonia-ligase adenylyltransferase (EC 2.7.7.42)	MP_ATCC.CDS.366;MP_ATCC.CDS.367	MP36.CDS.2425	MP37.CDS.2455	MP38.CDS.2535	MP1.CDS.2489	MP2.CDS.2485	mp39.CDS.2450
cluster3593	M	Glutamine ABC transporter, periplasmic glutamine-binding protein (TC 3.A.1.3.2)	MP_ATCC.CDS.4115	MP36.CDS.427	MP37.CDS.484	MP38.CDS.483	MP1.CDS.490	MP2.CDS.487	mp39.CDS.428
cluster1050	P, E	Glutamine amidotransferases class-II	MP_ATCC.CDS.1140	MP36.CDS.4049	MP37.CDS.4061	MP38.CDS.4081	MP1.CDS.4092	MP2.CDS.4102	mp39.CDS.4051
cluster1210	P, E	Glutamine amidotransferases class-II	MP_ATCC.CDS.1329	MP36.CDS.1143	MP37.CDS.1207	MP38.CDS.1263	MP1.CDS.1214	MP2.CDS.1212	mp39.CDS.1153
cluster3473	P, E	Glutamine synthetase (EC 6.3.1.2), putative	MP_ATCC.CDS.3983	MP36.CDS.2047	MP37.CDS.2083	MP38.CDS.2165	MP1.CDS.2112	MP2.CDS.2110	mp39.CDS.2042
cluster1545	E	Glutamine synthetase family protein in hypothetical Actinobacterial gene cluster	MP_ATCC.CDS.1735	MP36.CDS.3135	MP37.CDS.3164	MP38.CDS.3191	MP1.CDS.3192	MP2.CDS.3692	mp39.CDS.3149
cluster376	E	Glutamine synthetase type I (EC 6.3.1.2)	MP_ATCC.CDS.365	MP36.CDS.2426	MP37.CDS.2456	MP38.CDS.2536	MP1.CDS.2490	MP2.CDS.2486	mp39.CDS.2451
cluster377	E	Glutamine synthetase type I (EC 6.3.1.2)	MP_ATCC.CDS.368	MP36.CDS.2424	MP37.CDS.2454	MP38.CDS.2534	MP1.CDS.2488	MP2.CDS.2484	mp39.CDS.2448
cluster2995	E	Glutamine-dependent 2-keto-4-methylthiobutyrate transaminase	MP_ATCC.CDS.3444	MP36.CDS.915	MP37.CDS.979	MP38.CDS.981	MP1.CDS.984	MP2.CDS.986	mp39.CDS.920
cluster1145	E	Glutamyl-tRNA reductase (EC 1.2.1.70)	MP_ATCC.CDS.1248	MP36.CDS.536	MP37.CDS.595	MP38.CDS.592	MP1.CDS.600	MP2.CDS.597	mp39.CDS.537
cluster3381	H	Glutamyl-tRNA synthetase (EC 6.1.1.17) @ Glutamyl-tRNA(Gln) synthetase (EC 6.1.1.24)	MP_ATCC.CDS.3884	MP36.CDS.3283	MP37.CDS.3311	MP38.CDS.3340	MP1.CDS.3335	MP2.CDS.3546	mp39.CDS.3302
cluster3278	H	Glutamyl-tRNA(Gln) amidotransferase subunit A-like protein	MP_ATCC.CDS.3757	MP36.CDS.3702	MP37.CDS.3732	MP38.CDS.3754	MP1.CDS.3752	MP2.CDS.3127	mp39.CDS.3721
cluster2624	H	Glutaredoxin-like protein NrdH, required for reduction of Ribonucleotide reductase class Ib	MP_ATCC.CDS.3014	MP36.CDS.3344	MP37.CDS.3376	MP38.CDS.3404	MP1.CDS.3397	MP2.CDS.3483	mp39.CDS.3365
cluster3433	H	Glutaryl-7-ACA acylase	MP_ATCC.CDS.3940	MP36.CDS.2001	MP37.CDS.2037	MP38.CDS.2121	MP1.CDS.2065	MP2.CDS.2064	mp39.CDS.1999
cluster3601	H	Glutaryl-CoA dehydrogenase (EC 1.3.99.7)	MP_ATCC.CDS.4126	MP36.CDS.416	MP37.CDS.473	MP38.CDS.473	MP1.CDS.479	MP2.CDS.476	mp39.CDS.417
cluster393	C	Glycerate kinase (EC 2.7.1.31)	MP_ATCC.CDS.384	MP36.CDS.2406	MP37.CDS.2437	MP38.CDS.2516	MP1.CDS.2471	MP2.CDS.2467	mp39.CDS.2431
cluster3998	C	Glycerate kinase (EC 2.7.1.31)		MP36.CDS.2407	MP37.CDS.2438	MP38.CDS.2517
cluster1042	C	Glycerol kinase (EC 2.7.1.30)	MP_ATCC.CDS.1132	MP36.CDS.4040	MP37.CDS.4053	MP38.CDS.4073	MP1.CDS.4084	MP2.CDS.4093	mp39.CDS.4043
cluster4059	C	Glycerol kinase (EC 2.7.1.30)		MP36.CDS.4041				MP2.CDS.4094
cluster1574	C	Glycerol-3-phosphate ABC transporter, ATP-binding protein UgpC (TC 3.A.1.1.3)	MP_ATCC.CDS.1767	MP36.CDS.3101	MP37.CDS.3131	MP38.CDS.3158	MP1.CDS.3159	MP2.CDS.3726	mp39.CDS.3116
cluster3124	C	Glycerol-3-phosphate ABC transporter, ATP-binding protein UgpC (TC 3.A.1.1.3)	MP_ATCC.CDS.3588	MP36.CDS.2227	MP37.CDS.2257	MP38.CDS.2340	MP1.CDS.2288	MP2.CDS.2287	mp39.CDS.2223
cluster1573	C	Glycerol-3-phosphate ABC transporter, periplasmic glycerol-3-phosphate-binding protein (TC 3.A.1.1.3)	MP_ATCC.CDS.1766	MP36.CDS.3102	MP37.CDS.3132	MP38.CDS.3159	MP1.CDS.3160	MP2.CDS.3725	mp39.CDS.3117
cluster1571	C	Glycerol-3-phosphate ABC transporter, permease protein UgpA (TC 3.A.1.1.3)	MP_ATCC.CDS.1763	MP36.CDS.3105	MP37.CDS.3135	MP38.CDS.3162	MP1.CDS.3163	MP2.CDS.3722	mp39.CDS.3120
cluster1572	C	Glycerol-3-phosphate ABC transporter, permease protein UgpE (TC 3.A.1.1.3)	MP_ATCC.CDS.1765	MP36.CDS.3103	MP37.CDS.3133	MP38.CDS.3160	MP1.CDS.3161	MP2.CDS.3724	mp39.CDS.3118
cluster1458	C	Glycerol-3-phosphate acyltransferase (EC 2.3.1.15)	MP_ATCC.CDS.1639	MP36.CDS.2718	MP37.CDS.2750	MP38.CDS.2827	MP1.CDS.2778	MP2.CDS.2773	mp39.CDS.2745
cluster91	C	Glycerol-3-phosphate acyltransferase (EC 2.3.1.15)	MP_ATCC.CDS.26	MP36.CDS.1692	MP37.CDS.1735	MP38.CDS.1813	MP1.CDS.1757	MP2.CDS.1733	mp39.CDS.1694
cluster1783	C	Glycerol-3-phosphate dehydrogenase (EC 1.1.5.3)	MP_ATCC.CDS.2004	MP36.CDS.3625	MP37.CDS.3655	MP38.CDS.3677	MP1.CDS.3675	MP2.CDS.3204	mp39.CDS.3643
cluster349	C	Glycerol-3-phosphate dehydrogenase (EC 1.1.5.3)	MP_ATCC.CDS.334	MP36.CDS.2457	MP37.CDS.2488	MP38.CDS.2567	MP1.CDS.2521	MP2.CDS.2517	mp39.CDS.2482
cluster3391	E	Glycerol-3-phosphate dehydrogenase [NAD(P)+] (EC 1.1.1.94)	MP_ATCC.CDS.3894	MP36.CDS.3273	MP37.CDS.3301	MP38.CDS.3330	MP1.CDS.3325	MP2.CDS.3556	mp39.CDS.3290
cluster753	E	Glycerol-3-phosphate dehydrogenase [NAD(P)+] (EC 1.1.1.94)	MP_ATCC.CDS.808	MP36.CDS.596	MP37.CDS.655	MP38.CDS.653	MP1.CDS.661	MP2.CDS.658	mp39.CDS.599
cluster2084	I	Glycerophosphoryl diester phosphodiesterase (EC 3.1.4.46)	MP_ATCC.CDS.2348	MP36.CDS.329	MP37.CDS.384	MP38.CDS.385	MP1.CDS.392	MP2.CDS.390	mp39.CDS.328
cluster243	I	Glycerophosphoryl diester phosphodiesterase (EC 3.1.4.46)	MP_ATCC.CDS.206	MP36.CDS.4199	MP37.CDS.4210	MP38.CDS.4230	MP1.CDS.4240	MP2.CDS.4251	mp39.CDS.4176
cluster324	I	Glycerophosphoryl diester phosphodiesterase (EC 3.1.4.46)	MP_ATCC.CDS.306	MP36.CDS.2486	MP37.CDS.2516	MP38.CDS.2593	MP1.CDS.2549	MP2.CDS.2545	mp39.CDS.2511
cluster1100	E	Glycine betaine ABC transport system permease protein	MP_ATCC.CDS.1198	MP36.CDS.4108	MP37.CDS.4119	MP38.CDS.4140	MP1.CDS.4151	MP2.CDS.4161	mp39.CDS.2296
cluster3424	E	Glycine cleavage system H protein	MP_ATCC.CDS.3930	MP36.CDS.1990	MP37.CDS.2027	MP38.CDS.2112	MP1.CDS.2056	MP2.CDS.2054	mp39.CDS.1990
cluster3430	E	Glycine dehydrogenase [decarboxylating] (glycine cleavage system P protein) (EC 1.4.4.2)	MP_ATCC.CDS.3936	MP36.CDS.1996	MP37.CDS.2033	MP38.CDS.2118	MP1.CDS.2062	MP2.CDS.2060	mp39.CDS.1996
cluster5897	E	Glycine dehydrogenase [decarboxylating] (glycine cleavage system P protein) (EC 1.4.4.2)		MP36.CDS.1997
cluster3589	E	Glycine oxidase ThiO (EC 1.4.3.19)	MP_ATCC.CDS.4111	MP36.CDS.431	MP37.CDS.488	MP38.CDS.487	MP1.CDS.494	MP2.CDS.491	mp39.CDS.432
cluster2600	G	Glycogen branching enzyme, GH-57-type, archaeal (EC 2.4.1.18)	MP_ATCC.CDS.2988	MP36.CDS.3319	MP37.CDS.3351	MP38.CDS.3378	MP1.CDS.3372	MP2.CDS.3508	mp39.CDS.3340
cluster77	G	Glycogen debranching enzyme (EC 3.2.1.-)	MP_ATCC.CDS.10	MP36.CDS.1707	MP37.CDS.1750	MP38.CDS.1828	MP1.CDS.1772	MP2.CDS.1748	mp39.CDS.1709
cluster1652	G	Glycogen phosphorylase (EC 2.4.1.1)	MP_ATCC.CDS.1854	MP36.CDS.1444	MP37.CDS.1505	MP38.CDS.1565	MP1.CDS.1515	MP2.CDS.1507	mp39.CDS.1454
cluster3193	G	Glycolate dehydrogenase (EC 1.1.99.14), subunit GlcD	MP_ATCC.CDS.3665	MP36.CDS.1362	MP37.CDS.1422	MP38.CDS.1483	MP1.CDS.1433	MP2.CDS.1428	mp39.CDS.1369
cluster1397	G	Glycosyl transferase	MP_ATCC.CDS.1566	MP36.CDS.3965	MP37.CDS.3981	MP38.CDS.4000	MP1.CDS.4009	MP2.CDS.4021	mp39.CDS.3971
cluster2396	G	Glycosyl transferase family protein	MP_ATCC.CDS.2737	MP36.CDS.1908	MP37.CDS.1945	MP38.CDS.2026	MP1.CDS.1970	MP2.CDS.1951	mp39.CDS.1910
cluster1127	G	Glycosyl transferase, family 2	MP_ATCC.CDS.1226	MP36.CDS.4136	MP37.CDS.4147	MP38.CDS.4168	MP1.CDS.4179	MP2.CDS.4189	mp39.CDS.4114
cluster2385	G	Glycosyl transferase, family 2	MP_ATCC.CDS.2718	MP36.CDS.1635	MP37.CDS.1681	MP38.CDS.1758	MP1.CDS.1702	MP2.CDS.1693	mp39.CDS.1645
cluster2601	G	Glycosyl transferase, group 1	MP_ATCC.CDS.2989	MP36.CDS.3320	MP37.CDS.3352	MP38.CDS.3379	MP1.CDS.3373	MP2.CDS.3507	mp39.CDS.3341
cluster746	G	Glycosyltransferase	MP_ATCC.CDS.801	MP36.CDS.589	MP37.CDS.648	MP38.CDS.646	MP1.CDS.654	MP2.CDS.651	mp39.CDS.592
cluster2325	G	Glycosyltransferase (EC 2.4.1.-)	MP_ATCC.CDS.2648	MP36.CDS.232	MP37.CDS.285	MP38.CDS.287	MP1.CDS.293	MP2.CDS.293	mp39.CDS.228
cluster727	G	Glycosyltransferase (EC 2.4.1.-)	MP_ATCC.CDS.781	MP36.CDS.570	MP37.CDS.628	MP38.CDS.626	MP1.CDS.635	MP2.CDS.632	mp39.CDS.572
cluster3518	G	Glycosyltransferase MshA involved in mycothiol biosynthesis (EC 2.4.1.-)	MP_ATCC.CDS.4034	MP36.CDS.508	MP37.CDS.569	MP38.CDS.566	MP1.CDS.572	MP2.CDS.570	mp39.CDS.510
cluster4568	S	PE_PGRS family protein	MP_ATCC.CDS.2755
cluster119	G	Glycosyltransferase PglI (EC 2.4.1.-)	MP_ATCC.CDS.60	MP36.CDS.1656	MP37.CDS.1700	MP38.CDS.1778	MP1.CDS.1722	MP2.CDS.2034	mp39.CDS.1657
cluster3243	G	Glycosyltransferases involved in cell wall biogenesis	MP_ATCC.CDS.3716	MP36.CDS.1309	MP37.CDS.1371	MP38.CDS.1429	MP1.CDS.1379	MP2.CDS.1375	mp39.CDS.1316
cluster505	J, O	Glycyl-tRNA synthetase (EC 6.1.1.14)	MP_ATCC.CDS.514	MP36.CDS.2577	MP37.CDS.2610	MP38.CDS.2684	MP1.CDS.2638	MP2.CDS.2633	mp39.CDS.2601
cluster2888	J, O	Glyoxalase family protein	MP_ATCC.CDS.3320	MP36.CDS.854	MP37.CDS.917	MP38.CDS.920	MP1.CDS.923	MP2.CDS.925	mp39.CDS.860
cluster3023	J, O	Glyoxalase family protein	MP_ATCC.CDS.3476	MP36.CDS.947	MP37.CDS.1012	MP38.CDS.1012	MP1.CDS.1018	MP2.CDS.1019	mp39.CDS.952
cluster1163	J, O	GMC oxidoreductase	MP_ATCC.CDS.1268	MP36.CDS.515	MP37.CDS.575	MP38.CDS.572	MP1.CDS.579	MP2.CDS.577	mp39.CDS.516
cluster3259	J, O	GMP synthase [glutamine-hydrolyzing] (EC 6.3.5.2)	MP_ATCC.CDS.3737	MP36.CDS.3723	MP37.CDS.3753	MP38.CDS.3774	MP1.CDS.3772	MP2.CDS.3106	mp39.CDS.3742
cluster3348	J, O	gsc	MP_ATCC.CDS.3846	MP36.CDS.3243	MP37.CDS.3272	MP38.CDS.3300	MP1.CDS.3296	MP2.CDS.3586	mp39.CDS.3259
cluster3756	J, O	gsc	MP_ATCC.CDS.66	MP36.CDS.1650	MP37.CDS.1694	MP38.CDS.1772	MP1.CDS.1716	MP2.CDS.2040
cluster199	G	GTP cyclohydrolase I (EC 3.5.4.16) type 1	MP_ATCC.CDS.154	MP36.CDS.3951	MP37.CDS.3968	MP38.CDS.3987	MP1.CDS.3995	MP2.CDS.4007	mp39.CDS.3956
cluster2479	G	GTP pyrophosphokinase (EC 2.7.6.5)	MP_ATCC.CDS.2847	MP36.CDS.1487	MP37.CDS.1546	MP38.CDS.1616	MP1.CDS.1557	MP2.CDS.1549	mp39.CDS.1496
cluster2712	G	GTP pyrophosphokinase (EC 2.7.6.5), (p)ppGpp synthetase I	MP_ATCC.CDS.3115	MP36.CDS.2828	MP37.CDS.2862	MP38.CDS.1136	MP1.CDS.2891	MP2.CDS.2885	mp39.CDS.2854
cluster1259	G	GTP-binding and nucleic acid-binding protein YchF	MP_ATCC.CDS.1387	MP36.CDS.1204	MP37.CDS.1266	MP38.CDS.1323	MP1.CDS.1274	MP2.CDS.1271	mp39.CDS.1212
cluster1931	G	GTP-binding protein EngA	MP_ATCC.CDS.2170	MP36.CDS.1857	MP37.CDS.1894	MP38.CDS.1975	MP1.CDS.1919	MP2.CDS.1897	mp39.CDS.1858
cluster498	G	GTP-binding protein Era	MP_ATCC.CDS.507	MP36.CDS.2584	MP37.CDS.2617	MP38.CDS.2691	MP1.CDS.2645	MP2.CDS.2640	mp39.CDS.2608
cluster624	G	GTP-binding protein HflX	MP_ATCC.CDS.651	MP36.CDS.2977	MP37.CDS.3008	MP38.CDS.3031	MP1.CDS.3033	MP2.CDS.3851	mp39.CDS.3001
cluster1422	G	GTP-binding protein Obg	MP_ATCC.CDS.1598	MP36.CDS.2677	MP37.CDS.2708	MP38.CDS.2785	MP1.CDS.2737	MP2.CDS.2732	mp39.CDS.2702
cluster3301	G	GTP-binding protein Obg	MP_ATCC.CDS.3785	MP36.CDS.3673	MP37.CDS.3705	MP38.CDS.3726	MP1.CDS.3724	MP2.CDS.3155	mp39.CDS.3692
cluster3662	G	GTP-binding protein TypA/BipA	MP_ATCC.CDS.4197	MP36.CDS.1268	MP37.CDS.1328	MP38.CDS.1384	MP1.CDS.1336	MP2.CDS.1333	mp39.CDS.1274
cluster2966	F	Guanine deaminase (EC 3.5.4.3)	MP_ATCC.CDS.3409	MP36.CDS.881	MP37.CDS.943	MP38.CDS.946	MP1.CDS.949	MP2.CDS.951	mp39.CDS.886
cluster2460	T	Guanylate kinase (EC 2.7.4.8)	MP_ATCC.CDS.2825	MP36.CDS.1510	MP37.CDS.1568	MP38.CDS.1638	MP1.CDS.1579	MP2.CDS.1571	mp39.CDS.1518
cluster3225	S	HAD-superfamily subfamily IIA hydrolase, hypothetical 2	MP_ATCC.CDS.3698	MP36.CDS.1327	MP37.CDS.1389	MP38.CDS.1447	MP1.CDS.1397	MP2.CDS.1393	mp39.CDS.1334
cluster2716	R	Haloalkane dehalogenase (EC 3.8.1.5)	MP_ATCC.CDS.3119	MP36.CDS.2824	MP37.CDS.2858	MP38.CDS.1132	MP1.CDS.2887	MP2.CDS.2881	mp39.CDS.2850
cluster310	R	Haloalkane dehalogenase (EC 3.8.1.5)	MP_ATCC.CDS.290	MP36.CDS.2503	MP37.CDS.2533	MP38.CDS.2609	MP1.CDS.2564	MP2.CDS.2560	mp39.CDS.2526
cluster2536	K	Heat shock protein 22.5 (Hsp22.5)	MP_ATCC.CDS.2915	MP36.CDS.1059	MP37.CDS.1124	MP38.CDS.1180	MP1.CDS.1132	MP2.CDS.1131	mp39.CDS.1070
cluster36	K	Heat shock protein 60 family chaperone GroEL	MP_ATCC.CDS.2934;MP_ATCC.CDS.4085	MP36.CDS.3745;MP36.CDS.457	MP37.CDS.3775;MP37.CDS.515	MP38.CDS.3796;MP38.CDS.513	MP1.CDS.3795;MP1.CDS.520	MP2.CDS.3084;MP2.CDS.517	mp39.CDS.3765;mp39.CDS.458
cluster2553	S	Heat shock protein 60 family co-chaperone GroES	MP_ATCC.CDS.2935	MP36.CDS.3746	MP37.CDS.3776	MP38.CDS.3797	MP1.CDS.3796	MP2.CDS.3083	mp39.CDS.3766
cluster2132	S	Heat shock protein GrpE	MP_ATCC.CDS.2403	MP36.CDS.363	MP37.CDS.419	MP38.CDS.420	MP1.CDS.427	MP2.CDS.424	mp39.CDS.362
cluster227	S	Heat shock protein HtrA	MP_ATCC.CDS.187	MP36.CDS.1052	MP37.CDS.1117	MP38.CDS.1173	MP1.CDS.1125	MP2.CDS.1124	mp39.CDS.1063
cluster490	S	Heat-inducible transcription repressor HrcA	MP_ATCC.CDS.496	MP36.CDS.2595	MP37.CDS.2627	MP38.CDS.2702	MP1.CDS.2656	MP2.CDS.2651	mp39.CDS.2619
cluster3137	K	Helicase	MP_ATCC.CDS.3604	MP36.CDS.2209	MP37.CDS.2241	MP38.CDS.2323	MP1.CDS.2272	MP2.CDS.2271	mp39.CDS.2207
cluster2448	K	Helicase PriA essential for oriC/DnaA-independent DNA replication	MP_ATCC.CDS.2811	MP36.CDS.1523	MP37.CDS.1582	MP38.CDS.1652	MP1.CDS.1593	MP2.CDS.1585	mp39.CDS.1532
cluster2928	K	Helicase, C-terminal	MP_ATCC.CDS.3366	MP36.CDS.2144	MP37.CDS.2176	MP38.CDS.2258	MP1.CDS.2207	MP2.CDS.2207	mp39.CDS.2137
cluster2827	K	Helicase, SNF2/RAD54 family	MP_ATCC.CDS.3245	MP36.CDS.2297	MP37.CDS.2328	MP38.CDS.2407	MP1.CDS.2360	MP2.CDS.2358	mp39.CDS.2319
cluster3898	R	Heme O synthase, protoheme IX farnesyltransferase (EC 2.5.1.-) COX10-CtaB	MP_ATCC.CDS.3326	MP36.CDS.1579	MP37.CDS.1627	MP38.CDS.857			mp39.CDS.1591
cluster1450	R	Hemoglobin-like protein HbO	MP_ATCC.CDS.1630	MP36.CDS.2709	MP37.CDS.2740	MP38.CDS.2817	MP1.CDS.2768	MP2.CDS.2764	mp39.CDS.2735
cluster579	R	Hemoprotein HemQ, essential component of heme biosynthetic pathway in Gram-positive bacteria	MP_ATCC.CDS.600	MP36.CDS.2929	MP37.CDS.2959	MP38.CDS.2982	MP1.CDS.2985	MP2.CDS.3900	mp39.CDS.2952
cluster1349	R	High molecular weight glutenin subunit x precursor	MP_ATCC.CDS.1515	MP36.CDS.3	MP37.CDS.60	MP38.CDS.59	MP1.CDS.69	MP2.CDS.69	mp39.CDS.3
cluster3055	R	High-affinity choline uptake protein BetT	MP_ATCC.CDS.3512	MP36.CDS.984	MP37.CDS.1048	MP38.CDS.1048	MP1.CDS.1054	MP2.CDS.1054	mp39.CDS.989
cluster39	T	Histidine kinase response regulator	MP_ATCC.CDS.3600;MP_ATCC.CDS.574	MP36.CDS.2213;MP36.CDS.3433	MP37.CDS.2245;MP37.CDS.3462	MP38.CDS.2327;MP38.CDS.3490	MP1.CDS.2276;MP1.CDS.3484	MP2.CDS.2275;MP2.CDS.3396	mp39.CDS.2211;mp39.CDS.3454
cluster1821	T	Histidinol dehydrogenase (EC 1.1.1.23)	MP_ATCC.CDS.2045	MP36.CDS.1728	MP37.CDS.1770	MP38.CDS.1850	MP1.CDS.1792	MP2.CDS.1769	mp39.CDS.1730
cluster1826	T	Histidinol-phosphatase [alternative form] (EC 3.1.3.15)	MP_ATCC.CDS.2050	MP36.CDS.1733	MP37.CDS.1775	MP38.CDS.1855	MP1.CDS.1797	MP2.CDS.1774	mp39.CDS.1735
cluster552	T	Histidinol-phosphatase [alternative form] (EC 3.1.3.15)	MP_ATCC.CDS.568	MP36.CDS.3441	MP37.CDS.3469	MP38.CDS.3496	MP1.CDS.3491	MP2.CDS.3390	mp39.CDS.3461
cluster1822	T	Histidinol-phosphate aminotransferase (EC 2.6.1.9)	MP_ATCC.CDS.2046	MP36.CDS.1729	MP37.CDS.1771	MP38.CDS.1851	MP1.CDS.1793	MP2.CDS.1770	mp39.CDS.1731
cluster2715	A	Histidyl-tRNA synthetase (EC 6.1.1.21)	MP_ATCC.CDS.3118	MP36.CDS.2825	MP37.CDS.2859	MP38.CDS.1133	MP1.CDS.2888	MP2.CDS.2882	mp39.CDS.2851
cluster2238	R	Histone acetyltransferase HPA2 and related acetyltransferases	MP_ATCC.CDS.2549	MP36.CDS.132	MP37.CDS.188	MP38.CDS.188	MP1.CDS.196	MP2.CDS.195	mp39.CDS.129
cluster3576	R	Histone acetyltransferase HPA2 and related acetyltransferases	MP_ATCC.CDS.4097	MP36.CDS.445	MP37.CDS.502	MP38.CDS.501	MP1.CDS.508	MP2.CDS.505	mp39.CDS.446
cluster188	R	Histone protein Lsr2	MP_ATCC.CDS.143	MP36.CDS.3940	MP37.CDS.3957	MP38.CDS.3976	MP1.CDS.3984	MP2.CDS.3996	mp39.CDS.3945
cluster948	F, G	HIT family protein	MP_ATCC.CDS.1027	MP36.CDS.810	MP37.CDS.873	MP38.CDS.876	MP1.CDS.879	MP2.CDS.879	mp39.CDS.817
cluster2679	V	HNH endonuclease domain protein	MP_ATCC.CDS.3075	MP36.CDS.2196	MP37.CDS.2228	MP38.CDS.4297	MP1.CDS.4296	MP2.CDS.4305	mp39.CDS.2189
cluster5576	V	HNH endonuclease domain protein				MP38.CDS.2039
cluster5647	V	HNH endonuclease domain protein		MP36.CDS.2197
cluster1449	V	HNH endonuclease family protein	MP_ATCC.CDS.1629	MP36.CDS.2708	MP37.CDS.2739	MP38.CDS.2816	MP1.CDS.2767	MP2.CDS.2763	mp39.CDS.2734
cluster2704	P	Holliday junction DNA helicase RuvA	MP_ATCC.CDS.3105	MP36.CDS.2838	MP37.CDS.2872	MP38.CDS.1146	MP1.CDS.2902	MP2.CDS.3991	mp39.CDS.2865
cluster2705	P	Holliday junction DNA helicase RuvB	MP_ATCC.CDS.3106	MP36.CDS.2837	MP37.CDS.2871	MP38.CDS.1145	MP1.CDS.2901	MP2.CDS.3992	mp39.CDS.2864
cluster2769	I	Holo-[acyl-carrier protein] synthase (EC 2.7.8.7)	MP_ATCC.CDS.3180	MP36.CDS.2763	MP37.CDS.2797	MP38.CDS.2874	MP1.CDS.2825	MP2.CDS.2819	mp39.CDS.2793
cluster1437	E	Homocysteine S-methyltransferase (EC 2.1.1.10)	MP_ATCC.CDS.1617	MP36.CDS.2696	MP37.CDS.2727	MP38.CDS.2804	MP1.CDS.2755	MP2.CDS.2751	mp39.CDS.2721
cluster3156	E	Homoserine dehydrogenase (EC 1.1.1.3)	MP_ATCC.CDS.3623	MP36.CDS.1403	MP37.CDS.1466	MP38.CDS.1525	MP1.CDS.1474	MP2.CDS.1469	mp39.CDS.1413
cluster3154	E	Homoserine kinase (EC 2.7.1.39)	MP_ATCC.CDS.3621	MP36.CDS.1405	MP37.CDS.1468	MP38.CDS.1527	MP1.CDS.1476	MP2.CDS.1471	mp39.CDS.1415
cluster3303	E	Homoserine O-acetyltransferase (EC 2.3.1.31)	MP_ATCC.CDS.3788	MP36.CDS.3670	MP37.CDS.3702	MP38.CDS.3723	MP1.CDS.3721	MP2.CDS.3158	mp39.CDS.3689
cluster1551	P	HoxN/HupN/NixA family nickel/cobalt transporter	MP_ATCC.CDS.1741	MP36.CDS.3129	MP37.CDS.3158	MP38.CDS.3185	MP1.CDS.3186	MP2.CDS.3698	mp39.CDS.3143
cluster2351	O	hsp	MP_ATCC.CDS.2675	MP36.CDS.260	MP37.CDS.313	MP38.CDS.315	MP1.CDS.321	MP2.CDS.321	mp39.CDS.256
cluster3131	O	hsp	MP_ATCC.CDS.3595	MP36.CDS.2218	MP37.CDS.2250	MP38.CDS.2331	MP1.CDS.2281	MP2.CDS.2280	mp39.CDS.2215
cluster2134	O	HspR, transcriptional repressor of DnaK operon	MP_ATCC.CDS.2405	MP36.CDS.365	MP37.CDS.421	MP38.CDS.422	MP1.CDS.429	MP2.CDS.426	mp39.CDS.364
cluster2915	O	HTH-type transcriptional regulator	MP_ATCC.CDS.3351	MP36.CDS.2160	MP37.CDS.2191	MP38.CDS.2273	MP1.CDS.2223	MP2.CDS.2222	mp39.CDS.2152
cluster2074	O	HTH-type transcriptional regulator BetI	MP_ATCC.CDS.2338	MP36.CDS.339	MP37.CDS.394	MP38.CDS.396	MP1.CDS.402	MP2.CDS.400	mp39.CDS.338
cluster2643	I	Hydride transferase 1 (Fragment)	MP_ATCC.CDS.3035	MP36.CDS.3365	MP37.CDS.3396	MP38.CDS.3425	MP1.CDS.3418	MP2.CDS.3462	mp39.CDS.3387
cluster2648	I	Hydride transferase 1 (Fragment)	MP_ATCC.CDS.3041	MP36.CDS.3372	MP37.CDS.3403	MP38.CDS.3432	MP1.CDS.3425	MP2.CDS.3455	mp39.CDS.3395
cluster3079	I	Hydride transferase 1 (Fragment)	MP_ATCC.CDS.3536	MP36.CDS.1008	MP37.CDS.1072	MP38.CDS.1072	MP1.CDS.1078	MP2.CDS.1078	mp39.CDS.1014
cluster3091	I	Hydride transferase 1 (Fragment)	MP_ATCC.CDS.3549	MP36.CDS.1023	MP37.CDS.1086	MP38.CDS.1086	MP1.CDS.1093	MP2.CDS.1093	mp39.CDS.1029
cluster3706	I	Hydride transferase 1 (Fragment)	MP_ATCC.CDS.4248	MP36.CDS.2362	MP37.CDS.2392	MP38.CDS.2471	MP1.CDS.2426	MP2.CDS.2422	mp39.CDS.2384
cluster1408	C	Hydrogen peroxide-inducible genes activator	MP_ATCC.CDS.1580	MP36.CDS.2660	MP37.CDS.2691	MP38.CDS.2768	MP1.CDS.2720	MP2.CDS.2715	mp39.CDS.2685
cluster2222	C	Hydrogen peroxide-inducible genes activator	MP_ATCC.CDS.2530	MP36.CDS.112	MP37.CDS.169	MP38.CDS.169	MP1.CDS.177	MP2.CDS.176	mp39.CDS.111
cluster1190	C	Hydrogenase-4 component B / Formate hydrogenlyase subunit 3	MP_ATCC.CDS.1300	MP36.CDS.75	MP37.CDS.133	MP38.CDS.130	MP1.CDS.140	MP2.CDS.140	mp39.CDS.75
cluster1192	C	Hydrogenase-4 component E	MP_ATCC.CDS.1302	MP36.CDS.77	MP37.CDS.135	MP38.CDS.132	MP1.CDS.142	MP2.CDS.142	mp39.CDS.77
cluster1193	C	Hydrogenase-4 component F	MP_ATCC.CDS.1303	MP36.CDS.78	MP37.CDS.136	MP38.CDS.133	MP1.CDS.143	MP2.CDS.143	mp39.CDS.78
cluster3432	S	Hydrolase	MP_ATCC.CDS.3939	MP36.CDS.2000	MP37.CDS.2036	MP38.CDS.2120	MP1.CDS.2064	MP2.CDS.2063	mp39.CDS.1998
cluster183	S	Hydrolase, alpha/beta fold family	MP_ATCC.CDS.137	MP36.CDS.3933	MP37.CDS.3951	MP38.CDS.3970	MP1.CDS.4290	MP2.CDS.2897	mp39.CDS.3938
cluster3748	S	Hydrolase, alpha/beta fold family	MP_ATCC.CDS.4294	MP36.CDS.3811	MP37.CDS.3829	MP38.CDS.1604	MP1.CDS.3860	MP2.CDS.3020	mp39.CDS.3815
cluster615	S	Hydrolase, alpha/beta fold family	MP_ATCC.CDS.642	MP36.CDS.2968	MP37.CDS.2999	MP38.CDS.3022	MP1.CDS.3024	MP2.CDS.3860	mp39.CDS.2992
cluster3431	S	Hydrolase, alpha/beta fold family protein, At1g52510/AT4G12830 homolog 2	MP_ATCC.CDS.3938	MP36.CDS.1999	MP37.CDS.2035	MP38.CDS.2119	MP1.CDS.2063	MP2.CDS.2062	mp39.CDS.1997
cluster1793	S	Hydrolase, alpha/beta hydrolase fold family	MP_ATCC.CDS.2014	MP36.CDS.3635	MP37.CDS.3665	MP38.CDS.3687	MP1.CDS.3685	MP2.CDS.3194	mp39.CDS.3653
cluster3682	S	hydrolase, alpha/beta hydrolase fold family	MP_ATCC.CDS.4221	MP36.CDS.1293	MP37.CDS.1353	MP38.CDS.1410	MP1.CDS.1361	MP2.CDS.1358	mp39.CDS.1301
cluster3255	S	Hydrolase, haloacid dehalogenase-like family	MP_ATCC.CDS.3733	MP36.CDS.3727	MP37.CDS.3757	MP38.CDS.3778	MP1.CDS.3776	MP2.CDS.3102	mp39.CDS.3746
cluster3277	S	Hydrolase, haloacid dehalogenase-like family	MP_ATCC.CDS.3756	MP36.CDS.3703	MP37.CDS.3733	MP38.CDS.3755	MP1.CDS.3753	MP2.CDS.3126	mp39.CDS.3722
cluster3690	S	Hydrolase, haloacid dehalogenase-like family	MP_ATCC.CDS.4232	MP36.CDS.3410	MP37.CDS.3439	MP38.CDS.3468	MP1.CDS.3461	MP2.CDS.3418	mp39.CDS.3433
cluster299	S	Hydrolases of the alpha/beta superfamily	MP_ATCC.CDS.279	MP36.CDS.2514	MP37.CDS.2545	MP38.CDS.2620	MP1.CDS.2575	MP2.CDS.2571	mp39.CDS.2537
cluster2714	S	Hydroxyacylglutathione hydrolase (EC 3.1.2.6)	MP_ATCC.CDS.3117	MP36.CDS.2826	MP37.CDS.2860	MP38.CDS.1134	MP1.CDS.2889	MP2.CDS.2883	mp39.CDS.2852
cluster2647	S	hydroxylaminobenzene mutase	MP_ATCC.CDS.3040	MP36.CDS.3371	MP37.CDS.3402	MP38.CDS.3431	MP1.CDS.3424	MP2.CDS.3456	mp39.CDS.3394
cluster1472	S	Hydroxymethylglutaryl-CoA lyase (EC 4.1.3.4)	MP_ATCC.CDS.1657	MP36.CDS.2737	MP37.CDS.2770	MP38.CDS.2847	MP1.CDS.2799	MP2.CDS.2793	mp39.CDS.2766
cluster3581	S	Hydroxymethylpyrimidine phosphate kinase ThiD (EC 2.7.4.7)	MP_ATCC.CDS.4103	MP36.CDS.439	MP37.CDS.496	MP38.CDS.495	MP1.CDS.502	MP2.CDS.499	mp39.CDS.440
cluster3580	S	Hydroxymethylpyrimidine phosphate synthase ThiC (EC 4.1.99.17)	MP_ATCC.CDS.4102	MP36.CDS.440	MP37.CDS.497	MP38.CDS.496	MP1.CDS.503	MP2.CDS.500	mp39.CDS.441
cluster3313	S	Hydroxyproline-rich glycoprotein DZ-HRGP precursor	MP_ATCC.CDS.3798	MP36.CDS.3660	MP37.CDS.3692	MP38.CDS.3713	MP1.CDS.3711	MP2.CDS.3168	mp39.CDS.3679
cluster4569	S	PE_PGRS family protein	MP_ATCC.CDS.2754
cluster2809	S	Hypothetical membrane protein Rv2120c	MP_ATCC.CDS.3225	MP36.CDS.2316	MP37.CDS.2346	MP38.CDS.2425	MP1.CDS.2380	MP2.CDS.2377	mp39.CDS.2338
cluster1017	S	Hypothetical nudix hydrolase YeaB	MP_ATCC.CDS.1105	MP36.CDS.4013	MP37.CDS.4027	MP38.CDS.4046	MP1.CDS.4057	MP2.CDS.4066	mp39.CDS.4016
cluster1047	S	hypothetical protein	MP_ATCC.CDS.1137	MP36.CDS.4046	MP37.CDS.4058	MP38.CDS.4078	MP1.CDS.4089	MP2.CDS.4099	mp39.CDS.4048
cluster1304	S	hypothetical protein	MP_ATCC.CDS.1445	MP36.CDS.4245	MP37.CDS.4257	MP38.CDS.4274	MP1.CDS.4284	MP2.CDS.4296	mp39.CDS.4220
cluster1310	S	hypothetical protein	MP_ATCC.CDS.1453	MP36.CDS.4254	MP37.CDS.4265	MP38.CDS.4282	MP1.CDS.8	MP2.CDS.8	mp39.CDS.4228
cluster1515	S	hypothetical protein	MP_ATCC.CDS.1701	MP36.CDS.3170	MP37.CDS.3198	MP38.CDS.3226	MP1.CDS.3227	MP2.CDS.3657	mp39.CDS.3183
cluster1740	S	hypothetical protein	MP_ATCC.CDS.1957	MP36.CDS.3578	MP37.CDS.3609	MP38.CDS.3631	MP1.CDS.3629	MP2.CDS.3251	mp39.CDS.3597
cluster1887	S	hypothetical protein	MP_ATCC.CDS.2123	MP36.CDS.1808	MP37.CDS.1845	MP38.CDS.1926	MP1.CDS.1870	MP2.CDS.1847	mp39.CDS.1809
cluster1895	S	hypothetical protein	MP_ATCC.CDS.2132	MP36.CDS.1817	MP37.CDS.1854	MP38.CDS.1935	MP1.CDS.1879	MP2.CDS.1856	mp39.CDS.1818
cluster1957	S	hypothetical protein	MP_ATCC.CDS.2198	MP36.CDS.1886	MP37.CDS.1923	MP38.CDS.2004	MP1.CDS.1948	MP2.CDS.1927	mp39.CDS.1887
cluster2099	S	hypothetical protein	MP_ATCC.CDS.2366	MP36.CDS.312	MP37.CDS.367	MP38.CDS.368	MP1.CDS.375	MP2.CDS.373	mp39.CDS.310
cluster2130	S	hypothetical protein	MP_ATCC.CDS.2401	MP36.CDS.361	MP37.CDS.417	MP38.CDS.418	MP1.CDS.425	MP2.CDS.422	mp39.CDS.360
cluster2137	S	hypothetical protein	MP_ATCC.CDS.2416	MP36.CDS.3220	MP37.CDS.3249	MP38.CDS.3277	MP1.CDS.3275	MP2.CDS.3608	mp39.CDS.3235
cluster2138	S	hypothetical protein	MP_ATCC.CDS.2417	MP36.CDS.3221	MP37.CDS.3250	MP38.CDS.3278	MP1.CDS.3276	MP2.CDS.3607	mp39.CDS.3236
cluster2139	S	hypothetical protein	MP_ATCC.CDS.2418	MP36.CDS.3222	MP37.CDS.3251	MP38.CDS.3279	MP1.CDS.3277	MP2.CDS.3606	mp39.CDS.3237
cluster2145	S	hypothetical protein	MP_ATCC.CDS.2428	MP36.CDS.3232	MP37.CDS.3261	MP38.CDS.3289	MP1.CDS.3287	MP2.CDS.3596	mp39.CDS.3248
cluster2196	S	hypothetical protein	MP_ATCC.CDS.2493	MP36.CDS.2557	MP37.CDS.2589	MP38.CDS.2663	MP1.CDS.2618	MP2.CDS.2613	mp39.CDS.2579
cluster2346	S	hypothetical protein	MP_ATCC.CDS.2670	MP36.CDS.255	MP37.CDS.308	MP38.CDS.310	MP1.CDS.316	MP2.CDS.316	mp39.CDS.251
cluster2416	S	hypothetical protein	MP_ATCC.CDS.2778	MP36.CDS.1555	MP37.CDS.1614	MP38.CDS.1684	MP1.CDS.1626	MP2.CDS.1618	mp39.CDS.1566
cluster2575	S	hypothetical protein	MP_ATCC.CDS.2960	MP36.CDS.3784	MP37.CDS.3802	MP38.CDS.3833	MP1.CDS.3833	MP2.CDS.3046	mp39.CDS.3789
cluster2576	S	hypothetical protein	MP_ATCC.CDS.2961	MP36.CDS.3785	MP37.CDS.3803	MP38.CDS.3834	MP1.CDS.3834	MP2.CDS.3045	mp39.CDS.3790
cluster2577	S	hypothetical protein	MP_ATCC.CDS.2964	MP36.CDS.3788	MP37.CDS.3806	MP38.CDS.3836	MP1.CDS.3837	MP2.CDS.3043	mp39.CDS.3792
cluster2847	S	hypothetical protein	MP_ATCC.CDS.3272	MP36.CDS.2268	MP37.CDS.2298	MP38.CDS.2382	MP1.CDS.2332	MP2.CDS.2329	mp39.CDS.2267
cluster2893	S	hypothetical protein	MP_ATCC.CDS.3329	MP36.CDS.2182	MP37.CDS.2213	MP38.CDS.2295	MP1.CDS.2245	MP2.CDS.2244	mp39.CDS.2174
cluster2953	S	hypothetical protein	MP_ATCC.CDS.3394	MP36.CDS.2204	MP37.CDS.2236	MP38.CDS.2318	MP1.CDS.2267	MP2.CDS.2266	mp39.CDS.2202
cluster2979	S	hypothetical protein	MP_ATCC.CDS.3427	MP36.CDS.898	MP37.CDS.962	MP38.CDS.964	MP1.CDS.967	MP2.CDS.969	mp39.CDS.903
cluster2989	S	hypothetical protein	MP_ATCC.CDS.3438	MP36.CDS.909	MP37.CDS.973	MP38.CDS.975	MP1.CDS.978	MP2.CDS.980	mp39.CDS.914
cluster3120	S	hypothetical protein	MP_ATCC.CDS.3584	MP36.CDS.2231	MP37.CDS.2261	MP38.CDS.2344	MP1.CDS.2292	MP2.CDS.2291	mp39.CDS.2227
cluster3130	S	hypothetical protein	MP_ATCC.CDS.3594	MP36.CDS.2220	MP37.CDS.2251	MP38.CDS.2333	MP1.CDS.2282	MP2.CDS.2281	mp39.CDS.2217
cluster3228	S	hypothetical protein	MP_ATCC.CDS.3701	MP36.CDS.1324	MP37.CDS.1386	MP38.CDS.1444	MP1.CDS.1394	MP2.CDS.1390	mp39.CDS.1331
cluster3240	S	hypothetical protein	MP_ATCC.CDS.3713	MP36.CDS.1312	MP37.CDS.1374	MP38.CDS.1432	MP1.CDS.1382	MP2.CDS.1378	mp39.CDS.1319
cluster3245	S	hypothetical protein	MP_ATCC.CDS.3719	MP36.CDS.1307	MP37.CDS.1368	MP38.CDS.1427	MP1.CDS.1376	MP2.CDS.1372	mp39.CDS.1314
cluster3312	S	hypothetical protein	MP_ATCC.CDS.3797	MP36.CDS.3661	MP37.CDS.3693	MP38.CDS.3714	MP1.CDS.3712	MP2.CDS.3167	mp39.CDS.3680
cluster3322	S	hypothetical protein	MP_ATCC.CDS.3810	MP36.CDS.4228	MP37.CDS.4240	MP38.CDS.4260	MP1.CDS.4269	MP2.CDS.4281	mp39.CDS.4206
cluster3428	S	hypothetical protein	MP_ATCC.CDS.3934	MP36.CDS.1994	MP37.CDS.2031	MP38.CDS.2116	MP1.CDS.2060	MP2.CDS.2058	mp39.CDS.1994
cluster3436	S	hypothetical protein	MP_ATCC.CDS.3944	MP36.CDS.2005	MP37.CDS.2042	MP38.CDS.2125	MP1.CDS.2069	MP2.CDS.2068	mp39.CDS.2003
cluster3549	S	hypothetical protein	MP_ATCC.CDS.4065	MP36.CDS.477	MP37.CDS.535	MP38.CDS.533	MP1.CDS.540	MP2.CDS.537	mp39.CDS.478
cluster3733	S	hypothetical protein	MP_ATCC.CDS.4278	MP36.CDS.4169	MP37.CDS.4179	MP38.CDS.4200	MP1.CDS.4210	MP2.CDS.4221	mp39.CDS.4145
cluster3742	S	hypothetical protein	MP_ATCC.CDS.4287	MP36.CDS.4178	MP37.CDS.4188	MP38.CDS.4209	MP1.CDS.4219	MP2.CDS.4230	mp39.CDS.4154
cluster3784	S	hypothetical protein	MP_ATCC.CDS.1454	MP36.CDS.4255	MP37.CDS.4266	MP38.CDS.4283	MP1.CDS.9	MP2.CDS.9
cluster4011	S	hypothetical protein			MP37.CDS.2352		MP1.CDS.2386	MP2.CDS.2383
cluster4130	S	hypothetical protein				MP38.CDS.2324
cluster420	S	hypothetical protein	MP_ATCC.CDS.411	MP36.CDS.2379	MP37.CDS.2410	MP38.CDS.2489	MP1.CDS.2443	MP2.CDS.2440	mp39.CDS.2403
cluster4214	S	hypothetical protein			MP37.CDS.948
cluster4216	S	hypothetical protein			MP37.CDS.1181
cluster4285	S	hypothetical protein							mp39.CDS.4295
cluster4286	S	hypothetical protein							mp39.CDS.4297
cluster44	S	hypothetical protein	MP_ATCC.CDS.2857	MP36.CDS.1955	MP37.CDS.1361;MP37.CDS.1992	MP38.CDS.1238;MP38.CDS.2077;MP38.CDS.1418	MP1.CDS.1189;MP1.CDS.2021	MP2.CDS.1187;MP2.CDS.2002	mp39.CDS.2590;mp39.CDS.1127;mp39.CDS.1953
cluster4444	S	hypothetical protein							mp39.CDS.1264
cluster4458	S	hypothetical protein				MP38.CDS.1241
cluster4512	S	hypothetical protein							mp39.CDS.1954
cluster4576	S	hypothetical protein				MP38.CDS.4301
cluster4579	S	hypothetical protein				MP38.CDS.4306
cluster4634	S	hypothetical protein							mp39.CDS.872
cluster4677	S	hypothetical protein			MP37.CDS.411
cluster4750	S	hypothetical protein						MP2.CDS.4308
cluster4760	S	hypothetical protein			MP37.CDS.1318
cluster478	S	hypothetical protein	MP_ATCC.CDS.484	MP36.CDS.2607	MP37.CDS.2639	MP38.CDS.2714	MP1.CDS.2668	MP2.CDS.2663	mp39.CDS.2631
cluster479	S	hypothetical protein	MP_ATCC.CDS.485	MP36.CDS.2606	MP37.CDS.2638	MP38.CDS.2713	MP1.CDS.2667	MP2.CDS.2662	mp39.CDS.2630
cluster4898	S	hypothetical protein							mp39.CDS.2208
cluster4920	S	hypothetical protein							mp39.CDS.4300
[truncated: 2,419 more rows]
